# Supplementary material for: Indoor PM2.5 Mortality in China when Outdoor Air Meets 2021 WHO AQG
Source: Research Square preprint supplement (doi:10.21203/rs.3.rs-1137306/v1), 2021-12-09
Supplement: Supplementary file 1 [file 090667c9b1433cbce0f35e5f.xlsx]

## Sheet: Sheet1
Diseases					Ischemic heart disease (IHD)				Obstructive pulmonary disease (COPD)				Lung cancer (LC)				Lower respiratory infections (LRI)				Type 2 diabetes (DM2)				Stroke				Total
Sources of PM2.5					Ambient	Cooking	Smoking	Total	Ambient	Cooking	Smoking	Total	Ambient	Cooking	Smoking	Total	Ambient	Cooking	Smoking	Total	Ambient	Cooking	Smoking	Total	Ambient	Cooking	Smoking	Total	Ambient	Cooking	Smoking	Total
City	Province	Region	Gender	Age	Mean (95% CI)
Beijing	Beijing	North	Male	0 y～	0 (0, 0)	0 (0, 0)	0 (0, 0)	0 (0, 0)	0 (0, 0)	0 (0, 0)	0 (0, 0)	0 (0, 0)	0 (0, 0)	0 (0, 0)	0 (0, 0)	0 (0, 0)	1 (1, 1)	1 (1, 1)	0 (0, 0)	2 (1, 2)	0 (0, 0)	0 (0, 0)	0 (0, 0)	0 (0, 0)	0 (0, 0)	0 (0, 0)	0 (0, 0)	0 (0, 0)	1 (1, 1)	1 (1, 1)	0 (0, 0)	2 (1, 2)
Beijing	Beijing	North	Male	1 y～	0 (0, 0)	0 (0, 0)	0 (0, 0)	0 (0, 0)	0 (0, 0)	0 (0, 0)	0 (0, 0)	0 (0, 0)	0 (0, 0)	0 (0, 0)	0 (0, 0)	0 (0, 0)	1 (1, 1)	1 (0, 1)	0 (0, 0)	2 (1, 2)	0 (0, 0)	0 (0, 0)	0 (0, 0)	0 (0, 0)	0 (0, 0)	0 (0, 0)	0 (0, 0)	0 (0, 0)	1 (1, 1)	1 (0, 1)	0 (0, 0)	2 (1, 2)
Beijing	Beijing	North	Male	5 y～	0 (0, 0)	0 (0, 0)	0 (0, 0)	0 (0, 0)	0 (0, 0)	0 (0, 0)	0 (0, 0)	0 (0, 0)	0 (0, 0)	0 (0, 0)	0 (0, 0)	0 (0, 0)	0 (0, 0)	0 (0, 0)	0 (0, 0)	1 (1, 1)	0 (0, 0)	0 (0, 0)	0 (0, 0)	0 (0, 0)	0 (0, 0)	0 (0, 0)	0 (0, 0)	0 (0, 0)	1 (0, 1)	0 (0, 1)	0 (0, 0)	1 (1, 1)
Beijing	Beijing	North	Male	10 y～	0 (0, 0)	0 (0, 0)	0 (0, 0)	0 (0, 0)	0 (0, 0)	0 (0, 0)	0 (0, 0)	0 (0, 0)	0 (0, 0)	0 (0, 0)	0 (0, 0)	0 (0, 0)	0 (0, 0)	0 (0, 0)	0 (0, 0)	0 (0, 1)	0 (0, 0)	0 (0, 0)	0 (0, 0)	0 (0, 0)	0 (0, 0)	0 (0, 0)	0 (0, 0)	1 (1, 1)	1 (1, 1)	1 (0, 1)	0 (0, 0)	1 (1, 2)
Beijing	Beijing	North	Male	15 y～	1 (1, 1)	1 (1, 1)	0 (0, 0)	2 (1, 2)	0 (0, 0)	0 (0, 0)	0 (0, 0)	0 (0, 0)	0 (0, 0)	0 (0, 0)	0 (0, 0)	0 (0, 0)	0 (0, 0)	0 (0, 0)	0 (0, 0)	1 (0, 1)	0 (0, 0)	0 (0, 0)	0 (0, 0)	0 (0, 0)	1 (1, 1)	1 (1, 1)	0 (0, 0)	2 (2, 3)	2 (2, 2)	2 (2, 2)	1 (1, 1)	5 (4, 6)
Beijing	Beijing	North	Male	20 y～	3 (2, 3)	2 (2, 3)	1 (1, 1)	6 (5, 7)	0 (0, 0)	0 (0, 0)	0 (0, 0)	0 (0, 0)	0 (0, 0)	0 (0, 0)	0 (0, 0)	1 (1, 1)	1 (1, 2)	1 (1, 1)	0 (0, 1)	3 (2, 3)	0 (0, 0)	0 (0, 0)	0 (0, 0)	0 (0, 0)	1 (1, 2)	1 (1, 1)	1 (1, 1)	3 (3, 4)	6 (5, 7)	5 (4, 5)	2 (2, 3)	13 (11, 15)
Beijing	Beijing	North	Male	25 y～	6 (5, 7)	5 (4, 6)	2 (2, 3)	13 (12, 15)	0 (0, 0)	0 (0, 0)	0 (0, 0)	0 (0, 0)	0 (0, 0)	0 (0, 0)	0 (0, 0)	0 (0, 1)	1 (0, 1)	0 (0, 1)	0 (0, 0)	1 (1, 1)	0 (0, 0)	0 (0, 0)	0 (0, 0)	0 (0, 0)	2 (2, 2)	2 (2, 2)	1 (1, 1)	5 (4, 5)	9 (8, 10)	8 (7, 9)	4 (3, 4)	20 (17, 23)
Beijing	Beijing	North	Male	30 y～	8 (7, 9)	7 (6, 7)	3 (3, 3)	17 (15, 19)	0 (0, 0)	0 (0, 0)	0 (0, 0)	0 (0, 0)	1 (0, 1)	0 (0, 0)	0 (0, 0)	1 (1, 1)	1 (0, 1)	0 (0, 1)	0 (0, 0)	1 (1, 2)	0 (0, 0)	0 (0, 0)	0 (0, 0)	1 (1, 1)	5 (4, 5)	4 (4, 5)	2 (2, 2)	11 (10, 12)	14 (12, 16)	12 (10, 13)	6 (5, 6)	32 (27, 36)
Beijing	Beijing	North	Male	35 y～	21 (18, 23)	18 (15, 19)	8 (7, 9)	47 (40, 51)	0 (0, 0)	0 (0, 0)	0 (0, 0)	0 (0, 0)	2 (1, 2)	1 (1, 2)	1 (0, 1)	4 (3, 5)	1 (1, 2)	1 (1, 1)	0 (0, 1)	3 (2, 4)	1 (1, 1)	0 (0, 1)	0 (0, 0)	1 (1, 1)	10 (9, 11)	9 (8, 10)	4 (4, 5)	23 (20, 26)	35 (30, 39)	30 (25, 33)	14 (12, 15)	78 (67, 87)
Beijing	Beijing	North	Male	40 y～	31 (27, 34)	27 (23, 29)	12 (11, 14)	70 (60, 77)	0 (0, 0)	0 (0, 0)	0 (0, 0)	0 (0, 0)	4 (3, 5)	3 (2, 4)	1 (1, 2)	8 (6, 10)	2 (2, 3)	2 (1, 2)	1 (1, 1)	5 (4, 6)	1 (1, 1)	1 (1, 1)	0 (0, 0)	2 (2, 2)	17 (15, 19)	15 (13, 16)	7 (6, 8)	39 (34, 43)	55 (47, 62)	47 (40, 52)	22 (19, 24)	124 (106, 138)
Beijing	Beijing	North	Male	45 y～	52 (45, 57)	42 (36, 46)	22 (19, 24)	116 (99, 127)	1 (1, 1)	1 (0, 1)	0 (0, 0)	2 (1, 2)	10 (8, 12)	7 (5, 8)	4 (3, 5)	21 (16, 25)	3 (3, 4)	2 (2, 3)	1 (1, 2)	7 (5, 9)	2 (2, 2)	1 (1, 2)	1 (1, 1)	4 (4, 5)	33 (29, 37)	26 (23, 29)	14 (12, 16)	73 (64, 82)	101 (86, 113)	79 (67, 88)	43 (36, 48)	223 (189, 250)
Beijing	Beijing	North	Male	50 y～	54 (46, 59)	43 (37, 47)	23 (20, 25)	120 (102, 132)	1 (1, 2)	1 (1, 1)	1 (0, 1)	3 (3, 4)	17 (13, 20)	11 (9, 14)	7 (5, 8)	35 (26, 43)	4 (3, 5)	3 (2, 4)	2 (1, 2)	9 (7, 11)	3 (2, 3)	2 (1, 2)	1 (1, 1)	5 (4, 6)	34 (29, 38)	27 (23, 30)	14 (12, 16)	75 (65, 84)	112 (94, 127)	87 (73, 98)	47 (40, 54)	246 (207, 278)
Beijing	Beijing	North	Male	55 y～	96 (82, 106)	77 (66, 85)	41 (35, 45)	215 (183, 236)	3 (2, 3)	2 (2, 2)	1 (1, 1)	6 (5, 7)	44 (34, 54)	30 (23, 37)	18 (14, 22)	92 (70, 113)	8 (6, 9)	5 (4, 6)	3 (2, 4)	16 (12, 20)	5 (4, 5)	3 (3, 4)	2 (2, 2)	10 (8, 11)	58 (50, 65)	46 (40, 52)	25 (21, 28)	128 (111, 145)	214 (178, 243)	163 (136, 186)	90 (75, 102)	467 (389, 531)
Beijing	Beijing	North	Male	60 y～	82 (69, 90)	68 (57, 75)	34 (29, 38)	184 (155, 203)	6 (5, 7)	4 (3, 4)	2 (2, 3)	12 (10, 14)	54 (41, 66)	34 (26, 41)	21 (16, 26)	109 (83, 133)	10 (8, 13)	6 (5, 8)	4 (3, 5)	20 (15, 25)	4 (4, 5)	3 (2, 3)	2 (1, 2)	9 (7, 10)	55 (47, 62)	45 (39, 51)	23 (19, 26)	123 (105, 139)	211 (173, 242)	160 (132, 183)	86 (71, 99)	456 (376, 524)
Beijing	Beijing	North	Male	65 y～	87 (73, 96)	72 (61, 80)	36 (30, 40)	195 (164, 216)	10 (8, 11)	6 (5, 7)	4 (3, 4)	20 (16, 23)	63 (47, 76)	39 (30, 48)	25 (19, 30)	126 (96, 154)	12 (9, 15)	7 (6, 9)	5 (4, 6)	24 (18, 30)	5 (4, 6)	3 (3, 4)	2 (2, 2)	10 (8, 11)	57 (49, 65)	48 (41, 54)	24 (20, 27)	129 (111, 147)	233 (191, 269)	176 (145, 202)	95 (78, 110)	504 (413, 581)
Beijing	Beijing	North	Male	70 y～	115 (94, 132)	96 (78, 109)	48 (39, 55)	259 (211, 296)	24 (20, 27)	15 (12, 17)	9 (8, 11)	48 (40, 56)	91 (69, 111)	57 (43, 70)	36 (27, 44)	184 (140, 225)	21 (16, 26)	13 (10, 17)	8 (6, 10)	42 (32, 53)	7 (6, 8)	5 (4, 5)	3 (2, 3)	15 (12, 17)	98 (84, 110)	81 (70, 91)	41 (35, 46)	220 (189, 246)	356 (289, 415)	267 (218, 310)	145 (118, 169)	768 (624, 893)
Beijing	Beijing	North	Male	75 y～	142 (116, 163)	118 (96, 135)	59 (48, 68)	320 (260, 366)	39 (33, 45)	25 (20, 29)	15 (13, 18)	79 (66, 92)	89 (68, 109)	56 (43, 69)	35 (27, 43)	181 (137, 221)	36 (28, 46)	23 (17, 29)	14 (11, 18)	73 (56, 93)	9 (8, 11)	6 (5, 7)	4 (3, 4)	19 (16, 22)	118 (101, 132)	98 (84, 110)	49 (42, 55)	264 (226, 297)	434 (352, 507)	325 (265, 378)	176 (143, 206)	936 (760, 1091)
Beijing	Beijing	North	Male	80 y～	121 (98, 139)	102 (83, 117)	50 (40, 57)	273 (221, 313)	37 (31, 43)	31 (26, 36)	15 (13, 18)	83 (70, 97)	48 (37, 59)	40 (30, 49)	20 (15, 24)	108 (82, 132)	39 (30, 49)	32 (25, 40)	16 (12, 20)	86 (67, 109)	7 (5, 7)	5 (4, 6)	3 (2, 3)	15 (12, 17)	90 (77, 101)	76 (65, 85)	37 (32, 42)	203 (173, 228)	342 (278, 399)	285 (232, 333)	140 (114, 164)	768 (624, 895)
Beijing	Beijing	North	Male	85 y～	156 (126, 180)	131 (106, 151)	64 (52, 74)	352 (284, 405)	61 (51, 70)	50 (42, 58)	25 (21, 29)	135 (114, 157)	37 (28, 45)	31 (23, 37)	15 (11, 18)	83 (63, 101)	87 (67, 109)	71 (55, 90)	35 (27, 45)	193 (149, 243)	9 (7, 10)	7 (6, 8)	4 (3, 4)	20 (16, 23)	89 (75, 100)	75 (63, 84)	37 (31, 41)	200 (170, 226)	439 (354, 516)	365 (295, 429)	180 (145, 211)	983 (795, 1156)
Beijing	Beijing	North	Female	0 y～	0 (0, 0)	0 (0, 0)	0 (0, 0)	0 (0, 0)	0 (0, 0)	0 (0, 0)	0 (0, 0)	0 (0, 0)	0 (0, 0)	0 (0, 0)	0 (0, 0)	0 (0, 0)	0 (0, 0)	0 (0, 0)	0 (0, 0)	1 (0, 1)	0 (0, 0)	0 (0, 0)	0 (0, 0)	0 (0, 0)	0 (0, 0)	0 (0, 0)	0 (0, 0)	0 (0, 0)	0 (0, 0)	0 (0, 0)	0 (0, 0)	1 (0, 1)
Beijing	Beijing	North	Female	1 y～	0 (0, 0)	0 (0, 0)	0 (0, 0)	0 (0, 0)	0 (0, 0)	0 (0, 0)	0 (0, 0)	0 (0, 0)	0 (0, 0)	0 (0, 0)	0 (0, 0)	0 (0, 0)	1 (1, 1)	0 (0, 1)	0 (0, 0)	1 (1, 2)	0 (0, 0)	0 (0, 0)	0 (0, 0)	0 (0, 0)	0 (0, 0)	0 (0, 0)	0 (0, 0)	0 (0, 0)	1 (1, 1)	1 (0, 1)	0 (0, 0)	2 (1, 2)
Beijing	Beijing	North	Female	5 y～	0 (0, 0)	0 (0, 0)	0 (0, 0)	0 (0, 0)	0 (0, 0)	0 (0, 0)	0 (0, 0)	0 (0, 0)	0 (0, 0)	0 (0, 0)	0 (0, 0)	0 (0, 0)	0 (0, 0)	0 (0, 0)	0 (0, 0)	1 (0, 1)	0 (0, 0)	0 (0, 0)	0 (0, 0)	0 (0, 0)	0 (0, 0)	0 (0, 0)	0 (0, 0)	0 (0, 0)	0 (0, 0)	0 (0, 0)	0 (0, 0)	1 (1, 1)
Beijing	Beijing	North	Female	10 y～	0 (0, 0)	0 (0, 0)	0 (0, 0)	0 (0, 0)	0 (0, 0)	0 (0, 0)	0 (0, 0)	0 (0, 0)	0 (0, 0)	0 (0, 0)	0 (0, 0)	0 (0, 0)	0 (0, 0)	0 (0, 0)	0 (0, 0)	0 (0, 1)	0 (0, 0)	0 (0, 0)	0 (0, 0)	0 (0, 0)	0 (0, 0)	0 (0, 0)	0 (0, 0)	1 (1, 1)	1 (0, 1)	1 (0, 1)	0 (0, 0)	1 (1, 1)
Beijing	Beijing	North	Female	15 y～	0 (0, 0)	0 (0, 0)	0 (0, 0)	1 (1, 1)	0 (0, 0)	0 (0, 0)	0 (0, 0)	0 (0, 0)	0 (0, 0)	0 (0, 0)	0 (0, 0)	0 (0, 0)	0 (0, 0)	0 (0, 0)	0 (0, 0)	0 (0, 0)	0 (0, 0)	0 (0, 0)	0 (0, 0)	0 (0, 0)	1 (1, 1)	1 (1, 1)	0 (0, 0)	2 (1, 2)	1 (1, 1)	1 (1, 2)	0 (0, 0)	3 (3, 3)
Beijing	Beijing	North	Female	20 y～	1 (0, 1)	1 (1, 1)	0 (0, 0)	1 (1, 2)	0 (0, 0)	0 (0, 0)	0 (0, 0)	0 (0, 0)	0 (0, 0)	0 (0, 0)	0 (0, 0)	0 (0, 0)	0 (0, 0)	0 (0, 1)	0 (0, 0)	1 (1, 1)	0 (0, 0)	0 (0, 0)	0 (0, 0)	0 (0, 0)	1 (1, 1)	1 (1, 1)	0 (0, 0)	2 (2, 2)	2 (2, 2)	2 (2, 3)	1 (0, 1)	5 (4, 6)
Beijing	Beijing	North	Female	25 y～	1 (1, 1)	2 (1, 2)	0 (0, 0)	3 (3, 3)	0 (0, 0)	0 (0, 0)	0 (0, 0)	0 (0, 0)	0 (0, 0)	0 (0, 1)	0 (0, 0)	1 (1, 1)	0 (0, 0)	1 (0, 1)	0 (0, 0)	1 (1, 1)	0 (0, 0)	0 (0, 0)	0 (0, 0)	0 (0, 0)	1 (1, 1)	1 (1, 1)	0 (0, 0)	2 (2, 2)	3 (2, 3)	3 (3, 4)	1 (1, 1)	7 (6, 8)
Beijing	Beijing	North	Female	30 y～	2 (2, 2)	2 (2, 3)	1 (0, 1)	5 (4, 6)	0 (0, 0)	0 (0, 0)	0 (0, 0)	0 (0, 0)	1 (0, 1)	1 (1, 1)	0 (0, 0)	1 (1, 2)	0 (0, 0)	0 (0, 0)	0 (0, 0)	0 (0, 0)	0 (0, 0)	0 (0, 0)	0 (0, 0)	0 (0, 1)	1 (1, 1)	1 (1, 2)	0 (0, 0)	3 (3, 3)	4 (3, 5)	5 (4, 6)	1 (1, 1)	10 (9, 11)
Beijing	Beijing	North	Female	35 y～	3 (2, 3)	3 (3, 3)	1 (1, 1)	6 (5, 7)	0 (0, 0)	0 (0, 0)	0 (0, 0)	0 (0, 0)	1 (1, 2)	2 (1, 2)	0 (0, 0)	4 (3, 5)	0 (0, 0)	1 (0, 1)	0 (0, 0)	1 (1, 1)	0 (0, 0)	0 (0, 0)	0 (0, 0)	0 (0, 0)	2 (2, 2)	2 (2, 3)	1 (0, 1)	5 (4, 6)	7 (6, 7)	8 (7, 10)	2 (1, 2)	17 (14, 19)
Beijing	Beijing	North	Female	40 y～	6 (5, 6)	7 (6, 7)	1 (1, 2)	14 (12, 15)	0 (0, 0)	0 (0, 0)	0 (0, 0)	0 (0, 0)	2 (2, 3)	4 (3, 4)	1 (1, 1)	7 (5, 8)	1 (0, 1)	1 (1, 1)	0 (0, 0)	2 (1, 2)	0 (0, 0)	0 (0, 0)	0 (0, 0)	0 (0, 1)	4 (3, 4)	4 (4, 5)	1 (1, 1)	9 (8, 10)	13 (10, 14)	16 (13, 18)	3 (3, 4)	32 (26, 36)
Beijing	Beijing	North	Female	45 y～	10 (8, 10)	11 (9, 12)	3 (2, 3)	23 (20, 25)	0 (0, 0)	0 (0, 0)	0 (0, 0)	1 (1, 1)	4 (3, 5)	7 (5, 8)	1 (1, 2)	13 (10, 15)	1 (1, 2)	2 (2, 3)	0 (0, 1)	4 (3, 5)	0 (0, 1)	1 (1, 1)	0 (0, 0)	1 (1, 1)	7 (6, 8)	9 (7, 10)	2 (2, 2)	18 (16, 20)	23 (20, 27)	30 (25, 34)	7 (6, 8)	60 (50, 68)
Beijing	Beijing	North	Female	50 y～	12 (10, 13)	13 (11, 15)	3 (3, 3)	28 (24, 31)	0 (0, 1)	1 (1, 1)	0 (0, 0)	1 (1, 1)	6 (4, 7)	9 (7, 11)	2 (1, 2)	17 (13, 20)	1 (1, 1)	1 (1, 2)	0 (0, 0)	3 (2, 3)	1 (0, 1)	1 (1, 1)	0 (0, 0)	2 (1, 2)	10 (9, 11)	11 (10, 13)	3 (2, 3)	24 (21, 27)	29 (24, 33)	37 (31, 42)	8 (7, 9)	74 (62, 85)
Beijing	Beijing	North	Female	55 y～	21 (18, 23)	24 (21, 27)	6 (5, 6)	51 (43, 56)	1 (1, 1)	1 (1, 1)	0 (0, 0)	2 (2, 2)	12 (9, 14)	18 (14, 22)	4 (3, 5)	33 (25, 41)	2 (1, 2)	3 (2, 4)	1 (0, 1)	6 (4, 7)	2 (1, 2)	2 (2, 3)	0 (0, 1)	4 (4, 5)	18 (15, 20)	21 (18, 23)	5 (4, 5)	43 (37, 49)	54 (45, 62)	69 (57, 80)	15 (13, 18)	139 (115, 159)
Beijing	Beijing	North	Female	60 y～	27 (23, 30)	32 (27, 36)	7 (6, 8)	66 (56, 73)	1 (1, 2)	2 (2, 3)	0 (0, 1)	4 (3, 5)	12 (9, 15)	19 (15, 23)	4 (3, 5)	36 (27, 43)	3 (2, 4)	5 (4, 6)	1 (1, 1)	9 (7, 11)	2 (1, 2)	3 (2, 3)	1 (0, 1)	5 (4, 6)	20 (17, 23)	24 (20, 27)	5 (4, 6)	49 (42, 55)	66 (54, 75)	85 (70, 98)	18 (15, 21)	168 (139, 193)
Beijing	Beijing	North	Female	65 y～	37 (31, 41)	44 (37, 49)	10 (8, 11)	91 (76, 100)	3 (2, 3)	4 (4, 5)	1 (1, 1)	8 (7, 9)	16 (12, 19)	24 (18, 30)	5 (4, 6)	45 (34, 55)	4 (3, 5)	6 (5, 7)	1 (1, 1)	11 (9, 14)	3 (2, 3)	4 (3, 5)	1 (1, 1)	8 (6, 9)	27 (23, 31)	32 (28, 37)	7 (6, 8)	67 (57, 76)	89 (74, 102)	115 (95, 133)	24 (20, 28)	229 (189, 263)
Beijing	Beijing	North	Female	70 y～	73 (60, 83)	87 (71, 99)	19 (15, 22)	179 (146, 204)	7 (6, 8)	11 (9, 13)	2 (2, 3)	21 (17, 24)	24 (18, 29)	37 (28, 45)	7 (6, 9)	68 (52, 83)	9 (7, 11)	13 (10, 17)	3 (2, 3)	25 (19, 31)	5 (4, 6)	8 (6, 9)	2 (1, 2)	15 (12, 17)	56 (48, 62)	67 (57, 75)	14 (12, 16)	137 (118, 153)	174 (143, 200)	223 (183, 258)	47 (39, 54)	444 (364, 512)
Beijing	Beijing	North	Female	75 y～	106 (86, 121)	127 (103, 145)	28 (22, 32)	260 (212, 298)	12 (10, 14)	18 (16, 21)	4 (3, 4)	34 (29, 39)	28 (21, 34)	43 (33, 52)	8 (6, 10)	79 (60, 96)	13 (10, 17)	20 (16, 26)	4 (3, 5)	38 (29, 47)	7 (6, 8)	11 (9, 12)	2 (2, 2)	19 (16, 22)	75 (65, 85)	90 (77, 101)	20 (17, 22)	185 (158, 208)	241 (198, 278)	309 (253, 358)	65 (53, 75)	615 (504, 711)
Beijing	Beijing	North	Female	80 y～	106 (86, 123)	125 (101, 144)	28 (23, 33)	260 (210, 299)	18 (15, 21)	22 (18, 25)	6 (5, 6)	45 (37, 52)	23 (18, 29)	29 (22, 35)	7 (6, 9)	60 (45, 73)	21 (16, 27)	26 (20, 33)	7 (5, 8)	54 (41, 69)	7 (6, 8)	8 (7, 10)	2 (2, 2)	17 (14, 20)	68 (58, 77)	80 (68, 90)	18 (15, 20)	166 (141, 187)	243 (198, 283)	290 (235, 338)	68 (55, 80)	601 (488, 701)
Beijing	Beijing	North	Female	85 y～	193 (155, 223)	226 (182, 262)	52 (41, 60)	471 (378, 546)	40 (34, 47)	50 (41, 58)	13 (11, 15)	103 (86, 120)	23 (17, 28)	28 (21, 34)	7 (5, 9)	58 (44, 71)	62 (47, 78)	76 (58, 96)	19 (15, 25)	157 (119, 199)	10 (8, 12)	13 (10, 15)	3 (3, 4)	27 (21, 31)	99 (84, 113)	117 (99, 132)	27 (22, 30)	243 (205, 275)	427 (345, 502)	510 (411, 598)	121 (97, 142)	1058 (853, 1242)
Tianjin	Tianjin	North	Male	0 y～	0 (0, 0)	0 (0, 0)	0 (0, 0)	0 (0, 0)	0 (0, 0)	0 (0, 0)	0 (0, 0)	0 (0, 0)	0 (0, 0)	0 (0, 0)	0 (0, 0)	0 (0, 0)	1 (1, 1)	1 (1, 1)	0 (0, 0)	2 (2, 3)	0 (0, 0)	0 (0, 0)	0 (0, 0)	0 (0, 0)	0 (0, 0)	0 (0, 0)	0 (0, 0)	0 (0, 0)	1 (1, 1)	1 (1, 1)	0 (0, 0)	2 (2, 3)
Tianjin	Tianjin	North	Male	1 y～	0 (0, 0)	0 (0, 0)	0 (0, 0)	0 (0, 0)	0 (0, 0)	0 (0, 0)	0 (0, 0)	0 (0, 0)	0 (0, 0)	0 (0, 0)	0 (0, 0)	0 (0, 0)	1 (1, 1)	1 (1, 1)	0 (0, 0)	2 (1, 2)	0 (0, 0)	0 (0, 0)	0 (0, 0)	0 (0, 0)	0 (0, 0)	0 (0, 0)	0 (0, 0)	0 (0, 0)	1 (1, 1)	1 (1, 1)	0 (0, 0)	2 (1, 2)
Tianjin	Tianjin	North	Male	5 y～	0 (0, 0)	0 (0, 0)	0 (0, 0)	0 (0, 0)	0 (0, 0)	0 (0, 0)	0 (0, 0)	0 (0, 0)	0 (0, 0)	0 (0, 0)	0 (0, 0)	0 (0, 0)	1 (0, 1)	0 (0, 1)	0 (0, 0)	1 (1, 2)	0 (0, 0)	0 (0, 0)	0 (0, 0)	0 (0, 0)	0 (0, 0)	0 (0, 0)	0 (0, 0)	0 (0, 0)	1 (1, 1)	1 (1, 1)	0 (0, 0)	2 (1, 2)
Tianjin	Tianjin	North	Male	10 y～	0 (0, 0)	0 (0, 0)	0 (0, 0)	0 (0, 0)	0 (0, 0)	0 (0, 0)	0 (0, 0)	0 (0, 0)	0 (0, 0)	0 (0, 0)	0 (0, 0)	0 (0, 0)	0 (0, 0)	0 (0, 0)	0 (0, 0)	1 (0, 1)	0 (0, 0)	0 (0, 0)	0 (0, 0)	0 (0, 0)	0 (0, 0)	0 (0, 0)	0 (0, 0)	1 (1, 1)	1 (1, 1)	1 (1, 1)	0 (0, 0)	2 (1, 2)
Tianjin	Tianjin	North	Male	15 y～	1 (1, 1)	1 (1, 1)	0 (0, 0)	2 (1, 2)	0 (0, 0)	0 (0, 0)	0 (0, 0)	0 (0, 0)	0 (0, 0)	0 (0, 0)	0 (0, 0)	0 (0, 0)	0 (0, 0)	0 (0, 0)	0 (0, 0)	1 (1, 1)	0 (0, 0)	0 (0, 0)	0 (0, 0)	0 (0, 0)	1 (1, 1)	1 (1, 1)	0 (0, 0)	2 (2, 2)	2 (2, 3)	2 (2, 2)	1 (1, 1)	5 (4, 6)
Tianjin	Tianjin	North	Male	20 y～	3 (2, 3)	2 (2, 2)	1 (1, 1)	5 (5, 6)	0 (0, 0)	0 (0, 0)	0 (0, 0)	0 (0, 0)	0 (0, 0)	0 (0, 0)	0 (0, 0)	1 (1, 1)	2 (1, 2)	1 (1, 1)	0 (0, 1)	3 (3, 4)	0 (0, 0)	0 (0, 0)	0 (0, 0)	0 (0, 0)	1 (1, 1)	1 (1, 1)	0 (0, 0)	3 (3, 3)	6 (5, 7)	5 (4, 5)	2 (2, 2)	12 (11, 14)
Tianjin	Tianjin	North	Male	25 y～	5 (5, 6)	4 (4, 5)	2 (1, 2)	11 (10, 12)	0 (0, 0)	0 (0, 0)	0 (0, 0)	0 (0, 0)	0 (0, 0)	0 (0, 0)	0 (0, 0)	0 (0, 1)	1 (0, 1)	0 (0, 1)	0 (0, 0)	1 (1, 2)	0 (0, 0)	0 (0, 0)	0 (0, 0)	0 (0, 0)	2 (2, 2)	1 (1, 2)	1 (1, 1)	4 (3, 4)	8 (7, 9)	6 (6, 7)	2 (2, 3)	17 (15, 19)
Tianjin	Tianjin	North	Male	30 y～	7 (6, 7)	5 (5, 6)	2 (2, 2)	14 (12, 16)	0 (0, 0)	0 (0, 0)	0 (0, 0)	0 (0, 0)	0 (0, 1)	0 (0, 0)	0 (0, 0)	1 (1, 1)	1 (1, 1)	1 (0, 1)	0 (0, 0)	1 (1, 2)	0 (0, 0)	0 (0, 0)	0 (0, 0)	0 (0, 1)	4 (4, 4)	3 (3, 4)	1 (1, 1)	9 (8, 9)	12 (11, 13)	10 (9, 11)	4 (3, 4)	26 (22, 29)
Tianjin	Tianjin	North	Male	35 y～	19 (16, 20)	15 (13, 17)	6 (5, 6)	40 (35, 44)	0 (0, 0)	0 (0, 0)	0 (0, 0)	0 (0, 0)	2 (1, 2)	1 (1, 2)	0 (0, 1)	3 (3, 4)	2 (1, 2)	1 (1, 1)	0 (0, 1)	3 (3, 4)	1 (0, 1)	0 (0, 0)	0 (0, 0)	1 (1, 1)	8 (7, 9)	7 (6, 8)	3 (2, 3)	18 (16, 20)	31 (27, 35)	25 (22, 28)	10 (8, 11)	66 (57, 73)
Tianjin	Tianjin	North	Male	40 y～	29 (26, 32)	24 (21, 26)	9 (8, 10)	63 (55, 68)	0 (0, 0)	0 (0, 0)	0 (0, 0)	0 (0, 0)	4 (3, 5)	3 (2, 3)	1 (1, 1)	8 (6, 9)	3 (2, 4)	2 (2, 3)	1 (1, 1)	6 (5, 7)	1 (1, 1)	1 (1, 1)	0 (0, 0)	2 (1, 2)	15 (13, 17)	12 (11, 14)	5 (4, 5)	32 (28, 35)	52 (45, 58)	42 (36, 47)	16 (14, 18)	110 (94, 122)
Tianjin	Tianjin	North	Male	45 y～	51 (44, 55)	38 (33, 41)	18 (15, 19)	106 (92, 116)	1 (1, 1)	0 (0, 1)	0 (0, 0)	1 (1, 2)	10 (8, 12)	6 (5, 8)	3 (3, 4)	20 (15, 24)	4 (3, 5)	3 (2, 3)	1 (1, 2)	9 (7, 11)	2 (2, 2)	1 (1, 1)	1 (1, 1)	4 (3, 4)	29 (26, 33)	22 (19, 24)	10 (9, 11)	61 (54, 68)	97 (83, 109)	70 (60, 78)	34 (29, 38)	201 (172, 224)
Tianjin	Tianjin	North	Male	50 y～	58 (50, 63)	43 (37, 47)	20 (18, 22)	122 (105, 133)	2 (1, 2)	1 (1, 1)	0 (0, 1)	3 (3, 3)	19 (14, 23)	12 (9, 15)	6 (5, 7)	37 (28, 45)	6 (5, 7)	4 (3, 5)	2 (2, 2)	12 (9, 15)	3 (2, 3)	2 (1, 2)	1 (1, 1)	5 (4, 6)	33 (29, 37)	25 (22, 28)	12 (10, 13)	70 (61, 78)	120 (101, 135)	86 (73, 97)	41 (35, 47)	248 (209, 279)
Tianjin	Tianjin	North	Male	55 y～	109 (93, 119)	81 (69, 88)	38 (33, 42)	227 (195, 248)	3 (3, 4)	2 (2, 2)	1 (1, 1)	6 (5, 7)	52 (39, 63)	33 (25, 40)	17 (13, 21)	102 (77, 124)	11 (9, 14)	7 (6, 9)	4 (3, 5)	22 (17, 27)	5 (4, 6)	3 (3, 4)	2 (1, 2)	10 (8, 11)	60 (52, 67)	44 (38, 50)	21 (18, 23)	125 (108, 140)	240 (200, 272)	170 (143, 192)	82 (69, 93)	492 (411, 557)
Tianjin	Tianjin	North	Male	60 y～	94 (80, 103)	73 (63, 81)	31 (27, 34)	199 (170, 218)	7 (6, 8)	4 (3, 5)	2 (2, 2)	13 (11, 15)	64 (48, 78)	39 (30, 48)	19 (15, 23)	123 (93, 149)	15 (12, 19)	9 (7, 12)	5 (4, 6)	29 (23, 36)	5 (4, 5)	3 (2, 3)	1 (1, 2)	9 (7, 10)	57 (50, 65)	45 (39, 51)	19 (17, 22)	121 (105, 137)	242 (200, 277)	174 (145, 198)	77 (64, 89)	493 (408, 564)
Tianjin	Tianjin	North	Male	65 y～	93 (80, 103)	73 (62, 80)	31 (27, 34)	197 (168, 217)	10 (8, 11)	6 (5, 7)	3 (2, 3)	19 (16, 22)	70 (53, 85)	43 (32, 52)	21 (16, 25)	133 (101, 162)	17 (13, 21)	10 (8, 13)	5 (4, 6)	32 (25, 40)	5 (4, 6)	3 (3, 4)	2 (1, 2)	10 (8, 11)	57 (49, 64)	44 (38, 50)	19 (16, 21)	120 (103, 136)	251 (207, 289)	180 (149, 206)	80 (66, 92)	511 (422, 587)
Tianjin	Tianjin	North	Male	70 y～	99 (82, 113)	78 (64, 88)	33 (27, 37)	210 (173, 238)	19 (16, 22)	12 (10, 14)	6 (5, 7)	37 (31, 43)	81 (62, 99)	50 (38, 61)	24 (18, 30)	156 (118, 190)	24 (19, 30)	15 (11, 18)	7 (6, 9)	46 (36, 57)	6 (5, 7)	4 (3, 4)	2 (1, 2)	12 (9, 13)	78 (67, 87)	61 (53, 68)	26 (22, 29)	165 (143, 184)	308 (251, 358)	219 (179, 254)	98 (80, 114)	626 (510, 725)
Tianjin	Tianjin	North	Male	75 y～	122 (100, 138)	95 (78, 108)	41 (33, 46)	257 (211, 292)	32 (27, 37)	19 (16, 23)	9 (8, 11)	61 (51, 70)	79 (60, 96)	49 (37, 59)	24 (18, 29)	152 (115, 185)	41 (32, 51)	25 (20, 31)	12 (10, 15)	79 (61, 98)	8 (6, 9)	5 (4, 5)	2 (2, 3)	15 (12, 17)	93 (80, 104)	73 (63, 81)	31 (27, 35)	197 (169, 220)	374 (305, 435)	266 (217, 308)	119 (97, 139)	760 (619, 882)
Tianjin	Tianjin	North	Male	80 y～	113 (92, 129)	92 (75, 105)	36 (29, 41)	242 (197, 276)	33 (28, 38)	27 (23, 31)	11 (9, 13)	71 (60, 82)	47 (36, 57)	38 (29, 46)	16 (12, 19)	100 (76, 122)	48 (38, 60)	39 (31, 48)	16 (13, 20)	103 (81, 127)	6 (5, 7)	5 (4, 5)	2 (2, 2)	12 (10, 14)	78 (67, 87)	63 (54, 71)	25 (21, 28)	166 (142, 186)	325 (265, 378)	264 (215, 307)	105 (86, 123)	694 (567, 808)
Tianjin	Tianjin	North	Male	85 y～	153 (124, 175)	124 (101, 143)	49 (39, 56)	326 (264, 373)	56 (48, 65)	45 (39, 52)	19 (16, 22)	120 (102, 138)	37 (28, 45)	30 (23, 37)	12 (9, 15)	80 (61, 97)	112 (88, 139)	91 (71, 112)	37 (29, 46)	240 (189, 297)	8 (7, 9)	7 (5, 8)	3 (2, 3)	17 (14, 20)	80 (68, 91)	65 (56, 74)	26 (22, 29)	171 (146, 193)	447 (363, 524)	363 (294, 425)	145 (118, 171)	955 (775, 1119)
Tianjin	Tianjin	North	Female	0 y～	0 (0, 0)	0 (0, 0)	0 (0, 0)	0 (0, 0)	0 (0, 0)	0 (0, 0)	0 (0, 0)	0 (0, 0)	0 (0, 0)	0 (0, 0)	0 (0, 0)	0 (0, 0)	0 (0, 1)	0 (0, 0)	0 (0, 0)	1 (1, 1)	0 (0, 0)	0 (0, 0)	0 (0, 0)	0 (0, 0)	0 (0, 0)	0 (0, 0)	0 (0, 0)	0 (0, 0)	0 (0, 1)	0 (0, 0)	0 (0, 0)	1 (1, 1)
Tianjin	Tianjin	North	Female	1 y～	0 (0, 0)	0 (0, 0)	0 (0, 0)	0 (0, 0)	0 (0, 0)	0 (0, 0)	0 (0, 0)	0 (0, 0)	0 (0, 0)	0 (0, 0)	0 (0, 0)	0 (0, 0)	1 (1, 1)	1 (0, 1)	0 (0, 0)	2 (1, 2)	0 (0, 0)	0 (0, 0)	0 (0, 0)	0 (0, 0)	0 (0, 0)	0 (0, 0)	0 (0, 0)	0 (0, 0)	1 (1, 1)	1 (0, 1)	0 (0, 0)	2 (1, 2)
Tianjin	Tianjin	North	Female	5 y～	0 (0, 0)	0 (0, 0)	0 (0, 0)	0 (0, 0)	0 (0, 0)	0 (0, 0)	0 (0, 0)	0 (0, 0)	0 (0, 0)	0 (0, 0)	0 (0, 0)	0 (0, 0)	0 (0, 1)	0 (0, 0)	0 (0, 0)	1 (1, 1)	0 (0, 0)	0 (0, 0)	0 (0, 0)	0 (0, 0)	0 (0, 0)	0 (0, 0)	0 (0, 0)	0 (0, 0)	1 (0, 1)	0 (0, 0)	0 (0, 0)	1 (1, 1)
Tianjin	Tianjin	North	Female	10 y～	0 (0, 0)	0 (0, 0)	0 (0, 0)	0 (0, 0)	0 (0, 0)	0 (0, 0)	0 (0, 0)	0 (0, 0)	0 (0, 0)	0 (0, 0)	0 (0, 0)	0 (0, 0)	0 (0, 0)	0 (0, 0)	0 (0, 0)	1 (1, 1)	0 (0, 0)	0 (0, 0)	0 (0, 0)	0 (0, 0)	0 (0, 0)	0 (0, 0)	0 (0, 0)	1 (1, 1)	1 (1, 1)	1 (1, 1)	0 (0, 0)	1 (1, 2)
Tianjin	Tianjin	North	Female	15 y～	0 (0, 0)	0 (0, 0)	0 (0, 0)	1 (1, 1)	0 (0, 0)	0 (0, 0)	0 (0, 0)	0 (0, 0)	0 (0, 0)	0 (0, 0)	0 (0, 0)	0 (0, 0)	0 (0, 0)	0 (0, 0)	0 (0, 0)	0 (0, 0)	0 (0, 0)	0 (0, 0)	0 (0, 0)	0 (0, 0)	1 (1, 1)	1 (1, 1)	0 (0, 0)	1 (1, 2)	1 (1, 1)	1 (1, 1)	0 (0, 0)	3 (3, 3)
Tianjin	Tianjin	North	Female	20 y～	0 (0, 1)	1 (0, 1)	0 (0, 0)	1 (1, 1)	0 (0, 0)	0 (0, 0)	0 (0, 0)	0 (0, 0)	0 (0, 0)	0 (0, 0)	0 (0, 0)	0 (0, 0)	0 (0, 0)	0 (0, 1)	0 (0, 0)	1 (1, 1)	0 (0, 0)	0 (0, 0)	0 (0, 0)	0 (0, 0)	1 (1, 1)	1 (1, 1)	0 (0, 0)	2 (1, 2)	2 (2, 2)	2 (2, 2)	0 (0, 0)	4 (4, 5)
Tianjin	Tianjin	North	Female	25 y～	1 (1, 1)	1 (1, 1)	0 (0, 0)	2 (2, 2)	0 (0, 0)	0 (0, 0)	0 (0, 0)	0 (0, 0)	0 (0, 0)	0 (0, 0)	0 (0, 0)	1 (1, 1)	0 (0, 0)	0 (0, 1)	0 (0, 0)	1 (1, 1)	0 (0, 0)	0 (0, 0)	0 (0, 0)	0 (0, 0)	1 (0, 1)	1 (0, 1)	0 (0, 0)	1 (1, 1)	2 (2, 2)	2 (2, 3)	0 (0, 1)	5 (4, 6)
Tianjin	Tianjin	North	Female	30 y～	2 (1, 2)	2 (1, 2)	0 (0, 0)	4 (3, 4)	0 (0, 0)	0 (0, 0)	0 (0, 0)	0 (0, 0)	0 (0, 1)	1 (0, 1)	0 (0, 0)	1 (1, 1)	0 (0, 0)	0 (0, 0)	0 (0, 0)	0 (0, 0)	0 (0, 0)	0 (0, 0)	0 (0, 0)	0 (0, 0)	1 (1, 1)	1 (1, 1)	0 (0, 0)	2 (2, 2)	3 (3, 3)	3 (3, 4)	1 (1, 1)	7 (6, 8)
Tianjin	Tianjin	North	Female	35 y～	2 (2, 2)	2 (2, 2)	0 (0, 1)	5 (4, 5)	0 (0, 0)	0 (0, 0)	0 (0, 0)	0 (0, 0)	1 (1, 1)	2 (1, 2)	0 (0, 0)	3 (2, 4)	0 (0, 1)	1 (0, 1)	0 (0, 0)	1 (1, 1)	0 (0, 0)	0 (0, 0)	0 (0, 0)	0 (0, 0)	2 (1, 2)	2 (1, 2)	0 (0, 0)	4 (3, 4)	6 (5, 6)	6 (5, 7)	1 (1, 1)	13 (11, 15)
Tianjin	Tianjin	North	Female	40 y～	5 (4, 6)	5 (5, 6)	1 (1, 1)	12 (10, 13)	0 (0, 0)	0 (0, 0)	0 (0, 0)	0 (0, 0)	2 (2, 3)	3 (2, 4)	1 (0, 1)	6 (5, 7)	1 (1, 1)	1 (1, 1)	0 (0, 0)	2 (1, 2)	0 (0, 0)	0 (0, 0)	0 (0, 0)	0 (0, 0)	3 (3, 3)	3 (3, 4)	1 (1, 1)	7 (6, 8)	12 (10, 13)	13 (11, 14)	3 (2, 3)	27 (23, 31)
Tianjin	Tianjin	North	Female	45 y～	9 (8, 10)	10 (8, 11)	2 (2, 2)	21 (18, 23)	0 (0, 0)	0 (0, 0)	0 (0, 0)	1 (1, 1)	5 (4, 6)	6 (5, 8)	1 (1, 1)	12 (9, 15)	2 (2, 2)	3 (2, 3)	0 (0, 1)	5 (4, 6)	0 (0, 0)	1 (0, 1)	0 (0, 0)	1 (1, 1)	7 (6, 7)	7 (6, 8)	1 (1, 2)	15 (13, 17)	23 (19, 26)	26 (22, 30)	5 (4, 6)	55 (46, 62)
Tianjin	Tianjin	North	Female	50 y～	12 (11, 14)	13 (11, 14)	3 (2, 3)	28 (24, 30)	0 (0, 1)	1 (1, 1)	0 (0, 0)	1 (1, 1)	7 (5, 8)	9 (7, 11)	2 (1, 2)	17 (13, 21)	1 (1, 2)	2 (1, 2)	0 (0, 0)	3 (3, 4)	1 (0, 1)	1 (1, 1)	0 (0, 0)	2 (1, 2)	10 (8, 11)	10 (9, 11)	2 (2, 2)	22 (19, 24)	31 (26, 35)	35 (29, 40)	7 (6, 8)	73 (61, 83)
Tianjin	Tianjin	North	Female	55 y～	23 (19, 25)	23 (20, 26)	5 (4, 6)	51 (44, 56)	1 (1, 1)	1 (1, 1)	0 (0, 0)	2 (2, 2)	14 (10, 16)	18 (14, 22)	3 (3, 4)	35 (27, 43)	3 (2, 4)	4 (3, 5)	1 (1, 1)	7 (6, 9)	2 (1, 2)	2 (2, 3)	0 (0, 0)	4 (3, 5)	18 (15, 20)	18 (16, 20)	4 (3, 4)	40 (35, 45)	59 (49, 67)	67 (56, 77)	14 (11, 16)	140 (116, 160)
Tianjin	Tianjin	North	Female	60 y～	30 (26, 33)	31 (27, 34)	7 (6, 7)	68 (58, 75)	2 (1, 2)	2 (2, 2)	0 (0, 0)	4 (3, 5)	15 (12, 19)	19 (15, 24)	3 (3, 4)	38 (29, 46)	5 (4, 6)	6 (5, 8)	1 (1, 1)	12 (10, 15)	2 (2, 2)	2 (2, 3)	0 (0, 1)	5 (4, 6)	20 (18, 23)	21 (18, 24)	4 (4, 5)	46 (40, 52)	75 (62, 85)	83 (69, 95)	17 (14, 19)	174 (145, 199)
Tianjin	Tianjin	North	Female	65 y～	38 (32, 42)	40 (34, 44)	8 (7, 9)	86 (73, 95)	3 (2, 3)	4 (3, 4)	1 (1, 1)	7 (6, 8)	18 (13, 22)	23 (17, 27)	4 (3, 5)	44 (34, 54)	6 (4, 7)	7 (6, 9)	1 (1, 2)	14 (11, 17)	3 (2, 3)	4 (3, 4)	1 (1, 1)	7 (6, 8)	26 (22, 29)	27 (23, 30)	6 (5, 6)	58 (50, 65)	93 (77, 106)	103 (85, 118)	21 (17, 23)	216 (180, 247)
Tianjin	Tianjin	North	Female	70 y～	62 (52, 70)	65 (54, 73)	14 (11, 15)	141 (117, 159)	6 (5, 7)	8 (7, 9)	1 (1, 2)	15 (13, 18)	22 (17, 27)	28 (21, 34)	5 (4, 6)	56 (42, 68)	10 (8, 13)	13 (10, 16)	2 (2, 3)	26 (20, 32)	4 (4, 5)	6 (5, 6)	1 (1, 1)	11 (9, 13)	44 (38, 49)	46 (40, 51)	10 (8, 11)	99 (86, 111)	150 (124, 171)	165 (136, 190)	33 (27, 38)	348 (287, 400)
Tianjin	Tianjin	North	Female	75 y～	95 (79, 108)	99 (82, 113)	21 (17, 24)	216 (178, 244)	11 (9, 12)	13 (11, 16)	2 (2, 3)	27 (23, 31)	27 (21, 33)	35 (26, 42)	6 (5, 8)	68 (52, 83)	17 (13, 21)	21 (17, 26)	4 (3, 5)	42 (33, 51)	6 (5, 7)	8 (6, 9)	1 (1, 2)	15 (12, 18)	63 (54, 70)	65 (56, 73)	14 (12, 15)	141 (122, 158)	219 (181, 252)	241 (199, 278)	48 (40, 56)	509 (419, 585)
Tianjin	Tianjin	North	Female	80 y～	108 (87, 123)	112 (91, 128)	24 (19, 27)	243 (197, 279)	17 (14, 20)	19 (16, 22)	5 (4, 5)	41 (35, 47)	24 (18, 30)	28 (21, 34)	7 (5, 8)	58 (44, 71)	28 (22, 36)	32 (25, 40)	8 (6, 10)	69 (53, 86)	6 (5, 7)	7 (6, 8)	2 (1, 2)	15 (12, 18)	64 (54, 72)	66 (56, 74)	14 (12, 16)	144 (123, 162)	247 (202, 287)	264 (215, 307)	58 (48, 68)	570 (464, 663)
Tianjin	Tianjin	North	Female	85 y～	193 (156, 222)	201 (162, 231)	42 (34, 49)	436 (351, 503)	39 (33, 44)	44 (37, 50)	10 (9, 12)	93 (78, 107)	23 (18, 28)	26 (20, 32)	6 (5, 8)	56 (43, 68)	82 (63, 102)	93 (72, 116)	22 (17, 28)	196 (153, 245)	10 (8, 11)	11 (9, 13)	3 (2, 3)	23 (19, 27)	92 (78, 104)	96 (81, 108)	20 (17, 23)	208 (177, 236)	438 (355, 513)	470 (381, 551)	104 (85, 123)	1013 (821, 1186)
Baoding	Hebei	North	Male	0 y～	0 (0, 0)	0 (0, 0)	0 (0, 0)	0 (0, 0)	0 (0, 0)	0 (0, 0)	0 (0, 0)	0 (0, 0)	0 (0, 0)	0 (0, 0)	0 (0, 0)	0 (0, 0)	0 (0, 0)	0 (0, 0)	0 (0, 0)	1 (1, 1)	0 (0, 0)	0 (0, 0)	0 (0, 0)	0 (0, 0)	0 (0, 0)	0 (0, 0)	0 (0, 0)	0 (0, 0)	0 (0, 0)	0 (0, 0)	0 (0, 0)	1 (1, 1)
Baoding	Hebei	North	Male	1 y～	0 (0, 0)	0 (0, 0)	0 (0, 0)	0 (0, 0)	0 (0, 0)	0 (0, 0)	0 (0, 0)	0 (0, 0)	0 (0, 0)	0 (0, 0)	0 (0, 0)	0 (0, 0)	0 (0, 0)	0 (0, 0)	0 (0, 0)	1 (0, 1)	0 (0, 0)	0 (0, 0)	0 (0, 0)	0 (0, 0)	0 (0, 0)	0 (0, 0)	0 (0, 0)	0 (0, 0)	0 (0, 0)	0 (0, 0)	0 (0, 0)	1 (0, 1)
Baoding	Hebei	North	Male	5 y～	0 (0, 0)	0 (0, 0)	0 (0, 0)	0 (0, 0)	0 (0, 0)	0 (0, 0)	0 (0, 0)	0 (0, 0)	0 (0, 0)	0 (0, 0)	0 (0, 0)	0 (0, 0)	0 (0, 0)	0 (0, 0)	0 (0, 0)	0 (0, 0)	0 (0, 0)	0 (0, 0)	0 (0, 0)	0 (0, 0)	0 (0, 0)	0 (0, 0)	0 (0, 0)	0 (0, 0)	0 (0, 0)	0 (0, 0)	0 (0, 0)	1 (1, 1)
Baoding	Hebei	North	Male	10 y～	0 (0, 0)	0 (0, 0)	0 (0, 0)	0 (0, 0)	0 (0, 0)	0 (0, 0)	0 (0, 0)	0 (0, 0)	0 (0, 0)	0 (0, 0)	0 (0, 0)	0 (0, 0)	0 (0, 0)	0 (0, 0)	0 (0, 0)	0 (0, 0)	0 (0, 0)	0 (0, 0)	0 (0, 0)	0 (0, 0)	0 (0, 0)	0 (0, 0)	0 (0, 0)	0 (0, 0)	0 (0, 0)	0 (0, 0)	0 (0, 0)	1 (1, 1)
Baoding	Hebei	North	Male	15 y～	0 (0, 0)	0 (0, 0)	0 (0, 0)	1 (0, 1)	0 (0, 0)	0 (0, 0)	0 (0, 0)	0 (0, 0)	0 (0, 0)	0 (0, 0)	0 (0, 0)	0 (0, 0)	0 (0, 0)	0 (0, 0)	0 (0, 0)	0 (0, 0)	0 (0, 0)	0 (0, 0)	0 (0, 0)	0 (0, 0)	1 (1, 1)	0 (0, 0)	0 (0, 0)	1 (1, 1)	1 (1, 1)	1 (1, 1)	0 (0, 0)	2 (2, 2)
Baoding	Hebei	North	Male	20 y～	1 (1, 1)	0 (0, 0)	0 (0, 0)	1 (1, 1)	0 (0, 0)	0 (0, 0)	0 (0, 0)	0 (0, 0)	0 (0, 0)	0 (0, 0)	0 (0, 0)	0 (0, 0)	0 (0, 0)	0 (0, 0)	0 (0, 0)	0 (0, 0)	0 (0, 0)	0 (0, 0)	0 (0, 0)	0 (0, 0)	0 (0, 1)	0 (0, 0)	0 (0, 0)	1 (1, 1)	1 (1, 2)	1 (1, 1)	0 (0, 0)	3 (2, 3)
Baoding	Hebei	North	Male	25 y～	1 (1, 1)	1 (1, 1)	0 (0, 0)	2 (2, 2)	0 (0, 0)	0 (0, 0)	0 (0, 0)	0 (0, 0)	0 (0, 0)	0 (0, 0)	0 (0, 0)	0 (0, 0)	0 (0, 0)	0 (0, 0)	0 (0, 0)	0 (0, 0)	0 (0, 0)	0 (0, 0)	0 (0, 0)	0 (0, 0)	1 (1, 1)	0 (0, 0)	0 (0, 0)	1 (1, 1)	2 (2, 2)	1 (1, 1)	0 (0, 1)	4 (3, 4)
Baoding	Hebei	North	Male	30 y～	2 (1, 2)	1 (1, 1)	0 (0, 0)	3 (3, 3)	0 (0, 0)	0 (0, 0)	0 (0, 0)	0 (0, 0)	0 (0, 0)	0 (0, 0)	0 (0, 0)	0 (0, 0)	0 (0, 0)	0 (0, 0)	0 (0, 0)	0 (0, 0)	0 (0, 0)	0 (0, 0)	0 (0, 0)	0 (0, 0)	2 (1, 2)	1 (1, 1)	0 (0, 0)	3 (3, 3)	3 (3, 4)	2 (2, 3)	1 (1, 1)	7 (6, 7)
Baoding	Hebei	North	Male	35 y～	5 (4, 5)	3 (3, 4)	1 (1, 1)	10 (8, 10)	0 (0, 0)	0 (0, 0)	0 (0, 0)	0 (0, 0)	0 (0, 0)	0 (0, 0)	0 (0, 0)	1 (1, 1)	0 (0, 0)	0 (0, 0)	0 (0, 0)	0 (0, 0)	0 (0, 0)	0 (0, 0)	0 (0, 0)	0 (0, 0)	4 (3, 4)	2 (2, 3)	1 (1, 1)	7 (6, 8)	9 (8, 10)	6 (5, 7)	2 (2, 2)	18 (15, 20)
Baoding	Hebei	North	Male	40 y～	9 (8, 10)	6 (5, 7)	2 (2, 2)	18 (15, 19)	0 (0, 0)	0 (0, 0)	0 (0, 0)	0 (0, 0)	1 (1, 1)	1 (0, 1)	0 (0, 0)	2 (1, 2)	0 (0, 1)	0 (0, 0)	0 (0, 0)	1 (1, 1)	0 (0, 0)	0 (0, 0)	0 (0, 0)	0 (0, 0)	8 (7, 8)	5 (5, 6)	2 (2, 2)	14 (13, 16)	19 (16, 21)	13 (11, 14)	4 (4, 5)	35 (31, 39)
Baoding	Hebei	North	Male	45 y～	14 (12, 15)	9 (8, 10)	4 (3, 4)	27 (23, 29)	0 (0, 0)	0 (0, 0)	0 (0, 0)	0 (0, 0)	2 (2, 3)	1 (1, 2)	1 (0, 1)	4 (3, 5)	1 (0, 1)	0 (0, 0)	0 (0, 0)	1 (1, 1)	0 (0, 1)	0 (0, 0)	0 (0, 0)	1 (1, 1)	13 (11, 15)	8 (7, 9)	3 (3, 4)	25 (22, 27)	31 (26, 34)	19 (17, 22)	8 (7, 9)	58 (50, 64)
Baoding	Hebei	North	Male	50 y～	16 (14, 17)	10 (9, 11)	4 (3, 4)	30 (26, 32)	0 (0, 1)	0 (0, 0)	0 (0, 0)	1 (1, 1)	4 (3, 5)	3 (2, 3)	1 (1, 1)	8 (6, 9)	1 (1, 1)	0 (0, 1)	0 (0, 0)	1 (1, 2)	1 (1, 1)	0 (0, 0)	0 (0, 0)	1 (1, 1)	14 (13, 16)	9 (8, 10)	4 (3, 4)	27 (24, 31)	36 (31, 41)	23 (19, 26)	9 (8, 10)	68 (58, 76)
Baoding	Hebei	North	Male	55 y～	32 (28, 35)	21 (18, 23)	8 (7, 9)	61 (53, 67)	1 (1, 1)	1 (0, 1)	0 (0, 0)	2 (2, 2)	13 (10, 16)	8 (6, 9)	3 (2, 3)	24 (18, 29)	2 (1, 2)	1 (1, 1)	0 (0, 0)	3 (2, 4)	1 (1, 1)	1 (1, 1)	0 (0, 0)	2 (2, 3)	28 (25, 32)	18 (16, 20)	7 (6, 8)	54 (47, 60)	78 (66, 88)	49 (41, 55)	19 (16, 21)	146 (123, 164)
Baoding	Hebei	North	Male	60 y～	32 (27, 35)	21 (18, 23)	8 (7, 9)	61 (52, 66)	2 (2, 3)	1 (1, 1)	1 (0, 1)	4 (4, 5)	19 (14, 23)	9 (7, 11)	4 (3, 5)	32 (24, 39)	3 (2, 3)	1 (1, 2)	1 (0, 1)	5 (4, 6)	1 (1, 2)	1 (1, 1)	0 (0, 0)	2 (2, 3)	31 (27, 35)	21 (18, 23)	8 (7, 9)	59 (51, 67)	88 (73, 100)	54 (45, 61)	21 (18, 24)	163 (137, 186)
Baoding	Hebei	North	Male	65 y～	31 (27, 34)	21 (18, 23)	8 (7, 8)	60 (51, 65)	4 (3, 4)	2 (1, 2)	1 (1, 1)	6 (5, 7)	20 (15, 24)	10 (7, 12)	5 (4, 6)	34 (26, 42)	3 (2, 4)	1 (1, 2)	1 (1, 1)	5 (4, 6)	1 (1, 2)	1 (1, 1)	0 (0, 0)	3 (2, 3)	30 (26, 34)	20 (17, 23)	7 (6, 8)	58 (50, 66)	90 (74, 102)	54 (45, 62)	22 (18, 25)	166 (138, 189)
Baoding	Hebei	North	Male	70 y～	34 (28, 38)	22 (18, 25)	8 (7, 9)	64 (52, 72)	7 (6, 8)	3 (3, 4)	2 (1, 2)	12 (10, 14)	24 (18, 29)	12 (9, 14)	6 (4, 7)	41 (31, 50)	4 (3, 5)	2 (2, 3)	1 (1, 1)	7 (6, 9)	2 (1, 2)	1 (1, 1)	0 (0, 0)	3 (3, 4)	42 (36, 47)	28 (24, 31)	10 (9, 12)	80 (69, 90)	112 (92, 129)	68 (56, 78)	27 (22, 31)	208 (171, 239)
Baoding	Hebei	North	Male	75 y～	35 (29, 40)	23 (19, 26)	9 (7, 10)	68 (55, 76)	10 (8, 12)	5 (4, 6)	2 (2, 3)	17 (15, 20)	20 (15, 24)	10 (7, 12)	5 (4, 6)	34 (26, 42)	6 (5, 8)	3 (2, 4)	1 (1, 2)	11 (8, 13)	2 (2, 2)	1 (1, 1)	0 (0, 1)	3 (3, 4)	43 (37, 49)	29 (25, 32)	11 (9, 12)	82 (71, 92)	117 (96, 135)	71 (58, 81)	28 (23, 33)	216 (178, 248)
Baoding	Hebei	North	Male	80 y～	30 (24, 34)	20 (16, 23)	7 (6, 8)	57 (46, 65)	9 (8, 11)	7 (6, 8)	2 (2, 2)	18 (15, 21)	10 (8, 13)	8 (6, 9)	2 (2, 3)	20 (15, 25)	6 (5, 8)	5 (4, 6)	1 (1, 2)	12 (10, 16)	1 (1, 2)	1 (1, 1)	0 (0, 0)	3 (2, 3)	33 (28, 37)	22 (19, 25)	8 (7, 9)	62 (53, 70)	90 (74, 103)	63 (52, 72)	20 (17, 23)	173 (142, 199)
Baoding	Hebei	North	Male	85 y～	35 (28, 40)	24 (19, 27)	8 (7, 9)	67 (55, 77)	14 (12, 16)	10 (9, 12)	3 (2, 3)	27 (23, 31)	7 (6, 9)	5 (4, 7)	1 (1, 2)	14 (11, 17)	13 (10, 16)	10 (8, 12)	3 (2, 3)	26 (20, 32)	2 (1, 2)	1 (1, 1)	0 (0, 0)	3 (3, 4)	29 (25, 33)	20 (17, 23)	7 (6, 8)	56 (48, 64)	101 (82, 117)	71 (58, 82)	22 (18, 26)	194 (159, 225)
Baoding	Hebei	North	Female	0 y～	0 (0, 0)	0 (0, 0)	0 (0, 0)	0 (0, 0)	0 (0, 0)	0 (0, 0)	0 (0, 0)	0 (0, 0)	0 (0, 0)	0 (0, 0)	0 (0, 0)	0 (0, 0)	0 (0, 0)	0 (0, 0)	0 (0, 0)	0 (0, 0)	0 (0, 0)	0 (0, 0)	0 (0, 0)	0 (0, 0)	0 (0, 0)	0 (0, 0)	0 (0, 0)	0 (0, 0)	0 (0, 0)	0 (0, 0)	0 (0, 0)	0 (0, 0)
Baoding	Hebei	North	Female	1 y～	0 (0, 0)	0 (0, 0)	0 (0, 0)	0 (0, 0)	0 (0, 0)	0 (0, 0)	0 (0, 0)	0 (0, 0)	0 (0, 0)	0 (0, 0)	0 (0, 0)	0 (0, 0)	0 (0, 0)	0 (0, 0)	0 (0, 0)	1 (0, 1)	0 (0, 0)	0 (0, 0)	0 (0, 0)	0 (0, 0)	0 (0, 0)	0 (0, 0)	0 (0, 0)	0 (0, 0)	0 (0, 0)	0 (0, 0)	0 (0, 0)	1 (0, 1)
Baoding	Hebei	North	Female	5 y～	0 (0, 0)	0 (0, 0)	0 (0, 0)	0 (0, 0)	0 (0, 0)	0 (0, 0)	0 (0, 0)	0 (0, 0)	0 (0, 0)	0 (0, 0)	0 (0, 0)	0 (0, 0)	0 (0, 0)	0 (0, 0)	0 (0, 0)	0 (0, 0)	0 (0, 0)	0 (0, 0)	0 (0, 0)	0 (0, 0)	0 (0, 0)	0 (0, 0)	0 (0, 0)	0 (0, 0)	0 (0, 0)	0 (0, 0)	0 (0, 0)	0 (0, 0)
Baoding	Hebei	North	Female	10 y～	0 (0, 0)	0 (0, 0)	0 (0, 0)	0 (0, 0)	0 (0, 0)	0 (0, 0)	0 (0, 0)	0 (0, 0)	0 (0, 0)	0 (0, 0)	0 (0, 0)	0 (0, 0)	0 (0, 0)	0 (0, 0)	0 (0, 0)	0 (0, 0)	0 (0, 0)	0 (0, 0)	0 (0, 0)	0 (0, 0)	0 (0, 0)	0 (0, 0)	0 (0, 0)	0 (0, 0)	0 (0, 0)	0 (0, 0)	0 (0, 0)	1 (1, 1)
Baoding	Hebei	North	Female	15 y～	0 (0, 0)	0 (0, 0)	0 (0, 0)	0 (0, 0)	0 (0, 0)	0 (0, 0)	0 (0, 0)	0 (0, 0)	0 (0, 0)	0 (0, 0)	0 (0, 0)	0 (0, 0)	0 (0, 0)	0 (0, 0)	0 (0, 0)	0 (0, 0)	0 (0, 0)	0 (0, 0)	0 (0, 0)	0 (0, 0)	0 (0, 0)	0 (0, 0)	0 (0, 0)	1 (1, 1)	1 (1, 1)	1 (0, 1)	0 (0, 0)	1 (1, 1)
Baoding	Hebei	North	Female	20 y～	0 (0, 0)	0 (0, 0)	0 (0, 0)	0 (0, 0)	0 (0, 0)	0 (0, 0)	0 (0, 0)	0 (0, 0)	0 (0, 0)	0 (0, 0)	0 (0, 0)	0 (0, 0)	0 (0, 0)	0 (0, 0)	0 (0, 0)	0 (0, 0)	0 (0, 0)	0 (0, 0)	0 (0, 0)	0 (0, 0)	0 (0, 0)	0 (0, 0)	0 (0, 0)	1 (1, 1)	1 (1, 1)	1 (0, 1)	0 (0, 0)	1 (1, 1)
Baoding	Hebei	North	Female	25 y～	0 (0, 0)	0 (0, 0)	0 (0, 0)	1 (0, 1)	0 (0, 0)	0 (0, 0)	0 (0, 0)	0 (0, 0)	0 (0, 0)	0 (0, 0)	0 (0, 0)	0 (0, 0)	0 (0, 0)	0 (0, 0)	0 (0, 0)	0 (0, 0)	0 (0, 0)	0 (0, 0)	0 (0, 0)	0 (0, 0)	0 (0, 0)	0 (0, 0)	0 (0, 0)	0 (0, 1)	1 (1, 1)	1 (1, 1)	0 (0, 0)	1 (1, 2)
Baoding	Hebei	North	Female	30 y～	0 (0, 1)	0 (0, 0)	0 (0, 0)	1 (1, 1)	0 (0, 0)	0 (0, 0)	0 (0, 0)	0 (0, 0)	0 (0, 0)	0 (0, 0)	0 (0, 0)	0 (0, 0)	0 (0, 0)	0 (0, 0)	0 (0, 0)	0 (0, 0)	0 (0, 0)	0 (0, 0)	0 (0, 0)	0 (0, 0)	0 (0, 0)	0 (0, 0)	0 (0, 0)	1 (1, 1)	1 (1, 1)	1 (1, 1)	0 (0, 0)	2 (2, 2)
Baoding	Hebei	North	Female	35 y～	1 (1, 1)	1 (1, 1)	0 (0, 0)	1 (1, 2)	0 (0, 0)	0 (0, 0)	0 (0, 0)	0 (0, 0)	0 (0, 0)	0 (0, 0)	0 (0, 0)	1 (1, 1)	0 (0, 0)	0 (0, 0)	0 (0, 0)	0 (0, 0)	0 (0, 0)	0 (0, 0)	0 (0, 0)	0 (0, 0)	1 (1, 1)	1 (1, 1)	0 (0, 0)	2 (2, 2)	2 (2, 2)	2 (2, 2)	0 (0, 0)	4 (4, 5)
Baoding	Hebei	North	Female	40 y～	2 (2, 2)	2 (1, 2)	0 (0, 0)	4 (3, 4)	0 (0, 0)	0 (0, 0)	0 (0, 0)	0 (0, 0)	1 (1, 1)	1 (1, 1)	0 (0, 0)	2 (1, 2)	0 (0, 0)	0 (0, 0)	0 (0, 0)	0 (0, 0)	0 (0, 0)	0 (0, 0)	0 (0, 0)	0 (0, 0)	2 (2, 2)	2 (1, 2)	0 (0, 0)	4 (3, 4)	5 (4, 5)	4 (4, 5)	1 (1, 1)	10 (8, 11)
Baoding	Hebei	North	Female	45 y～	3 (3, 3)	3 (2, 3)	0 (0, 0)	6 (5, 7)	0 (0, 0)	0 (0, 0)	0 (0, 0)	0 (0, 0)	1 (1, 2)	1 (1, 2)	0 (0, 0)	3 (2, 4)	0 (0, 0)	0 (0, 0)	0 (0, 0)	1 (1, 1)	0 (0, 0)	0 (0, 0)	0 (0, 0)	0 (0, 0)	3 (3, 4)	3 (3, 3)	0 (0, 1)	7 (6, 8)	8 (7, 9)	8 (6, 9)	1 (1, 1)	17 (14, 19)
Baoding	Hebei	North	Female	50 y～	3 (3, 4)	3 (3, 3)	1 (0, 1)	7 (6, 8)	0 (0, 0)	0 (0, 0)	0 (0, 0)	0 (0, 0)	2 (1, 2)	2 (1, 2)	0 (0, 0)	4 (3, 5)	0 (0, 0)	0 (0, 0)	0 (0, 0)	0 (0, 1)	0 (0, 0)	0 (0, 0)	0 (0, 0)	0 (0, 0)	4 (4, 5)	4 (3, 4)	1 (1, 1)	9 (8, 10)	10 (8, 11)	9 (8, 11)	1 (1, 2)	21 (18, 24)
Baoding	Hebei	North	Female	55 y～	7 (6, 8)	6 (5, 7)	1 (1, 1)	14 (12, 15)	0 (0, 0)	0 (0, 0)	0 (0, 0)	1 (1, 1)	4 (3, 4)	4 (3, 5)	1 (0, 1)	8 (6, 10)	0 (0, 1)	1 (0, 1)	0 (0, 0)	1 (1, 1)	0 (0, 1)	1 (0, 1)	0 (0, 0)	1 (1, 1)	9 (7, 10)	8 (7, 8)	1 (1, 1)	17 (15, 20)	20 (17, 23)	19 (16, 22)	3 (3, 3)	42 (36, 48)
Baoding	Hebei	North	Female	60 y～	10 (9, 11)	9 (8, 10)	2 (1, 2)	21 (18, 23)	1 (0, 1)	1 (1, 1)	0 (0, 0)	1 (1, 2)	4 (3, 5)	5 (4, 6)	1 (1, 1)	10 (8, 12)	1 (1, 1)	1 (1, 1)	0 (0, 0)	2 (2, 2)	1 (0, 1)	1 (1, 1)	0 (0, 0)	1 (1, 2)	11 (10, 13)	10 (8, 11)	2 (1, 2)	23 (19, 25)	28 (23, 32)	26 (21, 29)	5 (4, 5)	58 (48, 66)
Baoding	Hebei	North	Female	65 y～	12 (10, 13)	10 (9, 11)	2 (2, 2)	24 (21, 27)	1 (1, 1)	1 (1, 1)	0 (0, 0)	2 (2, 3)	5 (4, 6)	5 (4, 6)	1 (1, 1)	11 (8, 13)	1 (1, 1)	1 (1, 1)	0 (0, 0)	2 (2, 3)	1 (1, 1)	1 (1, 1)	0 (0, 0)	2 (1, 2)	13 (11, 15)	11 (10, 13)	2 (2, 2)	26 (23, 30)	33 (27, 37)	30 (25, 34)	5 (4, 6)	68 (57, 77)
Baoding	Hebei	North	Female	70 y～	19 (16, 22)	16 (13, 19)	3 (2, 3)	38 (32, 44)	2 (2, 2)	2 (2, 3)	0 (0, 0)	5 (4, 5)	6 (4, 7)	6 (5, 8)	1 (1, 1)	13 (10, 16)	2 (1, 2)	2 (1, 2)	0 (0, 0)	4 (3, 5)	1 (1, 1)	1 (1, 1)	0 (0, 0)	3 (2, 3)	22 (19, 24)	19 (16, 21)	3 (3, 4)	44 (38, 49)	51 (43, 59)	47 (39, 54)	8 (7, 9)	107 (88, 122)
Baoding	Hebei	North	Female	75 y～	29 (24, 33)	25 (20, 28)	4 (4, 5)	58 (48, 66)	4 (3, 4)	4 (3, 5)	1 (1, 1)	8 (7, 9)	7 (5, 8)	8 (6, 9)	1 (1, 2)	16 (12, 20)	3 (2, 3)	3 (2, 4)	0 (0, 1)	6 (5, 7)	2 (1, 2)	2 (1, 2)	0 (0, 0)	4 (3, 4)	31 (26, 34)	26 (23, 29)	5 (4, 5)	62 (53, 69)	74 (61, 85)	67 (56, 77)	12 (10, 14)	154 (127, 176)
Baoding	Hebei	North	Female	80 y～	33 (27, 38)	28 (22, 32)	5 (4, 6)	66 (53, 75)	6 (5, 7)	5 (4, 6)	1 (1, 1)	12 (10, 14)	7 (5, 8)	6 (4, 7)	1 (1, 2)	14 (10, 17)	5 (4, 6)	4 (3, 5)	1 (1, 1)	10 (7, 12)	2 (1, 2)	2 (1, 2)	0 (0, 0)	4 (3, 4)	31 (27, 35)	26 (22, 29)	5 (4, 6)	62 (53, 70)	83 (68, 95)	70 (58, 81)	14 (12, 16)	167 (137, 192)
Baoding	Hebei	North	Female	85 y～	60 (48, 69)	50 (41, 58)	10 (8, 11)	120 (97, 137)	13 (11, 16)	12 (10, 13)	3 (2, 3)	28 (23, 32)	6 (5, 8)	6 (4, 7)	1 (1, 2)	13 (10, 16)	13 (10, 17)	12 (9, 15)	3 (2, 3)	28 (21, 35)	3 (2, 3)	2 (2, 3)	1 (0, 1)	6 (5, 7)	46 (39, 52)	38 (33, 43)	7 (6, 8)	92 (78, 104)	142 (116, 164)	120 (98, 139)	24 (20, 28)	286 (234, 331)
Cangzhou	Hebei	North	Male	0 y～	0 (0, 0)	0 (0, 0)	0 (0, 0)	0 (0, 0)	0 (0, 0)	0 (0, 0)	0 (0, 0)	0 (0, 0)	0 (0, 0)	0 (0, 0)	0 (0, 0)	0 (0, 0)	0 (0, 0)	0 (0, 0)	0 (0, 0)	0 (0, 0)	0 (0, 0)	0 (0, 0)	0 (0, 0)	0 (0, 0)	0 (0, 0)	0 (0, 0)	0 (0, 0)	0 (0, 0)	0 (0, 0)	0 (0, 0)	0 (0, 0)	0 (0, 0)
Cangzhou	Hebei	North	Male	1 y～	0 (0, 0)	0 (0, 0)	0 (0, 0)	0 (0, 0)	0 (0, 0)	0 (0, 0)	0 (0, 0)	0 (0, 0)	0 (0, 0)	0 (0, 0)	0 (0, 0)	0 (0, 0)	0 (0, 0)	0 (0, 0)	0 (0, 0)	0 (0, 0)	0 (0, 0)	0 (0, 0)	0 (0, 0)	0 (0, 0)	0 (0, 0)	0 (0, 0)	0 (0, 0)	0 (0, 0)	0 (0, 0)	0 (0, 0)	0 (0, 0)	0 (0, 0)
Cangzhou	Hebei	North	Male	5 y～	0 (0, 0)	0 (0, 0)	0 (0, 0)	0 (0, 0)	0 (0, 0)	0 (0, 0)	0 (0, 0)	0 (0, 0)	0 (0, 0)	0 (0, 0)	0 (0, 0)	0 (0, 0)	0 (0, 0)	0 (0, 0)	0 (0, 0)	0 (0, 0)	0 (0, 0)	0 (0, 0)	0 (0, 0)	0 (0, 0)	0 (0, 0)	0 (0, 0)	0 (0, 0)	0 (0, 0)	0 (0, 0)	0 (0, 0)	0 (0, 0)	0 (0, 0)
Cangzhou	Hebei	North	Male	10 y～	0 (0, 0)	0 (0, 0)	0 (0, 0)	0 (0, 0)	0 (0, 0)	0 (0, 0)	0 (0, 0)	0 (0, 0)	0 (0, 0)	0 (0, 0)	0 (0, 0)	0 (0, 0)	0 (0, 0)	0 (0, 0)	0 (0, 0)	0 (0, 0)	0 (0, 0)	0 (0, 0)	0 (0, 0)	0 (0, 0)	0 (0, 0)	0 (0, 0)	0 (0, 0)	0 (0, 0)	0 (0, 0)	0 (0, 0)	0 (0, 0)	0 (0, 0)
Cangzhou	Hebei	North	Male	15 y～	0 (0, 0)	0 (0, 0)	0 (0, 0)	0 (0, 0)	0 (0, 0)	0 (0, 0)	0 (0, 0)	0 (0, 0)	0 (0, 0)	0 (0, 0)	0 (0, 0)	0 (0, 0)	0 (0, 0)	0 (0, 0)	0 (0, 0)	0 (0, 0)	0 (0, 0)	0 (0, 0)	0 (0, 0)	0 (0, 0)	0 (0, 0)	0 (0, 0)	0 (0, 0)	0 (0, 0)	0 (0, 0)	0 (0, 0)	0 (0, 0)	0 (0, 0)
Cangzhou	Hebei	North	Male	20 y～	0 (0, 0)	0 (0, 0)	0 (0, 0)	0 (0, 0)	0 (0, 0)	0 (0, 0)	0 (0, 0)	0 (0, 0)	0 (0, 0)	0 (0, 0)	0 (0, 0)	0 (0, 0)	0 (0, 0)	0 (0, 0)	0 (0, 0)	0 (0, 0)	0 (0, 0)	0 (0, 0)	0 (0, 0)	0 (0, 0)	0 (0, 0)	0 (0, 0)	0 (0, 0)	0 (0, 0)	0 (0, 0)	0 (0, 0)	0 (0, 0)	1 (1, 1)
Cangzhou	Hebei	North	Male	25 y～	0 (0, 0)	0 (0, 0)	0 (0, 0)	0 (0, 1)	0 (0, 0)	0 (0, 0)	0 (0, 0)	0 (0, 0)	0 (0, 0)	0 (0, 0)	0 (0, 0)	0 (0, 0)	0 (0, 0)	0 (0, 0)	0 (0, 0)	0 (0, 0)	0 (0, 0)	0 (0, 0)	0 (0, 0)	0 (0, 0)	0 (0, 0)	0 (0, 0)	0 (0, 0)	0 (0, 0)	0 (0, 0)	0 (0, 0)	0 (0, 0)	1 (1, 1)
Cangzhou	Hebei	North	Male	30 y～	0 (0, 0)	0 (0, 0)	0 (0, 0)	1 (1, 1)	0 (0, 0)	0 (0, 0)	0 (0, 0)	0 (0, 0)	0 (0, 0)	0 (0, 0)	0 (0, 0)	0 (0, 0)	0 (0, 0)	0 (0, 0)	0 (0, 0)	0 (0, 0)	0 (0, 0)	0 (0, 0)	0 (0, 0)	0 (0, 0)	0 (0, 0)	0 (0, 0)	0 (0, 0)	1 (1, 1)	1 (1, 1)	1 (0, 1)	0 (0, 0)	1 (1, 2)
Cangzhou	Hebei	North	Male	35 y～	1 (1, 1)	1 (1, 1)	0 (0, 0)	2 (2, 2)	0 (0, 0)	0 (0, 0)	0 (0, 0)	0 (0, 0)	0 (0, 0)	0 (0, 0)	0 (0, 0)	0 (0, 0)	0 (0, 0)	0 (0, 0)	0 (0, 0)	0 (0, 0)	0 (0, 0)	0 (0, 0)	0 (0, 0)	0 (0, 0)	1 (1, 1)	1 (0, 1)	0 (0, 0)	1 (1, 2)	2 (1, 2)	1 (1, 1)	1 (0, 1)	4 (3, 4)
Cangzhou	Hebei	North	Male	40 y～	2 (1, 2)	1 (1, 1)	1 (0, 1)	4 (3, 4)	0 (0, 0)	0 (0, 0)	0 (0, 0)	0 (0, 0)	0 (0, 0)	0 (0, 0)	0 (0, 0)	0 (0, 0)	0 (0, 0)	0 (0, 0)	0 (0, 0)	0 (0, 0)	0 (0, 0)	0 (0, 0)	0 (0, 0)	0 (0, 0)	1 (1, 2)	1 (1, 1)	0 (0, 0)	3 (3, 3)	3 (3, 4)	3 (2, 3)	1 (1, 1)	7 (6, 8)
Cangzhou	Hebei	North	Male	45 y～	3 (2, 3)	2 (2, 2)	1 (1, 1)	5 (5, 6)	0 (0, 0)	0 (0, 0)	0 (0, 0)	0 (0, 0)	0 (0, 1)	0 (0, 0)	0 (0, 0)	1 (1, 1)	0 (0, 0)	0 (0, 0)	0 (0, 0)	0 (0, 0)	0 (0, 0)	0 (0, 0)	0 (0, 0)	0 (0, 0)	2 (2, 3)	2 (1, 2)	1 (1, 1)	5 (4, 5)	6 (5, 6)	4 (3, 4)	2 (2, 2)	12 (10, 13)
Cangzhou	Hebei	North	Male	50 y～	3 (2, 3)	2 (2, 2)	1 (1, 1)	6 (5, 6)	0 (0, 0)	0 (0, 0)	0 (0, 0)	0 (0, 0)	1 (1, 1)	0 (0, 1)	0 (0, 0)	2 (1, 2)	0 (0, 0)	0 (0, 0)	0 (0, 0)	0 (0, 0)	0 (0, 0)	0 (0, 0)	0 (0, 0)	0 (0, 0)	3 (2, 3)	2 (2, 2)	1 (1, 1)	5 (5, 6)	7 (6, 8)	5 (4, 5)	2 (2, 2)	14 (12, 15)
Cangzhou	Hebei	North	Male	55 y～	6 (5, 7)	4 (4, 5)	2 (2, 2)	12 (10, 13)	0 (0, 0)	0 (0, 0)	0 (0, 0)	0 (0, 0)	2 (2, 3)	2 (1, 2)	1 (1, 1)	5 (4, 6)	0 (0, 0)	0 (0, 0)	0 (0, 0)	1 (0, 1)	0 (0, 0)	0 (0, 0)	0 (0, 0)	0 (0, 1)	5 (5, 6)	4 (3, 4)	2 (2, 2)	11 (9, 12)	14 (12, 16)	10 (8, 11)	5 (4, 5)	29 (24, 33)
Cangzhou	Hebei	North	Male	60 y～	6 (5, 6)	4 (4, 5)	2 (2, 2)	12 (10, 13)	0 (0, 1)	0 (0, 0)	0 (0, 0)	1 (1, 1)	3 (3, 4)	2 (1, 2)	1 (1, 1)	6 (5, 8)	0 (0, 1)	0 (0, 0)	0 (0, 0)	1 (1, 1)	0 (0, 0)	0 (0, 0)	0 (0, 0)	0 (0, 1)	6 (5, 7)	4 (4, 5)	2 (2, 2)	12 (10, 13)	16 (14, 19)	11 (9, 13)	5 (4, 6)	32 (27, 37)
Cangzhou	Hebei	North	Male	65 y～	6 (5, 6)	4 (4, 5)	2 (2, 2)	12 (10, 13)	1 (1, 1)	0 (0, 0)	0 (0, 0)	1 (1, 1)	4 (3, 5)	2 (2, 2)	1 (1, 1)	7 (5, 8)	1 (0, 1)	0 (0, 0)	0 (0, 0)	1 (1, 1)	0 (0, 0)	0 (0, 0)	0 (0, 0)	1 (0, 1)	6 (5, 6)	4 (3, 5)	2 (2, 2)	11 (10, 13)	17 (14, 19)	11 (9, 13)	5 (4, 6)	33 (27, 38)
Cangzhou	Hebei	North	Male	70 y～	6 (5, 7)	5 (4, 5)	2 (2, 2)	13 (10, 14)	1 (1, 2)	1 (1, 1)	0 (0, 0)	2 (2, 3)	4 (3, 5)	2 (2, 3)	1 (1, 2)	8 (6, 10)	1 (1, 1)	0 (0, 1)	0 (0, 0)	1 (1, 2)	0 (0, 0)	0 (0, 0)	0 (0, 0)	1 (1, 1)	8 (7, 9)	6 (5, 6)	2 (2, 3)	16 (14, 18)	21 (17, 24)	14 (11, 16)	6 (5, 7)	41 (34, 47)
Cangzhou	Hebei	North	Male	75 y～	7 (5, 7)	5 (4, 5)	2 (2, 2)	13 (11, 15)	2 (2, 2)	1 (1, 1)	1 (0, 1)	3 (3, 4)	4 (3, 5)	2 (2, 2)	1 (1, 1)	7 (5, 8)	1 (1, 1)	1 (0, 1)	0 (0, 0)	2 (2, 3)	0 (0, 0)	0 (0, 0)	0 (0, 0)	1 (1, 1)	8 (7, 9)	6 (5, 7)	3 (2, 3)	16 (14, 18)	22 (18, 25)	14 (12, 17)	7 (6, 8)	43 (35, 49)
Cangzhou	Hebei	North	Male	80 y～	6 (4, 6)	4 (3, 5)	2 (1, 2)	11 (9, 13)	2 (1, 2)	1 (1, 1)	1 (1, 1)	4 (3, 4)	2 (1, 2)	1 (1, 2)	1 (1, 1)	4 (3, 5)	1 (1, 2)	1 (1, 1)	0 (0, 1)	2 (2, 3)	0 (0, 0)	0 (0, 0)	0 (0, 0)	1 (0, 1)	6 (5, 7)	4 (4, 5)	2 (2, 2)	12 (11, 14)	17 (14, 19)	12 (10, 14)	6 (5, 6)	34 (28, 40)
Cangzhou	Hebei	North	Male	85 y～	7 (5, 8)	5 (4, 6)	2 (2, 2)	13 (11, 15)	3 (2, 3)	2 (2, 2)	1 (1, 1)	5 (5, 6)	1 (1, 2)	1 (1, 1)	1 (0, 1)	3 (2, 3)	2 (2, 3)	2 (1, 2)	1 (1, 1)	5 (4, 6)	0 (0, 0)	0 (0, 0)	0 (0, 0)	1 (1, 1)	5 (5, 6)	4 (3, 5)	2 (1, 2)	11 (10, 13)	19 (15, 22)	14 (11, 16)	6 (5, 7)	39 (32, 45)
Cangzhou	Hebei	North	Female	0 y～	0 (0, 0)	0 (0, 0)	0 (0, 0)	0 (0, 0)	0 (0, 0)	0 (0, 0)	0 (0, 0)	0 (0, 0)	0 (0, 0)	0 (0, 0)	0 (0, 0)	0 (0, 0)	0 (0, 0)	0 (0, 0)	0 (0, 0)	0 (0, 0)	0 (0, 0)	0 (0, 0)	0 (0, 0)	0 (0, 0)	0 (0, 0)	0 (0, 0)	0 (0, 0)	0 (0, 0)	0 (0, 0)	0 (0, 0)	0 (0, 0)	0 (0, 0)
Cangzhou	Hebei	North	Female	1 y～	0 (0, 0)	0 (0, 0)	0 (0, 0)	0 (0, 0)	0 (0, 0)	0 (0, 0)	0 (0, 0)	0 (0, 0)	0 (0, 0)	0 (0, 0)	0 (0, 0)	0 (0, 0)	0 (0, 0)	0 (0, 0)	0 (0, 0)	0 (0, 0)	0 (0, 0)	0 (0, 0)	0 (0, 0)	0 (0, 0)	0 (0, 0)	0 (0, 0)	0 (0, 0)	0 (0, 0)	0 (0, 0)	0 (0, 0)	0 (0, 0)	0 (0, 0)
Cangzhou	Hebei	North	Female	5 y～	0 (0, 0)	0 (0, 0)	0 (0, 0)	0 (0, 0)	0 (0, 0)	0 (0, 0)	0 (0, 0)	0 (0, 0)	0 (0, 0)	0 (0, 0)	0 (0, 0)	0 (0, 0)	0 (0, 0)	0 (0, 0)	0 (0, 0)	0 (0, 0)	0 (0, 0)	0 (0, 0)	0 (0, 0)	0 (0, 0)	0 (0, 0)	0 (0, 0)	0 (0, 0)	0 (0, 0)	0 (0, 0)	0 (0, 0)	0 (0, 0)	0 (0, 0)
Cangzhou	Hebei	North	Female	10 y～	0 (0, 0)	0 (0, 0)	0 (0, 0)	0 (0, 0)	0 (0, 0)	0 (0, 0)	0 (0, 0)	0 (0, 0)	0 (0, 0)	0 (0, 0)	0 (0, 0)	0 (0, 0)	0 (0, 0)	0 (0, 0)	0 (0, 0)	0 (0, 0)	0 (0, 0)	0 (0, 0)	0 (0, 0)	0 (0, 0)	0 (0, 0)	0 (0, 0)	0 (0, 0)	0 (0, 0)	0 (0, 0)	0 (0, 0)	0 (0, 0)	0 (0, 0)
Cangzhou	Hebei	North	Female	15 y～	0 (0, 0)	0 (0, 0)	0 (0, 0)	0 (0, 0)	0 (0, 0)	0 (0, 0)	0 (0, 0)	0 (0, 0)	0 (0, 0)	0 (0, 0)	0 (0, 0)	0 (0, 0)	0 (0, 0)	0 (0, 0)	0 (0, 0)	0 (0, 0)	0 (0, 0)	0 (0, 0)	0 (0, 0)	0 (0, 0)	0 (0, 0)	0 (0, 0)	0 (0, 0)	0 (0, 0)	0 (0, 0)	0 (0, 0)	0 (0, 0)	0 (0, 0)
Cangzhou	Hebei	North	Female	20 y～	0 (0, 0)	0 (0, 0)	0 (0, 0)	0 (0, 0)	0 (0, 0)	0 (0, 0)	0 (0, 0)	0 (0, 0)	0 (0, 0)	0 (0, 0)	0 (0, 0)	0 (0, 0)	0 (0, 0)	0 (0, 0)	0 (0, 0)	0 (0, 0)	0 (0, 0)	0 (0, 0)	0 (0, 0)	0 (0, 0)	0 (0, 0)	0 (0, 0)	0 (0, 0)	0 (0, 0)	0 (0, 0)	0 (0, 0)	0 (0, 0)	0 (0, 0)
Cangzhou	Hebei	North	Female	25 y～	0 (0, 0)	0 (0, 0)	0 (0, 0)	0 (0, 0)	0 (0, 0)	0 (0, 0)	0 (0, 0)	0 (0, 0)	0 (0, 0)	0 (0, 0)	0 (0, 0)	0 (0, 0)	0 (0, 0)	0 (0, 0)	0 (0, 0)	0 (0, 0)	0 (0, 0)	0 (0, 0)	0 (0, 0)	0 (0, 0)	0 (0, 0)	0 (0, 0)	0 (0, 0)	0 (0, 0)	0 (0, 0)	0 (0, 0)	0 (0, 0)	0 (0, 0)
Cangzhou	Hebei	North	Female	30 y～	0 (0, 0)	0 (0, 0)	0 (0, 0)	0 (0, 0)	0 (0, 0)	0 (0, 0)	0 (0, 0)	0 (0, 0)	0 (0, 0)	0 (0, 0)	0 (0, 0)	0 (0, 0)	0 (0, 0)	0 (0, 0)	0 (0, 0)	0 (0, 0)	0 (0, 0)	0 (0, 0)	0 (0, 0)	0 (0, 0)	0 (0, 0)	0 (0, 0)	0 (0, 0)	0 (0, 0)	0 (0, 0)	0 (0, 0)	0 (0, 0)	0 (0, 1)
Cangzhou	Hebei	North	Female	35 y～	0 (0, 0)	0 (0, 0)	0 (0, 0)	0 (0, 0)	0 (0, 0)	0 (0, 0)	0 (0, 0)	0 (0, 0)	0 (0, 0)	0 (0, 0)	0 (0, 0)	0 (0, 0)	0 (0, 0)	0 (0, 0)	0 (0, 0)	0 (0, 0)	0 (0, 0)	0 (0, 0)	0 (0, 0)	0 (0, 0)	0 (0, 0)	0 (0, 0)	0 (0, 0)	0 (0, 0)	0 (0, 0)	0 (0, 0)	0 (0, 0)	1 (1, 1)
Cangzhou	Hebei	North	Female	40 y～	0 (0, 0)	0 (0, 0)	0 (0, 0)	1 (1, 1)	0 (0, 0)	0 (0, 0)	0 (0, 0)	0 (0, 0)	0 (0, 0)	0 (0, 0)	0 (0, 0)	0 (0, 0)	0 (0, 0)	0 (0, 0)	0 (0, 0)	0 (0, 0)	0 (0, 0)	0 (0, 0)	0 (0, 0)	0 (0, 0)	0 (0, 0)	0 (0, 0)	0 (0, 0)	1 (1, 1)	1 (1, 1)	1 (1, 1)	0 (0, 0)	2 (2, 2)
Cangzhou	Hebei	North	Female	45 y～	1 (0, 1)	1 (0, 1)	0 (0, 0)	1 (1, 1)	0 (0, 0)	0 (0, 0)	0 (0, 0)	0 (0, 0)	0 (0, 0)	0 (0, 0)	0 (0, 0)	1 (0, 1)	0 (0, 0)	0 (0, 0)	0 (0, 0)	0 (0, 0)	0 (0, 0)	0 (0, 0)	0 (0, 0)	0 (0, 0)	1 (1, 1)	1 (1, 1)	0 (0, 0)	1 (1, 2)	1 (1, 2)	2 (1, 2)	0 (0, 0)	3 (3, 4)
Cangzhou	Hebei	North	Female	50 y～	1 (1, 1)	1 (1, 1)	0 (0, 0)	1 (1, 2)	0 (0, 0)	0 (0, 0)	0 (0, 0)	0 (0, 0)	0 (0, 0)	0 (0, 0)	0 (0, 0)	1 (1, 1)	0 (0, 0)	0 (0, 0)	0 (0, 0)	0 (0, 0)	0 (0, 0)	0 (0, 0)	0 (0, 0)	0 (0, 0)	1 (1, 1)	1 (1, 1)	0 (0, 0)	2 (2, 2)	2 (2, 2)	2 (2, 2)	0 (0, 0)	4 (3, 5)
Cangzhou	Hebei	North	Female	55 y～	1 (1, 1)	1 (1, 1)	0 (0, 0)	3 (2, 3)	0 (0, 0)	0 (0, 0)	0 (0, 0)	0 (0, 0)	1 (0, 1)	1 (1, 1)	0 (0, 0)	2 (1, 2)	0 (0, 0)	0 (0, 0)	0 (0, 0)	0 (0, 0)	0 (0, 0)	0 (0, 0)	0 (0, 0)	0 (0, 0)	2 (1, 2)	2 (1, 2)	0 (0, 0)	3 (3, 4)	4 (3, 4)	4 (3, 5)	1 (1, 1)	8 (7, 10)
Cangzhou	Hebei	North	Female	60 y～	2 (2, 2)	2 (2, 2)	0 (0, 0)	4 (3, 5)	0 (0, 0)	0 (0, 0)	0 (0, 0)	0 (0, 0)	1 (1, 1)	1 (1, 1)	0 (0, 0)	2 (2, 2)	0 (0, 0)	0 (0, 0)	0 (0, 0)	0 (0, 0)	0 (0, 0)	0 (0, 0)	0 (0, 0)	0 (0, 0)	2 (2, 2)	2 (2, 2)	0 (0, 0)	4 (4, 5)	5 (4, 6)	5 (4, 6)	1 (1, 1)	12 (10, 13)
Cangzhou	Hebei	North	Female	65 y～	2 (2, 2)	2 (2, 2)	0 (0, 1)	5 (4, 5)	0 (0, 0)	0 (0, 0)	0 (0, 0)	0 (0, 1)	1 (1, 1)	1 (1, 1)	0 (0, 0)	2 (2, 3)	0 (0, 0)	0 (0, 0)	0 (0, 0)	0 (0, 1)	0 (0, 0)	0 (0, 0)	0 (0, 0)	0 (0, 0)	2 (2, 3)	2 (2, 3)	0 (0, 1)	5 (4, 6)	6 (5, 7)	6 (5, 7)	1 (1, 1)	13 (11, 15)
Cangzhou	Hebei	North	Female	70 y～	3 (3, 4)	3 (3, 4)	1 (1, 1)	8 (6, 9)	0 (0, 0)	0 (0, 1)	0 (0, 0)	1 (1, 1)	1 (1, 1)	1 (1, 2)	0 (0, 0)	3 (2, 3)	0 (0, 0)	0 (0, 0)	0 (0, 0)	1 (1, 1)	0 (0, 0)	0 (0, 0)	0 (0, 0)	1 (0, 1)	4 (3, 4)	4 (3, 4)	1 (1, 1)	9 (7, 10)	9 (8, 11)	10 (8, 11)	2 (2, 2)	21 (18, 24)
Cangzhou	Hebei	North	Female	75 y～	5 (4, 6)	5 (4, 6)	1 (1, 1)	12 (9, 13)	1 (1, 1)	1 (1, 1)	0 (0, 0)	2 (1, 2)	1 (1, 2)	2 (1, 2)	0 (0, 0)	3 (2, 4)	0 (0, 1)	1 (0, 1)	0 (0, 0)	1 (1, 1)	0 (0, 0)	0 (0, 0)	0 (0, 0)	1 (1, 1)	6 (5, 6)	5 (5, 6)	1 (1, 1)	12 (10, 14)	13 (11, 15)	14 (12, 16)	3 (2, 3)	31 (25, 35)
Cangzhou	Hebei	North	Female	80 y～	6 (5, 7)	6 (5, 7)	1 (1, 2)	13 (11, 15)	1 (1, 1)	1 (1, 1)	0 (0, 0)	2 (2, 3)	1 (1, 1)	1 (1, 1)	0 (0, 0)	3 (2, 3)	1 (1, 1)	1 (1, 1)	0 (0, 0)	2 (1, 2)	0 (0, 0)	0 (0, 0)	0 (0, 0)	1 (1, 1)	6 (5, 6)	5 (5, 6)	1 (1, 1)	12 (10, 14)	15 (12, 17)	14 (12, 17)	4 (3, 4)	33 (27, 38)
Cangzhou	Hebei	North	Female	85 y～	11 (9, 13)	10 (8, 12)	2 (2, 3)	24 (19, 27)	2 (2, 3)	2 (2, 3)	1 (1, 1)	5 (5, 6)	1 (1, 1)	1 (1, 1)	0 (0, 0)	3 (2, 3)	2 (2, 3)	2 (2, 3)	1 (1, 1)	5 (4, 7)	1 (0, 1)	0 (0, 1)	0 (0, 0)	1 (1, 1)	8 (7, 9)	8 (7, 9)	2 (2, 2)	18 (15, 20)	26 (21, 30)	24 (20, 28)	6 (5, 7)	56 (46, 65)
Chengde	Hebei	North	Male	0 y～	0 (0, 0)	0 (0, 0)	0 (0, 0)	0 (0, 0)	0 (0, 0)	0 (0, 0)	0 (0, 0)	0 (0, 0)	0 (0, 0)	0 (0, 0)	0 (0, 0)	0 (0, 0)	0 (0, 0)	0 (0, 0)	0 (0, 0)	0 (0, 0)	0 (0, 0)	0 (0, 0)	0 (0, 0)	0 (0, 0)	0 (0, 0)	0 (0, 0)	0 (0, 0)	0 (0, 0)	0 (0, 0)	0 (0, 0)	0 (0, 0)	0 (0, 0)
Chengde	Hebei	North	Male	1 y～	0 (0, 0)	0 (0, 0)	0 (0, 0)	0 (0, 0)	0 (0, 0)	0 (0, 0)	0 (0, 0)	0 (0, 0)	0 (0, 0)	0 (0, 0)	0 (0, 0)	0 (0, 0)	0 (0, 0)	0 (0, 0)	0 (0, 0)	0 (0, 0)	0 (0, 0)	0 (0, 0)	0 (0, 0)	0 (0, 0)	0 (0, 0)	0 (0, 0)	0 (0, 0)	0 (0, 0)	0 (0, 0)	0 (0, 0)	0 (0, 0)	0 (0, 0)
Chengde	Hebei	North	Male	5 y～	0 (0, 0)	0 (0, 0)	0 (0, 0)	0 (0, 0)	0 (0, 0)	0 (0, 0)	0 (0, 0)	0 (0, 0)	0 (0, 0)	0 (0, 0)	0 (0, 0)	0 (0, 0)	0 (0, 0)	0 (0, 0)	0 (0, 0)	0 (0, 0)	0 (0, 0)	0 (0, 0)	0 (0, 0)	0 (0, 0)	0 (0, 0)	0 (0, 0)	0 (0, 0)	0 (0, 0)	0 (0, 0)	0 (0, 0)	0 (0, 0)	0 (0, 0)
Chengde	Hebei	North	Male	10 y～	0 (0, 0)	0 (0, 0)	0 (0, 0)	0 (0, 0)	0 (0, 0)	0 (0, 0)	0 (0, 0)	0 (0, 0)	0 (0, 0)	0 (0, 0)	0 (0, 0)	0 (0, 0)	0 (0, 0)	0 (0, 0)	0 (0, 0)	0 (0, 0)	0 (0, 0)	0 (0, 0)	0 (0, 0)	0 (0, 0)	0 (0, 0)	0 (0, 0)	0 (0, 0)	0 (0, 0)	0 (0, 0)	0 (0, 0)	0 (0, 0)	0 (0, 0)
Chengde	Hebei	North	Male	15 y～	0 (0, 0)	0 (0, 0)	0 (0, 0)	0 (0, 0)	0 (0, 0)	0 (0, 0)	0 (0, 0)	0 (0, 0)	0 (0, 0)	0 (0, 0)	0 (0, 0)	0 (0, 0)	0 (0, 0)	0 (0, 0)	0 (0, 0)	0 (0, 0)	0 (0, 0)	0 (0, 0)	0 (0, 0)	0 (0, 0)	0 (0, 0)	0 (0, 0)	0 (0, 0)	0 (0, 0)	0 (0, 0)	0 (0, 0)	0 (0, 0)	0 (0, 0)
Chengde	Hebei	North	Male	20 y～	0 (0, 0)	0 (0, 0)	0 (0, 0)	0 (0, 0)	0 (0, 0)	0 (0, 0)	0 (0, 0)	0 (0, 0)	0 (0, 0)	0 (0, 0)	0 (0, 0)	0 (0, 0)	0 (0, 0)	0 (0, 0)	0 (0, 0)	0 (0, 0)	0 (0, 0)	0 (0, 0)	0 (0, 0)	0 (0, 0)	0 (0, 0)	0 (0, 0)	0 (0, 0)	0 (0, 0)	0 (0, 0)	0 (0, 0)	0 (0, 0)	0 (0, 1)
Chengde	Hebei	North	Male	25 y～	0 (0, 0)	0 (0, 0)	0 (0, 0)	0 (0, 0)	0 (0, 0)	0 (0, 0)	0 (0, 0)	0 (0, 0)	0 (0, 0)	0 (0, 0)	0 (0, 0)	0 (0, 0)	0 (0, 0)	0 (0, 0)	0 (0, 0)	0 (0, 0)	0 (0, 0)	0 (0, 0)	0 (0, 0)	0 (0, 0)	0 (0, 0)	0 (0, 0)	0 (0, 0)	0 (0, 0)	0 (0, 0)	0 (0, 0)	0 (0, 0)	1 (1, 1)
Chengde	Hebei	North	Male	30 y～	0 (0, 0)	0 (0, 0)	0 (0, 0)	1 (0, 1)	0 (0, 0)	0 (0, 0)	0 (0, 0)	0 (0, 0)	0 (0, 0)	0 (0, 0)	0 (0, 0)	0 (0, 0)	0 (0, 0)	0 (0, 0)	0 (0, 0)	0 (0, 0)	0 (0, 0)	0 (0, 0)	0 (0, 0)	0 (0, 0)	0 (0, 0)	0 (0, 0)	0 (0, 0)	1 (0, 1)	0 (0, 1)	1 (0, 1)	0 (0, 0)	1 (1, 1)
Chengde	Hebei	North	Male	35 y～	1 (1, 1)	1 (1, 1)	0 (0, 0)	2 (1, 2)	0 (0, 0)	0 (0, 0)	0 (0, 0)	0 (0, 0)	0 (0, 0)	0 (0, 0)	0 (0, 0)	0 (0, 0)	0 (0, 0)	0 (0, 0)	0 (0, 0)	0 (0, 0)	0 (0, 0)	0 (0, 0)	0 (0, 0)	0 (0, 0)	0 (0, 1)	1 (1, 1)	0 (0, 0)	1 (1, 1)	1 (1, 1)	2 (1, 2)	1 (0, 1)	3 (3, 4)
Chengde	Hebei	North	Male	40 y～	1 (1, 1)	2 (1, 2)	1 (0, 1)	3 (3, 4)	0 (0, 0)	0 (0, 0)	0 (0, 0)	0 (0, 0)	0 (0, 0)	0 (0, 0)	0 (0, 0)	0 (0, 0)	0 (0, 0)	0 (0, 0)	0 (0, 0)	0 (0, 0)	0 (0, 0)	0 (0, 0)	0 (0, 0)	0 (0, 0)	1 (1, 1)	1 (1, 1)	0 (0, 1)	3 (2, 3)	2 (2, 3)	3 (3, 3)	1 (1, 1)	6 (5, 7)
Chengde	Hebei	North	Male	45 y～	2 (2, 2)	2 (2, 2)	1 (1, 1)	5 (4, 5)	0 (0, 0)	0 (0, 0)	0 (0, 0)	0 (0, 0)	0 (0, 0)	0 (0, 0)	0 (0, 0)	1 (1, 1)	0 (0, 0)	0 (0, 0)	0 (0, 0)	0 (0, 0)	0 (0, 0)	0 (0, 0)	0 (0, 0)	0 (0, 0)	2 (1, 2)	2 (2, 2)	1 (1, 1)	5 (4, 5)	4 (3, 5)	5 (4, 5)	2 (2, 2)	11 (9, 12)
Chengde	Hebei	North	Male	50 y～	2 (2, 2)	2 (2, 3)	1 (1, 1)	5 (5, 6)	0 (0, 0)	0 (0, 0)	0 (0, 0)	0 (0, 0)	1 (0, 1)	1 (0, 1)	0 (0, 0)	1 (1, 2)	0 (0, 0)	0 (0, 0)	0 (0, 0)	0 (0, 0)	0 (0, 0)	0 (0, 0)	0 (0, 0)	0 (0, 0)	2 (2, 2)	2 (2, 3)	1 (1, 1)	5 (4, 6)	5 (4, 5)	5 (5, 6)	2 (2, 3)	12 (10, 14)
Chengde	Hebei	North	Male	55 y～	4 (3, 5)	5 (4, 6)	2 (2, 2)	11 (9, 13)	0 (0, 0)	0 (0, 0)	0 (0, 0)	0 (0, 0)	2 (1, 2)	2 (1, 2)	1 (1, 1)	4 (3, 5)	0 (0, 0)	0 (0, 0)	0 (0, 0)	1 (0, 1)	0 (0, 0)	0 (0, 0)	0 (0, 0)	0 (0, 1)	4 (3, 4)	4 (4, 5)	2 (2, 2)	10 (8, 11)	10 (8, 11)	12 (10, 13)	5 (4, 6)	27 (22, 31)
Chengde	Hebei	North	Male	60 y～	4 (3, 4)	5 (4, 6)	2 (2, 2)	11 (9, 12)	0 (0, 0)	0 (0, 0)	0 (0, 0)	1 (1, 1)	2 (2, 3)	3 (2, 3)	1 (1, 1)	6 (4, 7)	0 (0, 0)	0 (0, 0)	0 (0, 0)	1 (1, 1)	0 (0, 0)	0 (0, 0)	0 (0, 0)	0 (0, 1)	4 (3, 4)	5 (4, 6)	2 (2, 2)	11 (9, 12)	11 (9, 13)	13 (11, 15)	5 (4, 6)	29 (24, 34)
Chengde	Hebei	North	Male	65 y～	4 (3, 4)	5 (4, 5)	2 (2, 2)	11 (9, 12)	0 (0, 1)	0 (0, 1)	0 (0, 0)	1 (1, 1)	3 (2, 3)	3 (2, 3)	1 (1, 1)	6 (5, 8)	0 (0, 0)	0 (0, 0)	0 (0, 0)	1 (1, 1)	0 (0, 0)	0 (0, 0)	0 (0, 0)	0 (0, 1)	4 (3, 4)	5 (4, 5)	2 (2, 2)	10 (9, 12)	11 (9, 13)	13 (11, 16)	5 (4, 6)	29 (24, 34)
Chengde	Hebei	North	Male	70 y～	4 (3, 5)	5 (4, 6)	2 (2, 2)	11 (9, 13)	1 (1, 1)	1 (1, 1)	0 (0, 0)	2 (2, 3)	3 (2, 4)	3 (2, 4)	1 (1, 1)	7 (6, 9)	0 (0, 1)	1 (0, 1)	0 (0, 0)	1 (1, 2)	0 (0, 0)	0 (0, 0)	0 (0, 0)	1 (0, 1)	5 (4, 6)	6 (5, 7)	3 (2, 3)	14 (12, 16)	14 (11, 16)	17 (13, 19)	6 (5, 7)	37 (30, 43)
Chengde	Hebei	North	Male	75 y～	4 (4, 5)	5 (4, 6)	2 (2, 3)	12 (10, 14)	1 (1, 1)	1 (1, 2)	0 (0, 1)	3 (2, 4)	2 (2, 3)	3 (2, 3)	1 (1, 1)	6 (5, 8)	1 (1, 1)	1 (1, 1)	0 (0, 0)	2 (1, 2)	0 (0, 0)	0 (0, 0)	0 (0, 0)	1 (1, 1)	5 (4, 6)	7 (6, 7)	3 (2, 3)	14 (12, 16)	14 (12, 17)	17 (14, 20)	7 (5, 8)	38 (31, 45)
Chengde	Hebei	North	Male	80 y～	4 (3, 4)	5 (4, 6)	2 (1, 2)	10 (8, 12)	1 (1, 1)	1 (1, 2)	1 (0, 1)	3 (3, 4)	1 (1, 2)	2 (1, 2)	1 (0, 1)	4 (3, 5)	1 (1, 1)	1 (1, 1)	0 (0, 0)	2 (2, 3)	0 (0, 0)	0 (0, 0)	0 (0, 0)	1 (0, 1)	4 (3, 5)	5 (4, 6)	2 (2, 2)	11 (9, 13)	11 (9, 13)	14 (12, 17)	5 (4, 6)	31 (25, 36)
Chengde	Hebei	North	Male	85 y～	4 (3, 5)	6 (4, 7)	2 (2, 2)	12 (10, 14)	2 (1, 2)	2 (2, 3)	1 (1, 1)	5 (4, 6)	1 (1, 1)	1 (1, 1)	0 (0, 1)	3 (2, 3)	2 (1, 2)	2 (2, 3)	1 (1, 1)	4 (3, 6)	0 (0, 0)	0 (0, 0)	0 (0, 0)	1 (1, 1)	4 (3, 4)	5 (4, 5)	2 (1, 2)	10 (8, 11)	13 (10, 15)	16 (13, 19)	6 (5, 7)	35 (28, 41)
Chengde	Hebei	North	Female	0 y～	0 (0, 0)	0 (0, 0)	0 (0, 0)	0 (0, 0)	0 (0, 0)	0 (0, 0)	0 (0, 0)	0 (0, 0)	0 (0, 0)	0 (0, 0)	0 (0, 0)	0 (0, 0)	0 (0, 0)	0 (0, 0)	0 (0, 0)	0 (0, 0)	0 (0, 0)	0 (0, 0)	0 (0, 0)	0 (0, 0)	0 (0, 0)	0 (0, 0)	0 (0, 0)	0 (0, 0)	0 (0, 0)	0 (0, 0)	0 (0, 0)	0 (0, 0)
Chengde	Hebei	North	Female	1 y～	0 (0, 0)	0 (0, 0)	0 (0, 0)	0 (0, 0)	0 (0, 0)	0 (0, 0)	0 (0, 0)	0 (0, 0)	0 (0, 0)	0 (0, 0)	0 (0, 0)	0 (0, 0)	0 (0, 0)	0 (0, 0)	0 (0, 0)	0 (0, 0)	0 (0, 0)	0 (0, 0)	0 (0, 0)	0 (0, 0)	0 (0, 0)	0 (0, 0)	0 (0, 0)	0 (0, 0)	0 (0, 0)	0 (0, 0)	0 (0, 0)	0 (0, 0)
Chengde	Hebei	North	Female	5 y～	0 (0, 0)	0 (0, 0)	0 (0, 0)	0 (0, 0)	0 (0, 0)	0 (0, 0)	0 (0, 0)	0 (0, 0)	0 (0, 0)	0 (0, 0)	0 (0, 0)	0 (0, 0)	0 (0, 0)	0 (0, 0)	0 (0, 0)	0 (0, 0)	0 (0, 0)	0 (0, 0)	0 (0, 0)	0 (0, 0)	0 (0, 0)	0 (0, 0)	0 (0, 0)	0 (0, 0)	0 (0, 0)	0 (0, 0)	0 (0, 0)	0 (0, 0)
Chengde	Hebei	North	Female	10 y～	0 (0, 0)	0 (0, 0)	0 (0, 0)	0 (0, 0)	0 (0, 0)	0 (0, 0)	0 (0, 0)	0 (0, 0)	0 (0, 0)	0 (0, 0)	0 (0, 0)	0 (0, 0)	0 (0, 0)	0 (0, 0)	0 (0, 0)	0 (0, 0)	0 (0, 0)	0 (0, 0)	0 (0, 0)	0 (0, 0)	0 (0, 0)	0 (0, 0)	0 (0, 0)	0 (0, 0)	0 (0, 0)	0 (0, 0)	0 (0, 0)	0 (0, 0)
Chengde	Hebei	North	Female	15 y～	0 (0, 0)	0 (0, 0)	0 (0, 0)	0 (0, 0)	0 (0, 0)	0 (0, 0)	0 (0, 0)	0 (0, 0)	0 (0, 0)	0 (0, 0)	0 (0, 0)	0 (0, 0)	0 (0, 0)	0 (0, 0)	0 (0, 0)	0 (0, 0)	0 (0, 0)	0 (0, 0)	0 (0, 0)	0 (0, 0)	0 (0, 0)	0 (0, 0)	0 (0, 0)	0 (0, 0)	0 (0, 0)	0 (0, 0)	0 (0, 0)	0 (0, 0)
Chengde	Hebei	North	Female	20 y～	0 (0, 0)	0 (0, 0)	0 (0, 0)	0 (0, 0)	0 (0, 0)	0 (0, 0)	0 (0, 0)	0 (0, 0)	0 (0, 0)	0 (0, 0)	0 (0, 0)	0 (0, 0)	0 (0, 0)	0 (0, 0)	0 (0, 0)	0 (0, 0)	0 (0, 0)	0 (0, 0)	0 (0, 0)	0 (0, 0)	0 (0, 0)	0 (0, 0)	0 (0, 0)	0 (0, 0)	0 (0, 0)	0 (0, 0)	0 (0, 0)	0 (0, 0)
Chengde	Hebei	North	Female	25 y～	0 (0, 0)	0 (0, 0)	0 (0, 0)	0 (0, 0)	0 (0, 0)	0 (0, 0)	0 (0, 0)	0 (0, 0)	0 (0, 0)	0 (0, 0)	0 (0, 0)	0 (0, 0)	0 (0, 0)	0 (0, 0)	0 (0, 0)	0 (0, 0)	0 (0, 0)	0 (0, 0)	0 (0, 0)	0 (0, 0)	0 (0, 0)	0 (0, 0)	0 (0, 0)	0 (0, 0)	0 (0, 0)	0 (0, 0)	0 (0, 0)	0 (0, 0)
Chengde	Hebei	North	Female	30 y～	0 (0, 0)	0 (0, 0)	0 (0, 0)	0 (0, 0)	0 (0, 0)	0 (0, 0)	0 (0, 0)	0 (0, 0)	0 (0, 0)	0 (0, 0)	0 (0, 0)	0 (0, 0)	0 (0, 0)	0 (0, 0)	0 (0, 0)	0 (0, 0)	0 (0, 0)	0 (0, 0)	0 (0, 0)	0 (0, 0)	0 (0, 0)	0 (0, 0)	0 (0, 0)	0 (0, 0)	0 (0, 0)	0 (0, 0)	0 (0, 0)	0 (0, 0)
Chengde	Hebei	North	Female	35 y～	0 (0, 0)	0 (0, 0)	0 (0, 0)	0 (0, 0)	0 (0, 0)	0 (0, 0)	0 (0, 0)	0 (0, 0)	0 (0, 0)	0 (0, 0)	0 (0, 0)	0 (0, 0)	0 (0, 0)	0 (0, 0)	0 (0, 0)	0 (0, 0)	0 (0, 0)	0 (0, 0)	0 (0, 0)	0 (0, 0)	0 (0, 0)	0 (0, 0)	0 (0, 0)	0 (0, 0)	0 (0, 0)	0 (0, 0)	0 (0, 0)	1 (1, 1)
Chengde	Hebei	North	Female	40 y～	0 (0, 0)	0 (0, 0)	0 (0, 0)	1 (1, 1)	0 (0, 0)	0 (0, 0)	0 (0, 0)	0 (0, 0)	0 (0, 0)	0 (0, 0)	0 (0, 0)	0 (0, 0)	0 (0, 0)	0 (0, 0)	0 (0, 0)	0 (0, 0)	0 (0, 0)	0 (0, 0)	0 (0, 0)	0 (0, 0)	0 (0, 0)	0 (0, 0)	0 (0, 0)	1 (1, 1)	1 (0, 1)	1 (1, 1)	0 (0, 0)	2 (2, 2)
Chengde	Hebei	North	Female	45 y～	0 (0, 0)	1 (1, 1)	0 (0, 0)	1 (1, 1)	0 (0, 0)	0 (0, 0)	0 (0, 0)	0 (0, 0)	0 (0, 0)	0 (0, 0)	0 (0, 0)	1 (0, 1)	0 (0, 0)	0 (0, 0)	0 (0, 0)	0 (0, 0)	0 (0, 0)	0 (0, 0)	0 (0, 0)	0 (0, 0)	0 (0, 0)	1 (1, 1)	0 (0, 0)	1 (1, 1)	1 (1, 1)	2 (1, 2)	0 (0, 0)	3 (3, 4)
Chengde	Hebei	North	Female	50 y～	0 (0, 0)	1 (1, 1)	0 (0, 0)	1 (1, 1)	0 (0, 0)	0 (0, 0)	0 (0, 0)	0 (0, 0)	0 (0, 0)	0 (0, 1)	0 (0, 0)	1 (1, 1)	0 (0, 0)	0 (0, 0)	0 (0, 0)	0 (0, 0)	0 (0, 0)	0 (0, 0)	0 (0, 0)	0 (0, 0)	1 (0, 1)	1 (1, 1)	0 (0, 0)	2 (1, 2)	1 (1, 1)	2 (2, 3)	0 (0, 0)	4 (3, 4)
Chengde	Hebei	North	Female	55 y～	1 (1, 1)	1 (1, 2)	0 (0, 0)	3 (2, 3)	0 (0, 0)	0 (0, 0)	0 (0, 0)	0 (0, 0)	0 (0, 1)	1 (1, 1)	0 (0, 0)	2 (1, 2)	0 (0, 0)	0 (0, 0)	0 (0, 0)	0 (0, 0)	0 (0, 0)	0 (0, 0)	0 (0, 0)	0 (0, 0)	1 (1, 1)	2 (2, 2)	0 (0, 0)	3 (3, 4)	3 (2, 3)	4 (4, 5)	1 (1, 1)	8 (6, 9)
Chengde	Hebei	North	Female	60 y～	1 (1, 1)	2 (2, 2)	0 (0, 0)	4 (3, 4)	0 (0, 0)	0 (0, 0)	0 (0, 0)	0 (0, 0)	1 (0, 1)	1 (1, 1)	0 (0, 0)	2 (1, 2)	0 (0, 0)	0 (0, 0)	0 (0, 0)	0 (0, 0)	0 (0, 0)	0 (0, 0)	0 (0, 0)	0 (0, 0)	1 (1, 2)	2 (2, 3)	0 (0, 1)	4 (4, 5)	3 (3, 4)	6 (5, 7)	1 (1, 1)	11 (9, 12)
Chengde	Hebei	North	Female	65 y～	2 (1, 2)	2 (2, 3)	0 (0, 1)	4 (4, 5)	0 (0, 0)	0 (0, 0)	0 (0, 0)	0 (0, 0)	1 (0, 1)	1 (1, 1)	0 (0, 0)	2 (1, 2)	0 (0, 0)	0 (0, 0)	0 (0, 0)	0 (0, 0)	0 (0, 0)	0 (0, 0)	0 (0, 0)	0 (0, 0)	2 (1, 2)	3 (2, 3)	1 (0, 1)	5 (4, 6)	4 (3, 5)	7 (6, 8)	1 (1, 2)	12 (10, 14)
Chengde	Hebei	North	Female	70 y～	3 (2, 3)	4 (3, 5)	1 (1, 1)	7 (6, 9)	0 (0, 0)	1 (0, 1)	0 (0, 0)	1 (1, 1)	1 (1, 1)	1 (1, 2)	0 (0, 0)	2 (2, 3)	0 (0, 0)	0 (0, 1)	0 (0, 0)	1 (1, 1)	0 (0, 0)	0 (0, 0)	0 (0, 0)	1 (0, 1)	3 (2, 3)	4 (4, 5)	1 (1, 1)	8 (7, 9)	6 (5, 7)	11 (9, 13)	2 (2, 2)	20 (16, 23)
Chengde	Hebei	North	Female	75 y～	4 (3, 4)	6 (5, 7)	1 (1, 1)	11 (9, 13)	0 (0, 0)	1 (1, 1)	0 (0, 0)	1 (1, 2)	1 (1, 1)	2 (1, 2)	0 (0, 0)	3 (2, 4)	0 (0, 0)	1 (1, 1)	0 (0, 0)	1 (1, 1)	0 (0, 0)	0 (0, 1)	0 (0, 0)	1 (1, 1)	4 (3, 4)	6 (5, 7)	1 (1, 1)	11 (9, 13)	9 (8, 11)	16 (13, 19)	3 (2, 4)	28 (23, 33)
Chengde	Hebei	North	Female	80 y～	4 (3, 5)	6 (5, 7)	1 (1, 2)	12 (9, 14)	1 (1, 1)	1 (1, 1)	0 (0, 0)	2 (2, 2)	1 (1, 1)	1 (1, 2)	0 (0, 0)	2 (2, 3)	1 (0, 1)	1 (1, 1)	0 (0, 0)	2 (1, 2)	0 (0, 0)	0 (0, 0)	0 (0, 0)	1 (1, 1)	4 (3, 4)	6 (5, 7)	1 (1, 1)	11 (9, 12)	10 (8, 12)	16 (13, 18)	4 (3, 4)	29 (24, 34)
Chengde	Hebei	North	Female	85 y～	7 (6, 8)	11 (9, 13)	2 (2, 3)	21 (17, 25)	2 (1, 2)	3 (2, 3)	1 (1, 1)	5 (4, 6)	1 (1, 1)	1 (1, 2)	0 (0, 0)	2 (2, 3)	2 (1, 2)	3 (2, 3)	1 (0, 1)	5 (3, 6)	0 (0, 0)	1 (0, 1)	0 (0, 0)	1 (1, 1)	5 (4, 6)	8 (7, 10)	2 (2, 2)	16 (13, 18)	17 (13, 20)	27 (21, 32)	6 (5, 7)	50 (40, 59)
Handan	Hebei	North	Male	0 y～	0 (0, 0)	0 (0, 0)	0 (0, 0)	0 (0, 0)	0 (0, 0)	0 (0, 0)	0 (0, 0)	0 (0, 0)	0 (0, 0)	0 (0, 0)	0 (0, 0)	0 (0, 0)	1 (0, 1)	0 (0, 0)	0 (0, 0)	1 (1, 1)	0 (0, 0)	0 (0, 0)	0 (0, 0)	0 (0, 0)	0 (0, 0)	0 (0, 0)	0 (0, 0)	0 (0, 0)	1 (0, 1)	0 (0, 0)	0 (0, 0)	1 (1, 1)
Handan	Hebei	North	Male	1 y～	0 (0, 0)	0 (0, 0)	0 (0, 0)	0 (0, 0)	0 (0, 0)	0 (0, 0)	0 (0, 0)	0 (0, 0)	0 (0, 0)	0 (0, 0)	0 (0, 0)	0 (0, 0)	0 (0, 1)	0 (0, 0)	0 (0, 0)	1 (1, 1)	0 (0, 0)	0 (0, 0)	0 (0, 0)	0 (0, 0)	0 (0, 0)	0 (0, 0)	0 (0, 0)	0 (0, 0)	0 (0, 1)	0 (0, 0)	0 (0, 0)	1 (1, 1)
Handan	Hebei	North	Male	5 y～	0 (0, 0)	0 (0, 0)	0 (0, 0)	0 (0, 0)	0 (0, 0)	0 (0, 0)	0 (0, 0)	0 (0, 0)	0 (0, 0)	0 (0, 0)	0 (0, 0)	0 (0, 0)	0 (0, 0)	0 (0, 0)	0 (0, 0)	0 (0, 1)	0 (0, 0)	0 (0, 0)	0 (0, 0)	0 (0, 0)	0 (0, 0)	0 (0, 0)	0 (0, 0)	0 (0, 0)	0 (0, 1)	0 (0, 0)	0 (0, 0)	1 (1, 1)
Handan	Hebei	North	Male	10 y～	0 (0, 0)	0 (0, 0)	0 (0, 0)	0 (0, 0)	0 (0, 0)	0 (0, 0)	0 (0, 0)	0 (0, 0)	0 (0, 0)	0 (0, 0)	0 (0, 0)	0 (0, 0)	0 (0, 0)	0 (0, 0)	0 (0, 0)	0 (0, 0)	0 (0, 0)	0 (0, 0)	0 (0, 0)	0 (0, 0)	0 (0, 0)	0 (0, 0)	0 (0, 0)	1 (1, 1)	1 (0, 1)	0 (0, 0)	0 (0, 0)	1 (1, 1)
Handan	Hebei	North	Male	15 y～	0 (0, 0)	0 (0, 0)	0 (0, 0)	1 (1, 1)	0 (0, 0)	0 (0, 0)	0 (0, 0)	0 (0, 0)	0 (0, 0)	0 (0, 0)	0 (0, 0)	0 (0, 0)	0 (0, 0)	0 (0, 0)	0 (0, 0)	0 (0, 0)	0 (0, 0)	0 (0, 0)	0 (0, 0)	0 (0, 0)	1 (1, 1)	0 (0, 1)	0 (0, 0)	2 (1, 2)	1 (1, 2)	1 (1, 1)	0 (0, 0)	3 (2, 3)
Handan	Hebei	North	Male	20 y～	1 (1, 1)	0 (0, 1)	0 (0, 0)	2 (1, 2)	0 (0, 0)	0 (0, 0)	0 (0, 0)	0 (0, 0)	0 (0, 0)	0 (0, 0)	0 (0, 0)	0 (0, 0)	0 (0, 0)	0 (0, 0)	0 (0, 0)	0 (0, 1)	0 (0, 0)	0 (0, 0)	0 (0, 0)	0 (0, 0)	1 (1, 1)	0 (0, 0)	0 (0, 0)	1 (1, 1)	2 (2, 2)	1 (1, 1)	0 (0, 1)	4 (3, 4)
Handan	Hebei	North	Male	25 y～	2 (1, 2)	1 (1, 1)	0 (0, 0)	3 (3, 3)	0 (0, 0)	0 (0, 0)	0 (0, 0)	0 (0, 0)	0 (0, 0)	0 (0, 0)	0 (0, 0)	0 (0, 0)	0 (0, 0)	0 (0, 0)	0 (0, 0)	0 (0, 0)	0 (0, 0)	0 (0, 0)	0 (0, 0)	0 (0, 0)	1 (1, 1)	1 (0, 1)	0 (0, 0)	2 (2, 2)	3 (2, 3)	2 (1, 2)	1 (1, 1)	5 (4, 6)
Handan	Hebei	North	Male	30 y～	2 (2, 3)	1 (1, 1)	1 (1, 1)	4 (4, 5)	0 (0, 0)	0 (0, 0)	0 (0, 0)	0 (0, 0)	0 (0, 0)	0 (0, 0)	0 (0, 0)	0 (0, 0)	0 (0, 0)	0 (0, 0)	0 (0, 0)	0 (0, 0)	0 (0, 0)	0 (0, 0)	0 (0, 0)	0 (0, 0)	2 (2, 2)	1 (1, 1)	1 (0, 1)	4 (4, 4)	5 (4, 5)	3 (2, 3)	1 (1, 1)	9 (8, 10)
Handan	Hebei	North	Male	35 y～	7 (6, 8)	4 (3, 4)	2 (2, 2)	13 (11, 14)	0 (0, 0)	0 (0, 0)	0 (0, 0)	0 (0, 0)	1 (0, 1)	0 (0, 0)	0 (0, 0)	1 (1, 1)	0 (0, 0)	0 (0, 0)	0 (0, 0)	1 (0, 1)	0 (0, 0)	0 (0, 0)	0 (0, 0)	0 (0, 0)	5 (5, 6)	3 (2, 3)	1 (1, 1)	9 (8, 10)	13 (12, 15)	7 (6, 8)	3 (3, 4)	24 (21, 26)
Handan	Hebei	North	Male	40 y～	13 (12, 14)	7 (6, 8)	3 (3, 4)	24 (21, 26)	0 (0, 0)	0 (0, 0)	0 (0, 0)	0 (0, 0)	1 (1, 2)	1 (1, 1)	0 (0, 0)	3 (2, 3)	1 (1, 1)	0 (0, 0)	0 (0, 0)	1 (1, 1)	0 (0, 0)	0 (0, 0)	0 (0, 0)	1 (0, 1)	11 (10, 12)	6 (5, 7)	3 (2, 3)	20 (17, 22)	27 (23, 30)	14 (13, 16)	7 (6, 7)	48 (42, 53)
Handan	Hebei	North	Male	45 y～	20 (18, 22)	10 (9, 11)	5 (5, 6)	36 (31, 39)	0 (0, 0)	0 (0, 0)	0 (0, 0)	1 (0, 1)	3 (3, 4)	2 (1, 2)	1 (1, 1)	6 (4, 7)	1 (1, 1)	0 (0, 0)	0 (0, 0)	2 (1, 2)	1 (1, 1)	0 (0, 0)	0 (0, 0)	1 (1, 1)	19 (17, 21)	9 (8, 10)	5 (4, 6)	33 (29, 37)	45 (39, 50)	22 (19, 24)	12 (10, 13)	78 (68, 87)
Handan	Hebei	North	Male	50 y～	23 (20, 25)	11 (10, 12)	6 (5, 7)	40 (35, 44)	1 (1, 1)	0 (0, 0)	0 (0, 0)	1 (1, 1)	6 (5, 8)	3 (2, 3)	1 (1, 2)	11 (8, 13)	1 (1, 2)	1 (0, 1)	0 (0, 0)	2 (2, 3)	1 (1, 1)	0 (0, 0)	0 (0, 0)	1 (1, 2)	21 (18, 23)	10 (9, 12)	6 (5, 6)	37 (32, 41)	53 (45, 59)	26 (22, 29)	14 (12, 15)	92 (79, 103)
Handan	Hebei	North	Male	55 y～	47 (41, 51)	23 (20, 25)	13 (11, 14)	83 (72, 90)	1 (1, 2)	1 (1, 1)	0 (0, 0)	2 (2, 3)	19 (14, 23)	8 (6, 10)	4 (3, 5)	32 (24, 39)	3 (2, 3)	1 (1, 1)	1 (0, 1)	4 (3, 5)	2 (2, 2)	1 (1, 1)	0 (0, 0)	3 (3, 4)	41 (36, 46)	20 (18, 23)	11 (10, 12)	73 (63, 81)	113 (96, 127)	55 (46, 61)	29 (25, 33)	197 (167, 222)
Handan	Hebei	North	Male	60 y～	46 (40, 51)	24 (21, 26)	12 (10, 13)	82 (71, 90)	4 (3, 4)	1 (1, 2)	1 (1, 1)	6 (5, 7)	27 (20, 33)	11 (8, 13)	7 (5, 8)	44 (33, 53)	4 (3, 5)	2 (1, 2)	1 (1, 1)	6 (5, 8)	2 (2, 2)	1 (1, 1)	0 (0, 1)	3 (3, 4)	45 (39, 51)	24 (20, 26)	12 (10, 13)	81 (70, 91)	128 (107, 145)	62 (52, 70)	33 (27, 37)	222 (186, 252)
Handan	Hebei	North	Male	65 y～	46 (39, 50)	24 (20, 26)	12 (10, 13)	81 (69, 88)	5 (4, 6)	2 (2, 2)	1 (1, 1)	9 (7, 10)	29 (22, 35)	11 (9, 14)	7 (5, 9)	47 (35, 57)	4 (3, 5)	2 (1, 2)	1 (1, 1)	7 (6, 9)	2 (2, 2)	1 (1, 1)	1 (0, 1)	3 (3, 4)	44 (38, 50)	23 (20, 26)	11 (10, 13)	79 (68, 89)	130 (108, 148)	63 (52, 71)	33 (28, 38)	226 (188, 257)
Handan	Hebei	North	Male	70 y～	49 (41, 55)	25 (21, 29)	13 (10, 14)	87 (72, 98)	10 (9, 12)	4 (4, 5)	3 (2, 3)	17 (15, 20)	34 (25, 41)	13 (10, 16)	8 (6, 10)	56 (42, 68)	6 (5, 8)	2 (2, 3)	1 (1, 2)	10 (8, 12)	3 (2, 3)	1 (1, 1)	1 (1, 1)	4 (3, 5)	62 (53, 69)	32 (28, 36)	16 (14, 18)	110 (95, 122)	164 (135, 188)	78 (65, 90)	42 (34, 48)	284 (235, 325)
Handan	Hebei	North	Male	75 y～	52 (43, 58)	27 (22, 30)	13 (11, 15)	92 (76, 104)	15 (12, 17)	6 (5, 7)	4 (3, 4)	24 (21, 28)	28 (21, 35)	11 (8, 14)	7 (5, 8)	47 (35, 57)	9 (7, 11)	4 (3, 4)	2 (2, 3)	15 (12, 19)	3 (2, 3)	1 (1, 1)	1 (1, 1)	5 (4, 5)	63 (55, 71)	33 (28, 37)	16 (14, 18)	113 (97, 126)	170 (141, 196)	82 (68, 93)	43 (36, 50)	295 (244, 339)
Handan	Hebei	North	Male	80 y～	43 (35, 49)	23 (19, 26)	11 (9, 12)	77 (63, 87)	14 (12, 16)	8 (7, 9)	4 (3, 4)	25 (21, 29)	15 (12, 19)	8 (6, 10)	4 (3, 5)	27 (21, 33)	10 (8, 12)	5 (4, 7)	2 (2, 3)	17 (14, 21)	2 (2, 2)	1 (1, 1)	0 (0, 1)	3 (3, 4)	48 (41, 53)	26 (22, 29)	12 (10, 13)	85 (73, 95)	132 (109, 151)	71 (59, 82)	33 (27, 38)	235 (194, 271)
Handan	Hebei	North	Male	85 y～	51 (41, 58)	27 (22, 31)	13 (10, 15)	91 (74, 104)	21 (18, 24)	11 (10, 13)	5 (4, 6)	38 (32, 43)	11 (8, 13)	6 (4, 7)	3 (2, 3)	19 (15, 24)	20 (16, 24)	11 (9, 13)	5 (4, 6)	35 (28, 44)	2 (2, 3)	1 (1, 1)	1 (0, 1)	4 (3, 5)	43 (37, 49)	23 (20, 26)	11 (9, 12)	77 (66, 87)	148 (122, 171)	80 (66, 93)	37 (30, 43)	265 (218, 307)
Handan	Hebei	North	Female	0 y～	0 (0, 0)	0 (0, 0)	0 (0, 0)	0 (0, 0)	0 (0, 0)	0 (0, 0)	0 (0, 0)	0 (0, 0)	0 (0, 0)	0 (0, 0)	0 (0, 0)	0 (0, 0)	0 (0, 0)	0 (0, 0)	0 (0, 0)	0 (0, 0)	0 (0, 0)	0 (0, 0)	0 (0, 0)	0 (0, 0)	0 (0, 0)	0 (0, 0)	0 (0, 0)	0 (0, 0)	0 (0, 0)	0 (0, 0)	0 (0, 0)	0 (0, 0)
Handan	Hebei	North	Female	1 y～	0 (0, 0)	0 (0, 0)	0 (0, 0)	0 (0, 0)	0 (0, 0)	0 (0, 0)	0 (0, 0)	0 (0, 0)	0 (0, 0)	0 (0, 0)	0 (0, 0)	0 (0, 0)	0 (0, 1)	0 (0, 0)	0 (0, 0)	1 (1, 1)	0 (0, 0)	0 (0, 0)	0 (0, 0)	0 (0, 0)	0 (0, 0)	0 (0, 0)	0 (0, 0)	0 (0, 0)	0 (0, 1)	0 (0, 0)	0 (0, 0)	1 (1, 1)
Handan	Hebei	North	Female	5 y～	0 (0, 0)	0 (0, 0)	0 (0, 0)	0 (0, 0)	0 (0, 0)	0 (0, 0)	0 (0, 0)	0 (0, 0)	0 (0, 0)	0 (0, 0)	0 (0, 0)	0 (0, 0)	0 (0, 0)	0 (0, 0)	0 (0, 0)	0 (0, 0)	0 (0, 0)	0 (0, 0)	0 (0, 0)	0 (0, 0)	0 (0, 0)	0 (0, 0)	0 (0, 0)	0 (0, 0)	0 (0, 0)	0 (0, 0)	0 (0, 0)	0 (0, 1)
Handan	Hebei	North	Female	10 y～	0 (0, 0)	0 (0, 0)	0 (0, 0)	0 (0, 0)	0 (0, 0)	0 (0, 0)	0 (0, 0)	0 (0, 0)	0 (0, 0)	0 (0, 0)	0 (0, 0)	0 (0, 0)	0 (0, 0)	0 (0, 0)	0 (0, 0)	0 (0, 0)	0 (0, 0)	0 (0, 0)	0 (0, 0)	0 (0, 0)	0 (0, 0)	0 (0, 0)	0 (0, 0)	1 (0, 1)	0 (0, 1)	0 (0, 0)	0 (0, 0)	1 (1, 1)
Handan	Hebei	North	Female	15 y～	0 (0, 0)	0 (0, 0)	0 (0, 0)	0 (0, 0)	0 (0, 0)	0 (0, 0)	0 (0, 0)	0 (0, 0)	0 (0, 0)	0 (0, 0)	0 (0, 0)	0 (0, 0)	0 (0, 0)	0 (0, 0)	0 (0, 0)	0 (0, 0)	0 (0, 0)	0 (0, 0)	0 (0, 0)	0 (0, 0)	1 (1, 1)	0 (0, 0)	0 (0, 0)	1 (1, 1)	1 (1, 1)	1 (1, 1)	0 (0, 0)	2 (2, 2)
Handan	Hebei	North	Female	20 y～	0 (0, 0)	0 (0, 0)	0 (0, 0)	0 (0, 0)	0 (0, 0)	0 (0, 0)	0 (0, 0)	0 (0, 0)	0 (0, 0)	0 (0, 0)	0 (0, 0)	0 (0, 0)	0 (0, 0)	0 (0, 0)	0 (0, 0)	0 (0, 0)	0 (0, 0)	0 (0, 0)	0 (0, 0)	0 (0, 0)	0 (0, 1)	0 (0, 0)	0 (0, 0)	1 (1, 1)	1 (1, 1)	1 (1, 1)	0 (0, 0)	2 (1, 2)
Handan	Hebei	North	Female	25 y～	0 (0, 0)	0 (0, 0)	0 (0, 0)	1 (1, 1)	0 (0, 0)	0 (0, 0)	0 (0, 0)	0 (0, 0)	0 (0, 0)	0 (0, 0)	0 (0, 0)	0 (0, 0)	0 (0, 0)	0 (0, 0)	0 (0, 0)	0 (0, 0)	0 (0, 0)	0 (0, 0)	0 (0, 0)	0 (0, 0)	0 (0, 0)	0 (0, 0)	0 (0, 0)	1 (1, 1)	1 (1, 1)	1 (1, 1)	0 (0, 0)	2 (2, 2)
Handan	Hebei	North	Female	30 y～	1 (1, 1)	0 (0, 1)	0 (0, 0)	1 (1, 1)	0 (0, 0)	0 (0, 0)	0 (0, 0)	0 (0, 0)	0 (0, 0)	0 (0, 0)	0 (0, 0)	0 (0, 0)	0 (0, 0)	0 (0, 0)	0 (0, 0)	0 (0, 0)	0 (0, 0)	0 (0, 0)	0 (0, 0)	0 (0, 0)	1 (1, 1)	0 (0, 0)	0 (0, 0)	1 (1, 1)	1 (1, 2)	1 (1, 1)	0 (0, 0)	3 (2, 3)
Handan	Hebei	North	Female	35 y～	1 (1, 1)	1 (1, 1)	0 (0, 0)	2 (2, 2)	0 (0, 0)	0 (0, 0)	0 (0, 0)	0 (0, 0)	1 (0, 1)	0 (0, 1)	0 (0, 0)	1 (1, 1)	0 (0, 0)	0 (0, 0)	0 (0, 0)	0 (0, 0)	0 (0, 0)	0 (0, 0)	0 (0, 0)	0 (0, 0)	1 (1, 1)	1 (1, 1)	0 (0, 0)	2 (2, 3)	3 (2, 3)	2 (2, 2)	0 (0, 1)	6 (5, 6)
Handan	Hebei	North	Female	40 y～	3 (2, 3)	2 (2, 2)	0 (0, 1)	5 (5, 6)	0 (0, 0)	0 (0, 0)	0 (0, 0)	0 (0, 0)	1 (1, 1)	1 (1, 1)	0 (0, 0)	2 (2, 3)	0 (0, 0)	0 (0, 0)	0 (0, 0)	0 (0, 1)	0 (0, 0)	0 (0, 0)	0 (0, 0)	0 (0, 0)	3 (2, 3)	2 (2, 2)	0 (0, 0)	5 (4, 6)	7 (6, 8)	5 (4, 6)	1 (1, 1)	13 (11, 15)
Handan	Hebei	North	Female	45 y～	4 (4, 5)	3 (3, 3)	1 (1, 1)	8 (7, 9)	0 (0, 0)	0 (0, 0)	0 (0, 0)	0 (0, 0)	2 (1, 2)	2 (1, 2)	0 (0, 0)	4 (3, 5)	0 (0, 1)	0 (0, 1)	0 (0, 0)	1 (1, 1)	0 (0, 0)	0 (0, 0)	0 (0, 0)	0 (0, 0)	5 (4, 5)	4 (3, 4)	1 (1, 1)	9 (8, 10)	12 (10, 13)	9 (8, 10)	2 (2, 2)	23 (19, 26)
Handan	Hebei	North	Female	50 y～	5 (4, 5)	4 (3, 4)	1 (1, 1)	10 (8, 10)	0 (0, 0)	0 (0, 0)	0 (0, 0)	0 (0, 1)	2 (2, 3)	2 (2, 3)	0 (0, 1)	5 (4, 6)	0 (0, 0)	0 (0, 0)	0 (0, 0)	1 (0, 1)	0 (0, 0)	0 (0, 0)	0 (0, 0)	0 (0, 1)	6 (5, 7)	5 (4, 5)	1 (1, 1)	12 (10, 13)	14 (12, 16)	11 (10, 13)	2 (2, 3)	28 (24, 32)
Handan	Hebei	North	Female	55 y～	10 (9, 11)	7 (6, 8)	2 (1, 2)	19 (16, 20)	0 (0, 0)	0 (0, 0)	0 (0, 0)	1 (1, 1)	5 (4, 6)	5 (4, 6)	1 (1, 1)	11 (8, 14)	1 (1, 1)	1 (1, 1)	0 (0, 0)	1 (1, 2)	1 (1, 1)	1 (1, 1)	0 (0, 0)	1 (1, 2)	12 (11, 14)	9 (8, 10)	2 (2, 2)	24 (20, 26)	29 (25, 33)	23 (19, 26)	5 (4, 5)	57 (48, 65)
Handan	Hebei	North	Female	60 y～	15 (13, 16)	11 (9, 12)	2 (2, 3)	28 (24, 31)	1 (1, 1)	1 (1, 1)	0 (0, 0)	2 (2, 2)	6 (5, 8)	6 (5, 7)	1 (1, 1)	14 (10, 16)	1 (1, 2)	1 (1, 1)	0 (0, 0)	3 (2, 3)	1 (1, 1)	1 (1, 1)	0 (0, 0)	2 (1, 2)	16 (14, 18)	12 (10, 13)	3 (2, 3)	30 (26, 34)	40 (34, 45)	31 (26, 35)	7 (6, 8)	78 (66, 89)
Handan	Hebei	North	Female	65 y～	17 (15, 19)	13 (11, 14)	3 (2, 3)	33 (28, 36)	1 (1, 2)	1 (1, 2)	0 (0, 0)	3 (3, 4)	7 (5, 8)	6 (5, 8)	1 (1, 2)	15 (11, 18)	1 (1, 2)	1 (1, 2)	0 (0, 0)	3 (2, 3)	1 (1, 1)	1 (1, 1)	0 (0, 0)	2 (2, 3)	19 (16, 21)	14 (12, 15)	3 (3, 4)	36 (31, 40)	47 (39, 53)	36 (30, 41)	8 (7, 9)	91 (77, 104)
Handan	Hebei	North	Female	70 y～	28 (23, 31)	20 (16, 23)	5 (4, 5)	52 (43, 59)	3 (3, 3)	3 (2, 3)	1 (0, 1)	6 (5, 7)	8 (6, 10)	8 (6, 10)	2 (1, 2)	18 (14, 22)	2 (2, 3)	2 (2, 3)	0 (0, 1)	5 (4, 6)	2 (1, 2)	2 (1, 2)	0 (0, 0)	4 (3, 4)	31 (27, 35)	23 (20, 25)	5 (4, 6)	59 (51, 66)	74 (62, 85)	57 (48, 65)	13 (11, 15)	144 (120, 164)
Handan	Hebei	North	Female	75 y～	42 (34, 47)	30 (25, 34)	7 (6, 8)	79 (65, 89)	5 (4, 6)	5 (4, 6)	1 (1, 1)	11 (9, 13)	10 (8, 12)	10 (7, 12)	2 (1, 2)	22 (16, 26)	4 (3, 5)	4 (3, 4)	1 (1, 1)	8 (6, 10)	2 (2, 3)	2 (2, 2)	0 (0, 1)	5 (4, 6)	44 (38, 49)	32 (28, 36)	7 (6, 8)	84 (72, 93)	107 (89, 122)	82 (68, 94)	18 (15, 21)	208 (173, 238)
Handan	Hebei	North	Female	80 y～	47 (39, 54)	34 (27, 38)	8 (7, 9)	89 (73, 101)	9 (7, 10)	6 (5, 7)	2 (1, 2)	17 (14, 19)	10 (7, 12)	7 (5, 9)	2 (1, 2)	18 (14, 22)	7 (5, 8)	5 (4, 6)	1 (1, 2)	13 (10, 16)	3 (2, 3)	2 (2, 2)	0 (0, 1)	5 (4, 6)	45 (39, 51)	32 (27, 36)	8 (7, 9)	85 (73, 95)	120 (99, 138)	86 (71, 99)	21 (17, 24)	227 (188, 261)
Handan	Hebei	North	Female	85 y～	87 (70, 99)	61 (50, 70)	15 (12, 17)	163 (132, 186)	20 (17, 23)	15 (12, 17)	4 (3, 4)	38 (32, 44)	9 (7, 11)	7 (5, 8)	2 (1, 2)	18 (14, 22)	20 (15, 25)	15 (11, 18)	4 (3, 5)	38 (30, 47)	4 (3, 4)	3 (2, 3)	1 (1, 1)	8 (6, 9)	66 (57, 75)	47 (40, 53)	11 (10, 13)	125 (107, 141)	206 (169, 237)	147 (121, 170)	36 (30, 42)	390 (320, 449)
Hengshui	Hebei	North	Male	0 y～	0 (0, 0)	0 (0, 0)	0 (0, 0)	0 (0, 0)	0 (0, 0)	0 (0, 0)	0 (0, 0)	0 (0, 0)	0 (0, 0)	0 (0, 0)	0 (0, 0)	0 (0, 0)	0 (0, 0)	0 (0, 0)	0 (0, 0)	0 (0, 0)	0 (0, 0)	0 (0, 0)	0 (0, 0)	0 (0, 0)	0 (0, 0)	0 (0, 0)	0 (0, 0)	0 (0, 0)	0 (0, 0)	0 (0, 0)	0 (0, 0)	0 (0, 0)
Hengshui	Hebei	North	Male	1 y～	0 (0, 0)	0 (0, 0)	0 (0, 0)	0 (0, 0)	0 (0, 0)	0 (0, 0)	0 (0, 0)	0 (0, 0)	0 (0, 0)	0 (0, 0)	0 (0, 0)	0 (0, 0)	0 (0, 0)	0 (0, 0)	0 (0, 0)	0 (0, 0)	0 (0, 0)	0 (0, 0)	0 (0, 0)	0 (0, 0)	0 (0, 0)	0 (0, 0)	0 (0, 0)	0 (0, 0)	0 (0, 0)	0 (0, 0)	0 (0, 0)	0 (0, 0)
Hengshui	Hebei	North	Male	5 y～	0 (0, 0)	0 (0, 0)	0 (0, 0)	0 (0, 0)	0 (0, 0)	0 (0, 0)	0 (0, 0)	0 (0, 0)	0 (0, 0)	0 (0, 0)	0 (0, 0)	0 (0, 0)	0 (0, 0)	0 (0, 0)	0 (0, 0)	0 (0, 0)	0 (0, 0)	0 (0, 0)	0 (0, 0)	0 (0, 0)	0 (0, 0)	0 (0, 0)	0 (0, 0)	0 (0, 0)	0 (0, 0)	0 (0, 0)	0 (0, 0)	0 (0, 0)
Hengshui	Hebei	North	Male	10 y～	0 (0, 0)	0 (0, 0)	0 (0, 0)	0 (0, 0)	0 (0, 0)	0 (0, 0)	0 (0, 0)	0 (0, 0)	0 (0, 0)	0 (0, 0)	0 (0, 0)	0 (0, 0)	0 (0, 0)	0 (0, 0)	0 (0, 0)	0 (0, 0)	0 (0, 0)	0 (0, 0)	0 (0, 0)	0 (0, 0)	0 (0, 0)	0 (0, 0)	0 (0, 0)	0 (0, 0)	0 (0, 0)	0 (0, 0)	0 (0, 0)	0 (0, 0)
Hengshui	Hebei	North	Male	15 y～	0 (0, 0)	0 (0, 0)	0 (0, 0)	0 (0, 0)	0 (0, 0)	0 (0, 0)	0 (0, 0)	0 (0, 0)	0 (0, 0)	0 (0, 0)	0 (0, 0)	0 (0, 0)	0 (0, 0)	0 (0, 0)	0 (0, 0)	0 (0, 0)	0 (0, 0)	0 (0, 0)	0 (0, 0)	0 (0, 0)	0 (0, 0)	0 (0, 0)	0 (0, 0)	0 (0, 0)	0 (0, 0)	0 (0, 0)	0 (0, 0)	1 (1, 1)
Hengshui	Hebei	North	Male	20 y～	0 (0, 0)	0 (0, 0)	0 (0, 0)	0 (0, 0)	0 (0, 0)	0 (0, 0)	0 (0, 0)	0 (0, 0)	0 (0, 0)	0 (0, 0)	0 (0, 0)	0 (0, 0)	0 (0, 0)	0 (0, 0)	0 (0, 0)	0 (0, 0)	0 (0, 0)	0 (0, 0)	0 (0, 0)	0 (0, 0)	0 (0, 0)	0 (0, 0)	0 (0, 0)	0 (0, 0)	0 (0, 1)	0 (0, 0)	0 (0, 0)	1 (1, 1)
Hengshui	Hebei	North	Male	25 y～	0 (0, 0)	0 (0, 0)	0 (0, 0)	1 (1, 1)	0 (0, 0)	0 (0, 0)	0 (0, 0)	0 (0, 0)	0 (0, 0)	0 (0, 0)	0 (0, 0)	0 (0, 0)	0 (0, 0)	0 (0, 0)	0 (0, 0)	0 (0, 0)	0 (0, 0)	0 (0, 0)	0 (0, 0)	0 (0, 0)	0 (0, 0)	0 (0, 0)	0 (0, 0)	0 (0, 0)	1 (1, 1)	0 (0, 1)	0 (0, 0)	1 (1, 1)
Hengshui	Hebei	North	Male	30 y～	1 (0, 1)	0 (0, 0)	0 (0, 0)	1 (1, 1)	0 (0, 0)	0 (0, 0)	0 (0, 0)	0 (0, 0)	0 (0, 0)	0 (0, 0)	0 (0, 0)	0 (0, 0)	0 (0, 0)	0 (0, 0)	0 (0, 0)	0 (0, 0)	0 (0, 0)	0 (0, 0)	0 (0, 0)	0 (0, 0)	1 (1, 1)	0 (0, 0)	0 (0, 0)	1 (1, 1)	1 (1, 1)	1 (1, 1)	0 (0, 0)	2 (2, 3)
Hengshui	Hebei	North	Male	35 y～	2 (1, 2)	1 (1, 1)	0 (0, 0)	3 (3, 4)	0 (0, 0)	0 (0, 0)	0 (0, 0)	0 (0, 0)	0 (0, 0)	0 (0, 0)	0 (0, 0)	0 (0, 0)	0 (0, 0)	0 (0, 0)	0 (0, 0)	0 (0, 0)	0 (0, 0)	0 (0, 0)	0 (0, 0)	0 (0, 0)	1 (1, 1)	1 (1, 1)	0 (0, 0)	2 (2, 3)	3 (3, 4)	2 (2, 2)	1 (1, 1)	6 (5, 7)
Hengshui	Hebei	North	Male	40 y～	3 (3, 3)	2 (2, 2)	1 (1, 1)	6 (5, 7)	0 (0, 0)	0 (0, 0)	0 (0, 0)	0 (0, 0)	0 (0, 0)	0 (0, 0)	0 (0, 0)	1 (0, 1)	0 (0, 0)	0 (0, 0)	0 (0, 0)	0 (0, 0)	0 (0, 0)	0 (0, 0)	0 (0, 0)	0 (0, 0)	3 (2, 3)	2 (2, 2)	1 (1, 1)	5 (4, 6)	6 (6, 7)	4 (4, 5)	2 (1, 2)	12 (11, 14)
Hengshui	Hebei	North	Male	45 y～	5 (4, 5)	3 (3, 3)	1 (1, 1)	9 (8, 10)	0 (0, 0)	0 (0, 0)	0 (0, 0)	0 (0, 0)	1 (1, 1)	0 (0, 1)	0 (0, 0)	2 (1, 2)	0 (0, 0)	0 (0, 0)	0 (0, 0)	0 (0, 0)	0 (0, 0)	0 (0, 0)	0 (0, 0)	0 (0, 0)	5 (4, 5)	3 (3, 3)	1 (1, 1)	9 (8, 10)	11 (9, 12)	7 (6, 8)	3 (2, 3)	20 (18, 23)
Hengshui	Hebei	North	Male	50 y～	5 (5, 6)	4 (3, 4)	1 (1, 2)	11 (9, 11)	0 (0, 0)	0 (0, 0)	0 (0, 0)	0 (0, 0)	2 (1, 2)	1 (1, 1)	0 (0, 0)	3 (2, 3)	0 (0, 0)	0 (0, 0)	0 (0, 0)	1 (0, 1)	0 (0, 0)	0 (0, 0)	0 (0, 0)	0 (0, 0)	5 (4, 6)	3 (3, 4)	1 (1, 2)	10 (8, 11)	13 (11, 14)	8 (7, 9)	3 (3, 4)	24 (20, 27)
Hengshui	Hebei	North	Male	55 y～	11 (10, 12)	7 (6, 8)	3 (3, 3)	22 (18, 24)	0 (0, 0)	0 (0, 0)	0 (0, 0)	1 (1, 1)	5 (3, 6)	3 (2, 3)	1 (1, 1)	8 (6, 10)	1 (0, 1)	0 (0, 0)	0 (0, 0)	1 (1, 1)	0 (0, 1)	0 (0, 0)	0 (0, 0)	1 (1, 1)	10 (9, 11)	6 (6, 7)	3 (2, 3)	19 (16, 21)	27 (23, 31)	17 (15, 19)	7 (6, 8)	51 (43, 58)
Hengshui	Hebei	North	Male	60 y～	11 (9, 12)	7 (6, 8)	3 (2, 3)	21 (18, 23)	1 (1, 1)	0 (0, 1)	0 (0, 0)	2 (1, 2)	6 (5, 8)	3 (2, 4)	2 (1, 2)	11 (9, 14)	1 (1, 1)	0 (0, 1)	0 (0, 0)	2 (1, 2)	0 (0, 1)	0 (0, 0)	0 (0, 0)	1 (1, 1)	11 (9, 12)	7 (6, 8)	3 (2, 3)	21 (18, 24)	30 (25, 35)	19 (16, 22)	8 (7, 9)	57 (48, 65)
Hengshui	Hebei	North	Male	65 y～	11 (9, 12)	7 (6, 8)	3 (2, 3)	21 (18, 23)	1 (1, 1)	1 (1, 1)	0 (0, 0)	2 (2, 3)	7 (5, 8)	4 (3, 4)	2 (1, 2)	12 (9, 15)	1 (1, 1)	1 (0, 1)	0 (0, 0)	2 (1, 2)	1 (0, 1)	0 (0, 0)	0 (0, 0)	1 (1, 1)	11 (9, 12)	7 (6, 8)	3 (2, 3)	20 (18, 23)	31 (26, 35)	19 (16, 22)	8 (7, 9)	58 (48, 67)
Hengshui	Hebei	North	Male	70 y～	12 (10, 13)	8 (6, 9)	3 (2, 3)	22 (18, 25)	2 (2, 3)	1 (1, 1)	1 (1, 1)	4 (4, 5)	8 (6, 10)	4 (3, 5)	2 (2, 2)	14 (11, 17)	1 (1, 2)	1 (1, 1)	0 (0, 0)	3 (2, 3)	1 (1, 1)	0 (0, 0)	0 (0, 0)	1 (1, 1)	15 (13, 16)	10 (8, 11)	4 (3, 4)	28 (24, 32)	39 (32, 45)	24 (20, 28)	10 (8, 12)	73 (60, 84)
Hengshui	Hebei	North	Male	75 y～	12 (10, 14)	8 (7, 9)	3 (3, 4)	24 (19, 27)	4 (3, 4)	2 (2, 2)	1 (1, 1)	6 (5, 7)	7 (5, 8)	4 (3, 4)	2 (1, 2)	12 (9, 15)	2 (2, 3)	1 (1, 1)	1 (0, 1)	4 (3, 5)	1 (1, 1)	0 (0, 0)	0 (0, 0)	1 (1, 1)	15 (13, 17)	10 (9, 11)	4 (3, 4)	29 (25, 33)	40 (33, 47)	25 (21, 29)	10 (9, 12)	76 (63, 88)
Hengshui	Hebei	North	Male	80 y～	10 (8, 12)	7 (6, 8)	3 (2, 3)	20 (16, 23)	3 (3, 4)	2 (2, 3)	1 (1, 1)	6 (5, 7)	4 (3, 4)	3 (2, 3)	1 (1, 1)	7 (5, 9)	2 (2, 3)	2 (1, 2)	1 (0, 1)	4 (3, 6)	0 (0, 1)	0 (0, 0)	0 (0, 0)	1 (1, 1)	11 (10, 13)	8 (7, 9)	3 (2, 3)	22 (19, 25)	31 (26, 36)	22 (18, 25)	8 (6, 9)	61 (50, 70)
Hengshui	Hebei	North	Male	85 y～	12 (10, 14)	8 (7, 10)	3 (2, 3)	24 (19, 27)	5 (4, 6)	4 (3, 4)	1 (1, 1)	10 (8, 11)	3 (2, 3)	2 (1, 2)	1 (0, 1)	5 (4, 6)	5 (4, 6)	3 (3, 4)	1 (1, 1)	9 (7, 11)	1 (0, 1)	0 (0, 0)	0 (0, 0)	1 (1, 1)	10 (9, 12)	7 (6, 8)	3 (2, 3)	20 (17, 23)	35 (29, 41)	25 (20, 29)	9 (7, 10)	69 (56, 80)
Hengshui	Hebei	North	Female	0 y～	0 (0, 0)	0 (0, 0)	0 (0, 0)	0 (0, 0)	0 (0, 0)	0 (0, 0)	0 (0, 0)	0 (0, 0)	0 (0, 0)	0 (0, 0)	0 (0, 0)	0 (0, 0)	0 (0, 0)	0 (0, 0)	0 (0, 0)	0 (0, 0)	0 (0, 0)	0 (0, 0)	0 (0, 0)	0 (0, 0)	0 (0, 0)	0 (0, 0)	0 (0, 0)	0 (0, 0)	0 (0, 0)	0 (0, 0)	0 (0, 0)	0 (0, 0)
Hengshui	Hebei	North	Female	1 y～	0 (0, 0)	0 (0, 0)	0 (0, 0)	0 (0, 0)	0 (0, 0)	0 (0, 0)	0 (0, 0)	0 (0, 0)	0 (0, 0)	0 (0, 0)	0 (0, 0)	0 (0, 0)	0 (0, 0)	0 (0, 0)	0 (0, 0)	0 (0, 0)	0 (0, 0)	0 (0, 0)	0 (0, 0)	0 (0, 0)	0 (0, 0)	0 (0, 0)	0 (0, 0)	0 (0, 0)	0 (0, 0)	0 (0, 0)	0 (0, 0)	0 (0, 0)
Hengshui	Hebei	North	Female	5 y～	0 (0, 0)	0 (0, 0)	0 (0, 0)	0 (0, 0)	0 (0, 0)	0 (0, 0)	0 (0, 0)	0 (0, 0)	0 (0, 0)	0 (0, 0)	0 (0, 0)	0 (0, 0)	0 (0, 0)	0 (0, 0)	0 (0, 0)	0 (0, 0)	0 (0, 0)	0 (0, 0)	0 (0, 0)	0 (0, 0)	0 (0, 0)	0 (0, 0)	0 (0, 0)	0 (0, 0)	0 (0, 0)	0 (0, 0)	0 (0, 0)	0 (0, 0)
Hengshui	Hebei	North	Female	10 y～	0 (0, 0)	0 (0, 0)	0 (0, 0)	0 (0, 0)	0 (0, 0)	0 (0, 0)	0 (0, 0)	0 (0, 0)	0 (0, 0)	0 (0, 0)	0 (0, 0)	0 (0, 0)	0 (0, 0)	0 (0, 0)	0 (0, 0)	0 (0, 0)	0 (0, 0)	0 (0, 0)	0 (0, 0)	0 (0, 0)	0 (0, 0)	0 (0, 0)	0 (0, 0)	0 (0, 0)	0 (0, 0)	0 (0, 0)	0 (0, 0)	0 (0, 0)
Hengshui	Hebei	North	Female	15 y～	0 (0, 0)	0 (0, 0)	0 (0, 0)	0 (0, 0)	0 (0, 0)	0 (0, 0)	0 (0, 0)	0 (0, 0)	0 (0, 0)	0 (0, 0)	0 (0, 0)	0 (0, 0)	0 (0, 0)	0 (0, 0)	0 (0, 0)	0 (0, 0)	0 (0, 0)	0 (0, 0)	0 (0, 0)	0 (0, 0)	0 (0, 0)	0 (0, 0)	0 (0, 0)	0 (0, 0)	0 (0, 0)	0 (0, 0)	0 (0, 0)	0 (0, 1)
Hengshui	Hebei	North	Female	20 y～	0 (0, 0)	0 (0, 0)	0 (0, 0)	0 (0, 0)	0 (0, 0)	0 (0, 0)	0 (0, 0)	0 (0, 0)	0 (0, 0)	0 (0, 0)	0 (0, 0)	0 (0, 0)	0 (0, 0)	0 (0, 0)	0 (0, 0)	0 (0, 0)	0 (0, 0)	0 (0, 0)	0 (0, 0)	0 (0, 0)	0 (0, 0)	0 (0, 0)	0 (0, 0)	0 (0, 0)	0 (0, 0)	0 (0, 0)	0 (0, 0)	0 (0, 0)
Hengshui	Hebei	North	Female	25 y～	0 (0, 0)	0 (0, 0)	0 (0, 0)	0 (0, 0)	0 (0, 0)	0 (0, 0)	0 (0, 0)	0 (0, 0)	0 (0, 0)	0 (0, 0)	0 (0, 0)	0 (0, 0)	0 (0, 0)	0 (0, 0)	0 (0, 0)	0 (0, 0)	0 (0, 0)	0 (0, 0)	0 (0, 0)	0 (0, 0)	0 (0, 0)	0 (0, 0)	0 (0, 0)	0 (0, 0)	0 (0, 0)	0 (0, 0)	0 (0, 0)	0 (0, 1)
Hengshui	Hebei	North	Female	30 y～	0 (0, 0)	0 (0, 0)	0 (0, 0)	0 (0, 0)	0 (0, 0)	0 (0, 0)	0 (0, 0)	0 (0, 0)	0 (0, 0)	0 (0, 0)	0 (0, 0)	0 (0, 0)	0 (0, 0)	0 (0, 0)	0 (0, 0)	0 (0, 0)	0 (0, 0)	0 (0, 0)	0 (0, 0)	0 (0, 0)	0 (0, 0)	0 (0, 0)	0 (0, 0)	0 (0, 0)	0 (0, 0)	0 (0, 0)	0 (0, 0)	1 (1, 1)
Hengshui	Hebei	North	Female	35 y～	0 (0, 0)	0 (0, 0)	0 (0, 0)	1 (0, 1)	0 (0, 0)	0 (0, 0)	0 (0, 0)	0 (0, 0)	0 (0, 0)	0 (0, 0)	0 (0, 0)	0 (0, 0)	0 (0, 0)	0 (0, 0)	0 (0, 0)	0 (0, 0)	0 (0, 0)	0 (0, 0)	0 (0, 0)	0 (0, 0)	0 (0, 0)	0 (0, 0)	0 (0, 0)	1 (1, 1)	1 (1, 1)	1 (1, 1)	0 (0, 0)	1 (1, 2)
Hengshui	Hebei	North	Female	40 y～	1 (1, 1)	1 (1, 1)	0 (0, 0)	1 (1, 1)	0 (0, 0)	0 (0, 0)	0 (0, 0)	0 (0, 0)	0 (0, 0)	0 (0, 0)	0 (0, 0)	1 (0, 1)	0 (0, 0)	0 (0, 0)	0 (0, 0)	0 (0, 0)	0 (0, 0)	0 (0, 0)	0 (0, 0)	0 (0, 0)	1 (1, 1)	1 (0, 1)	0 (0, 0)	1 (1, 1)	2 (1, 2)	2 (1, 2)	0 (0, 0)	3 (3, 4)
Hengshui	Hebei	North	Female	45 y～	1 (1, 1)	1 (1, 1)	0 (0, 0)	2 (2, 2)	0 (0, 0)	0 (0, 0)	0 (0, 0)	0 (0, 0)	0 (0, 1)	1 (0, 1)	0 (0, 0)	1 (1, 1)	0 (0, 0)	0 (0, 0)	0 (0, 0)	0 (0, 0)	0 (0, 0)	0 (0, 0)	0 (0, 0)	0 (0, 0)	1 (1, 1)	1 (1, 1)	0 (0, 0)	2 (2, 3)	3 (2, 3)	3 (2, 3)	0 (0, 1)	6 (5, 7)
Hengshui	Hebei	North	Female	50 y～	1 (1, 1)	1 (1, 1)	0 (0, 0)	2 (2, 3)	0 (0, 0)	0 (0, 0)	0 (0, 0)	0 (0, 0)	1 (0, 1)	1 (1, 1)	0 (0, 0)	1 (1, 2)	0 (0, 0)	0 (0, 0)	0 (0, 0)	0 (0, 0)	0 (0, 0)	0 (0, 0)	0 (0, 0)	0 (0, 0)	2 (1, 2)	1 (1, 2)	0 (0, 0)	3 (3, 3)	3 (3, 4)	3 (3, 4)	1 (0, 1)	7 (6, 8)
Hengshui	Hebei	North	Female	55 y～	2 (2, 3)	2 (2, 2)	0 (0, 0)	5 (4, 5)	0 (0, 0)	0 (0, 0)	0 (0, 0)	0 (0, 0)	1 (1, 2)	1 (1, 2)	0 (0, 0)	3 (2, 4)	0 (0, 0)	0 (0, 0)	0 (0, 0)	0 (0, 0)	0 (0, 0)	0 (0, 0)	0 (0, 0)	0 (0, 0)	3 (3, 3)	3 (2, 3)	0 (0, 1)	6 (5, 7)	7 (6, 8)	7 (6, 8)	1 (1, 1)	15 (13, 17)
Hengshui	Hebei	North	Female	60 y～	4 (3, 4)	3 (3, 3)	1 (0, 1)	7 (6, 8)	0 (0, 0)	0 (0, 0)	0 (0, 0)	0 (0, 1)	1 (1, 2)	2 (1, 2)	0 (0, 0)	4 (3, 4)	0 (0, 0)	0 (0, 0)	0 (0, 0)	1 (1, 1)	0 (0, 0)	0 (0, 0)	0 (0, 0)	0 (0, 1)	4 (3, 4)	3 (3, 4)	1 (1, 1)	8 (7, 9)	10 (8, 11)	9 (8, 10)	2 (1, 2)	20 (17, 23)
Hengshui	Hebei	North	Female	65 y～	4 (4, 5)	4 (3, 4)	1 (1, 1)	9 (7, 9)	0 (0, 0)	0 (0, 0)	0 (0, 0)	1 (1, 1)	2 (1, 2)	2 (1, 2)	0 (0, 0)	4 (3, 5)	0 (0, 0)	0 (0, 0)	0 (0, 0)	1 (1, 1)	0 (0, 0)	0 (0, 0)	0 (0, 0)	1 (1, 1)	5 (4, 5)	4 (3, 5)	1 (1, 1)	9 (8, 10)	11 (9, 13)	11 (9, 12)	2 (2, 2)	24 (20, 27)
Hengshui	Hebei	North	Female	70 y～	7 (5, 8)	6 (5, 7)	1 (1, 1)	14 (11, 15)	1 (1, 1)	1 (1, 1)	0 (0, 0)	2 (1, 2)	2 (1, 2)	2 (2, 3)	0 (0, 0)	5 (4, 6)	1 (0, 1)	1 (1, 1)	0 (0, 0)	1 (1, 2)	0 (0, 0)	0 (0, 1)	0 (0, 0)	1 (1, 1)	8 (6, 8)	7 (6, 7)	1 (1, 1)	15 (13, 17)	18 (15, 20)	17 (14, 19)	3 (2, 3)	38 (31, 43)
Hengshui	Hebei	North	Female	75 y～	10 (8, 11)	9 (7, 10)	2 (1, 2)	21 (17, 23)	1 (1, 1)	1 (1, 2)	0 (0, 0)	3 (2, 3)	2 (2, 3)	3 (2, 3)	0 (0, 1)	6 (4, 7)	1 (1, 1)	1 (1, 1)	0 (0, 0)	2 (2, 3)	1 (0, 1)	1 (1, 1)	0 (0, 0)	1 (1, 1)	11 (9, 12)	9 (8, 11)	2 (1, 2)	22 (19, 24)	26 (21, 29)	24 (20, 28)	4 (4, 5)	54 (45, 62)
Hengshui	Hebei	North	Female	80 y～	11 (9, 13)	10 (8, 11)	2 (2, 2)	23 (19, 26)	2 (2, 2)	2 (1, 2)	0 (0, 0)	4 (4, 5)	2 (2, 3)	2 (2, 2)	0 (0, 1)	5 (4, 6)	2 (1, 2)	1 (1, 2)	0 (0, 0)	3 (3, 4)	1 (1, 1)	1 (0, 1)	0 (0, 0)	1 (1, 1)	11 (9, 12)	9 (8, 10)	2 (2, 2)	22 (19, 25)	29 (24, 33)	25 (20, 28)	5 (4, 6)	59 (48, 68)
Hengshui	Hebei	North	Female	85 y～	21 (17, 24)	18 (14, 20)	4 (3, 4)	42 (34, 48)	5 (4, 5)	4 (3, 5)	1 (1, 1)	10 (8, 11)	2 (2, 3)	2 (1, 2)	0 (0, 1)	5 (3, 6)	5 (4, 6)	4 (3, 5)	1 (1, 1)	10 (8, 12)	1 (1, 1)	1 (1, 1)	0 (0, 0)	2 (2, 2)	16 (13, 18)	14 (11, 15)	3 (2, 3)	32 (27, 36)	49 (40, 57)	42 (35, 49)	9 (7, 10)	100 (82, 116)
Langfang	Hebei	North	Male	0 y～	0 (0, 0)	0 (0, 0)	0 (0, 0)	0 (0, 0)	0 (0, 0)	0 (0, 0)	0 (0, 0)	0 (0, 0)	0 (0, 0)	0 (0, 0)	0 (0, 0)	0 (0, 0)	0 (0, 0)	0 (0, 0)	0 (0, 0)	0 (0, 0)	0 (0, 0)	0 (0, 0)	0 (0, 0)	0 (0, 0)	0 (0, 0)	0 (0, 0)	0 (0, 0)	0 (0, 0)	0 (0, 0)	0 (0, 0)	0 (0, 0)	0 (0, 0)
Langfang	Hebei	North	Male	1 y～	0 (0, 0)	0 (0, 0)	0 (0, 0)	0 (0, 0)	0 (0, 0)	0 (0, 0)	0 (0, 0)	0 (0, 0)	0 (0, 0)	0 (0, 0)	0 (0, 0)	0 (0, 0)	0 (0, 0)	0 (0, 0)	0 (0, 0)	0 (0, 0)	0 (0, 0)	0 (0, 0)	0 (0, 0)	0 (0, 0)	0 (0, 0)	0 (0, 0)	0 (0, 0)	0 (0, 0)	0 (0, 0)	0 (0, 0)	0 (0, 0)	0 (0, 0)
Langfang	Hebei	North	Male	5 y～	0 (0, 0)	0 (0, 0)	0 (0, 0)	0 (0, 0)	0 (0, 0)	0 (0, 0)	0 (0, 0)	0 (0, 0)	0 (0, 0)	0 (0, 0)	0 (0, 0)	0 (0, 0)	0 (0, 0)	0 (0, 0)	0 (0, 0)	0 (0, 0)	0 (0, 0)	0 (0, 0)	0 (0, 0)	0 (0, 0)	0 (0, 0)	0 (0, 0)	0 (0, 0)	0 (0, 0)	0 (0, 0)	0 (0, 0)	0 (0, 0)	0 (0, 0)
Langfang	Hebei	North	Male	10 y～	0 (0, 0)	0 (0, 0)	0 (0, 0)	0 (0, 0)	0 (0, 0)	0 (0, 0)	0 (0, 0)	0 (0, 0)	0 (0, 0)	0 (0, 0)	0 (0, 0)	0 (0, 0)	0 (0, 0)	0 (0, 0)	0 (0, 0)	0 (0, 0)	0 (0, 0)	0 (0, 0)	0 (0, 0)	0 (0, 0)	0 (0, 0)	0 (0, 0)	0 (0, 0)	0 (0, 0)	0 (0, 0)	0 (0, 0)	0 (0, 0)	0 (0, 0)
Langfang	Hebei	North	Male	15 y～	0 (0, 0)	0 (0, 0)	0 (0, 0)	0 (0, 0)	0 (0, 0)	0 (0, 0)	0 (0, 0)	0 (0, 0)	0 (0, 0)	0 (0, 0)	0 (0, 0)	0 (0, 0)	0 (0, 0)	0 (0, 0)	0 (0, 0)	0 (0, 0)	0 (0, 0)	0 (0, 0)	0 (0, 0)	0 (0, 0)	0 (0, 0)	0 (0, 0)	0 (0, 0)	0 (0, 0)	0 (0, 0)	0 (0, 0)	0 (0, 0)	1 (0, 1)
Langfang	Hebei	North	Male	20 y～	0 (0, 0)	0 (0, 0)	0 (0, 0)	0 (0, 0)	0 (0, 0)	0 (0, 0)	0 (0, 0)	0 (0, 0)	0 (0, 0)	0 (0, 0)	0 (0, 0)	0 (0, 0)	0 (0, 0)	0 (0, 0)	0 (0, 0)	0 (0, 0)	0 (0, 0)	0 (0, 0)	0 (0, 0)	0 (0, 0)	0 (0, 0)	0 (0, 0)	0 (0, 0)	0 (0, 0)	0 (0, 0)	0 (0, 0)	0 (0, 0)	1 (1, 1)
Langfang	Hebei	North	Male	25 y～	0 (0, 0)	0 (0, 0)	0 (0, 0)	1 (1, 1)	0 (0, 0)	0 (0, 0)	0 (0, 0)	0 (0, 0)	0 (0, 0)	0 (0, 0)	0 (0, 0)	0 (0, 0)	0 (0, 0)	0 (0, 0)	0 (0, 0)	0 (0, 0)	0 (0, 0)	0 (0, 0)	0 (0, 0)	0 (0, 0)	0 (0, 0)	0 (0, 0)	0 (0, 0)	0 (0, 0)	1 (0, 1)	0 (0, 0)	0 (0, 0)	1 (1, 1)
Langfang	Hebei	North	Male	30 y～	0 (0, 1)	0 (0, 0)	0 (0, 0)	1 (1, 1)	0 (0, 0)	0 (0, 0)	0 (0, 0)	0 (0, 0)	0 (0, 0)	0 (0, 0)	0 (0, 0)	0 (0, 0)	0 (0, 0)	0 (0, 0)	0 (0, 0)	0 (0, 0)	0 (0, 0)	0 (0, 0)	0 (0, 0)	0 (0, 0)	0 (0, 0)	0 (0, 0)	0 (0, 0)	1 (1, 1)	1 (1, 1)	1 (1, 1)	0 (0, 0)	2 (2, 2)
Langfang	Hebei	North	Male	35 y～	1 (1, 1)	1 (1, 1)	0 (0, 0)	3 (2, 3)	0 (0, 0)	0 (0, 0)	0 (0, 0)	0 (0, 0)	0 (0, 0)	0 (0, 0)	0 (0, 0)	0 (0, 0)	0 (0, 0)	0 (0, 0)	0 (0, 0)	0 (0, 0)	0 (0, 0)	0 (0, 0)	0 (0, 0)	0 (0, 0)	1 (1, 1)	1 (1, 1)	0 (0, 0)	2 (2, 2)	3 (2, 3)	2 (2, 2)	1 (1, 1)	5 (4, 6)
Langfang	Hebei	North	Male	40 y～	3 (2, 3)	2 (2, 2)	1 (1, 1)	5 (4, 6)	0 (0, 0)	0 (0, 0)	0 (0, 0)	0 (0, 0)	0 (0, 0)	0 (0, 0)	0 (0, 0)	1 (0, 1)	0 (0, 0)	0 (0, 0)	0 (0, 0)	0 (0, 0)	0 (0, 0)	0 (0, 0)	0 (0, 0)	0 (0, 0)	2 (2, 2)	1 (1, 2)	1 (1, 1)	4 (4, 5)	5 (4, 6)	4 (3, 4)	2 (1, 2)	10 (9, 12)
Langfang	Hebei	North	Male	45 y～	4 (3, 4)	3 (2, 3)	1 (1, 2)	8 (7, 9)	0 (0, 0)	0 (0, 0)	0 (0, 0)	0 (0, 0)	1 (0, 1)	0 (0, 0)	0 (0, 0)	1 (1, 2)	0 (0, 0)	0 (0, 0)	0 (0, 0)	0 (0, 0)	0 (0, 0)	0 (0, 0)	0 (0, 0)	0 (0, 0)	4 (3, 4)	2 (2, 3)	1 (1, 1)	7 (6, 8)	9 (7, 10)	5 (5, 6)	3 (3, 3)	17 (15, 19)
Langfang	Hebei	North	Male	50 y～	4 (4, 5)	3 (2, 3)	2 (1, 2)	9 (7, 10)	0 (0, 0)	0 (0, 0)	0 (0, 0)	0 (0, 0)	1 (1, 1)	1 (1, 1)	0 (0, 0)	2 (2, 3)	0 (0, 0)	0 (0, 0)	0 (0, 0)	0 (0, 1)	0 (0, 0)	0 (0, 0)	0 (0, 0)	0 (0, 0)	4 (3, 4)	3 (2, 3)	1 (1, 2)	8 (7, 9)	10 (8, 11)	6 (5, 7)	4 (3, 4)	20 (17, 23)
Langfang	Hebei	North	Male	55 y～	9 (8, 10)	6 (5, 6)	3 (3, 4)	18 (15, 20)	0 (0, 0)	0 (0, 0)	0 (0, 0)	1 (0, 1)	4 (3, 4)	2 (2, 3)	1 (1, 2)	7 (5, 8)	0 (0, 1)	0 (0, 0)	0 (0, 0)	1 (1, 1)	0 (0, 0)	0 (0, 0)	0 (0, 0)	1 (1, 1)	8 (7, 9)	5 (4, 6)	3 (2, 3)	16 (14, 18)	21 (18, 24)	14 (11, 15)	8 (6, 9)	43 (36, 48)
Langfang	Hebei	North	Male	60 y～	9 (7, 10)	6 (5, 7)	3 (3, 3)	18 (15, 20)	1 (1, 1)	0 (0, 0)	0 (0, 0)	1 (1, 1)	5 (4, 6)	3 (2, 3)	2 (1, 2)	9 (7, 11)	1 (1, 1)	0 (0, 0)	0 (0, 0)	1 (1, 2)	0 (0, 0)	0 (0, 0)	0 (0, 0)	1 (1, 1)	9 (7, 10)	6 (5, 7)	3 (3, 3)	17 (15, 20)	24 (20, 28)	15 (13, 17)	8 (7, 9)	48 (40, 54)
Langfang	Hebei	North	Male	65 y～	9 (7, 9)	6 (5, 6)	3 (3, 3)	17 (15, 19)	1 (1, 1)	1 (0, 1)	0 (0, 0)	2 (1, 2)	5 (4, 7)	3 (2, 3)	2 (1, 2)	10 (8, 12)	1 (1, 1)	0 (0, 1)	0 (0, 0)	1 (1, 2)	0 (0, 0)	0 (0, 0)	0 (0, 0)	1 (1, 1)	8 (7, 9)	6 (5, 6)	3 (2, 3)	17 (14, 19)	24 (20, 28)	15 (13, 18)	8 (7, 10)	48 (40, 55)
Langfang	Hebei	North	Male	70 y～	9 (7, 10)	6 (5, 7)	3 (3, 4)	19 (15, 21)	2 (2, 2)	1 (1, 1)	1 (1, 1)	4 (3, 4)	6 (5, 8)	3 (3, 4)	2 (2, 3)	12 (9, 15)	1 (1, 1)	1 (0, 1)	0 (0, 0)	2 (2, 3)	1 (0, 1)	0 (0, 0)	0 (0, 0)	1 (1, 1)	11 (10, 13)	8 (7, 9)	4 (3, 4)	23 (20, 26)	31 (25, 35)	19 (16, 22)	10 (9, 12)	60 (49, 70)
Langfang	Hebei	North	Male	75 y～	10 (8, 11)	7 (5, 8)	3 (3, 4)	20 (16, 22)	3 (2, 3)	1 (1, 2)	1 (1, 1)	5 (4, 6)	5 (4, 7)	3 (2, 3)	2 (1, 2)	10 (8, 12)	2 (1, 2)	1 (1, 1)	1 (0, 1)	3 (2, 4)	1 (0, 1)	0 (0, 0)	0 (0, 0)	1 (1, 1)	12 (10, 13)	8 (7, 9)	4 (4, 5)	24 (20, 27)	32 (26, 37)	20 (16, 23)	11 (9, 13)	63 (51, 73)
Langfang	Hebei	North	Male	80 y～	8 (7, 9)	6 (5, 7)	3 (2, 3)	17 (14, 19)	3 (2, 3)	2 (1, 2)	1 (1, 1)	5 (4, 6)	3 (2, 4)	2 (1, 2)	1 (1, 1)	6 (4, 7)	2 (1, 2)	1 (1, 1)	1 (1, 1)	4 (3, 5)	0 (0, 0)	0 (0, 0)	0 (0, 0)	1 (1, 1)	9 (8, 10)	6 (5, 7)	3 (3, 3)	18 (16, 20)	25 (20, 29)	17 (14, 20)	9 (7, 10)	51 (41, 59)
Langfang	Hebei	North	Male	85 y～	10 (8, 11)	7 (5, 8)	3 (3, 4)	20 (16, 23)	4 (3, 5)	3 (2, 3)	1 (1, 2)	8 (7, 9)	2 (2, 3)	1 (1, 2)	1 (1, 1)	4 (3, 5)	4 (3, 5)	2 (2, 3)	1 (1, 2)	7 (6, 9)	0 (0, 1)	0 (0, 0)	0 (0, 0)	1 (1, 1)	8 (7, 9)	6 (5, 6)	3 (2, 3)	16 (14, 19)	28 (23, 32)	19 (16, 22)	10 (8, 12)	57 (46, 66)
Langfang	Hebei	North	Female	0 y～	0 (0, 0)	0 (0, 0)	0 (0, 0)	0 (0, 0)	0 (0, 0)	0 (0, 0)	0 (0, 0)	0 (0, 0)	0 (0, 0)	0 (0, 0)	0 (0, 0)	0 (0, 0)	0 (0, 0)	0 (0, 0)	0 (0, 0)	0 (0, 0)	0 (0, 0)	0 (0, 0)	0 (0, 0)	0 (0, 0)	0 (0, 0)	0 (0, 0)	0 (0, 0)	0 (0, 0)	0 (0, 0)	0 (0, 0)	0 (0, 0)	0 (0, 0)
Langfang	Hebei	North	Female	1 y～	0 (0, 0)	0 (0, 0)	0 (0, 0)	0 (0, 0)	0 (0, 0)	0 (0, 0)	0 (0, 0)	0 (0, 0)	0 (0, 0)	0 (0, 0)	0 (0, 0)	0 (0, 0)	0 (0, 0)	0 (0, 0)	0 (0, 0)	0 (0, 0)	0 (0, 0)	0 (0, 0)	0 (0, 0)	0 (0, 0)	0 (0, 0)	0 (0, 0)	0 (0, 0)	0 (0, 0)	0 (0, 0)	0 (0, 0)	0 (0, 0)	0 (0, 0)
Langfang	Hebei	North	Female	5 y～	0 (0, 0)	0 (0, 0)	0 (0, 0)	0 (0, 0)	0 (0, 0)	0 (0, 0)	0 (0, 0)	0 (0, 0)	0 (0, 0)	0 (0, 0)	0 (0, 0)	0 (0, 0)	0 (0, 0)	0 (0, 0)	0 (0, 0)	0 (0, 0)	0 (0, 0)	0 (0, 0)	0 (0, 0)	0 (0, 0)	0 (0, 0)	0 (0, 0)	0 (0, 0)	0 (0, 0)	0 (0, 0)	0 (0, 0)	0 (0, 0)	0 (0, 0)
Langfang	Hebei	North	Female	10 y～	0 (0, 0)	0 (0, 0)	0 (0, 0)	0 (0, 0)	0 (0, 0)	0 (0, 0)	0 (0, 0)	0 (0, 0)	0 (0, 0)	0 (0, 0)	0 (0, 0)	0 (0, 0)	0 (0, 0)	0 (0, 0)	0 (0, 0)	0 (0, 0)	0 (0, 0)	0 (0, 0)	0 (0, 0)	0 (0, 0)	0 (0, 0)	0 (0, 0)	0 (0, 0)	0 (0, 0)	0 (0, 0)	0 (0, 0)	0 (0, 0)	0 (0, 0)
Langfang	Hebei	North	Female	15 y～	0 (0, 0)	0 (0, 0)	0 (0, 0)	0 (0, 0)	0 (0, 0)	0 (0, 0)	0 (0, 0)	0 (0, 0)	0 (0, 0)	0 (0, 0)	0 (0, 0)	0 (0, 0)	0 (0, 0)	0 (0, 0)	0 (0, 0)	0 (0, 0)	0 (0, 0)	0 (0, 0)	0 (0, 0)	0 (0, 0)	0 (0, 0)	0 (0, 0)	0 (0, 0)	0 (0, 0)	0 (0, 0)	0 (0, 0)	0 (0, 0)	0 (0, 0)
Langfang	Hebei	North	Female	20 y～	0 (0, 0)	0 (0, 0)	0 (0, 0)	0 (0, 0)	0 (0, 0)	0 (0, 0)	0 (0, 0)	0 (0, 0)	0 (0, 0)	0 (0, 0)	0 (0, 0)	0 (0, 0)	0 (0, 0)	0 (0, 0)	0 (0, 0)	0 (0, 0)	0 (0, 0)	0 (0, 0)	0 (0, 0)	0 (0, 0)	0 (0, 0)	0 (0, 0)	0 (0, 0)	0 (0, 0)	0 (0, 0)	0 (0, 0)	0 (0, 0)	0 (0, 0)
Langfang	Hebei	North	Female	25 y～	0 (0, 0)	0 (0, 0)	0 (0, 0)	0 (0, 0)	0 (0, 0)	0 (0, 0)	0 (0, 0)	0 (0, 0)	0 (0, 0)	0 (0, 0)	0 (0, 0)	0 (0, 0)	0 (0, 0)	0 (0, 0)	0 (0, 0)	0 (0, 0)	0 (0, 0)	0 (0, 0)	0 (0, 0)	0 (0, 0)	0 (0, 0)	0 (0, 0)	0 (0, 0)	0 (0, 0)	0 (0, 0)	0 (0, 0)	0 (0, 0)	0 (0, 0)
Langfang	Hebei	North	Female	30 y～	0 (0, 0)	0 (0, 0)	0 (0, 0)	0 (0, 0)	0 (0, 0)	0 (0, 0)	0 (0, 0)	0 (0, 0)	0 (0, 0)	0 (0, 0)	0 (0, 0)	0 (0, 0)	0 (0, 0)	0 (0, 0)	0 (0, 0)	0 (0, 0)	0 (0, 0)	0 (0, 0)	0 (0, 0)	0 (0, 0)	0 (0, 0)	0 (0, 0)	0 (0, 0)	0 (0, 0)	0 (0, 0)	0 (0, 0)	0 (0, 0)	1 (1, 1)
Langfang	Hebei	North	Female	35 y～	0 (0, 0)	0 (0, 0)	0 (0, 0)	0 (0, 0)	0 (0, 0)	0 (0, 0)	0 (0, 0)	0 (0, 0)	0 (0, 0)	0 (0, 0)	0 (0, 0)	0 (0, 0)	0 (0, 0)	0 (0, 0)	0 (0, 0)	0 (0, 0)	0 (0, 0)	0 (0, 0)	0 (0, 0)	0 (0, 0)	0 (0, 0)	0 (0, 0)	0 (0, 0)	1 (0, 1)	1 (0, 1)	1 (0, 1)	0 (0, 0)	1 (1, 1)
Langfang	Hebei	North	Female	40 y～	1 (0, 1)	1 (0, 1)	0 (0, 0)	1 (1, 1)	0 (0, 0)	0 (0, 0)	0 (0, 0)	0 (0, 0)	0 (0, 0)	0 (0, 0)	0 (0, 0)	1 (0, 1)	0 (0, 0)	0 (0, 0)	0 (0, 0)	0 (0, 0)	0 (0, 0)	0 (0, 0)	0 (0, 0)	0 (0, 0)	1 (0, 1)	0 (0, 1)	0 (0, 0)	1 (1, 1)	1 (1, 1)	1 (1, 1)	0 (0, 0)	3 (2, 3)
Langfang	Hebei	North	Female	45 y～	1 (1, 1)	1 (1, 1)	0 (0, 0)	2 (2, 2)	0 (0, 0)	0 (0, 0)	0 (0, 0)	0 (0, 0)	0 (0, 0)	0 (0, 1)	0 (0, 0)	1 (1, 1)	0 (0, 0)	0 (0, 0)	0 (0, 0)	0 (0, 0)	0 (0, 0)	0 (0, 0)	0 (0, 0)	0 (0, 0)	1 (1, 1)	1 (1, 1)	0 (0, 0)	2 (2, 2)	2 (2, 2)	2 (2, 3)	1 (0, 1)	5 (4, 6)
Langfang	Hebei	North	Female	50 y～	1 (1, 1)	1 (1, 1)	0 (0, 0)	2 (2, 2)	0 (0, 0)	0 (0, 0)	0 (0, 0)	0 (0, 0)	0 (0, 1)	1 (0, 1)	0 (0, 0)	1 (1, 1)	0 (0, 0)	0 (0, 0)	0 (0, 0)	0 (0, 0)	0 (0, 0)	0 (0, 0)	0 (0, 0)	0 (0, 0)	1 (1, 1)	1 (1, 1)	0 (0, 0)	3 (2, 3)	3 (2, 3)	3 (2, 3)	1 (1, 1)	6 (5, 7)
Langfang	Hebei	North	Female	55 y～	2 (2, 2)	2 (2, 2)	0 (0, 0)	4 (3, 5)	0 (0, 0)	0 (0, 0)	0 (0, 0)	0 (0, 0)	1 (1, 1)	1 (1, 2)	0 (0, 0)	2 (2, 3)	0 (0, 0)	0 (0, 0)	0 (0, 0)	0 (0, 0)	0 (0, 0)	0 (0, 0)	0 (0, 0)	0 (0, 0)	2 (2, 3)	2 (2, 3)	1 (0, 1)	5 (4, 6)	5 (5, 6)	6 (5, 7)	1 (1, 1)	12 (10, 14)
Langfang	Hebei	North	Female	60 y～	3 (2, 3)	3 (2, 3)	1 (1, 1)	6 (5, 7)	0 (0, 0)	0 (0, 0)	0 (0, 0)	0 (0, 0)	1 (1, 1)	1 (1, 2)	0 (0, 0)	3 (2, 4)	0 (0, 0)	0 (0, 0)	0 (0, 0)	1 (0, 1)	0 (0, 0)	0 (0, 0)	0 (0, 0)	0 (0, 0)	3 (3, 3)	3 (3, 3)	1 (1, 1)	7 (6, 7)	8 (6, 9)	8 (6, 9)	2 (1, 2)	17 (14, 19)
Langfang	Hebei	North	Female	65 y～	3 (3, 4)	3 (3, 3)	1 (1, 1)	7 (6, 8)	0 (0, 0)	0 (0, 0)	0 (0, 0)	1 (1, 1)	1 (1, 2)	2 (1, 2)	0 (0, 0)	3 (2, 4)	0 (0, 0)	0 (0, 0)	0 (0, 0)	1 (0, 1)	0 (0, 0)	0 (0, 0)	0 (0, 0)	1 (0, 1)	4 (3, 4)	3 (3, 4)	1 (1, 1)	8 (7, 9)	9 (7, 10)	9 (7, 10)	2 (2, 2)	20 (16, 23)
Langfang	Hebei	North	Female	70 y～	5 (4, 6)	5 (4, 6)	1 (1, 1)	11 (9, 13)	1 (0, 1)	1 (1, 1)	0 (0, 0)	1 (1, 2)	2 (1, 2)	2 (1, 2)	0 (0, 0)	4 (3, 5)	0 (0, 1)	1 (0, 1)	0 (0, 0)	1 (1, 1)	0 (0, 0)	0 (0, 0)	0 (0, 0)	1 (1, 1)	6 (5, 7)	6 (5, 6)	1 (1, 1)	13 (11, 14)	14 (11, 16)	14 (12, 16)	3 (3, 4)	31 (26, 36)
Langfang	Hebei	North	Female	75 y～	8 (6, 9)	7 (6, 9)	2 (1, 2)	17 (14, 20)	1 (1, 1)	1 (1, 1)	0 (0, 0)	2 (2, 3)	2 (1, 2)	2 (2, 3)	0 (0, 1)	5 (4, 6)	1 (1, 1)	1 (1, 1)	0 (0, 0)	2 (1, 2)	0 (0, 1)	1 (0, 1)	0 (0, 0)	1 (1, 1)	8 (7, 9)	8 (7, 9)	2 (2, 2)	18 (15, 20)	20 (16, 23)	20 (17, 23)	5 (4, 5)	45 (37, 52)
Langfang	Hebei	North	Female	80 y～	9 (7, 10)	8 (7, 9)	2 (2, 2)	19 (15, 22)	2 (1, 2)	1 (1, 2)	0 (0, 1)	3 (3, 4)	2 (1, 2)	2 (1, 2)	1 (0, 1)	4 (3, 5)	1 (1, 2)	1 (1, 1)	0 (0, 0)	3 (2, 3)	0 (0, 1)	0 (0, 1)	0 (0, 0)	1 (1, 1)	8 (7, 9)	8 (7, 9)	2 (2, 2)	18 (15, 20)	22 (18, 25)	21 (17, 24)	6 (5, 6)	48 (39, 56)
Langfang	Hebei	North	Female	85 y～	16 (13, 18)	15 (12, 17)	4 (3, 4)	35 (28, 40)	4 (3, 4)	3 (3, 4)	1 (1, 1)	8 (7, 9)	2 (1, 2)	2 (1, 2)	0 (0, 1)	4 (3, 5)	4 (3, 4)	3 (3, 4)	1 (1, 1)	8 (6, 10)	1 (1, 1)	1 (1, 1)	0 (0, 0)	2 (1, 2)	12 (10, 14)	11 (10, 13)	3 (2, 3)	26 (22, 30)	38 (31, 44)	35 (29, 41)	9 (8, 11)	82 (67, 96)
Qinhuangdao	Hebei	North	Male	0 y～	0 (0, 0)	0 (0, 0)	0 (0, 0)	0 (0, 0)	0 (0, 0)	0 (0, 0)	0 (0, 0)	0 (0, 0)	0 (0, 0)	0 (0, 0)	0 (0, 0)	0 (0, 0)	0 (0, 0)	0 (0, 0)	0 (0, 0)	0 (0, 0)	0 (0, 0)	0 (0, 0)	0 (0, 0)	0 (0, 0)	0 (0, 0)	0 (0, 0)	0 (0, 0)	0 (0, 0)	0 (0, 0)	0 (0, 0)	0 (0, 0)	0 (0, 0)
Qinhuangdao	Hebei	North	Male	1 y～	0 (0, 0)	0 (0, 0)	0 (0, 0)	0 (0, 0)	0 (0, 0)	0 (0, 0)	0 (0, 0)	0 (0, 0)	0 (0, 0)	0 (0, 0)	0 (0, 0)	0 (0, 0)	0 (0, 0)	0 (0, 0)	0 (0, 0)	0 (0, 0)	0 (0, 0)	0 (0, 0)	0 (0, 0)	0 (0, 0)	0 (0, 0)	0 (0, 0)	0 (0, 0)	0 (0, 0)	0 (0, 0)	0 (0, 0)	0 (0, 0)	0 (0, 0)
Qinhuangdao	Hebei	North	Male	5 y～	0 (0, 0)	0 (0, 0)	0 (0, 0)	0 (0, 0)	0 (0, 0)	0 (0, 0)	0 (0, 0)	0 (0, 0)	0 (0, 0)	0 (0, 0)	0 (0, 0)	0 (0, 0)	0 (0, 0)	0 (0, 0)	0 (0, 0)	0 (0, 0)	0 (0, 0)	0 (0, 0)	0 (0, 0)	0 (0, 0)	0 (0, 0)	0 (0, 0)	0 (0, 0)	0 (0, 0)	0 (0, 0)	0 (0, 0)	0 (0, 0)	0 (0, 0)
Qinhuangdao	Hebei	North	Male	10 y～	0 (0, 0)	0 (0, 0)	0 (0, 0)	0 (0, 0)	0 (0, 0)	0 (0, 0)	0 (0, 0)	0 (0, 0)	0 (0, 0)	0 (0, 0)	0 (0, 0)	0 (0, 0)	0 (0, 0)	0 (0, 0)	0 (0, 0)	0 (0, 0)	0 (0, 0)	0 (0, 0)	0 (0, 0)	0 (0, 0)	0 (0, 0)	0 (0, 0)	0 (0, 0)	0 (0, 0)	0 (0, 0)	0 (0, 0)	0 (0, 0)	0 (0, 0)
Qinhuangdao	Hebei	North	Male	15 y～	0 (0, 0)	0 (0, 0)	0 (0, 0)	0 (0, 0)	0 (0, 0)	0 (0, 0)	0 (0, 0)	0 (0, 0)	0 (0, 0)	0 (0, 0)	0 (0, 0)	0 (0, 0)	0 (0, 0)	0 (0, 0)	0 (0, 0)	0 (0, 0)	0 (0, 0)	0 (0, 0)	0 (0, 0)	0 (0, 0)	0 (0, 0)	0 (0, 0)	0 (0, 0)	1 (0, 1)	0 (0, 0)	0 (0, 0)	0 (0, 0)	1 (1, 1)
Qinhuangdao	Hebei	North	Male	20 y～	0 (0, 0)	0 (0, 0)	0 (0, 0)	1 (0, 1)	0 (0, 0)	0 (0, 0)	0 (0, 0)	0 (0, 0)	0 (0, 0)	0 (0, 0)	0 (0, 0)	0 (0, 0)	0 (0, 0)	0 (0, 0)	0 (0, 0)	0 (0, 0)	0 (0, 0)	0 (0, 0)	0 (0, 0)	0 (0, 0)	0 (0, 0)	0 (0, 0)	0 (0, 0)	0 (0, 1)	1 (0, 1)	0 (0, 1)	0 (0, 0)	1 (1, 1)
Qinhuangdao	Hebei	North	Male	25 y～	0 (0, 1)	0 (0, 0)	0 (0, 0)	1 (1, 1)	0 (0, 0)	0 (0, 0)	0 (0, 0)	0 (0, 0)	0 (0, 0)	0 (0, 0)	0 (0, 0)	0 (0, 0)	0 (0, 0)	0 (0, 0)	0 (0, 0)	0 (0, 0)	0 (0, 0)	0 (0, 0)	0 (0, 0)	0 (0, 0)	0 (0, 0)	0 (0, 0)	0 (0, 0)	1 (1, 1)	1 (1, 1)	1 (1, 1)	0 (0, 0)	2 (2, 2)
Qinhuangdao	Hebei	North	Male	30 y～	1 (1, 1)	1 (1, 1)	0 (0, 0)	2 (1, 2)	0 (0, 0)	0 (0, 0)	0 (0, 0)	0 (0, 0)	0 (0, 0)	0 (0, 0)	0 (0, 0)	0 (0, 0)	0 (0, 0)	0 (0, 0)	0 (0, 0)	0 (0, 0)	0 (0, 0)	0 (0, 0)	0 (0, 0)	0 (0, 0)	1 (1, 1)	1 (1, 1)	0 (0, 0)	1 (1, 2)	1 (1, 2)	1 (1, 1)	1 (0, 1)	3 (3, 4)
Qinhuangdao	Hebei	North	Male	35 y～	2 (2, 2)	2 (2, 2)	1 (1, 1)	5 (4, 5)	0 (0, 0)	0 (0, 0)	0 (0, 0)	0 (0, 0)	0 (0, 0)	0 (0, 0)	0 (0, 0)	0 (0, 0)	0 (0, 0)	0 (0, 0)	0 (0, 0)	0 (0, 0)	0 (0, 0)	0 (0, 0)	0 (0, 0)	0 (0, 0)	1 (1, 2)	1 (1, 1)	1 (0, 1)	3 (3, 4)	4 (3, 4)	3 (3, 4)	1 (1, 2)	8 (7, 9)
Qinhuangdao	Hebei	North	Male	40 y～	4 (3, 4)	3 (3, 4)	1 (1, 2)	8 (7, 9)	0 (0, 0)	0 (0, 0)	0 (0, 0)	0 (0, 0)	0 (0, 1)	0 (0, 0)	0 (0, 0)	1 (1, 1)	0 (0, 0)	0 (0, 0)	0 (0, 0)	0 (0, 1)	0 (0, 0)	0 (0, 0)	0 (0, 0)	0 (0, 0)	3 (3, 3)	3 (2, 3)	1 (1, 1)	7 (6, 8)	8 (6, 8)	7 (6, 7)	3 (2, 3)	17 (14, 19)
Qinhuangdao	Hebei	North	Male	45 y～	6 (5, 6)	5 (4, 5)	2 (2, 3)	13 (11, 14)	0 (0, 0)	0 (0, 0)	0 (0, 0)	0 (0, 0)	1 (1, 1)	1 (1, 1)	0 (0, 0)	2 (2, 2)	0 (0, 0)	0 (0, 0)	0 (0, 0)	1 (0, 1)	0 (0, 0)	0 (0, 0)	0 (0, 0)	0 (0, 0)	5 (5, 6)	4 (4, 5)	2 (2, 2)	12 (10, 13)	13 (11, 14)	10 (9, 11)	5 (4, 6)	28 (23, 31)
Qinhuangdao	Hebei	North	Male	50 y～	6 (5, 7)	5 (4, 6)	3 (2, 3)	14 (12, 16)	0 (0, 0)	0 (0, 0)	0 (0, 0)	0 (0, 0)	2 (1, 2)	1 (1, 2)	1 (0, 1)	4 (3, 5)	0 (0, 0)	0 (0, 0)	0 (0, 0)	1 (1, 1)	0 (0, 0)	0 (0, 0)	0 (0, 0)	1 (0, 1)	6 (5, 7)	5 (4, 5)	2 (2, 3)	13 (11, 15)	15 (12, 17)	12 (10, 13)	6 (5, 7)	32 (27, 37)
Qinhuangdao	Hebei	North	Male	55 y～	13 (11, 14)	11 (9, 12)	5 (4, 6)	29 (24, 32)	0 (0, 0)	0 (0, 0)	0 (0, 0)	1 (1, 1)	5 (4, 7)	4 (3, 5)	2 (1, 2)	11 (8, 14)	1 (1, 1)	0 (0, 1)	0 (0, 0)	1 (1, 2)	1 (0, 1)	0 (0, 0)	0 (0, 0)	1 (1, 1)	11 (10, 13)	9 (8, 11)	5 (4, 5)	25 (22, 29)	32 (26, 36)	25 (21, 29)	12 (10, 14)	69 (58, 79)
Qinhuangdao	Hebei	North	Male	60 y～	13 (11, 14)	11 (9, 12)	5 (4, 5)	28 (24, 32)	1 (1, 1)	1 (1, 1)	0 (0, 0)	2 (2, 2)	8 (6, 9)	5 (4, 6)	2 (2, 3)	15 (11, 19)	1 (1, 1)	1 (1, 1)	0 (0, 0)	2 (2, 3)	1 (0, 1)	0 (0, 0)	0 (0, 0)	1 (1, 1)	12 (11, 14)	11 (9, 12)	5 (4, 5)	28 (24, 32)	35 (29, 41)	29 (24, 33)	13 (11, 15)	77 (63, 88)
Qinhuangdao	Hebei	North	Male	65 y～	12 (10, 14)	11 (9, 12)	5 (4, 5)	28 (23, 31)	1 (1, 2)	1 (1, 1)	0 (0, 1)	3 (2, 3)	8 (6, 10)	6 (4, 7)	3 (2, 3)	16 (12, 20)	1 (1, 1)	1 (1, 1)	0 (0, 0)	2 (2, 3)	1 (1, 1)	0 (0, 0)	0 (0, 0)	1 (1, 1)	12 (10, 14)	10 (9, 12)	5 (4, 5)	27 (23, 31)	36 (29, 41)	29 (24, 33)	13 (11, 15)	78 (64, 90)
Qinhuangdao	Hebei	North	Male	70 y～	13 (11, 15)	12 (9, 13)	5 (4, 6)	30 (24, 35)	3 (2, 3)	2 (2, 2)	1 (1, 1)	6 (5, 7)	10 (7, 12)	7 (5, 8)	3 (2, 4)	19 (15, 23)	2 (1, 2)	1 (1, 1)	1 (0, 1)	3 (2, 4)	1 (1, 1)	1 (0, 1)	0 (0, 0)	2 (1, 2)	17 (14, 19)	14 (12, 16)	6 (5, 7)	37 (32, 42)	45 (36, 52)	36 (29, 42)	16 (13, 19)	97 (79, 113)
Qinhuangdao	Hebei	North	Male	75 y～	14 (11, 16)	12 (10, 14)	5 (4, 6)	32 (26, 37)	4 (3, 5)	3 (2, 3)	1 (1, 2)	8 (7, 9)	8 (6, 10)	6 (4, 7)	3 (2, 3)	16 (12, 20)	2 (2, 3)	2 (1, 2)	1 (1, 1)	5 (4, 6)	1 (1, 1)	1 (0, 1)	0 (0, 0)	2 (1, 2)	17 (15, 19)	15 (12, 17)	7 (6, 7)	38 (33, 43)	46 (38, 54)	37 (30, 43)	17 (14, 20)	101 (82, 117)
Qinhuangdao	Hebei	North	Male	80 y～	12 (10, 14)	11 (9, 12)	5 (4, 5)	27 (22, 31)	4 (3, 4)	3 (3, 4)	1 (1, 2)	9 (7, 10)	4 (3, 5)	4 (3, 5)	2 (1, 2)	10 (7, 12)	3 (2, 3)	2 (2, 3)	1 (1, 1)	6 (4, 7)	1 (0, 1)	1 (0, 1)	0 (0, 0)	1 (1, 1)	13 (11, 15)	11 (10, 13)	5 (4, 6)	29 (25, 33)	36 (29, 42)	32 (26, 37)	14 (11, 16)	82 (67, 95)
Qinhuangdao	Hebei	North	Male	85 y～	14 (11, 16)	12 (10, 14)	5 (4, 6)	32 (26, 37)	6 (5, 7)	5 (4, 6)	2 (2, 3)	13 (11, 15)	3 (2, 4)	3 (2, 3)	1 (1, 1)	7 (5, 8)	5 (4, 7)	5 (4, 6)	2 (2, 3)	12 (9, 15)	1 (1, 1)	1 (1, 1)	0 (0, 0)	2 (1, 2)	12 (10, 13)	10 (9, 12)	4 (4, 5)	27 (22, 30)	40 (33, 47)	36 (29, 42)	16 (13, 18)	92 (74, 108)
Qinhuangdao	Hebei	North	Female	0 y～	0 (0, 0)	0 (0, 0)	0 (0, 0)	0 (0, 0)	0 (0, 0)	0 (0, 0)	0 (0, 0)	0 (0, 0)	0 (0, 0)	0 (0, 0)	0 (0, 0)	0 (0, 0)	0 (0, 0)	0 (0, 0)	0 (0, 0)	0 (0, 0)	0 (0, 0)	0 (0, 0)	0 (0, 0)	0 (0, 0)	0 (0, 0)	0 (0, 0)	0 (0, 0)	0 (0, 0)	0 (0, 0)	0 (0, 0)	0 (0, 0)	0 (0, 0)
Qinhuangdao	Hebei	North	Female	1 y～	0 (0, 0)	0 (0, 0)	0 (0, 0)	0 (0, 0)	0 (0, 0)	0 (0, 0)	0 (0, 0)	0 (0, 0)	0 (0, 0)	0 (0, 0)	0 (0, 0)	0 (0, 0)	0 (0, 0)	0 (0, 0)	0 (0, 0)	0 (0, 0)	0 (0, 0)	0 (0, 0)	0 (0, 0)	0 (0, 0)	0 (0, 0)	0 (0, 0)	0 (0, 0)	0 (0, 0)	0 (0, 0)	0 (0, 0)	0 (0, 0)	0 (0, 0)
Qinhuangdao	Hebei	North	Female	5 y～	0 (0, 0)	0 (0, 0)	0 (0, 0)	0 (0, 0)	0 (0, 0)	0 (0, 0)	0 (0, 0)	0 (0, 0)	0 (0, 0)	0 (0, 0)	0 (0, 0)	0 (0, 0)	0 (0, 0)	0 (0, 0)	0 (0, 0)	0 (0, 0)	0 (0, 0)	0 (0, 0)	0 (0, 0)	0 (0, 0)	0 (0, 0)	0 (0, 0)	0 (0, 0)	0 (0, 0)	0 (0, 0)	0 (0, 0)	0 (0, 0)	0 (0, 0)
Qinhuangdao	Hebei	North	Female	10 y～	0 (0, 0)	0 (0, 0)	0 (0, 0)	0 (0, 0)	0 (0, 0)	0 (0, 0)	0 (0, 0)	0 (0, 0)	0 (0, 0)	0 (0, 0)	0 (0, 0)	0 (0, 0)	0 (0, 0)	0 (0, 0)	0 (0, 0)	0 (0, 0)	0 (0, 0)	0 (0, 0)	0 (0, 0)	0 (0, 0)	0 (0, 0)	0 (0, 0)	0 (0, 0)	0 (0, 0)	0 (0, 0)	0 (0, 0)	0 (0, 0)	0 (0, 0)
Qinhuangdao	Hebei	North	Female	15 y～	0 (0, 0)	0 (0, 0)	0 (0, 0)	0 (0, 0)	0 (0, 0)	0 (0, 0)	0 (0, 0)	0 (0, 0)	0 (0, 0)	0 (0, 0)	0 (0, 0)	0 (0, 0)	0 (0, 0)	0 (0, 0)	0 (0, 0)	0 (0, 0)	0 (0, 0)	0 (0, 0)	0 (0, 0)	0 (0, 0)	0 (0, 0)	0 (0, 0)	0 (0, 0)	0 (0, 0)	0 (0, 0)	0 (0, 0)	0 (0, 0)	1 (1, 1)
Qinhuangdao	Hebei	North	Female	20 y～	0 (0, 0)	0 (0, 0)	0 (0, 0)	0 (0, 0)	0 (0, 0)	0 (0, 0)	0 (0, 0)	0 (0, 0)	0 (0, 0)	0 (0, 0)	0 (0, 0)	0 (0, 0)	0 (0, 0)	0 (0, 0)	0 (0, 0)	0 (0, 0)	0 (0, 0)	0 (0, 0)	0 (0, 0)	0 (0, 0)	0 (0, 0)	0 (0, 0)	0 (0, 0)	0 (0, 0)	0 (0, 0)	0 (0, 0)	0 (0, 0)	1 (1, 1)
Qinhuangdao	Hebei	North	Female	25 y～	0 (0, 0)	0 (0, 0)	0 (0, 0)	0 (0, 0)	0 (0, 0)	0 (0, 0)	0 (0, 0)	0 (0, 0)	0 (0, 0)	0 (0, 0)	0 (0, 0)	0 (0, 0)	0 (0, 0)	0 (0, 0)	0 (0, 0)	0 (0, 0)	0 (0, 0)	0 (0, 0)	0 (0, 0)	0 (0, 0)	0 (0, 0)	0 (0, 0)	0 (0, 0)	0 (0, 0)	0 (0, 0)	0 (0, 0)	0 (0, 0)	1 (1, 1)
Qinhuangdao	Hebei	North	Female	30 y～	0 (0, 0)	0 (0, 0)	0 (0, 0)	0 (0, 1)	0 (0, 0)	0 (0, 0)	0 (0, 0)	0 (0, 0)	0 (0, 0)	0 (0, 0)	0 (0, 0)	0 (0, 0)	0 (0, 0)	0 (0, 0)	0 (0, 0)	0 (0, 0)	0 (0, 0)	0 (0, 0)	0 (0, 0)	0 (0, 0)	0 (0, 0)	0 (0, 0)	0 (0, 0)	0 (0, 0)	0 (0, 0)	1 (0, 1)	0 (0, 0)	1 (1, 1)
Qinhuangdao	Hebei	North	Female	35 y～	0 (0, 0)	0 (0, 0)	0 (0, 0)	1 (1, 1)	0 (0, 0)	0 (0, 0)	0 (0, 0)	0 (0, 0)	0 (0, 0)	0 (0, 0)	0 (0, 0)	0 (0, 0)	0 (0, 0)	0 (0, 0)	0 (0, 0)	0 (0, 0)	0 (0, 0)	0 (0, 0)	0 (0, 0)	0 (0, 0)	0 (0, 0)	0 (0, 0)	0 (0, 0)	1 (1, 1)	1 (1, 1)	1 (1, 1)	0 (0, 0)	2 (2, 2)
Qinhuangdao	Hebei	North	Female	40 y～	1 (1, 1)	1 (1, 1)	0 (0, 0)	2 (2, 2)	0 (0, 0)	0 (0, 0)	0 (0, 0)	0 (0, 0)	0 (0, 0)	0 (0, 1)	0 (0, 0)	1 (1, 1)	0 (0, 0)	0 (0, 0)	0 (0, 0)	0 (0, 0)	0 (0, 0)	0 (0, 0)	0 (0, 0)	0 (0, 0)	1 (1, 1)	1 (1, 1)	0 (0, 0)	2 (2, 2)	2 (2, 2)	2 (2, 3)	1 (0, 1)	5 (4, 5)
Qinhuangdao	Hebei	North	Female	45 y～	1 (1, 1)	1 (1, 2)	0 (0, 0)	3 (2, 3)	0 (0, 0)	0 (0, 0)	0 (0, 0)	0 (0, 0)	0 (0, 1)	1 (1, 1)	0 (0, 0)	1 (1, 2)	0 (0, 0)	0 (0, 0)	0 (0, 0)	0 (0, 0)	0 (0, 0)	0 (0, 0)	0 (0, 0)	0 (0, 0)	1 (1, 2)	2 (1, 2)	0 (0, 0)	3 (3, 4)	3 (3, 4)	4 (3, 5)	1 (1, 1)	8 (7, 9)
Qinhuangdao	Hebei	North	Female	50 y～	1 (1, 2)	2 (1, 2)	0 (0, 0)	3 (3, 4)	0 (0, 0)	0 (0, 0)	0 (0, 0)	0 (0, 0)	1 (0, 1)	1 (1, 1)	0 (0, 0)	2 (1, 2)	0 (0, 0)	0 (0, 0)	0 (0, 0)	0 (0, 0)	0 (0, 0)	0 (0, 0)	0 (0, 0)	0 (0, 0)	2 (2, 2)	2 (2, 2)	0 (0, 0)	4 (4, 5)	4 (3, 5)	5 (4, 6)	1 (1, 1)	10 (8, 11)
Qinhuangdao	Hebei	North	Female	55 y～	3 (2, 3)	3 (3, 4)	1 (1, 1)	7 (6, 7)	0 (0, 0)	0 (0, 0)	0 (0, 0)	0 (0, 0)	1 (1, 2)	2 (2, 3)	0 (0, 0)	4 (3, 5)	0 (0, 0)	0 (0, 0)	0 (0, 0)	0 (0, 1)	0 (0, 0)	0 (0, 0)	0 (0, 0)	1 (0, 1)	3 (3, 4)	4 (3, 5)	1 (1, 1)	8 (7, 9)	8 (7, 9)	10 (8, 12)	2 (2, 2)	20 (17, 23)
Qinhuangdao	Hebei	North	Female	60 y～	4 (3, 5)	5 (4, 5)	1 (1, 1)	10 (8, 11)	0 (0, 0)	0 (0, 0)	0 (0, 0)	1 (1, 1)	2 (1, 2)	3 (2, 3)	0 (0, 1)	5 (4, 6)	0 (0, 0)	0 (0, 1)	0 (0, 0)	1 (1, 1)	0 (0, 0)	0 (0, 0)	0 (0, 0)	1 (1, 1)	4 (4, 5)	5 (4, 6)	1 (1, 1)	11 (9, 12)	11 (9, 13)	14 (11, 16)	3 (2, 3)	28 (23, 32)
Qinhuangdao	Hebei	North	Female	65 y～	5 (4, 5)	6 (5, 6)	1 (1, 1)	12 (10, 13)	0 (0, 0)	1 (0, 1)	0 (0, 0)	1 (1, 1)	2 (1, 2)	3 (2, 3)	1 (0, 1)	5 (4, 6)	0 (0, 0)	1 (0, 1)	0 (0, 0)	1 (1, 1)	0 (0, 0)	0 (0, 1)	0 (0, 0)	1 (1, 1)	5 (4, 6)	6 (5, 7)	1 (1, 1)	13 (11, 14)	13 (11, 15)	16 (13, 18)	3 (3, 4)	32 (27, 37)
Qinhuangdao	Hebei	North	Female	70 y～	8 (6, 9)	9 (7, 10)	2 (2, 2)	18 (15, 21)	1 (1, 1)	1 (1, 1)	0 (0, 0)	2 (2, 3)	2 (2, 3)	3 (3, 4)	1 (0, 1)	6 (5, 8)	1 (0, 1)	1 (1, 1)	0 (0, 0)	2 (1, 2)	0 (0, 1)	1 (1, 1)	0 (0, 0)	1 (1, 2)	9 (7, 10)	10 (9, 11)	2 (2, 2)	21 (18, 23)	20 (17, 23)	25 (21, 29)	5 (4, 6)	51 (42, 58)
Qinhuangdao	Hebei	North	Female	75 y～	11 (9, 13)	13 (11, 16)	3 (2, 3)	28 (22, 32)	1 (1, 2)	2 (2, 2)	0 (0, 0)	4 (3, 4)	3 (2, 3)	4 (3, 5)	1 (1, 1)	8 (6, 9)	1 (1, 1)	1 (1, 2)	0 (0, 0)	3 (2, 3)	1 (1, 1)	1 (1, 1)	0 (0, 0)	2 (1, 2)	12 (10, 14)	14 (12, 16)	3 (3, 3)	29 (25, 33)	29 (24, 34)	36 (30, 42)	7 (6, 9)	73 (60, 84)
Qinhuangdao	Hebei	North	Female	80 y～	13 (10, 15)	15 (12, 17)	3 (3, 4)	31 (25, 36)	2 (2, 3)	3 (2, 3)	1 (1, 1)	6 (5, 7)	3 (2, 3)	3 (2, 4)	1 (1, 1)	6 (5, 8)	2 (1, 2)	2 (2, 3)	1 (0, 1)	4 (3, 6)	1 (1, 1)	1 (1, 1)	0 (0, 0)	2 (1, 2)	12 (10, 14)	14 (11, 15)	3 (3, 4)	29 (24, 33)	32 (26, 38)	37 (30, 43)	9 (7, 11)	78 (63, 91)
Qinhuangdao	Hebei	North	Female	85 y～	23 (19, 27)	26 (21, 31)	6 (5, 7)	56 (45, 66)	5 (4, 6)	6 (5, 7)	2 (1, 2)	13 (11, 15)	3 (2, 3)	3 (2, 4)	1 (1, 1)	6 (5, 8)	5 (4, 7)	6 (4, 8)	2 (1, 2)	13 (10, 16)	1 (1, 1)	1 (1, 1)	0 (0, 0)	3 (2, 3)	18 (15, 20)	20 (17, 23)	5 (4, 5)	42 (36, 48)	55 (45, 65)	62 (50, 73)	16 (13, 18)	133 (108, 156)
Shijianzhuang	Hebei	North	Male	0 y～	0 (0, 0)	0 (0, 0)	0 (0, 0)	0 (0, 0)	0 (0, 0)	0 (0, 0)	0 (0, 0)	0 (0, 0)	0 (0, 0)	0 (0, 0)	0 (0, 0)	0 (0, 0)	1 (0, 1)	0 (0, 0)	0 (0, 0)	1 (1, 1)	0 (0, 0)	0 (0, 0)	0 (0, 0)	0 (0, 0)	0 (0, 0)	0 (0, 0)	0 (0, 0)	0 (0, 0)	1 (0, 1)	0 (0, 0)	0 (0, 0)	1 (1, 1)
Shijianzhuang	Hebei	North	Male	1 y～	0 (0, 0)	0 (0, 0)	0 (0, 0)	0 (0, 0)	0 (0, 0)	0 (0, 0)	0 (0, 0)	0 (0, 0)	0 (0, 0)	0 (0, 0)	0 (0, 0)	0 (0, 0)	0 (0, 1)	0 (0, 0)	0 (0, 0)	1 (1, 1)	0 (0, 0)	0 (0, 0)	0 (0, 0)	0 (0, 0)	0 (0, 0)	0 (0, 0)	0 (0, 0)	0 (0, 0)	0 (0, 1)	0 (0, 0)	0 (0, 0)	1 (1, 1)
Shijianzhuang	Hebei	North	Male	5 y～	0 (0, 0)	0 (0, 0)	0 (0, 0)	0 (0, 0)	0 (0, 0)	0 (0, 0)	0 (0, 0)	0 (0, 0)	0 (0, 0)	0 (0, 0)	0 (0, 0)	0 (0, 0)	0 (0, 0)	0 (0, 0)	0 (0, 0)	1 (0, 1)	0 (0, 0)	0 (0, 0)	0 (0, 0)	0 (0, 0)	0 (0, 0)	0 (0, 0)	0 (0, 0)	0 (0, 0)	0 (0, 1)	0 (0, 0)	0 (0, 0)	1 (1, 1)
Shijianzhuang	Hebei	North	Male	10 y～	0 (0, 0)	0 (0, 0)	0 (0, 0)	0 (0, 0)	0 (0, 0)	0 (0, 0)	0 (0, 0)	0 (0, 0)	0 (0, 0)	0 (0, 0)	0 (0, 0)	0 (0, 0)	0 (0, 0)	0 (0, 0)	0 (0, 0)	0 (0, 0)	0 (0, 0)	0 (0, 0)	0 (0, 0)	0 (0, 0)	0 (0, 0)	0 (0, 0)	0 (0, 0)	1 (1, 1)	1 (0, 1)	0 (0, 0)	0 (0, 0)	1 (1, 1)
Shijianzhuang	Hebei	North	Male	15 y～	0 (0, 0)	0 (0, 0)	0 (0, 0)	1 (1, 1)	0 (0, 0)	0 (0, 0)	0 (0, 0)	0 (0, 0)	0 (0, 0)	0 (0, 0)	0 (0, 0)	0 (0, 0)	0 (0, 0)	0 (0, 0)	0 (0, 0)	0 (0, 0)	0 (0, 0)	0 (0, 0)	0 (0, 0)	0 (0, 0)	1 (1, 1)	1 (1, 1)	0 (0, 0)	2 (2, 2)	2 (1, 2)	1 (1, 1)	0 (0, 0)	3 (3, 3)
Shijianzhuang	Hebei	North	Male	20 y～	1 (1, 1)	1 (1, 1)	0 (0, 0)	2 (2, 2)	0 (0, 0)	0 (0, 0)	0 (0, 0)	0 (0, 0)	0 (0, 0)	0 (0, 0)	0 (0, 0)	0 (0, 0)	0 (0, 0)	0 (0, 0)	0 (0, 0)	1 (0, 1)	0 (0, 0)	0 (0, 0)	0 (0, 0)	0 (0, 0)	1 (1, 1)	1 (0, 1)	0 (0, 0)	1 (1, 2)	2 (2, 2)	1 (1, 2)	0 (0, 0)	4 (3, 4)
Shijianzhuang	Hebei	North	Male	25 y～	2 (2, 2)	1 (1, 1)	0 (0, 0)	3 (3, 4)	0 (0, 0)	0 (0, 0)	0 (0, 0)	0 (0, 0)	0 (0, 0)	0 (0, 0)	0 (0, 0)	0 (0, 0)	0 (0, 0)	0 (0, 0)	0 (0, 0)	0 (0, 0)	0 (0, 0)	0 (0, 0)	0 (0, 0)	0 (0, 0)	1 (1, 1)	1 (1, 1)	0 (0, 0)	2 (2, 2)	3 (3, 3)	2 (2, 2)	1 (1, 1)	6 (5, 6)
Shijianzhuang	Hebei	North	Male	30 y～	2 (2, 3)	2 (2, 2)	1 (0, 1)	5 (4, 5)	0 (0, 0)	0 (0, 0)	0 (0, 0)	0 (0, 0)	0 (0, 0)	0 (0, 0)	0 (0, 0)	0 (0, 0)	0 (0, 0)	0 (0, 0)	0 (0, 0)	0 (0, 0)	0 (0, 0)	0 (0, 0)	0 (0, 0)	0 (0, 0)	2 (2, 3)	2 (1, 2)	0 (0, 1)	4 (4, 5)	5 (4, 6)	4 (3, 4)	1 (1, 1)	10 (9, 11)
Shijianzhuang	Hebei	North	Male	35 y～	7 (6, 8)	5 (5, 6)	2 (1, 2)	14 (12, 15)	0 (0, 0)	0 (0, 0)	0 (0, 0)	0 (0, 0)	1 (0, 1)	0 (0, 0)	0 (0, 0)	1 (1, 1)	0 (0, 0)	0 (0, 0)	0 (0, 0)	1 (0, 1)	0 (0, 0)	0 (0, 0)	0 (0, 0)	0 (0, 0)	5 (5, 6)	4 (3, 4)	1 (1, 1)	10 (9, 11)	14 (12, 15)	10 (8, 11)	3 (2, 3)	26 (23, 29)
Shijianzhuang	Hebei	North	Male	40 y～	14 (12, 15)	10 (9, 11)	3 (2, 3)	26 (23, 29)	0 (0, 0)	0 (0, 0)	0 (0, 0)	0 (0, 0)	2 (1, 2)	1 (1, 1)	0 (0, 0)	3 (2, 3)	1 (1, 1)	0 (0, 1)	0 (0, 0)	1 (1, 2)	0 (0, 0)	0 (0, 0)	0 (0, 0)	1 (1, 1)	11 (10, 12)	8 (7, 9)	2 (2, 3)	21 (19, 24)	28 (24, 31)	19 (17, 21)	6 (5, 6)	53 (46, 58)
Shijianzhuang	Hebei	North	Male	45 y～	21 (18, 23)	14 (12, 15)	5 (4, 5)	40 (34, 43)	0 (0, 0)	0 (0, 0)	0 (0, 0)	1 (1, 1)	4 (3, 4)	2 (2, 3)	1 (1, 1)	6 (5, 8)	1 (1, 1)	1 (0, 1)	0 (0, 0)	2 (1, 2)	1 (1, 1)	0 (0, 0)	0 (0, 0)	1 (1, 1)	19 (17, 22)	13 (11, 14)	4 (4, 5)	37 (32, 41)	46 (39, 51)	30 (26, 33)	10 (9, 11)	86 (74, 96)
Shijianzhuang	Hebei	North	Male	50 y～	23 (20, 25)	16 (13, 17)	5 (5, 6)	44 (38, 48)	1 (1, 1)	0 (0, 0)	0 (0, 0)	1 (1, 1)	6 (5, 8)	4 (3, 5)	1 (1, 2)	12 (9, 14)	1 (1, 2)	1 (1, 1)	0 (0, 0)	2 (2, 3)	1 (1, 1)	1 (0, 1)	0 (0, 0)	2 (1, 2)	21 (19, 24)	14 (13, 16)	5 (4, 5)	41 (35, 45)	54 (46, 61)	35 (30, 40)	12 (10, 14)	102 (87, 114)
Shijianzhuang	Hebei	North	Male	55 y～	48 (41, 52)	32 (28, 35)	11 (9, 12)	91 (78, 99)	2 (1, 2)	1 (1, 1)	0 (0, 0)	3 (2, 3)	20 (15, 24)	11 (9, 14)	4 (3, 5)	35 (27, 43)	3 (2, 3)	2 (1, 2)	1 (0, 1)	5 (4, 6)	2 (2, 2)	1 (1, 1)	0 (0, 0)	3 (3, 4)	42 (37, 47)	28 (25, 32)	10 (8, 11)	80 (69, 90)	116 (98, 131)	75 (64, 85)	26 (22, 29)	217 (183, 244)
Shijianzhuang	Hebei	North	Male	60 y～	47 (40, 52)	33 (28, 36)	10 (9, 11)	90 (77, 99)	4 (3, 4)	2 (2, 2)	1 (1, 1)	6 (5, 7)	27 (21, 33)	15 (12, 19)	5 (4, 6)	48 (36, 58)	4 (3, 5)	2 (2, 3)	1 (1, 1)	7 (5, 9)	2 (2, 2)	1 (1, 1)	0 (0, 0)	4 (3, 4)	46 (40, 52)	32 (28, 36)	10 (9, 11)	88 (76, 100)	131 (109, 149)	86 (72, 97)	27 (23, 31)	243 (203, 276)
Shijianzhuang	Hebei	North	Male	65 y～	46 (39, 51)	32 (27, 35)	10 (9, 11)	88 (75, 97)	5 (5, 6)	3 (3, 4)	1 (1, 1)	9 (8, 11)	29 (22, 36)	17 (12, 20)	5 (4, 7)	51 (39, 63)	4 (3, 5)	2 (2, 3)	1 (1, 1)	8 (6, 9)	2 (2, 2)	1 (1, 1)	0 (0, 0)	4 (3, 4)	45 (39, 51)	31 (27, 35)	10 (8, 11)	86 (74, 97)	132 (110, 151)	86 (72, 98)	27 (23, 31)	246 (205, 281)
Shijianzhuang	Hebei	North	Male	70 y～	50 (41, 56)	34 (28, 39)	11 (9, 12)	95 (78, 107)	11 (9, 12)	6 (5, 7)	2 (2, 2)	19 (16, 22)	35 (26, 42)	20 (15, 24)	7 (5, 8)	61 (46, 74)	6 (5, 8)	3 (3, 4)	1 (1, 1)	11 (8, 13)	3 (2, 3)	1 (1, 2)	0 (0, 1)	5 (4, 5)	63 (54, 70)	43 (37, 48)	14 (12, 15)	120 (103, 133)	166 (137, 191)	108 (89, 124)	34 (28, 40)	309 (255, 355)
Shijianzhuang	Hebei	North	Male	75 y～	52 (43, 59)	36 (30, 41)	11 (9, 13)	100 (82, 113)	15 (13, 17)	8 (7, 10)	3 (2, 3)	26 (22, 30)	29 (22, 35)	16 (12, 20)	5 (4, 7)	51 (38, 62)	9 (7, 11)	5 (4, 6)	2 (1, 2)	16 (13, 20)	3 (2, 3)	2 (1, 2)	1 (0, 1)	5 (4, 6)	64 (55, 72)	44 (38, 50)	14 (12, 16)	123 (106, 137)	173 (142, 199)	112 (93, 129)	36 (29, 41)	321 (265, 369)
Shijianzhuang	Hebei	North	Male	80 y～	44 (36, 50)	31 (25, 35)	9 (8, 11)	85 (69, 96)	14 (12, 17)	10 (8, 12)	3 (3, 4)	27 (23, 32)	16 (12, 19)	11 (8, 13)	3 (3, 4)	30 (23, 37)	10 (8, 12)	7 (5, 9)	2 (2, 3)	19 (15, 23)	2 (2, 2)	1 (1, 2)	0 (0, 1)	4 (3, 4)	49 (42, 55)	34 (29, 38)	10 (9, 11)	93 (80, 104)	135 (111, 155)	95 (78, 109)	29 (24, 33)	258 (213, 297)
Shijianzhuang	Hebei	North	Male	85 y～	52 (42, 60)	37 (30, 42)	11 (9, 13)	100 (81, 114)	21 (18, 25)	15 (13, 17)	5 (4, 5)	41 (35, 47)	11 (8, 13)	8 (6, 9)	2 (2, 3)	21 (16, 26)	20 (16, 25)	14 (11, 17)	4 (3, 6)	39 (30, 48)	2 (2, 3)	2 (1, 2)	1 (0, 1)	5 (4, 5)	44 (38, 50)	31 (26, 35)	9 (8, 10)	84 (72, 95)	151 (124, 176)	106 (87, 123)	32 (27, 38)	290 (238, 336)
Shijianzhuang	Hebei	North	Female	0 y～	0 (0, 0)	0 (0, 0)	0 (0, 0)	0 (0, 0)	0 (0, 0)	0 (0, 0)	0 (0, 0)	0 (0, 0)	0 (0, 0)	0 (0, 0)	0 (0, 0)	0 (0, 0)	0 (0, 0)	0 (0, 0)	0 (0, 0)	0 (0, 0)	0 (0, 0)	0 (0, 0)	0 (0, 0)	0 (0, 0)	0 (0, 0)	0 (0, 0)	0 (0, 0)	0 (0, 0)	0 (0, 0)	0 (0, 0)	0 (0, 0)	0 (0, 0)
Shijianzhuang	Hebei	North	Female	1 y～	0 (0, 0)	0 (0, 0)	0 (0, 0)	0 (0, 0)	0 (0, 0)	0 (0, 0)	0 (0, 0)	0 (0, 0)	0 (0, 0)	0 (0, 0)	0 (0, 0)	0 (0, 0)	0 (0, 1)	0 (0, 0)	0 (0, 0)	1 (1, 1)	0 (0, 0)	0 (0, 0)	0 (0, 0)	0 (0, 0)	0 (0, 0)	0 (0, 0)	0 (0, 0)	0 (0, 0)	1 (0, 1)	0 (0, 0)	0 (0, 0)	1 (1, 1)
Shijianzhuang	Hebei	North	Female	5 y～	0 (0, 0)	0 (0, 0)	0 (0, 0)	0 (0, 0)	0 (0, 0)	0 (0, 0)	0 (0, 0)	0 (0, 0)	0 (0, 0)	0 (0, 0)	0 (0, 0)	0 (0, 0)	0 (0, 0)	0 (0, 0)	0 (0, 0)	0 (0, 0)	0 (0, 0)	0 (0, 0)	0 (0, 0)	0 (0, 0)	0 (0, 0)	0 (0, 0)	0 (0, 0)	0 (0, 0)	0 (0, 0)	0 (0, 0)	0 (0, 0)	0 (0, 1)
Shijianzhuang	Hebei	North	Female	10 y～	0 (0, 0)	0 (0, 0)	0 (0, 0)	0 (0, 0)	0 (0, 0)	0 (0, 0)	0 (0, 0)	0 (0, 0)	0 (0, 0)	0 (0, 0)	0 (0, 0)	0 (0, 0)	0 (0, 0)	0 (0, 0)	0 (0, 0)	0 (0, 0)	0 (0, 0)	0 (0, 0)	0 (0, 0)	0 (0, 0)	0 (0, 0)	0 (0, 0)	0 (0, 0)	1 (1, 1)	0 (0, 1)	0 (0, 0)	0 (0, 0)	1 (1, 1)
Shijianzhuang	Hebei	North	Female	15 y～	0 (0, 0)	0 (0, 0)	0 (0, 0)	0 (0, 0)	0 (0, 0)	0 (0, 0)	0 (0, 0)	0 (0, 0)	0 (0, 0)	0 (0, 0)	0 (0, 0)	0 (0, 0)	0 (0, 0)	0 (0, 0)	0 (0, 0)	0 (0, 0)	0 (0, 0)	0 (0, 0)	0 (0, 0)	0 (0, 0)	1 (1, 1)	1 (0, 1)	0 (0, 0)	1 (1, 1)	1 (1, 1)	1 (1, 1)	0 (0, 0)	2 (2, 2)
Shijianzhuang	Hebei	North	Female	20 y～	0 (0, 0)	0 (0, 0)	0 (0, 0)	0 (0, 0)	0 (0, 0)	0 (0, 0)	0 (0, 0)	0 (0, 0)	0 (0, 0)	0 (0, 0)	0 (0, 0)	0 (0, 0)	0 (0, 0)	0 (0, 0)	0 (0, 0)	0 (0, 0)	0 (0, 0)	0 (0, 0)	0 (0, 0)	0 (0, 0)	1 (0, 1)	0 (0, 0)	0 (0, 0)	1 (1, 1)	1 (1, 1)	1 (1, 1)	0 (0, 0)	2 (2, 2)
Shijianzhuang	Hebei	North	Female	25 y～	0 (0, 0)	0 (0, 0)	0 (0, 0)	1 (1, 1)	0 (0, 0)	0 (0, 0)	0 (0, 0)	0 (0, 0)	0 (0, 0)	0 (0, 0)	0 (0, 0)	0 (0, 0)	0 (0, 0)	0 (0, 0)	0 (0, 0)	0 (0, 0)	0 (0, 0)	0 (0, 0)	0 (0, 0)	0 (0, 0)	0 (0, 0)	0 (0, 0)	0 (0, 0)	1 (1, 1)	1 (1, 1)	1 (1, 1)	0 (0, 0)	2 (2, 2)
Shijianzhuang	Hebei	North	Female	30 y～	1 (1, 1)	1 (1, 1)	0 (0, 0)	1 (1, 2)	0 (0, 0)	0 (0, 0)	0 (0, 0)	0 (0, 0)	0 (0, 0)	0 (0, 0)	0 (0, 0)	0 (0, 0)	0 (0, 0)	0 (0, 0)	0 (0, 0)	0 (0, 0)	0 (0, 0)	0 (0, 0)	0 (0, 0)	0 (0, 0)	1 (1, 1)	1 (0, 1)	0 (0, 0)	1 (1, 1)	2 (1, 2)	1 (1, 2)	0 (0, 0)	3 (3, 4)
Shijianzhuang	Hebei	North	Female	35 y～	1 (1, 1)	1 (1, 1)	0 (0, 0)	2 (2, 2)	0 (0, 0)	0 (0, 0)	0 (0, 0)	0 (0, 0)	1 (0, 1)	1 (0, 1)	0 (0, 0)	1 (1, 1)	0 (0, 0)	0 (0, 0)	0 (0, 0)	0 (0, 0)	0 (0, 0)	0 (0, 0)	0 (0, 0)	0 (0, 0)	1 (1, 1)	1 (1, 1)	0 (0, 0)	3 (2, 3)	3 (3, 3)	3 (2, 3)	0 (0, 0)	6 (5, 7)
Shijianzhuang	Hebei	North	Female	40 y～	3 (3, 3)	3 (2, 3)	0 (0, 0)	6 (5, 6)	0 (0, 0)	0 (0, 0)	0 (0, 0)	0 (0, 0)	1 (1, 1)	1 (1, 1)	0 (0, 0)	3 (2, 3)	0 (0, 0)	0 (0, 0)	0 (0, 0)	0 (0, 1)	0 (0, 0)	0 (0, 0)	0 (0, 0)	0 (0, 0)	3 (2, 3)	2 (2, 3)	0 (0, 0)	6 (5, 6)	7 (6, 8)	6 (5, 7)	1 (1, 1)	15 (12, 16)
Shijianzhuang	Hebei	North	Female	45 y～	4 (4, 5)	4 (3, 4)	1 (1, 1)	9 (8, 10)	0 (0, 0)	0 (0, 0)	0 (0, 0)	0 (0, 0)	2 (1, 2)	2 (2, 3)	0 (0, 0)	4 (3, 5)	0 (0, 1)	1 (0, 1)	0 (0, 0)	1 (1, 1)	0 (0, 0)	0 (0, 0)	0 (0, 0)	0 (0, 0)	5 (4, 6)	4 (4, 5)	1 (1, 1)	10 (9, 11)	12 (10, 14)	11 (10, 13)	2 (1, 2)	25 (21, 28)
Shijianzhuang	Hebei	North	Female	50 y～	5 (5, 6)	5 (4, 5)	1 (1, 1)	10 (9, 11)	0 (0, 0)	0 (0, 0)	0 (0, 0)	1 (0, 1)	2 (2, 3)	3 (2, 3)	0 (0, 0)	6 (4, 7)	0 (0, 0)	0 (0, 0)	0 (0, 0)	1 (1, 1)	0 (0, 0)	0 (0, 0)	0 (0, 0)	1 (0, 1)	7 (6, 7)	6 (5, 6)	1 (1, 1)	13 (11, 15)	15 (13, 17)	14 (12, 16)	2 (2, 2)	31 (26, 35)
Shijianzhuang	Hebei	North	Female	55 y～	10 (9, 11)	9 (8, 10)	1 (1, 2)	21 (18, 23)	0 (0, 0)	0 (0, 1)	0 (0, 0)	1 (1, 1)	5 (4, 6)	6 (5, 8)	1 (1, 1)	12 (9, 15)	1 (1, 1)	1 (1, 1)	0 (0, 0)	2 (1, 2)	1 (1, 1)	1 (1, 1)	0 (0, 0)	2 (1, 2)	13 (11, 15)	11 (10, 13)	2 (1, 2)	26 (23, 29)	30 (26, 34)	28 (24, 32)	4 (4, 5)	63 (53, 71)
Shijianzhuang	Hebei	North	Female	60 y～	15 (13, 17)	13 (11, 15)	2 (2, 2)	31 (26, 34)	1 (1, 1)	1 (1, 1)	0 (0, 0)	2 (2, 2)	6 (5, 8)	8 (6, 9)	1 (1, 1)	15 (11, 18)	1 (1, 2)	1 (1, 2)	0 (0, 0)	3 (2, 4)	1 (1, 1)	1 (1, 1)	0 (0, 0)	2 (2, 2)	17 (14, 19)	15 (13, 16)	2 (2, 3)	34 (29, 38)	42 (35, 47)	39 (33, 44)	6 (5, 6)	86 (72, 98)
Shijianzhuang	Hebei	North	Female	65 y～	18 (15, 20)	16 (13, 17)	2 (2, 3)	36 (31, 40)	1 (1, 2)	2 (1, 2)	0 (0, 0)	3 (3, 4)	7 (5, 9)	8 (6, 10)	1 (1, 1)	16 (12, 20)	1 (1, 2)	2 (1, 2)	0 (0, 0)	3 (2, 4)	1 (1, 1)	1 (1, 2)	0 (0, 0)	3 (2, 3)	20 (17, 22)	17 (15, 19)	3 (2, 3)	39 (34, 44)	49 (41, 55)	46 (38, 52)	6 (5, 7)	101 (84, 114)
Shijianzhuang	Hebei	North	Female	70 y～	29 (23, 32)	25 (20, 28)	4 (3, 4)	57 (47, 65)	3 (3, 4)	4 (3, 4)	0 (0, 0)	7 (6, 8)	9 (6, 10)	10 (8, 12)	1 (1, 1)	20 (15, 24)	2 (2, 3)	3 (2, 3)	0 (0, 0)	6 (4, 7)	2 (1, 2)	2 (2, 2)	0 (0, 0)	4 (3, 5)	33 (28, 36)	28 (25, 32)	4 (4, 5)	65 (56, 73)	77 (64, 88)	72 (59, 82)	10 (9, 12)	159 (132, 182)
Shijianzhuang	Hebei	North	Female	75 y～	43 (35, 49)	38 (31, 43)	6 (5, 7)	87 (71, 99)	5 (4, 6)	6 (5, 7)	1 (1, 1)	12 (10, 14)	10 (8, 13)	12 (9, 15)	1 (1, 2)	24 (18, 29)	4 (3, 5)	5 (4, 6)	1 (0, 1)	9 (7, 11)	2 (2, 3)	3 (2, 3)	0 (0, 0)	5 (4, 6)	46 (39, 51)	40 (34, 45)	6 (5, 7)	92 (79, 103)	111 (92, 127)	103 (85, 118)	15 (12, 17)	229 (190, 262)
Shijianzhuang	Hebei	North	Female	80 y～	49 (40, 56)	42 (34, 47)	7 (6, 8)	97 (79, 111)	9 (7, 10)	8 (6, 9)	2 (1, 2)	18 (15, 21)	10 (8, 12)	9 (6, 10)	2 (1, 2)	20 (15, 25)	7 (5, 9)	6 (5, 8)	1 (1, 2)	14 (11, 18)	3 (2, 3)	2 (2, 3)	0 (0, 1)	5 (4, 6)	46 (40, 52)	39 (34, 44)	7 (6, 7)	92 (79, 104)	124 (102, 142)	105 (87, 121)	19 (15, 22)	248 (204, 285)
Shijianzhuang	Hebei	North	Female	85 y～	89 (72, 102)	76 (61, 87)	13 (10, 15)	178 (144, 204)	20 (17, 24)	18 (15, 20)	4 (3, 4)	42 (35, 48)	10 (7, 12)	8 (6, 10)	2 (1, 2)	20 (15, 24)	20 (16, 26)	18 (14, 22)	4 (3, 5)	42 (32, 52)	4 (3, 5)	4 (3, 4)	1 (1, 1)	8 (7, 10)	68 (58, 77)	58 (49, 66)	10 (8, 11)	136 (116, 154)	212 (174, 246)	181 (148, 209)	32 (26, 37)	425 (348, 492)
Tangshan	Hebei	North	Male	0 y～	0 (0, 0)	0 (0, 0)	0 (0, 0)	0 (0, 0)	0 (0, 0)	0 (0, 0)	0 (0, 0)	0 (0, 0)	0 (0, 0)	0 (0, 0)	0 (0, 0)	0 (0, 0)	0 (0, 1)	0 (0, 0)	0 (0, 0)	1 (1, 1)	0 (0, 0)	0 (0, 0)	0 (0, 0)	0 (0, 0)	0 (0, 0)	0 (0, 0)	0 (0, 0)	0 (0, 0)	0 (0, 1)	0 (0, 0)	0 (0, 0)	1 (1, 1)
Tangshan	Hebei	North	Male	1 y～	0 (0, 0)	0 (0, 0)	0 (0, 0)	0 (0, 0)	0 (0, 0)	0 (0, 0)	0 (0, 0)	0 (0, 0)	0 (0, 0)	0 (0, 0)	0 (0, 0)	0 (0, 0)	0 (0, 0)	0 (0, 0)	0 (0, 0)	1 (0, 1)	0 (0, 0)	0 (0, 0)	0 (0, 0)	0 (0, 0)	0 (0, 0)	0 (0, 0)	0 (0, 0)	0 (0, 0)	0 (0, 0)	0 (0, 0)	0 (0, 0)	1 (0, 1)
Tangshan	Hebei	North	Male	5 y～	0 (0, 0)	0 (0, 0)	0 (0, 0)	0 (0, 0)	0 (0, 0)	0 (0, 0)	0 (0, 0)	0 (0, 0)	0 (0, 0)	0 (0, 0)	0 (0, 0)	0 (0, 0)	0 (0, 0)	0 (0, 0)	0 (0, 0)	0 (0, 0)	0 (0, 0)	0 (0, 0)	0 (0, 0)	0 (0, 0)	0 (0, 0)	0 (0, 0)	0 (0, 0)	0 (0, 0)	0 (0, 0)	0 (0, 0)	0 (0, 0)	1 (1, 1)
Tangshan	Hebei	North	Male	10 y～	0 (0, 0)	0 (0, 0)	0 (0, 0)	0 (0, 0)	0 (0, 0)	0 (0, 0)	0 (0, 0)	0 (0, 0)	0 (0, 0)	0 (0, 0)	0 (0, 0)	0 (0, 0)	0 (0, 0)	0 (0, 0)	0 (0, 0)	0 (0, 0)	0 (0, 0)	0 (0, 0)	0 (0, 0)	0 (0, 0)	0 (0, 0)	0 (0, 0)	0 (0, 0)	1 (0, 1)	0 (0, 0)	0 (0, 0)	0 (0, 0)	1 (1, 1)
Tangshan	Hebei	North	Male	15 y～	0 (0, 0)	0 (0, 0)	0 (0, 0)	1 (1, 1)	0 (0, 0)	0 (0, 0)	0 (0, 0)	0 (0, 0)	0 (0, 0)	0 (0, 0)	0 (0, 0)	0 (0, 0)	0 (0, 0)	0 (0, 0)	0 (0, 0)	0 (0, 0)	0 (0, 0)	0 (0, 0)	0 (0, 0)	0 (0, 0)	1 (1, 1)	0 (0, 1)	0 (0, 0)	1 (1, 1)	1 (1, 1)	1 (1, 1)	0 (0, 0)	2 (2, 2)
Tangshan	Hebei	North	Male	20 y～	1 (1, 1)	0 (0, 1)	0 (0, 0)	1 (1, 1)	0 (0, 0)	0 (0, 0)	0 (0, 0)	0 (0, 0)	0 (0, 0)	0 (0, 0)	0 (0, 0)	0 (0, 0)	0 (0, 0)	0 (0, 0)	0 (0, 0)	0 (0, 1)	0 (0, 0)	0 (0, 0)	0 (0, 0)	0 (0, 0)	1 (0, 1)	0 (0, 0)	0 (0, 0)	1 (1, 1)	2 (1, 2)	1 (1, 1)	0 (0, 0)	3 (3, 3)
Tangshan	Hebei	North	Male	25 y～	1 (1, 1)	1 (1, 1)	0 (0, 0)	3 (2, 3)	0 (0, 0)	0 (0, 0)	0 (0, 0)	0 (0, 0)	0 (0, 0)	0 (0, 0)	0 (0, 0)	0 (0, 0)	0 (0, 0)	0 (0, 0)	0 (0, 0)	0 (0, 0)	0 (0, 0)	0 (0, 0)	0 (0, 0)	0 (0, 0)	1 (1, 1)	0 (0, 1)	0 (0, 0)	1 (1, 2)	2 (2, 2)	1 (1, 2)	1 (1, 1)	4 (4, 5)
Tangshan	Hebei	North	Male	30 y～	2 (2, 2)	1 (1, 1)	1 (0, 1)	4 (3, 4)	0 (0, 0)	0 (0, 0)	0 (0, 0)	0 (0, 0)	0 (0, 0)	0 (0, 0)	0 (0, 0)	0 (0, 0)	0 (0, 0)	0 (0, 0)	0 (0, 0)	0 (0, 0)	0 (0, 0)	0 (0, 0)	0 (0, 0)	0 (0, 0)	2 (2, 2)	1 (1, 1)	0 (0, 1)	3 (3, 4)	4 (3, 4)	3 (2, 3)	1 (1, 1)	8 (7, 8)
Tangshan	Hebei	North	Male	35 y～	6 (5, 6)	4 (3, 4)	2 (1, 2)	11 (9, 12)	0 (0, 0)	0 (0, 0)	0 (0, 0)	0 (0, 0)	0 (0, 1)	0 (0, 0)	0 (0, 0)	1 (1, 1)	0 (0, 0)	0 (0, 0)	0 (0, 0)	0 (0, 1)	0 (0, 0)	0 (0, 0)	0 (0, 0)	0 (0, 0)	4 (4, 4)	3 (2, 3)	1 (1, 1)	8 (7, 9)	10 (9, 11)	7 (6, 8)	3 (3, 3)	20 (18, 23)
Tangshan	Hebei	North	Male	40 y～	10 (9, 11)	7 (6, 8)	3 (3, 3)	20 (18, 22)	0 (0, 0)	0 (0, 0)	0 (0, 0)	0 (0, 0)	1 (1, 1)	1 (1, 1)	0 (0, 0)	2 (2, 3)	1 (0, 1)	0 (0, 0)	0 (0, 0)	1 (1, 1)	0 (0, 0)	0 (0, 0)	0 (0, 0)	0 (0, 1)	8 (7, 9)	6 (5, 6)	2 (2, 3)	17 (15, 18)	21 (18, 23)	14 (12, 16)	6 (5, 7)	41 (35, 45)
Tangshan	Hebei	North	Male	45 y～	16 (14, 17)	10 (9, 11)	5 (4, 5)	31 (27, 33)	0 (0, 0)	0 (0, 0)	0 (0, 0)	0 (0, 1)	3 (2, 3)	2 (1, 2)	1 (1, 1)	5 (4, 6)	1 (1, 1)	0 (0, 0)	0 (0, 0)	1 (1, 2)	1 (0, 1)	0 (0, 0)	0 (0, 0)	1 (1, 1)	15 (13, 16)	9 (8, 10)	5 (4, 5)	28 (25, 32)	35 (30, 38)	22 (19, 24)	11 (9, 12)	67 (57, 74)
Tangshan	Hebei	North	Male	50 y～	18 (15, 19)	11 (10, 12)	5 (5, 6)	34 (30, 37)	0 (0, 1)	0 (0, 0)	0 (0, 0)	1 (1, 1)	5 (4, 6)	3 (2, 3)	1 (1, 2)	9 (7, 11)	1 (1, 1)	1 (0, 1)	0 (0, 0)	2 (1, 2)	1 (1, 1)	0 (0, 0)	0 (0, 0)	1 (1, 1)	16 (14, 18)	10 (9, 12)	5 (4, 6)	31 (27, 35)	41 (35, 46)	25 (22, 29)	12 (11, 14)	79 (67, 88)
Tangshan	Hebei	North	Male	55 y～	36 (31, 40)	23 (20, 25)	11 (10, 12)	70 (60, 77)	1 (1, 1)	1 (1, 1)	0 (0, 0)	2 (2, 2)	15 (11, 18)	8 (6, 10)	4 (3, 5)	27 (21, 33)	2 (1, 2)	1 (1, 1)	1 (0, 1)	4 (3, 4)	1 (1, 2)	1 (1, 1)	0 (0, 0)	3 (2, 3)	32 (28, 36)	20 (18, 23)	10 (9, 11)	62 (54, 70)	87 (73, 98)	54 (46, 61)	26 (22, 30)	168 (141, 189)
Tangshan	Hebei	North	Male	60 y～	35 (30, 39)	23 (20, 26)	11 (9, 12)	70 (59, 76)	3 (2, 3)	1 (1, 2)	1 (1, 1)	5 (4, 6)	21 (16, 25)	11 (8, 13)	6 (4, 7)	37 (28, 45)	3 (2, 4)	1 (1, 2)	1 (1, 1)	5 (4, 7)	2 (1, 2)	1 (1, 1)	0 (0, 0)	3 (2, 3)	35 (30, 39)	23 (20, 26)	10 (9, 12)	68 (59, 77)	98 (82, 112)	61 (51, 69)	29 (24, 32)	188 (157, 214)
Tangshan	Hebei	North	Male	65 y～	35 (30, 38)	23 (20, 25)	10 (9, 11)	68 (58, 75)	4 (3, 5)	2 (2, 2)	1 (1, 1)	7 (6, 8)	22 (17, 27)	11 (9, 14)	6 (5, 7)	40 (30, 48)	3 (3, 4)	2 (1, 2)	1 (1, 1)	6 (4, 7)	2 (1, 2)	1 (1, 1)	0 (0, 1)	3 (2, 3)	34 (29, 38)	22 (19, 25)	10 (9, 11)	66 (57, 75)	100 (83, 114)	61 (51, 70)	29 (24, 33)	190 (158, 217)
Tangshan	Hebei	North	Male	70 y～	38 (31, 42)	25 (20, 28)	11 (9, 13)	74 (60, 83)	8 (7, 9)	4 (3, 5)	2 (2, 3)	14 (12, 16)	26 (20, 32)	13 (10, 16)	7 (5, 9)	47 (35, 57)	5 (4, 6)	2 (2, 3)	1 (1, 2)	8 (6, 10)	2 (2, 2)	1 (1, 1)	1 (0, 1)	4 (3, 4)	47 (40, 52)	31 (27, 35)	14 (12, 16)	92 (79, 103)	126 (103, 145)	77 (63, 88)	36 (30, 42)	238 (196, 274)
Tangshan	Hebei	North	Male	75 y～	40 (32, 45)	26 (21, 30)	12 (10, 13)	78 (63, 88)	11 (9, 13)	6 (5, 7)	3 (3, 4)	20 (17, 23)	22 (17, 27)	11 (8, 14)	6 (5, 7)	39 (30, 48)	7 (5, 9)	4 (3, 4)	2 (1, 2)	12 (10, 15)	2 (2, 3)	1 (1, 1)	1 (0, 1)	4 (3, 5)	48 (41, 54)	32 (27, 36)	14 (12, 16)	94 (81, 106)	130 (107, 150)	80 (66, 92)	38 (31, 43)	248 (204, 285)
Tangshan	Hebei	North	Male	80 y～	33 (27, 38)	23 (18, 26)	10 (8, 11)	66 (53, 75)	11 (9, 12)	7 (6, 9)	3 (3, 4)	21 (18, 25)	12 (9, 14)	8 (6, 10)	3 (3, 4)	23 (18, 28)	7 (6, 9)	5 (4, 6)	2 (2, 3)	14 (11, 18)	2 (1, 2)	1 (1, 1)	0 (0, 1)	3 (2, 3)	37 (31, 41)	25 (21, 28)	11 (9, 12)	72 (62, 81)	101 (83, 117)	69 (57, 80)	29 (24, 34)	200 (164, 230)
Tangshan	Hebei	North	Male	85 y～	39 (32, 45)	27 (22, 31)	11 (9, 13)	78 (63, 89)	16 (13, 18)	11 (9, 13)	5 (4, 5)	32 (27, 37)	8 (6, 10)	6 (4, 7)	2 (2, 3)	16 (12, 20)	15 (12, 19)	10 (8, 13)	4 (3, 6)	30 (23, 37)	2 (2, 2)	1 (1, 1)	1 (0, 1)	4 (3, 4)	33 (28, 37)	23 (19, 25)	10 (8, 11)	65 (55, 74)	114 (93, 132)	78 (64, 90)	33 (27, 38)	224 (184, 261)
Tangshan	Hebei	North	Female	0 y～	0 (0, 0)	0 (0, 0)	0 (0, 0)	0 (0, 0)	0 (0, 0)	0 (0, 0)	0 (0, 0)	0 (0, 0)	0 (0, 0)	0 (0, 0)	0 (0, 0)	0 (0, 0)	0 (0, 0)	0 (0, 0)	0 (0, 0)	0 (0, 0)	0 (0, 0)	0 (0, 0)	0 (0, 0)	0 (0, 0)	0 (0, 0)	0 (0, 0)	0 (0, 0)	0 (0, 0)	0 (0, 0)	0 (0, 0)	0 (0, 0)	0 (0, 0)
Tangshan	Hebei	North	Female	1 y～	0 (0, 0)	0 (0, 0)	0 (0, 0)	0 (0, 0)	0 (0, 0)	0 (0, 0)	0 (0, 0)	0 (0, 0)	0 (0, 0)	0 (0, 0)	0 (0, 0)	0 (0, 0)	0 (0, 0)	0 (0, 0)	0 (0, 0)	1 (0, 1)	0 (0, 0)	0 (0, 0)	0 (0, 0)	0 (0, 0)	0 (0, 0)	0 (0, 0)	0 (0, 0)	0 (0, 0)	0 (0, 0)	0 (0, 0)	0 (0, 0)	1 (0, 1)
Tangshan	Hebei	North	Female	5 y～	0 (0, 0)	0 (0, 0)	0 (0, 0)	0 (0, 0)	0 (0, 0)	0 (0, 0)	0 (0, 0)	0 (0, 0)	0 (0, 0)	0 (0, 0)	0 (0, 0)	0 (0, 0)	0 (0, 0)	0 (0, 0)	0 (0, 0)	0 (0, 0)	0 (0, 0)	0 (0, 0)	0 (0, 0)	0 (0, 0)	0 (0, 0)	0 (0, 0)	0 (0, 0)	0 (0, 0)	0 (0, 0)	0 (0, 0)	0 (0, 0)	0 (0, 0)
Tangshan	Hebei	North	Female	10 y～	0 (0, 0)	0 (0, 0)	0 (0, 0)	0 (0, 0)	0 (0, 0)	0 (0, 0)	0 (0, 0)	0 (0, 0)	0 (0, 0)	0 (0, 0)	0 (0, 0)	0 (0, 0)	0 (0, 0)	0 (0, 0)	0 (0, 0)	0 (0, 0)	0 (0, 0)	0 (0, 0)	0 (0, 0)	0 (0, 0)	0 (0, 0)	0 (0, 0)	0 (0, 0)	0 (0, 0)	0 (0, 0)	0 (0, 0)	0 (0, 0)	1 (1, 1)
Tangshan	Hebei	North	Female	15 y～	0 (0, 0)	0 (0, 0)	0 (0, 0)	0 (0, 0)	0 (0, 0)	0 (0, 0)	0 (0, 0)	0 (0, 0)	0 (0, 0)	0 (0, 0)	0 (0, 0)	0 (0, 0)	0 (0, 0)	0 (0, 0)	0 (0, 0)	0 (0, 0)	0 (0, 0)	0 (0, 0)	0 (0, 0)	0 (0, 0)	0 (0, 1)	0 (0, 0)	0 (0, 0)	1 (1, 1)	1 (1, 1)	1 (1, 1)	0 (0, 0)	1 (1, 2)
Tangshan	Hebei	North	Female	20 y～	0 (0, 0)	0 (0, 0)	0 (0, 0)	0 (0, 0)	0 (0, 0)	0 (0, 0)	0 (0, 0)	0 (0, 0)	0 (0, 0)	0 (0, 0)	0 (0, 0)	0 (0, 0)	0 (0, 0)	0 (0, 0)	0 (0, 0)	0 (0, 0)	0 (0, 0)	0 (0, 0)	0 (0, 0)	0 (0, 0)	0 (0, 0)	0 (0, 0)	0 (0, 0)	1 (1, 1)	1 (1, 1)	1 (1, 1)	0 (0, 0)	1 (1, 2)
Tangshan	Hebei	North	Female	25 y～	0 (0, 0)	0 (0, 0)	0 (0, 0)	1 (1, 1)	0 (0, 0)	0 (0, 0)	0 (0, 0)	0 (0, 0)	0 (0, 0)	0 (0, 0)	0 (0, 0)	0 (0, 0)	0 (0, 0)	0 (0, 0)	0 (0, 0)	0 (0, 0)	0 (0, 0)	0 (0, 0)	0 (0, 0)	0 (0, 0)	0 (0, 0)	0 (0, 0)	0 (0, 0)	1 (0, 1)	1 (1, 1)	1 (1, 1)	0 (0, 0)	2 (1, 2)
Tangshan	Hebei	North	Female	30 y～	1 (0, 1)	0 (0, 1)	0 (0, 0)	1 (1, 1)	0 (0, 0)	0 (0, 0)	0 (0, 0)	0 (0, 0)	0 (0, 0)	0 (0, 0)	0 (0, 0)	0 (0, 0)	0 (0, 0)	0 (0, 0)	0 (0, 0)	0 (0, 0)	0 (0, 0)	0 (0, 0)	0 (0, 0)	0 (0, 0)	0 (0, 0)	0 (0, 0)	0 (0, 0)	1 (1, 1)	1 (1, 1)	1 (1, 1)	0 (0, 0)	2 (2, 3)
Tangshan	Hebei	North	Female	35 y～	1 (1, 1)	1 (1, 1)	0 (0, 0)	2 (1, 2)	0 (0, 0)	0 (0, 0)	0 (0, 0)	0 (0, 0)	0 (0, 0)	0 (0, 0)	0 (0, 0)	1 (1, 1)	0 (0, 0)	0 (0, 0)	0 (0, 0)	0 (0, 0)	0 (0, 0)	0 (0, 0)	0 (0, 0)	0 (0, 0)	1 (1, 1)	1 (1, 1)	0 (0, 0)	2 (2, 2)	2 (2, 3)	2 (2, 2)	0 (0, 1)	5 (4, 5)
Tangshan	Hebei	North	Female	40 y～	2 (2, 2)	2 (2, 2)	0 (0, 0)	4 (4, 5)	0 (0, 0)	0 (0, 0)	0 (0, 0)	0 (0, 0)	1 (1, 1)	1 (1, 1)	0 (0, 0)	2 (2, 2)	0 (0, 0)	0 (0, 0)	0 (0, 0)	0 (0, 0)	0 (0, 0)	0 (0, 0)	0 (0, 0)	0 (0, 0)	2 (2, 2)	2 (2, 2)	0 (0, 0)	4 (4, 5)	5 (4, 6)	5 (4, 6)	1 (1, 1)	11 (10, 13)
Tangshan	Hebei	North	Female	45 y～	3 (3, 4)	3 (3, 3)	1 (1, 1)	7 (6, 8)	0 (0, 0)	0 (0, 0)	0 (0, 0)	0 (0, 0)	1 (1, 2)	2 (1, 2)	0 (0, 0)	3 (3, 4)	0 (0, 0)	0 (0, 1)	0 (0, 0)	1 (1, 1)	0 (0, 0)	0 (0, 0)	0 (0, 0)	0 (0, 0)	4 (3, 4)	3 (3, 4)	1 (1, 1)	8 (7, 9)	9 (8, 10)	9 (7, 10)	2 (1, 2)	19 (16, 22)
Tangshan	Hebei	North	Female	50 y～	4 (3, 4)	4 (3, 4)	1 (1, 1)	8 (7, 9)	0 (0, 0)	0 (0, 0)	0 (0, 0)	0 (0, 0)	2 (1, 2)	2 (2, 3)	0 (0, 0)	4 (3, 5)	0 (0, 0)	0 (0, 0)	0 (0, 0)	1 (0, 1)	0 (0, 0)	0 (0, 0)	0 (0, 0)	0 (0, 0)	5 (4, 5)	4 (4, 5)	1 (1, 1)	10 (9, 11)	11 (9, 12)	11 (9, 12)	2 (2, 2)	24 (20, 27)
Tangshan	Hebei	North	Female	55 y～	8 (7, 8)	7 (6, 8)	1 (1, 2)	16 (14, 18)	0 (0, 0)	0 (0, 0)	0 (0, 0)	1 (1, 1)	4 (3, 5)	5 (4, 6)	1 (1, 1)	10 (7, 12)	1 (0, 1)	1 (0, 1)	0 (0, 0)	1 (1, 2)	0 (0, 1)	1 (0, 1)	0 (0, 0)	1 (1, 1)	10 (8, 11)	9 (8, 10)	2 (2, 2)	20 (17, 23)	22 (19, 25)	22 (18, 25)	4 (4, 5)	49 (41, 55)
Tangshan	Hebei	North	Female	60 y～	11 (10, 13)	10 (9, 11)	2 (2, 2)	24 (20, 26)	1 (1, 1)	1 (1, 1)	0 (0, 0)	2 (1, 2)	5 (4, 6)	6 (4, 7)	1 (1, 1)	11 (9, 14)	1 (1, 1)	1 (1, 1)	0 (0, 0)	2 (2, 3)	1 (1, 1)	1 (1, 1)	0 (0, 0)	2 (1, 2)	12 (11, 14)	11 (10, 13)	2 (2, 3)	26 (22, 29)	31 (26, 35)	30 (25, 34)	6 (5, 7)	67 (56, 76)
Tangshan	Hebei	North	Female	65 y～	13 (11, 15)	12 (10, 13)	3 (2, 3)	28 (24, 31)	1 (1, 1)	1 (1, 2)	0 (0, 0)	3 (2, 3)	5 (4, 6)	6 (5, 8)	1 (1, 1)	12 (9, 15)	1 (1, 1)	1 (1, 1)	0 (0, 0)	2 (2, 3)	1 (1, 1)	1 (1, 1)	0 (0, 0)	2 (2, 2)	14 (12, 16)	13 (11, 15)	3 (2, 3)	30 (26, 34)	36 (30, 41)	35 (29, 40)	7 (6, 8)	78 (65, 88)
Tangshan	Hebei	North	Female	70 y～	21 (17, 24)	19 (16, 22)	4 (3, 5)	44 (36, 50)	2 (2, 3)	3 (2, 3)	0 (0, 1)	5 (5, 6)	6 (5, 8)	8 (6, 9)	1 (1, 2)	15 (12, 18)	2 (1, 2)	2 (2, 3)	0 (0, 0)	4 (3, 5)	1 (1, 1)	2 (1, 2)	0 (0, 0)	3 (3, 4)	24 (21, 27)	22 (19, 24)	5 (4, 5)	50 (43, 56)	57 (47, 65)	55 (45, 63)	11 (9, 13)	122 (101, 140)
Tangshan	Hebei	North	Female	75 y～	32 (26, 36)	29 (24, 33)	6 (5, 7)	67 (55, 76)	4 (3, 4)	5 (4, 5)	1 (1, 1)	9 (8, 11)	8 (6, 9)	9 (7, 11)	2 (1, 2)	18 (14, 22)	3 (2, 4)	3 (3, 4)	1 (0, 1)	7 (5, 8)	2 (1, 2)	2 (2, 2)	0 (0, 0)	4 (3, 5)	34 (29, 38)	31 (26, 34)	6 (5, 7)	71 (61, 79)	82 (68, 94)	79 (65, 90)	16 (13, 18)	176 (146, 202)
Tangshan	Hebei	North	Female	80 y～	36 (30, 42)	32 (26, 37)	7 (6, 8)	76 (62, 87)	6 (5, 8)	6 (5, 7)	2 (1, 2)	14 (12, 16)	7 (5, 9)	7 (5, 8)	2 (1, 2)	16 (12, 19)	5 (4, 6)	5 (4, 6)	1 (1, 1)	11 (8, 14)	2 (2, 2)	2 (1, 2)	0 (0, 1)	4 (3, 5)	34 (29, 39)	30 (26, 34)	7 (6, 8)	72 (61, 81)	92 (75, 106)	82 (67, 94)	19 (16, 22)	193 (158, 222)
Tangshan	Hebei	North	Female	85 y～	66 (54, 76)	59 (47, 67)	13 (11, 15)	138 (111, 159)	15 (12, 17)	14 (11, 16)	3 (3, 4)	32 (27, 37)	7 (5, 9)	7 (5, 8)	2 (1, 2)	15 (12, 19)	15 (11, 19)	14 (11, 17)	3 (3, 4)	32 (25, 40)	3 (2, 3)	3 (2, 3)	1 (1, 1)	7 (5, 8)	51 (43, 57)	45 (38, 50)	10 (9, 12)	105 (89, 119)	157 (128, 182)	140 (114, 162)	33 (27, 38)	329 (269, 382)
Xingtai	Hebei	North	Male	0 y～	0 (0, 0)	0 (0, 0)	0 (0, 0)	0 (0, 0)	0 (0, 0)	0 (0, 0)	0 (0, 0)	0 (0, 0)	0 (0, 0)	0 (0, 0)	0 (0, 0)	0 (0, 0)	0 (0, 0)	0 (0, 0)	0 (0, 0)	0 (0, 0)	0 (0, 0)	0 (0, 0)	0 (0, 0)	0 (0, 0)	0 (0, 0)	0 (0, 0)	0 (0, 0)	0 (0, 0)	0 (0, 0)	0 (0, 0)	0 (0, 0)	0 (0, 0)
Xingtai	Hebei	North	Male	1 y～	0 (0, 0)	0 (0, 0)	0 (0, 0)	0 (0, 0)	0 (0, 0)	0 (0, 0)	0 (0, 0)	0 (0, 0)	0 (0, 0)	0 (0, 0)	0 (0, 0)	0 (0, 0)	0 (0, 0)	0 (0, 0)	0 (0, 0)	0 (0, 0)	0 (0, 0)	0 (0, 0)	0 (0, 0)	0 (0, 0)	0 (0, 0)	0 (0, 0)	0 (0, 0)	0 (0, 0)	0 (0, 0)	0 (0, 0)	0 (0, 0)	0 (0, 0)
Xingtai	Hebei	North	Male	5 y～	0 (0, 0)	0 (0, 0)	0 (0, 0)	0 (0, 0)	0 (0, 0)	0 (0, 0)	0 (0, 0)	0 (0, 0)	0 (0, 0)	0 (0, 0)	0 (0, 0)	0 (0, 0)	0 (0, 0)	0 (0, 0)	0 (0, 0)	0 (0, 0)	0 (0, 0)	0 (0, 0)	0 (0, 0)	0 (0, 0)	0 (0, 0)	0 (0, 0)	0 (0, 0)	0 (0, 0)	0 (0, 0)	0 (0, 0)	0 (0, 0)	0 (0, 0)
Xingtai	Hebei	North	Male	10 y～	0 (0, 0)	0 (0, 0)	0 (0, 0)	0 (0, 0)	0 (0, 0)	0 (0, 0)	0 (0, 0)	0 (0, 0)	0 (0, 0)	0 (0, 0)	0 (0, 0)	0 (0, 0)	0 (0, 0)	0 (0, 0)	0 (0, 0)	0 (0, 0)	0 (0, 0)	0 (0, 0)	0 (0, 0)	0 (0, 0)	0 (0, 0)	0 (0, 0)	0 (0, 0)	0 (0, 0)	0 (0, 0)	0 (0, 0)	0 (0, 0)	0 (0, 0)
Xingtai	Hebei	North	Male	15 y～	0 (0, 0)	0 (0, 0)	0 (0, 0)	0 (0, 0)	0 (0, 0)	0 (0, 0)	0 (0, 0)	0 (0, 0)	0 (0, 0)	0 (0, 0)	0 (0, 0)	0 (0, 0)	0 (0, 0)	0 (0, 0)	0 (0, 0)	0 (0, 0)	0 (0, 0)	0 (0, 0)	0 (0, 0)	0 (0, 0)	0 (0, 0)	0 (0, 0)	0 (0, 0)	0 (0, 0)	0 (0, 0)	0 (0, 0)	0 (0, 0)	1 (1, 1)
Xingtai	Hebei	North	Male	20 y～	0 (0, 0)	0 (0, 0)	0 (0, 0)	0 (0, 0)	0 (0, 0)	0 (0, 0)	0 (0, 0)	0 (0, 0)	0 (0, 0)	0 (0, 0)	0 (0, 0)	0 (0, 0)	0 (0, 0)	0 (0, 0)	0 (0, 0)	0 (0, 0)	0 (0, 0)	0 (0, 0)	0 (0, 0)	0 (0, 0)	0 (0, 0)	0 (0, 0)	0 (0, 0)	0 (0, 0)	0 (0, 1)	0 (0, 0)	0 (0, 0)	1 (1, 1)
Xingtai	Hebei	North	Male	25 y～	0 (0, 0)	0 (0, 0)	0 (0, 0)	1 (1, 1)	0 (0, 0)	0 (0, 0)	0 (0, 0)	0 (0, 0)	0 (0, 0)	0 (0, 0)	0 (0, 0)	0 (0, 0)	0 (0, 0)	0 (0, 0)	0 (0, 0)	0 (0, 0)	0 (0, 0)	0 (0, 0)	0 (0, 0)	0 (0, 0)	0 (0, 0)	0 (0, 0)	0 (0, 0)	0 (0, 0)	1 (1, 1)	0 (0, 0)	0 (0, 0)	1 (1, 1)
Xingtai	Hebei	North	Male	30 y～	1 (0, 1)	0 (0, 0)	0 (0, 0)	1 (1, 1)	0 (0, 0)	0 (0, 0)	0 (0, 0)	0 (0, 0)	0 (0, 0)	0 (0, 0)	0 (0, 0)	0 (0, 0)	0 (0, 0)	0 (0, 0)	0 (0, 0)	0 (0, 0)	0 (0, 0)	0 (0, 0)	0 (0, 0)	0 (0, 0)	1 (0, 1)	0 (0, 0)	0 (0, 0)	1 (1, 1)	1 (1, 1)	1 (1, 1)	0 (0, 0)	2 (2, 2)
Xingtai	Hebei	North	Male	35 y～	2 (1, 2)	1 (1, 1)	0 (0, 0)	3 (3, 3)	0 (0, 0)	0 (0, 0)	0 (0, 0)	0 (0, 0)	0 (0, 0)	0 (0, 0)	0 (0, 0)	0 (0, 0)	0 (0, 0)	0 (0, 0)	0 (0, 0)	0 (0, 0)	0 (0, 0)	0 (0, 0)	0 (0, 0)	0 (0, 0)	1 (1, 1)	1 (1, 1)	0 (0, 0)	2 (2, 2)	3 (3, 4)	2 (2, 2)	1 (1, 1)	6 (5, 6)
Xingtai	Hebei	North	Male	40 y～	3 (3, 3)	2 (2, 2)	1 (1, 1)	6 (5, 6)	0 (0, 0)	0 (0, 0)	0 (0, 0)	0 (0, 0)	0 (0, 0)	0 (0, 0)	0 (0, 0)	1 (0, 1)	0 (0, 0)	0 (0, 0)	0 (0, 0)	0 (0, 0)	0 (0, 0)	0 (0, 0)	0 (0, 0)	0 (0, 0)	3 (2, 3)	1 (1, 2)	1 (1, 1)	5 (4, 5)	6 (6, 7)	4 (3, 4)	1 (1, 2)	12 (10, 13)
Xingtai	Hebei	North	Male	45 y～	5 (4, 5)	3 (2, 3)	1 (1, 1)	9 (8, 9)	0 (0, 0)	0 (0, 0)	0 (0, 0)	0 (0, 0)	1 (1, 1)	0 (0, 0)	0 (0, 0)	1 (1, 2)	0 (0, 0)	0 (0, 0)	0 (0, 0)	0 (0, 0)	0 (0, 0)	0 (0, 0)	0 (0, 0)	0 (0, 0)	4 (4, 5)	2 (2, 3)	1 (1, 1)	8 (7, 9)	11 (9, 12)	6 (5, 6)	3 (2, 3)	19 (16, 21)
Xingtai	Hebei	North	Male	50 y～	5 (5, 6)	3 (2, 3)	1 (1, 1)	10 (8, 10)	0 (0, 0)	0 (0, 0)	0 (0, 0)	0 (0, 0)	1 (1, 2)	1 (1, 1)	0 (0, 0)	3 (2, 3)	0 (0, 0)	0 (0, 0)	0 (0, 0)	0 (0, 1)	0 (0, 0)	0 (0, 0)	0 (0, 0)	0 (0, 0)	5 (4, 6)	3 (2, 3)	1 (1, 1)	9 (8, 10)	13 (11, 14)	6 (6, 7)	3 (3, 3)	22 (19, 25)
Xingtai	Hebei	North	Male	55 y～	11 (10, 12)	6 (5, 6)	3 (2, 3)	20 (17, 22)	0 (0, 0)	0 (0, 0)	0 (0, 0)	1 (1, 1)	5 (3, 6)	2 (2, 3)	1 (1, 1)	8 (6, 9)	1 (0, 1)	0 (0, 0)	0 (0, 0)	1 (1, 1)	0 (0, 1)	0 (0, 0)	0 (0, 0)	1 (1, 1)	10 (9, 11)	5 (4, 6)	2 (2, 3)	17 (15, 20)	27 (23, 30)	14 (12, 16)	7 (6, 7)	47 (40, 53)
Xingtai	Hebei	North	Male	60 y～	11 (9, 12)	6 (5, 7)	3 (2, 3)	20 (17, 21)	1 (1, 1)	0 (0, 0)	0 (0, 0)	1 (1, 2)	6 (5, 8)	3 (2, 3)	1 (1, 2)	10 (8, 13)	1 (1, 1)	0 (0, 0)	0 (0, 0)	2 (1, 2)	0 (0, 1)	0 (0, 0)	0 (0, 0)	1 (1, 1)	11 (9, 12)	6 (5, 7)	3 (2, 3)	19 (17, 22)	30 (25, 34)	16 (13, 18)	7 (6, 8)	53 (45, 60)
Xingtai	Hebei	North	Male	65 y～	11 (9, 12)	6 (5, 6)	3 (2, 3)	19 (17, 21)	1 (1, 1)	1 (0, 1)	0 (0, 0)	2 (2, 2)	7 (5, 8)	3 (2, 3)	2 (1, 2)	11 (8, 14)	1 (1, 1)	0 (0, 1)	0 (0, 0)	2 (1, 2)	0 (0, 1)	0 (0, 0)	0 (0, 0)	1 (1, 1)	10 (9, 12)	6 (5, 7)	3 (2, 3)	19 (16, 21)	31 (26, 35)	16 (13, 18)	7 (6, 8)	54 (45, 61)
Xingtai	Hebei	North	Male	70 y～	12 (10, 13)	6 (5, 7)	3 (2, 3)	21 (17, 23)	2 (2, 3)	1 (1, 1)	1 (0, 1)	4 (3, 5)	8 (6, 10)	3 (3, 4)	2 (1, 2)	13 (10, 16)	1 (1, 2)	1 (0, 1)	0 (0, 0)	2 (2, 3)	1 (0, 1)	0 (0, 0)	0 (0, 0)	1 (1, 1)	15 (13, 16)	8 (7, 9)	4 (3, 4)	26 (23, 29)	39 (32, 44)	20 (16, 23)	9 (8, 11)	68 (56, 78)
Xingtai	Hebei	North	Male	75 y～	12 (10, 14)	7 (6, 8)	3 (2, 3)	22 (18, 25)	4 (3, 4)	1 (1, 2)	1 (1, 1)	6 (5, 7)	7 (5, 8)	3 (2, 3)	2 (1, 2)	11 (8, 14)	2 (2, 3)	1 (1, 1)	0 (0, 1)	4 (3, 4)	1 (1, 1)	0 (0, 0)	0 (0, 0)	1 (1, 1)	15 (13, 17)	8 (7, 9)	4 (3, 4)	27 (23, 30)	40 (33, 46)	21 (17, 23)	10 (8, 11)	70 (58, 81)
Xingtai	Hebei	North	Male	80 y～	10 (8, 12)	6 (5, 7)	2 (2, 3)	18 (15, 21)	3 (3, 4)	2 (2, 2)	1 (1, 1)	6 (5, 7)	4 (3, 4)	2 (2, 3)	1 (1, 1)	7 (5, 8)	2 (2, 3)	1 (1, 2)	1 (0, 1)	4 (3, 5)	0 (0, 1)	0 (0, 0)	0 (0, 0)	1 (1, 1)	11 (10, 13)	6 (6, 7)	3 (2, 3)	20 (18, 23)	31 (26, 36)	18 (15, 21)	7 (6, 8)	56 (47, 65)
Xingtai	Hebei	North	Male	85 y～	12 (10, 14)	7 (6, 8)	3 (2, 3)	22 (18, 25)	5 (4, 6)	3 (3, 3)	1 (1, 1)	9 (8, 10)	3 (2, 3)	2 (1, 2)	1 (0, 1)	5 (3, 6)	5 (4, 6)	3 (2, 3)	1 (1, 1)	8 (7, 10)	1 (0, 1)	0 (0, 0)	0 (0, 0)	1 (1, 1)	10 (9, 12)	6 (5, 7)	2 (2, 3)	19 (16, 21)	35 (29, 40)	20 (17, 24)	8 (7, 9)	64 (52, 74)
Xingtai	Hebei	North	Female	0 y～	0 (0, 0)	0 (0, 0)	0 (0, 0)	0 (0, 0)	0 (0, 0)	0 (0, 0)	0 (0, 0)	0 (0, 0)	0 (0, 0)	0 (0, 0)	0 (0, 0)	0 (0, 0)	0 (0, 0)	0 (0, 0)	0 (0, 0)	0 (0, 0)	0 (0, 0)	0 (0, 0)	0 (0, 0)	0 (0, 0)	0 (0, 0)	0 (0, 0)	0 (0, 0)	0 (0, 0)	0 (0, 0)	0 (0, 0)	0 (0, 0)	0 (0, 0)
Xingtai	Hebei	North	Female	1 y～	0 (0, 0)	0 (0, 0)	0 (0, 0)	0 (0, 0)	0 (0, 0)	0 (0, 0)	0 (0, 0)	0 (0, 0)	0 (0, 0)	0 (0, 0)	0 (0, 0)	0 (0, 0)	0 (0, 0)	0 (0, 0)	0 (0, 0)	0 (0, 0)	0 (0, 0)	0 (0, 0)	0 (0, 0)	0 (0, 0)	0 (0, 0)	0 (0, 0)	0 (0, 0)	0 (0, 0)	0 (0, 0)	0 (0, 0)	0 (0, 0)	0 (0, 0)
Xingtai	Hebei	North	Female	5 y～	0 (0, 0)	0 (0, 0)	0 (0, 0)	0 (0, 0)	0 (0, 0)	0 (0, 0)	0 (0, 0)	0 (0, 0)	0 (0, 0)	0 (0, 0)	0 (0, 0)	0 (0, 0)	0 (0, 0)	0 (0, 0)	0 (0, 0)	0 (0, 0)	0 (0, 0)	0 (0, 0)	0 (0, 0)	0 (0, 0)	0 (0, 0)	0 (0, 0)	0 (0, 0)	0 (0, 0)	0 (0, 0)	0 (0, 0)	0 (0, 0)	0 (0, 0)
Xingtai	Hebei	North	Female	10 y～	0 (0, 0)	0 (0, 0)	0 (0, 0)	0 (0, 0)	0 (0, 0)	0 (0, 0)	0 (0, 0)	0 (0, 0)	0 (0, 0)	0 (0, 0)	0 (0, 0)	0 (0, 0)	0 (0, 0)	0 (0, 0)	0 (0, 0)	0 (0, 0)	0 (0, 0)	0 (0, 0)	0 (0, 0)	0 (0, 0)	0 (0, 0)	0 (0, 0)	0 (0, 0)	0 (0, 0)	0 (0, 0)	0 (0, 0)	0 (0, 0)	0 (0, 0)
Xingtai	Hebei	North	Female	15 y～	0 (0, 0)	0 (0, 0)	0 (0, 0)	0 (0, 0)	0 (0, 0)	0 (0, 0)	0 (0, 0)	0 (0, 0)	0 (0, 0)	0 (0, 0)	0 (0, 0)	0 (0, 0)	0 (0, 0)	0 (0, 0)	0 (0, 0)	0 (0, 0)	0 (0, 0)	0 (0, 0)	0 (0, 0)	0 (0, 0)	0 (0, 0)	0 (0, 0)	0 (0, 0)	0 (0, 0)	0 (0, 0)	0 (0, 0)	0 (0, 0)	0 (0, 0)
Xingtai	Hebei	North	Female	20 y～	0 (0, 0)	0 (0, 0)	0 (0, 0)	0 (0, 0)	0 (0, 0)	0 (0, 0)	0 (0, 0)	0 (0, 0)	0 (0, 0)	0 (0, 0)	0 (0, 0)	0 (0, 0)	0 (0, 0)	0 (0, 0)	0 (0, 0)	0 (0, 0)	0 (0, 0)	0 (0, 0)	0 (0, 0)	0 (0, 0)	0 (0, 0)	0 (0, 0)	0 (0, 0)	0 (0, 0)	0 (0, 0)	0 (0, 0)	0 (0, 0)	0 (0, 0)
Xingtai	Hebei	North	Female	25 y～	0 (0, 0)	0 (0, 0)	0 (0, 0)	0 (0, 0)	0 (0, 0)	0 (0, 0)	0 (0, 0)	0 (0, 0)	0 (0, 0)	0 (0, 0)	0 (0, 0)	0 (0, 0)	0 (0, 0)	0 (0, 0)	0 (0, 0)	0 (0, 0)	0 (0, 0)	0 (0, 0)	0 (0, 0)	0 (0, 0)	0 (0, 0)	0 (0, 0)	0 (0, 0)	0 (0, 0)	0 (0, 0)	0 (0, 0)	0 (0, 0)	0 (0, 0)
Xingtai	Hebei	North	Female	30 y～	0 (0, 0)	0 (0, 0)	0 (0, 0)	0 (0, 0)	0 (0, 0)	0 (0, 0)	0 (0, 0)	0 (0, 0)	0 (0, 0)	0 (0, 0)	0 (0, 0)	0 (0, 0)	0 (0, 0)	0 (0, 0)	0 (0, 0)	0 (0, 0)	0 (0, 0)	0 (0, 0)	0 (0, 0)	0 (0, 0)	0 (0, 0)	0 (0, 0)	0 (0, 0)	0 (0, 0)	0 (0, 0)	0 (0, 0)	0 (0, 0)	1 (1, 1)
Xingtai	Hebei	North	Female	35 y～	0 (0, 0)	0 (0, 0)	0 (0, 0)	0 (0, 1)	0 (0, 0)	0 (0, 0)	0 (0, 0)	0 (0, 0)	0 (0, 0)	0 (0, 0)	0 (0, 0)	0 (0, 0)	0 (0, 0)	0 (0, 0)	0 (0, 0)	0 (0, 0)	0 (0, 0)	0 (0, 0)	0 (0, 0)	0 (0, 0)	0 (0, 0)	0 (0, 0)	0 (0, 0)	1 (0, 1)	1 (1, 1)	1 (0, 1)	0 (0, 0)	1 (1, 2)
Xingtai	Hebei	North	Female	40 y～	1 (1, 1)	0 (0, 1)	0 (0, 0)	1 (1, 1)	0 (0, 0)	0 (0, 0)	0 (0, 0)	0 (0, 0)	0 (0, 0)	0 (0, 0)	0 (0, 0)	1 (0, 1)	0 (0, 0)	0 (0, 0)	0 (0, 0)	0 (0, 0)	0 (0, 0)	0 (0, 0)	0 (0, 0)	0 (0, 0)	1 (1, 1)	0 (0, 1)	0 (0, 0)	1 (1, 1)	2 (1, 2)	1 (1, 1)	0 (0, 0)	3 (3, 4)
Xingtai	Hebei	North	Female	45 y～	1 (1, 1)	1 (1, 1)	0 (0, 0)	2 (2, 2)	0 (0, 0)	0 (0, 0)	0 (0, 0)	0 (0, 0)	0 (0, 1)	0 (0, 1)	0 (0, 0)	1 (1, 1)	0 (0, 0)	0 (0, 0)	0 (0, 0)	0 (0, 0)	0 (0, 0)	0 (0, 0)	0 (0, 0)	0 (0, 0)	1 (1, 1)	1 (1, 1)	0 (0, 0)	2 (2, 2)	3 (2, 3)	2 (2, 3)	0 (0, 0)	5 (5, 6)
Xingtai	Hebei	North	Female	50 y～	1 (1, 1)	1 (1, 1)	0 (0, 0)	2 (2, 2)	0 (0, 0)	0 (0, 0)	0 (0, 0)	0 (0, 0)	1 (0, 1)	1 (0, 1)	0 (0, 0)	1 (1, 1)	0 (0, 0)	0 (0, 0)	0 (0, 0)	0 (0, 0)	0 (0, 0)	0 (0, 0)	0 (0, 0)	0 (0, 0)	1 (1, 2)	1 (1, 1)	0 (0, 0)	3 (2, 3)	3 (3, 4)	3 (2, 3)	1 (0, 1)	7 (6, 8)
Xingtai	Hebei	North	Female	55 y～	2 (2, 3)	2 (2, 2)	0 (0, 0)	5 (4, 5)	0 (0, 0)	0 (0, 0)	0 (0, 0)	0 (0, 0)	1 (1, 1)	1 (1, 2)	0 (0, 0)	3 (2, 3)	0 (0, 0)	0 (0, 0)	0 (0, 0)	0 (0, 0)	0 (0, 0)	0 (0, 0)	0 (0, 0)	0 (0, 0)	3 (3, 3)	2 (2, 3)	0 (0, 0)	6 (5, 6)	7 (6, 8)	6 (5, 7)	1 (1, 1)	14 (12, 16)
Xingtai	Hebei	North	Female	60 y～	4 (3, 4)	3 (2, 3)	1 (0, 1)	7 (6, 7)	0 (0, 0)	0 (0, 0)	0 (0, 0)	0 (0, 1)	2 (1, 2)	2 (1, 2)	0 (0, 0)	3 (2, 4)	0 (0, 0)	0 (0, 0)	0 (0, 0)	1 (1, 1)	0 (0, 0)	0 (0, 0)	0 (0, 0)	0 (0, 0)	4 (3, 4)	3 (3, 3)	1 (1, 1)	7 (6, 8)	10 (8, 11)	8 (6, 9)	1 (1, 2)	19 (16, 21)
Xingtai	Hebei	North	Female	65 y～	4 (4, 5)	3 (3, 3)	1 (1, 1)	8 (7, 9)	0 (0, 0)	0 (0, 0)	0 (0, 0)	1 (1, 1)	2 (1, 2)	2 (1, 2)	0 (0, 0)	4 (3, 4)	0 (0, 0)	0 (0, 0)	0 (0, 0)	1 (1, 1)	0 (0, 0)	0 (0, 0)	0 (0, 0)	1 (0, 1)	4 (4, 5)	3 (3, 4)	1 (1, 1)	9 (7, 10)	11 (9, 13)	9 (8, 10)	2 (1, 2)	22 (18, 25)
Xingtai	Hebei	North	Female	70 y～	7 (5, 7)	5 (4, 6)	1 (1, 1)	12 (10, 14)	1 (1, 1)	1 (1, 1)	0 (0, 0)	2 (1, 2)	2 (2, 2)	2 (2, 2)	0 (0, 0)	4 (3, 5)	1 (0, 1)	1 (0, 1)	0 (0, 0)	1 (1, 2)	0 (0, 0)	0 (0, 0)	0 (0, 0)	1 (1, 1)	7 (6, 8)	6 (5, 6)	1 (1, 1)	14 (12, 16)	18 (15, 20)	14 (12, 16)	3 (2, 3)	35 (29, 40)
Xingtai	Hebei	North	Female	75 y～	10 (8, 11)	7 (6, 8)	2 (1, 2)	19 (15, 21)	1 (1, 1)	1 (1, 1)	0 (0, 0)	3 (2, 3)	2 (2, 3)	2 (2, 3)	0 (0, 0)	5 (4, 6)	1 (1, 1)	1 (1, 1)	0 (0, 0)	2 (2, 2)	1 (0, 1)	1 (0, 1)	0 (0, 0)	1 (1, 1)	11 (9, 12)	8 (7, 9)	2 (1, 2)	20 (17, 22)	26 (21, 29)	20 (17, 23)	4 (3, 5)	50 (41, 57)
Xingtai	Hebei	North	Female	80 y～	11 (9, 13)	8 (7, 9)	2 (1, 2)	21 (17, 24)	2 (2, 2)	2 (1, 2)	0 (0, 0)	4 (3, 5)	2 (2, 3)	2 (1, 2)	0 (0, 1)	4 (3, 5)	2 (1, 2)	1 (1, 2)	0 (0, 0)	3 (2, 4)	1 (0, 1)	0 (0, 1)	0 (0, 0)	1 (1, 1)	11 (9, 12)	8 (7, 9)	2 (1, 2)	20 (17, 23)	29 (24, 33)	21 (17, 24)	5 (4, 6)	54 (45, 62)
Xingtai	Hebei	North	Female	85 y～	21 (17, 24)	15 (12, 17)	3 (3, 4)	39 (32, 45)	5 (4, 5)	4 (3, 4)	1 (1, 1)	9 (8, 11)	2 (2, 3)	2 (1, 2)	0 (0, 1)	4 (3, 5)	5 (4, 6)	4 (3, 4)	1 (1, 1)	9 (7, 11)	1 (1, 1)	1 (1, 1)	0 (0, 0)	2 (1, 2)	16 (13, 18)	12 (10, 13)	3 (2, 3)	30 (25, 34)	49 (40, 57)	36 (30, 42)	8 (7, 10)	93 (77, 108)
Zhangjiakou	Hebei	North	Male	0 y～	0 (0, 0)	0 (0, 0)	0 (0, 0)	0 (0, 0)	0 (0, 0)	0 (0, 0)	0 (0, 0)	0 (0, 0)	0 (0, 0)	0 (0, 0)	0 (0, 0)	0 (0, 0)	0 (0, 0)	0 (0, 0)	0 (0, 0)	0 (0, 0)	0 (0, 0)	0 (0, 0)	0 (0, 0)	0 (0, 0)	0 (0, 0)	0 (0, 0)	0 (0, 0)	0 (0, 0)	0 (0, 0)	0 (0, 0)	0 (0, 0)	0 (0, 0)
Zhangjiakou	Hebei	North	Male	1 y～	0 (0, 0)	0 (0, 0)	0 (0, 0)	0 (0, 0)	0 (0, 0)	0 (0, 0)	0 (0, 0)	0 (0, 0)	0 (0, 0)	0 (0, 0)	0 (0, 0)	0 (0, 0)	0 (0, 0)	0 (0, 0)	0 (0, 0)	0 (0, 0)	0 (0, 0)	0 (0, 0)	0 (0, 0)	0 (0, 0)	0 (0, 0)	0 (0, 0)	0 (0, 0)	0 (0, 0)	0 (0, 0)	0 (0, 0)	0 (0, 0)	0 (0, 0)
Zhangjiakou	Hebei	North	Male	5 y～	0 (0, 0)	0 (0, 0)	0 (0, 0)	0 (0, 0)	0 (0, 0)	0 (0, 0)	0 (0, 0)	0 (0, 0)	0 (0, 0)	0 (0, 0)	0 (0, 0)	0 (0, 0)	0 (0, 0)	0 (0, 0)	0 (0, 0)	0 (0, 0)	0 (0, 0)	0 (0, 0)	0 (0, 0)	0 (0, 0)	0 (0, 0)	0 (0, 0)	0 (0, 0)	0 (0, 0)	0 (0, 0)	0 (0, 0)	0 (0, 0)	0 (0, 0)
Zhangjiakou	Hebei	North	Male	10 y～	0 (0, 0)	0 (0, 0)	0 (0, 0)	0 (0, 0)	0 (0, 0)	0 (0, 0)	0 (0, 0)	0 (0, 0)	0 (0, 0)	0 (0, 0)	0 (0, 0)	0 (0, 0)	0 (0, 0)	0 (0, 0)	0 (0, 0)	0 (0, 0)	0 (0, 0)	0 (0, 0)	0 (0, 0)	0 (0, 0)	0 (0, 0)	0 (0, 0)	0 (0, 0)	0 (0, 0)	0 (0, 0)	0 (0, 0)	0 (0, 0)	0 (0, 0)
Zhangjiakou	Hebei	North	Male	15 y～	0 (0, 0)	0 (0, 0)	0 (0, 0)	0 (0, 0)	0 (0, 0)	0 (0, 0)	0 (0, 0)	0 (0, 0)	0 (0, 0)	0 (0, 0)	0 (0, 0)	0 (0, 0)	0 (0, 0)	0 (0, 0)	0 (0, 0)	0 (0, 0)	0 (0, 0)	0 (0, 0)	0 (0, 0)	0 (0, 0)	0 (0, 0)	0 (0, 0)	0 (0, 0)	1 (0, 1)	0 (0, 0)	0 (0, 1)	0 (0, 0)	1 (1, 1)
Zhangjiakou	Hebei	North	Male	20 y～	0 (0, 0)	0 (0, 0)	0 (0, 0)	1 (0, 1)	0 (0, 0)	0 (0, 0)	0 (0, 0)	0 (0, 0)	0 (0, 0)	0 (0, 0)	0 (0, 0)	0 (0, 0)	0 (0, 0)	0 (0, 0)	0 (0, 0)	0 (0, 0)	0 (0, 0)	0 (0, 0)	0 (0, 0)	0 (0, 0)	0 (0, 0)	0 (0, 0)	0 (0, 0)	0 (0, 1)	0 (0, 0)	1 (1, 1)	0 (0, 0)	1 (1, 1)
Zhangjiakou	Hebei	North	Male	25 y～	0 (0, 0)	1 (0, 1)	0 (0, 0)	1 (1, 1)	0 (0, 0)	0 (0, 0)	0 (0, 0)	0 (0, 0)	0 (0, 0)	0 (0, 0)	0 (0, 0)	0 (0, 0)	0 (0, 0)	0 (0, 0)	0 (0, 0)	0 (0, 0)	0 (0, 0)	0 (0, 0)	0 (0, 0)	0 (0, 0)	0 (0, 0)	0 (0, 0)	0 (0, 0)	1 (1, 1)	1 (1, 1)	1 (1, 1)	0 (0, 0)	2 (1, 2)
Zhangjiakou	Hebei	North	Male	30 y～	1 (0, 1)	1 (1, 1)	0 (0, 0)	1 (1, 2)	0 (0, 0)	0 (0, 0)	0 (0, 0)	0 (0, 0)	0 (0, 0)	0 (0, 0)	0 (0, 0)	0 (0, 0)	0 (0, 0)	0 (0, 0)	0 (0, 0)	0 (0, 0)	0 (0, 0)	0 (0, 0)	0 (0, 0)	0 (0, 0)	0 (0, 1)	1 (1, 1)	0 (0, 0)	1 (1, 2)	1 (1, 1)	2 (1, 2)	0 (0, 1)	3 (3, 4)
Zhangjiakou	Hebei	North	Male	35 y～	2 (1, 2)	2 (2, 3)	1 (1, 1)	4 (4, 5)	0 (0, 0)	0 (0, 0)	0 (0, 0)	0 (0, 0)	0 (0, 0)	0 (0, 0)	0 (0, 0)	0 (0, 0)	0 (0, 0)	0 (0, 0)	0 (0, 0)	0 (0, 0)	0 (0, 0)	0 (0, 0)	0 (0, 0)	0 (0, 0)	1 (1, 1)	2 (1, 2)	0 (0, 1)	3 (3, 4)	3 (2, 3)	4 (3, 5)	1 (1, 1)	8 (7, 9)
Zhangjiakou	Hebei	North	Male	40 y～	3 (2, 3)	4 (3, 5)	1 (1, 1)	8 (7, 9)	0 (0, 0)	0 (0, 0)	0 (0, 0)	0 (0, 0)	0 (0, 0)	0 (0, 0)	0 (0, 0)	1 (1, 1)	0 (0, 0)	0 (0, 0)	0 (0, 0)	0 (0, 0)	0 (0, 0)	0 (0, 0)	0 (0, 0)	0 (0, 0)	2 (2, 3)	3 (3, 4)	1 (1, 1)	7 (6, 8)	6 (5, 6)	8 (7, 9)	3 (2, 3)	16 (14, 19)
Zhangjiakou	Hebei	North	Male	45 y～	4 (4, 5)	6 (5, 7)	2 (2, 2)	12 (10, 14)	0 (0, 0)	0 (0, 0)	0 (0, 0)	0 (0, 0)	1 (1, 1)	1 (1, 1)	0 (0, 0)	2 (1, 2)	0 (0, 0)	0 (0, 0)	0 (0, 0)	0 (0, 1)	0 (0, 0)	0 (0, 0)	0 (0, 0)	0 (0, 0)	4 (3, 5)	6 (5, 6)	2 (2, 2)	11 (10, 13)	9 (8, 11)	13 (11, 15)	5 (4, 5)	27 (23, 31)
Zhangjiakou	Hebei	North	Male	50 y～	5 (4, 5)	7 (6, 8)	2 (2, 3)	14 (11, 16)	0 (0, 0)	0 (0, 0)	0 (0, 0)	0 (0, 0)	1 (1, 2)	2 (1, 2)	1 (0, 1)	4 (3, 4)	0 (0, 0)	0 (0, 0)	0 (0, 0)	1 (0, 1)	0 (0, 0)	0 (0, 0)	0 (0, 0)	1 (0, 1)	4 (4, 5)	6 (5, 7)	2 (2, 2)	13 (11, 14)	11 (9, 13)	15 (13, 17)	5 (4, 6)	32 (26, 36)
Zhangjiakou	Hebei	North	Male	55 y～	10 (8, 11)	14 (11, 15)	5 (4, 5)	28 (23, 32)	0 (0, 0)	0 (0, 0)	0 (0, 0)	1 (1, 1)	4 (3, 5)	5 (4, 6)	2 (1, 2)	11 (8, 13)	1 (0, 1)	1 (0, 1)	0 (0, 0)	1 (1, 2)	0 (0, 1)	1 (0, 1)	0 (0, 0)	1 (1, 1)	9 (7, 10)	12 (10, 14)	4 (4, 5)	25 (21, 28)	24 (19, 27)	32 (26, 37)	11 (9, 13)	67 (55, 78)
Zhangjiakou	Hebei	North	Male	60 y～	9 (8, 11)	14 (11, 15)	4 (4, 5)	27 (22, 31)	1 (1, 1)	1 (1, 1)	0 (0, 0)	2 (1, 2)	6 (4, 7)	7 (5, 8)	2 (2, 3)	14 (11, 18)	1 (1, 1)	1 (1, 1)	0 (0, 0)	2 (1, 3)	0 (0, 1)	1 (0, 1)	0 (0, 0)	1 (1, 1)	9 (8, 11)	13 (11, 15)	4 (4, 5)	27 (23, 31)	26 (21, 31)	36 (29, 42)	12 (9, 14)	74 (60, 86)
Zhangjiakou	Hebei	North	Male	65 y～	9 (8, 10)	13 (11, 15)	4 (4, 5)	27 (22, 31)	1 (1, 1)	1 (1, 1)	0 (0, 0)	3 (2, 3)	6 (5, 7)	7 (5, 9)	2 (2, 3)	16 (12, 19)	1 (1, 1)	1 (1, 1)	0 (0, 0)	2 (2, 3)	0 (0, 1)	1 (0, 1)	0 (0, 0)	1 (1, 1)	9 (8, 10)	13 (11, 15)	4 (4, 5)	26 (22, 30)	27 (21, 31)	36 (29, 42)	12 (10, 14)	74 (60, 87)
Zhangjiakou	Hebei	North	Male	70 y～	10 (8, 12)	14 (11, 17)	5 (4, 5)	29 (23, 34)	2 (2, 2)	2 (2, 3)	1 (1, 1)	5 (4, 6)	7 (5, 9)	8 (6, 10)	3 (2, 3)	18 (14, 23)	1 (1, 2)	1 (1, 2)	0 (0, 1)	3 (2, 4)	1 (0, 1)	1 (1, 1)	0 (0, 0)	2 (1, 2)	12 (10, 14)	18 (15, 20)	6 (5, 6)	36 (30, 40)	33 (27, 39)	45 (36, 53)	15 (12, 17)	93 (75, 109)
Zhangjiakou	Hebei	North	Male	75 y～	10 (8, 12)	15 (12, 18)	5 (4, 6)	30 (24, 36)	3 (2, 3)	3 (3, 4)	1 (1, 1)	7 (6, 9)	6 (5, 7)	7 (5, 9)	2 (2, 3)	15 (12, 19)	2 (1, 2)	2 (2, 3)	1 (0, 1)	5 (3, 6)	1 (1, 1)	1 (1, 1)	0 (0, 0)	2 (1, 2)	12 (11, 14)	18 (15, 20)	6 (5, 7)	36 (31, 41)	34 (27, 40)	46 (37, 55)	15 (12, 18)	96 (77, 113)
Zhangjiakou	Hebei	North	Male	80 y～	9 (7, 10)	13 (10, 15)	4 (3, 5)	26 (21, 31)	3 (2, 3)	4 (3, 5)	1 (1, 1)	8 (7, 10)	3 (2, 4)	5 (4, 6)	1 (1, 2)	9 (7, 11)	2 (1, 2)	3 (2, 4)	1 (1, 1)	5 (4, 7)	0 (0, 1)	1 (1, 1)	0 (0, 0)	1 (1, 1)	10 (8, 11)	14 (12, 16)	4 (4, 5)	28 (24, 32)	27 (22, 31)	40 (32, 47)	12 (10, 14)	78 (63, 92)
Zhangjiakou	Hebei	North	Male	85 y～	10 (8, 12)	15 (12, 18)	5 (4, 6)	31 (24, 36)	4 (3, 5)	6 (5, 7)	2 (1, 2)	12 (10, 14)	2 (2, 3)	3 (3, 4)	1 (1, 1)	7 (5, 8)	4 (3, 5)	6 (4, 8)	2 (1, 2)	11 (8, 15)	1 (0, 1)	1 (1, 1)	0 (0, 0)	2 (1, 2)	9 (7, 10)	13 (11, 14)	4 (3, 4)	25 (21, 29)	30 (24, 35)	44 (35, 53)	13 (11, 16)	87 (70, 104)
Zhangjiakou	Hebei	North	Female	0 y～	0 (0, 0)	0 (0, 0)	0 (0, 0)	0 (0, 0)	0 (0, 0)	0 (0, 0)	0 (0, 0)	0 (0, 0)	0 (0, 0)	0 (0, 0)	0 (0, 0)	0 (0, 0)	0 (0, 0)	0 (0, 0)	0 (0, 0)	0 (0, 0)	0 (0, 0)	0 (0, 0)	0 (0, 0)	0 (0, 0)	0 (0, 0)	0 (0, 0)	0 (0, 0)	0 (0, 0)	0 (0, 0)	0 (0, 0)	0 (0, 0)	0 (0, 0)
Zhangjiakou	Hebei	North	Female	1 y～	0 (0, 0)	0 (0, 0)	0 (0, 0)	0 (0, 0)	0 (0, 0)	0 (0, 0)	0 (0, 0)	0 (0, 0)	0 (0, 0)	0 (0, 0)	0 (0, 0)	0 (0, 0)	0 (0, 0)	0 (0, 0)	0 (0, 0)	0 (0, 0)	0 (0, 0)	0 (0, 0)	0 (0, 0)	0 (0, 0)	0 (0, 0)	0 (0, 0)	0 (0, 0)	0 (0, 0)	0 (0, 0)	0 (0, 0)	0 (0, 0)	0 (0, 0)
Zhangjiakou	Hebei	North	Female	5 y～	0 (0, 0)	0 (0, 0)	0 (0, 0)	0 (0, 0)	0 (0, 0)	0 (0, 0)	0 (0, 0)	0 (0, 0)	0 (0, 0)	0 (0, 0)	0 (0, 0)	0 (0, 0)	0 (0, 0)	0 (0, 0)	0 (0, 0)	0 (0, 0)	0 (0, 0)	0 (0, 0)	0 (0, 0)	0 (0, 0)	0 (0, 0)	0 (0, 0)	0 (0, 0)	0 (0, 0)	0 (0, 0)	0 (0, 0)	0 (0, 0)	0 (0, 0)
Zhangjiakou	Hebei	North	Female	10 y～	0 (0, 0)	0 (0, 0)	0 (0, 0)	0 (0, 0)	0 (0, 0)	0 (0, 0)	0 (0, 0)	0 (0, 0)	0 (0, 0)	0 (0, 0)	0 (0, 0)	0 (0, 0)	0 (0, 0)	0 (0, 0)	0 (0, 0)	0 (0, 0)	0 (0, 0)	0 (0, 0)	0 (0, 0)	0 (0, 0)	0 (0, 0)	0 (0, 0)	0 (0, 0)	0 (0, 0)	0 (0, 0)	0 (0, 0)	0 (0, 0)	0 (0, 0)
Zhangjiakou	Hebei	North	Female	15 y～	0 (0, 0)	0 (0, 0)	0 (0, 0)	0 (0, 0)	0 (0, 0)	0 (0, 0)	0 (0, 0)	0 (0, 0)	0 (0, 0)	0 (0, 0)	0 (0, 0)	0 (0, 0)	0 (0, 0)	0 (0, 0)	0 (0, 0)	0 (0, 0)	0 (0, 0)	0 (0, 0)	0 (0, 0)	0 (0, 0)	0 (0, 0)	0 (0, 0)	0 (0, 0)	0 (0, 0)	0 (0, 0)	0 (0, 0)	0 (0, 0)	1 (1, 1)
Zhangjiakou	Hebei	North	Female	20 y～	0 (0, 0)	0 (0, 0)	0 (0, 0)	0 (0, 0)	0 (0, 0)	0 (0, 0)	0 (0, 0)	0 (0, 0)	0 (0, 0)	0 (0, 0)	0 (0, 0)	0 (0, 0)	0 (0, 0)	0 (0, 0)	0 (0, 0)	0 (0, 0)	0 (0, 0)	0 (0, 0)	0 (0, 0)	0 (0, 0)	0 (0, 0)	0 (0, 0)	0 (0, 0)	0 (0, 0)	0 (0, 0)	0 (0, 0)	0 (0, 0)	1 (0, 1)
Zhangjiakou	Hebei	North	Female	25 y～	0 (0, 0)	0 (0, 0)	0 (0, 0)	0 (0, 0)	0 (0, 0)	0 (0, 0)	0 (0, 0)	0 (0, 0)	0 (0, 0)	0 (0, 0)	0 (0, 0)	0 (0, 0)	0 (0, 0)	0 (0, 0)	0 (0, 0)	0 (0, 0)	0 (0, 0)	0 (0, 0)	0 (0, 0)	0 (0, 0)	0 (0, 0)	0 (0, 0)	0 (0, 0)	0 (0, 0)	0 (0, 0)	0 (0, 0)	0 (0, 0)	1 (1, 1)
Zhangjiakou	Hebei	North	Female	30 y～	0 (0, 0)	0 (0, 0)	0 (0, 0)	0 (0, 1)	0 (0, 0)	0 (0, 0)	0 (0, 0)	0 (0, 0)	0 (0, 0)	0 (0, 0)	0 (0, 0)	0 (0, 0)	0 (0, 0)	0 (0, 0)	0 (0, 0)	0 (0, 0)	0 (0, 0)	0 (0, 0)	0 (0, 0)	0 (0, 0)	0 (0, 0)	0 (0, 0)	0 (0, 0)	0 (0, 0)	0 (0, 0)	1 (1, 1)	0 (0, 0)	1 (1, 1)
Zhangjiakou	Hebei	North	Female	35 y～	0 (0, 0)	0 (0, 0)	0 (0, 0)	1 (1, 1)	0 (0, 0)	0 (0, 0)	0 (0, 0)	0 (0, 0)	0 (0, 0)	0 (0, 0)	0 (0, 0)	0 (0, 0)	0 (0, 0)	0 (0, 0)	0 (0, 0)	0 (0, 0)	0 (0, 0)	0 (0, 0)	0 (0, 0)	0 (0, 0)	0 (0, 0)	0 (0, 1)	0 (0, 0)	1 (1, 1)	1 (1, 1)	1 (1, 1)	0 (0, 0)	2 (2, 2)
Zhangjiakou	Hebei	North	Female	40 y～	1 (0, 1)	1 (1, 1)	0 (0, 0)	2 (2, 2)	0 (0, 0)	0 (0, 0)	0 (0, 0)	0 (0, 0)	0 (0, 0)	0 (0, 1)	0 (0, 0)	1 (1, 1)	0 (0, 0)	0 (0, 0)	0 (0, 0)	0 (0, 0)	0 (0, 0)	0 (0, 0)	0 (0, 0)	0 (0, 0)	1 (0, 1)	1 (1, 1)	0 (0, 0)	2 (2, 2)	1 (1, 2)	3 (2, 3)	0 (0, 1)	5 (4, 5)
Zhangjiakou	Hebei	North	Female	45 y～	1 (1, 1)	2 (1, 2)	0 (0, 0)	3 (2, 3)	0 (0, 0)	0 (0, 0)	0 (0, 0)	0 (0, 0)	0 (0, 0)	1 (1, 1)	0 (0, 0)	1 (1, 2)	0 (0, 0)	0 (0, 0)	0 (0, 0)	0 (0, 0)	0 (0, 0)	0 (0, 0)	0 (0, 0)	0 (0, 0)	1 (1, 1)	2 (2, 2)	0 (0, 0)	3 (3, 4)	2 (2, 3)	5 (4, 6)	1 (1, 1)	8 (7, 9)
Zhangjiakou	Hebei	North	Female	50 y～	1 (1, 1)	2 (2, 2)	0 (0, 0)	3 (3, 4)	0 (0, 0)	0 (0, 0)	0 (0, 0)	0 (0, 0)	0 (0, 1)	1 (1, 1)	0 (0, 0)	2 (1, 2)	0 (0, 0)	0 (0, 0)	0 (0, 0)	0 (0, 0)	0 (0, 0)	0 (0, 0)	0 (0, 0)	0 (0, 0)	1 (1, 2)	2 (2, 3)	0 (0, 0)	4 (4, 5)	3 (3, 3)	6 (5, 7)	1 (1, 1)	10 (8, 11)
Zhangjiakou	Hebei	North	Female	55 y～	2 (2, 2)	4 (3, 4)	1 (1, 1)	7 (6, 7)	0 (0, 0)	0 (0, 0)	0 (0, 0)	0 (0, 0)	1 (1, 1)	3 (2, 3)	0 (0, 0)	4 (3, 5)	0 (0, 0)	0 (0, 0)	0 (0, 0)	0 (0, 1)	0 (0, 0)	0 (0, 0)	0 (0, 0)	1 (0, 1)	3 (2, 3)	5 (4, 6)	1 (1, 1)	8 (7, 9)	6 (5, 7)	12 (10, 14)	2 (2, 2)	20 (17, 23)
Zhangjiakou	Hebei	North	Female	60 y～	3 (3, 4)	6 (5, 6)	1 (1, 1)	10 (8, 11)	0 (0, 0)	0 (0, 0)	0 (0, 0)	1 (1, 1)	1 (1, 2)	3 (2, 4)	0 (0, 1)	5 (4, 6)	0 (0, 0)	1 (0, 1)	0 (0, 0)	1 (1, 1)	0 (0, 0)	0 (0, 0)	0 (0, 0)	1 (1, 1)	3 (3, 4)	6 (5, 7)	1 (1, 1)	11 (9, 12)	8 (7, 10)	16 (13, 19)	3 (2, 3)	27 (22, 32)
Zhangjiakou	Hebei	North	Female	65 y～	4 (3, 4)	7 (6, 8)	1 (1, 1)	11 (9, 13)	0 (0, 0)	1 (1, 1)	0 (0, 0)	1 (1, 1)	1 (1, 2)	3 (2, 4)	0 (0, 1)	5 (4, 6)	0 (0, 0)	1 (0, 1)	0 (0, 0)	1 (1, 1)	0 (0, 0)	1 (0, 1)	0 (0, 0)	1 (1, 1)	4 (3, 5)	7 (6, 8)	1 (1, 1)	12 (10, 14)	10 (8, 11)	19 (15, 22)	3 (3, 4)	32 (26, 37)
Zhangjiakou	Hebei	North	Female	70 y～	6 (5, 7)	11 (8, 12)	2 (1, 2)	18 (14, 21)	1 (0, 1)	1 (1, 2)	0 (0, 0)	2 (2, 3)	2 (1, 2)	4 (3, 5)	1 (0, 1)	6 (5, 8)	0 (0, 1)	1 (1, 1)	0 (0, 0)	2 (1, 2)	0 (0, 0)	1 (1, 1)	0 (0, 0)	1 (1, 2)	7 (6, 7)	12 (10, 13)	2 (2, 2)	20 (17, 23)	15 (13, 18)	30 (24, 34)	5 (4, 6)	50 (41, 58)
Zhangjiakou	Hebei	North	Female	75 y～	9 (7, 10)	16 (13, 19)	3 (2, 3)	27 (22, 32)	1 (1, 1)	2 (2, 3)	0 (0, 0)	4 (3, 4)	2 (2, 2)	5 (4, 6)	1 (1, 1)	8 (6, 9)	1 (1, 1)	2 (1, 2)	0 (0, 0)	3 (2, 3)	1 (0, 1)	1 (1, 1)	0 (0, 0)	2 (1, 2)	9 (8, 10)	17 (14, 19)	3 (2, 3)	28 (24, 32)	22 (18, 26)	42 (34, 49)	7 (6, 8)	71 (58, 83)
Zhangjiakou	Hebei	North	Female	80 y～	9 (7, 11)	17 (13, 20)	3 (2, 4)	29 (23, 35)	2 (1, 2)	3 (2, 4)	1 (0, 1)	5 (4, 6)	2 (1, 2)	4 (3, 4)	1 (1, 1)	6 (5, 8)	1 (1, 2)	2 (2, 3)	0 (0, 1)	4 (3, 5)	1 (0, 1)	1 (1, 1)	0 (0, 0)	2 (1, 2)	9 (7, 10)	16 (13, 18)	3 (2, 3)	27 (23, 31)	24 (19, 28)	42 (34, 50)	8 (6, 9)	74 (59, 87)
Zhangjiakou	Hebei	North	Female	85 y～	17 (14, 20)	31 (24, 36)	6 (4, 7)	53 (42, 63)	4 (3, 4)	7 (6, 8)	1 (1, 2)	12 (10, 14)	2 (1, 2)	3 (3, 4)	1 (1, 1)	6 (4, 7)	4 (3, 5)	7 (5, 9)	1 (1, 2)	12 (9, 16)	1 (1, 1)	2 (1, 2)	0 (0, 0)	3 (2, 3)	13 (11, 15)	23 (19, 26)	4 (3, 5)	40 (33, 46)	40 (32, 48)	72 (58, 86)	13 (11, 16)	126 (100, 149)
Datong	Shanxi	North	Male	0 y～	0 (0, 0)	0 (0, 0)	0 (0, 0)	0 (0, 0)	0 (0, 0)	0 (0, 0)	0 (0, 0)	0 (0, 0)	0 (0, 0)	0 (0, 0)	0 (0, 0)	0 (0, 0)	0 (0, 0)	0 (0, 0)	0 (0, 0)	1 (0, 1)	0 (0, 0)	0 (0, 0)	0 (0, 0)	0 (0, 0)	0 (0, 0)	0 (0, 0)	0 (0, 0)	0 (0, 0)	0 (0, 0)	0 (0, 0)	0 (0, 0)	1 (0, 1)
Datong	Shanxi	North	Male	1 y～	0 (0, 0)	0 (0, 0)	0 (0, 0)	0 (0, 0)	0 (0, 0)	0 (0, 0)	0 (0, 0)	0 (0, 0)	0 (0, 0)	0 (0, 0)	0 (0, 0)	0 (0, 0)	0 (0, 0)	0 (0, 0)	0 (0, 0)	1 (0, 1)	0 (0, 0)	0 (0, 0)	0 (0, 0)	0 (0, 0)	0 (0, 0)	0 (0, 0)	0 (0, 0)	0 (0, 0)	0 (0, 0)	0 (0, 0)	0 (0, 0)	1 (0, 1)
Datong	Shanxi	North	Male	5 y～	0 (0, 0)	0 (0, 0)	0 (0, 0)	0 (0, 0)	0 (0, 0)	0 (0, 0)	0 (0, 0)	0 (0, 0)	0 (0, 0)	0 (0, 0)	0 (0, 0)	0 (0, 0)	0 (0, 0)	0 (0, 0)	0 (0, 0)	0 (0, 0)	0 (0, 0)	0 (0, 0)	0 (0, 0)	0 (0, 0)	0 (0, 0)	0 (0, 0)	0 (0, 0)	0 (0, 0)	0 (0, 0)	0 (0, 0)	0 (0, 0)	0 (0, 0)
Datong	Shanxi	North	Male	10 y～	0 (0, 0)	0 (0, 0)	0 (0, 0)	0 (0, 0)	0 (0, 0)	0 (0, 0)	0 (0, 0)	0 (0, 0)	0 (0, 0)	0 (0, 0)	0 (0, 0)	0 (0, 0)	0 (0, 0)	0 (0, 0)	0 (0, 0)	0 (0, 0)	0 (0, 0)	0 (0, 0)	0 (0, 0)	0 (0, 0)	0 (0, 0)	0 (0, 0)	0 (0, 0)	0 (0, 0)	0 (0, 0)	0 (0, 0)	0 (0, 0)	0 (0, 0)
Datong	Shanxi	North	Male	15 y～	0 (0, 0)	0 (0, 0)	0 (0, 0)	1 (1, 1)	0 (0, 0)	0 (0, 0)	0 (0, 0)	0 (0, 0)	0 (0, 0)	0 (0, 0)	0 (0, 0)	0 (0, 0)	0 (0, 0)	0 (0, 0)	0 (0, 0)	0 (0, 0)	0 (0, 0)	0 (0, 0)	0 (0, 0)	0 (0, 0)	0 (0, 0)	0 (0, 0)	0 (0, 0)	0 (0, 0)	0 (0, 0)	1 (1, 1)	0 (0, 0)	1 (1, 1)
Datong	Shanxi	North	Male	20 y～	0 (0, 0)	0 (0, 0)	0 (0, 0)	1 (1, 1)	0 (0, 0)	0 (0, 0)	0 (0, 0)	0 (0, 0)	0 (0, 0)	0 (0, 0)	0 (0, 0)	0 (0, 0)	0 (0, 0)	0 (0, 0)	0 (0, 0)	0 (0, 0)	0 (0, 0)	0 (0, 0)	0 (0, 0)	0 (0, 0)	0 (0, 0)	0 (0, 0)	0 (0, 0)	0 (0, 0)	1 (0, 1)	1 (1, 1)	0 (0, 0)	2 (1, 2)
Datong	Shanxi	North	Male	25 y～	0 (0, 0)	0 (0, 0)	0 (0, 0)	1 (1, 1)	0 (0, 0)	0 (0, 0)	0 (0, 0)	0 (0, 0)	0 (0, 0)	0 (0, 0)	0 (0, 0)	0 (0, 0)	0 (0, 0)	0 (0, 0)	0 (0, 0)	0 (0, 0)	0 (0, 0)	0 (0, 0)	0 (0, 0)	0 (0, 0)	0 (0, 0)	0 (0, 0)	0 (0, 0)	1 (1, 1)	1 (1, 1)	1 (1, 1)	0 (0, 0)	2 (2, 2)
Datong	Shanxi	North	Male	30 y～	1 (1, 1)	1 (1, 1)	0 (0, 1)	3 (2, 3)	0 (0, 0)	0 (0, 0)	0 (0, 0)	0 (0, 0)	0 (0, 0)	0 (0, 0)	0 (0, 0)	0 (0, 0)	0 (0, 0)	0 (0, 0)	0 (0, 0)	0 (0, 1)	0 (0, 0)	0 (0, 0)	0 (0, 0)	0 (0, 0)	1 (1, 1)	1 (1, 1)	0 (0, 0)	2 (2, 2)	2 (2, 2)	3 (2, 3)	1 (1, 1)	5 (5, 6)
Datong	Shanxi	North	Male	35 y～	2 (2, 2)	3 (2, 3)	1 (1, 1)	6 (5, 6)	0 (0, 0)	0 (0, 0)	0 (0, 0)	0 (0, 0)	0 (0, 0)	0 (0, 1)	0 (0, 0)	1 (1, 1)	0 (0, 0)	0 (0, 0)	0 (0, 0)	0 (0, 1)	0 (0, 0)	0 (0, 0)	0 (0, 0)	0 (0, 0)	1 (1, 2)	2 (2, 2)	1 (1, 1)	4 (4, 5)	4 (3, 5)	6 (5, 6)	2 (2, 2)	12 (10, 13)
Datong	Shanxi	North	Male	40 y～	4 (3, 4)	5 (5, 6)	2 (2, 2)	11 (10, 13)	0 (0, 0)	0 (0, 0)	0 (0, 0)	0 (0, 0)	1 (0, 1)	1 (1, 1)	0 (0, 0)	2 (1, 2)	0 (0, 0)	0 (0, 1)	0 (0, 0)	1 (1, 1)	0 (0, 0)	0 (0, 0)	0 (0, 0)	0 (0, 0)	3 (3, 3)	4 (4, 5)	2 (1, 2)	9 (8, 10)	8 (7, 9)	11 (9, 13)	4 (4, 5)	23 (20, 26)
Datong	Shanxi	North	Male	45 y～	5 (4, 5)	6 (5, 7)	3 (2, 3)	14 (12, 16)	0 (0, 0)	0 (0, 0)	0 (0, 0)	1 (0, 1)	1 (1, 1)	1 (1, 2)	1 (0, 1)	3 (2, 4)	0 (0, 0)	0 (0, 0)	0 (0, 0)	1 (1, 1)	0 (0, 0)	0 (0, 0)	0 (0, 0)	1 (0, 1)	5 (4, 5)	6 (5, 7)	3 (2, 3)	13 (12, 15)	11 (10, 13)	15 (12, 16)	6 (5, 7)	32 (27, 37)
Datong	Shanxi	North	Male	50 y～	6 (5, 6)	8 (6, 8)	3 (3, 4)	17 (14, 18)	0 (0, 0)	0 (0, 0)	0 (0, 0)	1 (1, 1)	2 (2, 3)	3 (2, 3)	1 (1, 1)	6 (5, 7)	0 (0, 1)	1 (0, 1)	0 (0, 0)	1 (1, 1)	0 (0, 0)	0 (0, 0)	0 (0, 0)	1 (0, 1)	6 (5, 6)	7 (6, 8)	3 (3, 4)	16 (14, 19)	15 (12, 17)	19 (16, 21)	8 (7, 9)	42 (35, 48)
Datong	Shanxi	North	Male	55 y～	10 (8, 11)	13 (11, 14)	6 (5, 6)	28 (24, 31)	1 (1, 1)	1 (1, 1)	1 (0, 1)	3 (2, 3)	5 (4, 7)	6 (5, 8)	3 (2, 3)	15 (11, 18)	1 (1, 1)	1 (1, 1)	0 (0, 0)	2 (2, 2)	1 (0, 1)	1 (0, 1)	0 (0, 0)	1 (1, 2)	10 (9, 11)	13 (11, 15)	6 (5, 6)	29 (25, 32)	28 (23, 32)	35 (29, 40)	15 (13, 18)	78 (65, 89)
Datong	Shanxi	North	Male	60 y～	8 (7, 9)	11 (9, 12)	4 (4, 5)	23 (19, 25)	2 (1, 2)	2 (1, 2)	1 (1, 1)	4 (4, 5)	7 (5, 8)	7 (5, 8)	3 (3, 4)	17 (13, 20)	1 (1, 1)	1 (1, 1)	0 (0, 1)	2 (2, 3)	0 (0, 1)	0 (0, 1)	0 (0, 0)	1 (1, 1)	9 (8, 10)	13 (11, 14)	5 (4, 6)	27 (23, 30)	27 (22, 31)	33 (27, 38)	14 (12, 16)	74 (61, 86)
Datong	Shanxi	North	Male	65 y～	8 (6, 9)	11 (9, 12)	4 (4, 5)	23 (19, 25)	2 (2, 3)	2 (2, 3)	1 (1, 1)	6 (5, 7)	7 (6, 9)	7 (6, 9)	4 (3, 5)	19 (14, 23)	1 (1, 2)	1 (1, 2)	1 (1, 1)	3 (3, 4)	1 (0, 1)	1 (0, 1)	0 (0, 0)	1 (1, 2)	10 (8, 11)	13 (11, 15)	5 (5, 6)	29 (24, 33)	29 (24, 34)	36 (30, 41)	15 (13, 18)	80 (66, 93)
Datong	Shanxi	North	Male	70 y～	9 (8, 11)	13 (10, 15)	5 (4, 6)	27 (22, 31)	5 (4, 5)	5 (4, 5)	2 (2, 3)	12 (10, 14)	8 (6, 10)	8 (6, 10)	4 (3, 5)	21 (16, 25)	2 (2, 3)	2 (2, 3)	1 (1, 1)	5 (4, 7)	1 (1, 1)	1 (1, 1)	0 (0, 0)	2 (1, 2)	13 (11, 14)	17 (15, 20)	7 (6, 8)	37 (32, 42)	38 (31, 44)	46 (38, 54)	20 (16, 23)	104 (85, 121)
Datong	Shanxi	North	Male	75 y～	11 (9, 13)	15 (12, 18)	6 (5, 7)	32 (26, 37)	7 (6, 9)	7 (6, 9)	4 (3, 4)	19 (16, 22)	8 (6, 10)	8 (6, 10)	4 (3, 5)	21 (16, 25)	3 (2, 4)	3 (2, 4)	2 (1, 2)	8 (6, 10)	1 (1, 1)	1 (1, 1)	0 (0, 1)	2 (2, 3)	15 (12, 16)	20 (17, 22)	8 (7, 9)	42 (36, 48)	45 (37, 53)	55 (45, 64)	24 (20, 28)	124 (101, 145)
Datong	Shanxi	North	Male	80 y～	8 (7, 10)	12 (10, 14)	4 (4, 5)	25 (20, 28)	6 (5, 7)	9 (7, 10)	3 (3, 4)	18 (15, 21)	4 (3, 5)	5 (4, 6)	2 (2, 3)	11 (8, 14)	3 (2, 4)	4 (3, 5)	2 (1, 2)	9 (7, 11)	1 (0, 1)	1 (1, 1)	0 (0, 0)	2 (1, 2)	10 (9, 11)	14 (12, 16)	5 (4, 6)	29 (25, 33)	32 (26, 37)	45 (37, 52)	17 (14, 20)	93 (76, 109)
Datong	Shanxi	North	Male	85 y～	8 (6, 9)	11 (9, 13)	4 (3, 5)	22 (18, 26)	6 (5, 7)	9 (7, 10)	3 (3, 4)	18 (15, 21)	2 (2, 3)	3 (2, 4)	1 (1, 2)	7 (5, 8)	5 (4, 6)	7 (5, 8)	3 (2, 3)	14 (11, 18)	0 (0, 0)	1 (0, 1)	0 (0, 0)	1 (1, 1)	7 (6, 8)	10 (8, 11)	4 (3, 4)	20 (17, 23)	28 (23, 33)	40 (32, 46)	15 (12, 18)	83 (67, 97)
Datong	Shanxi	North	Female	0 y～	0 (0, 0)	0 (0, 0)	0 (0, 0)	0 (0, 0)	0 (0, 0)	0 (0, 0)	0 (0, 0)	0 (0, 0)	0 (0, 0)	0 (0, 0)	0 (0, 0)	0 (0, 0)	0 (0, 0)	0 (0, 0)	0 (0, 0)	1 (0, 1)	0 (0, 0)	0 (0, 0)	0 (0, 0)	0 (0, 0)	0 (0, 0)	0 (0, 0)	0 (0, 0)	0 (0, 0)	0 (0, 0)	0 (0, 0)	0 (0, 0)	1 (0, 1)
Datong	Shanxi	North	Female	1 y～	0 (0, 0)	0 (0, 0)	0 (0, 0)	0 (0, 0)	0 (0, 0)	0 (0, 0)	0 (0, 0)	0 (0, 0)	0 (0, 0)	0 (0, 0)	0 (0, 0)	0 (0, 0)	0 (0, 0)	0 (0, 0)	0 (0, 0)	0 (0, 1)	0 (0, 0)	0 (0, 0)	0 (0, 0)	0 (0, 0)	0 (0, 0)	0 (0, 0)	0 (0, 0)	0 (0, 0)	0 (0, 0)	0 (0, 0)	0 (0, 0)	0 (0, 1)
Datong	Shanxi	North	Female	5 y～	0 (0, 0)	0 (0, 0)	0 (0, 0)	0 (0, 0)	0 (0, 0)	0 (0, 0)	0 (0, 0)	0 (0, 0)	0 (0, 0)	0 (0, 0)	0 (0, 0)	0 (0, 0)	0 (0, 0)	0 (0, 0)	0 (0, 0)	0 (0, 0)	0 (0, 0)	0 (0, 0)	0 (0, 0)	0 (0, 0)	0 (0, 0)	0 (0, 0)	0 (0, 0)	0 (0, 0)	0 (0, 0)	0 (0, 0)	0 (0, 0)	0 (0, 0)
Datong	Shanxi	North	Female	10 y～	0 (0, 0)	0 (0, 0)	0 (0, 0)	0 (0, 0)	0 (0, 0)	0 (0, 0)	0 (0, 0)	0 (0, 0)	0 (0, 0)	0 (0, 0)	0 (0, 0)	0 (0, 0)	0 (0, 0)	0 (0, 0)	0 (0, 0)	0 (0, 0)	0 (0, 0)	0 (0, 0)	0 (0, 0)	0 (0, 0)	0 (0, 0)	0 (0, 0)	0 (0, 0)	0 (0, 0)	0 (0, 0)	0 (0, 0)	0 (0, 0)	0 (0, 0)
Datong	Shanxi	North	Female	15 y～	0 (0, 0)	0 (0, 0)	0 (0, 0)	0 (0, 0)	0 (0, 0)	0 (0, 0)	0 (0, 0)	0 (0, 0)	0 (0, 0)	0 (0, 0)	0 (0, 0)	0 (0, 0)	0 (0, 0)	0 (0, 0)	0 (0, 0)	0 (0, 0)	0 (0, 0)	0 (0, 0)	0 (0, 0)	0 (0, 0)	0 (0, 0)	0 (0, 0)	0 (0, 0)	0 (0, 0)	0 (0, 0)	0 (0, 1)	0 (0, 0)	1 (1, 1)
Datong	Shanxi	North	Female	20 y～	0 (0, 0)	0 (0, 0)	0 (0, 0)	0 (0, 0)	0 (0, 0)	0 (0, 0)	0 (0, 0)	0 (0, 0)	0 (0, 0)	0 (0, 0)	0 (0, 0)	0 (0, 0)	0 (0, 0)	0 (0, 0)	0 (0, 0)	0 (0, 0)	0 (0, 0)	0 (0, 0)	0 (0, 0)	0 (0, 0)	0 (0, 0)	0 (0, 0)	0 (0, 0)	0 (0, 0)	0 (0, 0)	0 (0, 0)	0 (0, 0)	1 (0, 1)
Datong	Shanxi	North	Female	25 y～	0 (0, 0)	0 (0, 0)	0 (0, 0)	0 (0, 0)	0 (0, 0)	0 (0, 0)	0 (0, 0)	0 (0, 0)	0 (0, 0)	0 (0, 0)	0 (0, 0)	0 (0, 0)	0 (0, 0)	0 (0, 0)	0 (0, 0)	0 (0, 0)	0 (0, 0)	0 (0, 0)	0 (0, 0)	0 (0, 0)	0 (0, 0)	0 (0, 0)	0 (0, 0)	0 (0, 0)	0 (0, 0)	0 (0, 0)	0 (0, 0)	1 (1, 1)
Datong	Shanxi	North	Female	30 y～	0 (0, 0)	0 (0, 0)	0 (0, 0)	1 (0, 1)	0 (0, 0)	0 (0, 0)	0 (0, 0)	0 (0, 0)	0 (0, 0)	0 (0, 0)	0 (0, 0)	0 (0, 0)	0 (0, 0)	0 (0, 0)	0 (0, 0)	0 (0, 0)	0 (0, 0)	0 (0, 0)	0 (0, 0)	0 (0, 0)	0 (0, 0)	0 (0, 0)	0 (0, 0)	1 (1, 1)	0 (0, 1)	1 (1, 1)	0 (0, 0)	1 (1, 2)
Datong	Shanxi	North	Female	35 y～	0 (0, 1)	1 (1, 1)	0 (0, 0)	2 (1, 2)	0 (0, 0)	0 (0, 0)	0 (0, 0)	0 (0, 0)	0 (0, 0)	0 (0, 0)	0 (0, 0)	0 (0, 1)	0 (0, 0)	0 (0, 0)	0 (0, 0)	0 (0, 0)	0 (0, 0)	0 (0, 0)	0 (0, 0)	0 (0, 0)	0 (0, 0)	0 (0, 1)	0 (0, 0)	1 (1, 1)	1 (1, 1)	2 (2, 2)	0 (0, 0)	3 (3, 4)
Datong	Shanxi	North	Female	40 y～	1 (1, 1)	1 (1, 2)	0 (0, 0)	2 (2, 3)	0 (0, 0)	0 (0, 0)	0 (0, 0)	0 (0, 0)	0 (0, 0)	1 (0, 1)	0 (0, 0)	1 (1, 1)	0 (0, 0)	0 (0, 0)	0 (0, 0)	0 (0, 0)	0 (0, 0)	0 (0, 0)	0 (0, 0)	0 (0, 0)	1 (1, 1)	1 (1, 2)	0 (0, 0)	2 (2, 3)	2 (2, 2)	4 (3, 4)	1 (1, 1)	6 (5, 7)
Datong	Shanxi	North	Female	45 y～	1 (1, 1)	2 (2, 2)	0 (0, 0)	3 (3, 4)	0 (0, 0)	0 (0, 0)	0 (0, 0)	0 (0, 0)	0 (0, 1)	1 (1, 1)	0 (0, 0)	2 (1, 2)	0 (0, 0)	0 (0, 1)	0 (0, 0)	1 (1, 1)	0 (0, 0)	0 (0, 0)	0 (0, 0)	0 (0, 0)	1 (1, 1)	2 (2, 3)	0 (0, 0)	4 (3, 4)	3 (3, 3)	6 (5, 7)	1 (1, 1)	10 (9, 12)
Datong	Shanxi	North	Female	50 y～	1 (1, 2)	3 (2, 3)	1 (0, 1)	5 (4, 5)	0 (0, 0)	0 (0, 0)	0 (0, 0)	0 (0, 0)	1 (1, 1)	2 (1, 2)	0 (0, 0)	3 (2, 3)	0 (0, 0)	0 (0, 0)	0 (0, 0)	0 (0, 1)	0 (0, 0)	0 (0, 0)	0 (0, 0)	0 (0, 0)	2 (2, 2)	3 (3, 4)	1 (1, 1)	6 (5, 6)	4 (4, 5)	8 (7, 9)	2 (1, 2)	14 (12, 16)
Datong	Shanxi	North	Female	55 y～	3 (2, 3)	5 (4, 5)	1 (1, 1)	8 (7, 9)	0 (0, 0)	1 (0, 1)	0 (0, 0)	1 (1, 1)	1 (1, 2)	3 (2, 4)	1 (0, 1)	5 (4, 6)	0 (0, 0)	1 (0, 1)	0 (0, 0)	1 (1, 1)	0 (0, 0)	0 (0, 0)	0 (0, 0)	1 (0, 1)	3 (2, 3)	5 (4, 5)	1 (1, 1)	8 (7, 9)	7 (6, 8)	14 (12, 16)	3 (2, 3)	24 (20, 27)
Datong	Shanxi	North	Female	60 y～	3 (2, 3)	5 (4, 6)	1 (1, 1)	9 (7, 10)	0 (0, 0)	1 (1, 1)	0 (0, 0)	1 (1, 1)	1 (1, 2)	3 (2, 4)	0 (0, 1)	5 (4, 6)	0 (0, 0)	1 (0, 1)	0 (0, 0)	1 (1, 1)	0 (0, 0)	0 (0, 1)	0 (0, 0)	1 (1, 1)	3 (3, 4)	6 (5, 6)	1 (1, 1)	10 (8, 11)	8 (7, 9)	16 (13, 18)	3 (2, 3)	27 (22, 30)
Datong	Shanxi	North	Female	65 y～	4 (3, 4)	7 (6, 8)	1 (1, 1)	12 (10, 13)	1 (1, 1)	1 (1, 2)	0 (0, 0)	2 (2, 3)	2 (1, 2)	4 (3, 5)	1 (0, 1)	6 (5, 7)	0 (0, 1)	1 (1, 1)	0 (0, 0)	2 (1, 2)	0 (0, 0)	1 (1, 1)	0 (0, 0)	1 (1, 1)	4 (4, 5)	8 (7, 9)	1 (1, 2)	13 (11, 15)	11 (9, 13)	21 (18, 25)	4 (3, 4)	36 (30, 42)
Datong	Shanxi	North	Female	70 y～	6 (5, 7)	10 (8, 12)	2 (2, 2)	18 (15, 21)	1 (1, 1)	3 (2, 3)	0 (0, 0)	4 (3, 5)	2 (2, 3)	4 (3, 5)	1 (0, 1)	7 (5, 9)	1 (1, 1)	2 (1, 2)	0 (0, 0)	3 (2, 3)	0 (0, 1)	1 (1, 1)	0 (0, 0)	2 (1, 2)	6 (5, 7)	12 (10, 13)	2 (2, 2)	20 (17, 23)	17 (14, 19)	32 (26, 37)	5 (4, 6)	54 (44, 62)
Datong	Shanxi	North	Female	75 y～	9 (7, 10)	16 (13, 18)	3 (2, 3)	27 (22, 32)	2 (2, 3)	5 (4, 6)	1 (1, 1)	8 (7, 9)	3 (2, 3)	6 (4, 7)	1 (1, 1)	9 (7, 11)	2 (1, 2)	3 (3, 4)	0 (0, 1)	5 (4, 7)	1 (1, 1)	2 (1, 2)	0 (0, 0)	3 (2, 3)	10 (8, 11)	18 (15, 20)	3 (3, 4)	31 (26, 35)	26 (21, 30)	49 (40, 57)	8 (7, 10)	83 (69, 97)
Datong	Shanxi	North	Female	80 y～	9 (7, 10)	15 (12, 18)	3 (3, 4)	27 (22, 32)	3 (3, 4)	6 (5, 7)	1 (1, 2)	10 (8, 12)	2 (2, 3)	4 (3, 5)	1 (1, 1)	7 (5, 8)	2 (2, 3)	4 (3, 5)	1 (1, 1)	7 (5, 9)	1 (0, 1)	1 (1, 1)	0 (0, 0)	2 (2, 2)	9 (7, 10)	15 (13, 17)	3 (3, 4)	27 (23, 30)	25 (20, 29)	45 (37, 53)	10 (8, 11)	80 (65, 93)
Datong	Shanxi	North	Female	85 y～	11 (8, 13)	19 (15, 22)	4 (3, 5)	34 (27, 39)	5 (4, 6)	9 (8, 10)	2 (2, 3)	16 (13, 19)	1 (1, 2)	3 (2, 3)	1 (0, 1)	5 (4, 6)	4 (3, 5)	8 (6, 10)	2 (1, 2)	14 (11, 18)	1 (0, 1)	1 (1, 1)	0 (0, 0)	2 (1, 2)	8 (7, 9)	15 (12, 17)	3 (3, 3)	26 (22, 30)	30 (24, 35)	54 (44, 64)	12 (10, 14)	96 (78, 113)
Jincheng	Shanxi	North	Male	0 y～	0 (0, 0)	0 (0, 0)	0 (0, 0)	0 (0, 0)	0 (0, 0)	0 (0, 0)	0 (0, 0)	0 (0, 0)	0 (0, 0)	0 (0, 0)	0 (0, 0)	0 (0, 0)	0 (0, 0)	0 (0, 0)	0 (0, 0)	0 (0, 0)	0 (0, 0)	0 (0, 0)	0 (0, 0)	0 (0, 0)	0 (0, 0)	0 (0, 0)	0 (0, 0)	0 (0, 0)	0 (0, 0)	0 (0, 0)	0 (0, 0)	0 (0, 0)
Jincheng	Shanxi	North	Male	1 y～	0 (0, 0)	0 (0, 0)	0 (0, 0)	0 (0, 0)	0 (0, 0)	0 (0, 0)	0 (0, 0)	0 (0, 0)	0 (0, 0)	0 (0, 0)	0 (0, 0)	0 (0, 0)	0 (0, 0)	0 (0, 0)	0 (0, 0)	0 (0, 0)	0 (0, 0)	0 (0, 0)	0 (0, 0)	0 (0, 0)	0 (0, 0)	0 (0, 0)	0 (0, 0)	0 (0, 0)	0 (0, 0)	0 (0, 0)	0 (0, 0)	0 (0, 0)
Jincheng	Shanxi	North	Male	5 y～	0 (0, 0)	0 (0, 0)	0 (0, 0)	0 (0, 0)	0 (0, 0)	0 (0, 0)	0 (0, 0)	0 (0, 0)	0 (0, 0)	0 (0, 0)	0 (0, 0)	0 (0, 0)	0 (0, 0)	0 (0, 0)	0 (0, 0)	0 (0, 0)	0 (0, 0)	0 (0, 0)	0 (0, 0)	0 (0, 0)	0 (0, 0)	0 (0, 0)	0 (0, 0)	0 (0, 0)	0 (0, 0)	0 (0, 0)	0 (0, 0)	0 (0, 0)
Jincheng	Shanxi	North	Male	10 y～	0 (0, 0)	0 (0, 0)	0 (0, 0)	0 (0, 0)	0 (0, 0)	0 (0, 0)	0 (0, 0)	0 (0, 0)	0 (0, 0)	0 (0, 0)	0 (0, 0)	0 (0, 0)	0 (0, 0)	0 (0, 0)	0 (0, 0)	0 (0, 0)	0 (0, 0)	0 (0, 0)	0 (0, 0)	0 (0, 0)	0 (0, 0)	0 (0, 0)	0 (0, 0)	0 (0, 0)	0 (0, 0)	0 (0, 0)	0 (0, 0)	0 (0, 0)
Jincheng	Shanxi	North	Male	15 y～	0 (0, 0)	0 (0, 0)	0 (0, 0)	0 (0, 0)	0 (0, 0)	0 (0, 0)	0 (0, 0)	0 (0, 0)	0 (0, 0)	0 (0, 0)	0 (0, 0)	0 (0, 0)	0 (0, 0)	0 (0, 0)	0 (0, 0)	0 (0, 0)	0 (0, 0)	0 (0, 0)	0 (0, 0)	0 (0, 0)	0 (0, 0)	0 (0, 0)	0 (0, 0)	0 (0, 0)	0 (0, 0)	0 (0, 0)	0 (0, 0)	0 (0, 0)
Jincheng	Shanxi	North	Male	20 y～	0 (0, 0)	0 (0, 0)	0 (0, 0)	0 (0, 0)	0 (0, 0)	0 (0, 0)	0 (0, 0)	0 (0, 0)	0 (0, 0)	0 (0, 0)	0 (0, 0)	0 (0, 0)	0 (0, 0)	0 (0, 0)	0 (0, 0)	0 (0, 0)	0 (0, 0)	0 (0, 0)	0 (0, 0)	0 (0, 0)	0 (0, 0)	0 (0, 0)	0 (0, 0)	0 (0, 0)	0 (0, 0)	0 (0, 0)	0 (0, 0)	0 (0, 0)
Jincheng	Shanxi	North	Male	25 y～	0 (0, 0)	0 (0, 0)	0 (0, 0)	0 (0, 0)	0 (0, 0)	0 (0, 0)	0 (0, 0)	0 (0, 0)	0 (0, 0)	0 (0, 0)	0 (0, 0)	0 (0, 0)	0 (0, 0)	0 (0, 0)	0 (0, 0)	0 (0, 0)	0 (0, 0)	0 (0, 0)	0 (0, 0)	0 (0, 0)	0 (0, 0)	0 (0, 0)	0 (0, 0)	0 (0, 0)	0 (0, 0)	0 (0, 0)	0 (0, 0)	1 (0, 1)
Jincheng	Shanxi	North	Male	30 y～	0 (0, 0)	0 (0, 0)	0 (0, 0)	1 (1, 1)	0 (0, 0)	0 (0, 0)	0 (0, 0)	0 (0, 0)	0 (0, 0)	0 (0, 0)	0 (0, 0)	0 (0, 0)	0 (0, 0)	0 (0, 0)	0 (0, 0)	0 (0, 0)	0 (0, 0)	0 (0, 0)	0 (0, 0)	0 (0, 0)	0 (0, 0)	0 (0, 0)	0 (0, 0)	0 (0, 1)	1 (1, 1)	1 (0, 1)	0 (0, 0)	1 (1, 2)
Jincheng	Shanxi	North	Male	35 y～	1 (1, 1)	1 (1, 1)	0 (0, 0)	2 (1, 2)	0 (0, 0)	0 (0, 0)	0 (0, 0)	0 (0, 0)	0 (0, 0)	0 (0, 0)	0 (0, 0)	0 (0, 0)	0 (0, 0)	0 (0, 0)	0 (0, 0)	0 (0, 0)	0 (0, 0)	0 (0, 0)	0 (0, 0)	0 (0, 0)	1 (0, 1)	0 (0, 0)	0 (0, 0)	1 (1, 1)	1 (1, 2)	1 (1, 1)	1 (0, 1)	3 (3, 4)
Jincheng	Shanxi	North	Male	40 y～	1 (1, 2)	1 (1, 1)	1 (0, 1)	3 (3, 3)	0 (0, 0)	0 (0, 0)	0 (0, 0)	0 (0, 0)	0 (0, 0)	0 (0, 0)	0 (0, 0)	0 (0, 1)	0 (0, 0)	0 (0, 0)	0 (0, 0)	0 (0, 0)	0 (0, 0)	0 (0, 0)	0 (0, 0)	0 (0, 0)	1 (1, 1)	1 (1, 1)	0 (0, 0)	2 (2, 3)	3 (3, 3)	2 (2, 3)	1 (1, 1)	6 (5, 7)
Jincheng	Shanxi	North	Male	45 y～	2 (2, 2)	1 (1, 1)	1 (1, 1)	4 (3, 4)	0 (0, 0)	0 (0, 0)	0 (0, 0)	0 (0, 0)	0 (0, 1)	0 (0, 0)	0 (0, 0)	1 (1, 1)	0 (0, 0)	0 (0, 0)	0 (0, 0)	0 (0, 0)	0 (0, 0)	0 (0, 0)	0 (0, 0)	0 (0, 0)	2 (2, 2)	1 (1, 1)	1 (1, 1)	4 (3, 4)	4 (4, 5)	3 (2, 3)	2 (1, 2)	9 (7, 10)
Jincheng	Shanxi	North	Male	50 y～	2 (2, 2)	1 (1, 2)	1 (1, 1)	4 (4, 5)	0 (0, 0)	0 (0, 0)	0 (0, 0)	0 (0, 0)	1 (1, 1)	1 (0, 1)	0 (0, 0)	2 (1, 2)	0 (0, 0)	0 (0, 0)	0 (0, 0)	0 (0, 0)	0 (0, 0)	0 (0, 0)	0 (0, 0)	0 (0, 0)	2 (2, 2)	1 (1, 2)	1 (1, 1)	4 (4, 5)	5 (5, 6)	4 (3, 4)	2 (2, 2)	11 (10, 13)
Jincheng	Shanxi	North	Male	55 y～	4 (3, 4)	3 (2, 3)	1 (1, 2)	8 (7, 8)	0 (0, 0)	0 (0, 0)	0 (0, 0)	1 (1, 1)	2 (2, 2)	1 (1, 1)	1 (1, 1)	4 (3, 5)	0 (0, 0)	0 (0, 0)	0 (0, 0)	1 (0, 1)	0 (0, 0)	0 (0, 0)	0 (0, 0)	0 (0, 0)	4 (3, 4)	3 (2, 3)	1 (1, 2)	8 (7, 9)	10 (9, 12)	7 (6, 8)	4 (3, 4)	21 (18, 24)
Jincheng	Shanxi	North	Male	60 y～	3 (2, 3)	2 (2, 2)	1 (1, 1)	6 (5, 7)	1 (1, 1)	0 (0, 0)	0 (0, 0)	1 (1, 1)	2 (2, 3)	1 (1, 2)	1 (1, 1)	5 (3, 6)	0 (0, 0)	0 (0, 0)	0 (0, 0)	1 (1, 1)	0 (0, 0)	0 (0, 0)	0 (0, 0)	0 (0, 0)	3 (3, 4)	3 (2, 3)	1 (1, 1)	7 (6, 8)	10 (8, 11)	7 (6, 8)	4 (3, 4)	20 (17, 23)
Jincheng	Shanxi	North	Male	65 y～	3 (2, 3)	2 (2, 2)	1 (1, 1)	6 (5, 7)	1 (1, 1)	0 (0, 1)	0 (0, 0)	2 (1, 2)	3 (2, 3)	1 (1, 2)	1 (1, 1)	5 (4, 6)	0 (0, 1)	0 (0, 0)	0 (0, 0)	1 (1, 1)	0 (0, 0)	0 (0, 0)	0 (0, 0)	0 (0, 0)	4 (3, 4)	3 (2, 3)	1 (1, 2)	8 (7, 9)	11 (9, 12)	7 (6, 8)	4 (3, 5)	22 (18, 25)
Jincheng	Shanxi	North	Male	70 y～	3 (3, 4)	3 (2, 3)	1 (1, 1)	7 (6, 8)	2 (1, 2)	1 (1, 1)	1 (1, 1)	3 (3, 4)	3 (2, 4)	2 (1, 2)	1 (1, 1)	6 (4, 7)	1 (1, 1)	0 (0, 1)	0 (0, 0)	1 (1, 2)	0 (0, 0)	0 (0, 0)	0 (0, 0)	0 (0, 1)	5 (4, 5)	4 (3, 4)	2 (2, 2)	10 (9, 11)	14 (11, 16)	9 (8, 11)	5 (4, 6)	28 (24, 33)
Jincheng	Shanxi	North	Male	75 y～	4 (3, 5)	3 (3, 4)	2 (1, 2)	9 (7, 10)	3 (2, 3)	2 (1, 2)	1 (1, 1)	5 (4, 6)	3 (2, 4)	2 (1, 2)	1 (1, 1)	6 (4, 7)	1 (1, 1)	1 (1, 1)	0 (0, 1)	2 (2, 3)	0 (0, 0)	0 (0, 0)	0 (0, 0)	1 (0, 1)	6 (5, 6)	4 (4, 5)	2 (2, 2)	12 (10, 13)	17 (14, 19)	11 (9, 13)	6 (5, 7)	34 (28, 39)
Jincheng	Shanxi	North	Male	80 y～	3 (3, 4)	2 (2, 3)	1 (1, 1)	7 (5, 8)	2 (2, 3)	2 (1, 2)	1 (1, 1)	5 (4, 6)	1 (1, 2)	1 (1, 1)	1 (0, 1)	3 (2, 4)	1 (1, 1)	1 (1, 1)	0 (0, 1)	2 (2, 3)	0 (0, 0)	0 (0, 0)	0 (0, 0)	0 (0, 0)	4 (3, 4)	3 (3, 3)	1 (1, 2)	8 (7, 9)	12 (10, 14)	9 (8, 11)	4 (4, 5)	25 (21, 29)
Jincheng	Shanxi	North	Male	85 y～	3 (2, 3)	2 (2, 3)	1 (1, 1)	6 (5, 7)	2 (2, 3)	2 (2, 2)	1 (1, 1)	5 (4, 6)	1 (1, 1)	1 (0, 1)	0 (0, 0)	2 (1, 2)	2 (1, 2)	1 (1, 2)	1 (1, 1)	4 (3, 5)	0 (0, 0)	0 (0, 0)	0 (0, 0)	0 (0, 0)	3 (2, 3)	2 (2, 2)	1 (1, 1)	5 (5, 6)	10 (9, 12)	8 (7, 9)	4 (3, 5)	22 (18, 26)
Jincheng	Shanxi	North	Female	0 y～	0 (0, 0)	0 (0, 0)	0 (0, 0)	0 (0, 0)	0 (0, 0)	0 (0, 0)	0 (0, 0)	0 (0, 0)	0 (0, 0)	0 (0, 0)	0 (0, 0)	0 (0, 0)	0 (0, 0)	0 (0, 0)	0 (0, 0)	0 (0, 0)	0 (0, 0)	0 (0, 0)	0 (0, 0)	0 (0, 0)	0 (0, 0)	0 (0, 0)	0 (0, 0)	0 (0, 0)	0 (0, 0)	0 (0, 0)	0 (0, 0)	0 (0, 0)
Jincheng	Shanxi	North	Female	1 y～	0 (0, 0)	0 (0, 0)	0 (0, 0)	0 (0, 0)	0 (0, 0)	0 (0, 0)	0 (0, 0)	0 (0, 0)	0 (0, 0)	0 (0, 0)	0 (0, 0)	0 (0, 0)	0 (0, 0)	0 (0, 0)	0 (0, 0)	0 (0, 0)	0 (0, 0)	0 (0, 0)	0 (0, 0)	0 (0, 0)	0 (0, 0)	0 (0, 0)	0 (0, 0)	0 (0, 0)	0 (0, 0)	0 (0, 0)	0 (0, 0)	0 (0, 0)
Jincheng	Shanxi	North	Female	5 y～	0 (0, 0)	0 (0, 0)	0 (0, 0)	0 (0, 0)	0 (0, 0)	0 (0, 0)	0 (0, 0)	0 (0, 0)	0 (0, 0)	0 (0, 0)	0 (0, 0)	0 (0, 0)	0 (0, 0)	0 (0, 0)	0 (0, 0)	0 (0, 0)	0 (0, 0)	0 (0, 0)	0 (0, 0)	0 (0, 0)	0 (0, 0)	0 (0, 0)	0 (0, 0)	0 (0, 0)	0 (0, 0)	0 (0, 0)	0 (0, 0)	0 (0, 0)
Jincheng	Shanxi	North	Female	10 y～	0 (0, 0)	0 (0, 0)	0 (0, 0)	0 (0, 0)	0 (0, 0)	0 (0, 0)	0 (0, 0)	0 (0, 0)	0 (0, 0)	0 (0, 0)	0 (0, 0)	0 (0, 0)	0 (0, 0)	0 (0, 0)	0 (0, 0)	0 (0, 0)	0 (0, 0)	0 (0, 0)	0 (0, 0)	0 (0, 0)	0 (0, 0)	0 (0, 0)	0 (0, 0)	0 (0, 0)	0 (0, 0)	0 (0, 0)	0 (0, 0)	0 (0, 0)
Jincheng	Shanxi	North	Female	15 y～	0 (0, 0)	0 (0, 0)	0 (0, 0)	0 (0, 0)	0 (0, 0)	0 (0, 0)	0 (0, 0)	0 (0, 0)	0 (0, 0)	0 (0, 0)	0 (0, 0)	0 (0, 0)	0 (0, 0)	0 (0, 0)	0 (0, 0)	0 (0, 0)	0 (0, 0)	0 (0, 0)	0 (0, 0)	0 (0, 0)	0 (0, 0)	0 (0, 0)	0 (0, 0)	0 (0, 0)	0 (0, 0)	0 (0, 0)	0 (0, 0)	0 (0, 0)
Jincheng	Shanxi	North	Female	20 y～	0 (0, 0)	0 (0, 0)	0 (0, 0)	0 (0, 0)	0 (0, 0)	0 (0, 0)	0 (0, 0)	0 (0, 0)	0 (0, 0)	0 (0, 0)	0 (0, 0)	0 (0, 0)	0 (0, 0)	0 (0, 0)	0 (0, 0)	0 (0, 0)	0 (0, 0)	0 (0, 0)	0 (0, 0)	0 (0, 0)	0 (0, 0)	0 (0, 0)	0 (0, 0)	0 (0, 0)	0 (0, 0)	0 (0, 0)	0 (0, 0)	0 (0, 0)
Jincheng	Shanxi	North	Female	25 y～	0 (0, 0)	0 (0, 0)	0 (0, 0)	0 (0, 0)	0 (0, 0)	0 (0, 0)	0 (0, 0)	0 (0, 0)	0 (0, 0)	0 (0, 0)	0 (0, 0)	0 (0, 0)	0 (0, 0)	0 (0, 0)	0 (0, 0)	0 (0, 0)	0 (0, 0)	0 (0, 0)	0 (0, 0)	0 (0, 0)	0 (0, 0)	0 (0, 0)	0 (0, 0)	0 (0, 0)	0 (0, 0)	0 (0, 0)	0 (0, 0)	0 (0, 0)
Jincheng	Shanxi	North	Female	30 y～	0 (0, 0)	0 (0, 0)	0 (0, 0)	0 (0, 0)	0 (0, 0)	0 (0, 0)	0 (0, 0)	0 (0, 0)	0 (0, 0)	0 (0, 0)	0 (0, 0)	0 (0, 0)	0 (0, 0)	0 (0, 0)	0 (0, 0)	0 (0, 0)	0 (0, 0)	0 (0, 0)	0 (0, 0)	0 (0, 0)	0 (0, 0)	0 (0, 0)	0 (0, 0)	0 (0, 0)	0 (0, 0)	0 (0, 0)	0 (0, 0)	0 (0, 0)
Jincheng	Shanxi	North	Female	35 y～	0 (0, 0)	0 (0, 0)	0 (0, 0)	0 (0, 0)	0 (0, 0)	0 (0, 0)	0 (0, 0)	0 (0, 0)	0 (0, 0)	0 (0, 0)	0 (0, 0)	0 (0, 0)	0 (0, 0)	0 (0, 0)	0 (0, 0)	0 (0, 0)	0 (0, 0)	0 (0, 0)	0 (0, 0)	0 (0, 0)	0 (0, 0)	0 (0, 0)	0 (0, 0)	0 (0, 0)	0 (0, 0)	0 (0, 0)	0 (0, 0)	1 (1, 1)
Jincheng	Shanxi	North	Female	40 y～	0 (0, 0)	0 (0, 0)	0 (0, 0)	1 (1, 1)	0 (0, 0)	0 (0, 0)	0 (0, 0)	0 (0, 0)	0 (0, 0)	0 (0, 0)	0 (0, 0)	0 (0, 0)	0 (0, 0)	0 (0, 0)	0 (0, 0)	0 (0, 0)	0 (0, 0)	0 (0, 0)	0 (0, 0)	0 (0, 0)	0 (0, 0)	0 (0, 0)	0 (0, 0)	1 (1, 1)	1 (1, 1)	1 (1, 1)	0 (0, 0)	2 (1, 2)
Jincheng	Shanxi	North	Female	45 y～	0 (0, 0)	0 (0, 0)	0 (0, 0)	1 (1, 1)	0 (0, 0)	0 (0, 0)	0 (0, 0)	0 (0, 0)	0 (0, 0)	0 (0, 0)	0 (0, 0)	1 (0, 1)	0 (0, 0)	0 (0, 0)	0 (0, 0)	0 (0, 0)	0 (0, 0)	0 (0, 0)	0 (0, 0)	0 (0, 0)	0 (0, 1)	0 (0, 1)	0 (0, 0)	1 (1, 1)	1 (1, 1)	1 (1, 1)	0 (0, 0)	3 (2, 3)
Jincheng	Shanxi	North	Female	50 y～	1 (0, 1)	1 (0, 1)	0 (0, 0)	1 (1, 1)	0 (0, 0)	0 (0, 0)	0 (0, 0)	0 (0, 0)	0 (0, 0)	0 (0, 0)	0 (0, 0)	1 (1, 1)	0 (0, 0)	0 (0, 0)	0 (0, 0)	0 (0, 0)	0 (0, 0)	0 (0, 0)	0 (0, 0)	0 (0, 0)	1 (1, 1)	1 (1, 1)	0 (0, 0)	1 (1, 2)	2 (1, 2)	2 (1, 2)	0 (0, 0)	4 (3, 4)
Jincheng	Shanxi	North	Female	55 y～	1 (1, 1)	1 (1, 1)	0 (0, 0)	2 (2, 2)	0 (0, 0)	0 (0, 0)	0 (0, 0)	0 (0, 0)	1 (0, 1)	1 (1, 1)	0 (0, 0)	1 (1, 2)	0 (0, 0)	0 (0, 0)	0 (0, 0)	0 (0, 0)	0 (0, 0)	0 (0, 0)	0 (0, 0)	0 (0, 0)	1 (1, 1)	1 (1, 1)	0 (0, 0)	2 (2, 2)	3 (2, 3)	3 (3, 3)	1 (1, 1)	6 (5, 7)
Jincheng	Shanxi	North	Female	60 y～	1 (1, 1)	1 (1, 1)	0 (0, 0)	2 (2, 3)	0 (0, 0)	0 (0, 0)	0 (0, 0)	0 (0, 0)	1 (0, 1)	1 (1, 1)	0 (0, 0)	1 (1, 2)	0 (0, 0)	0 (0, 0)	0 (0, 0)	0 (0, 0)	0 (0, 0)	0 (0, 0)	0 (0, 0)	0 (0, 0)	1 (1, 1)	1 (1, 1)	0 (0, 0)	3 (2, 3)	3 (3, 3)	3 (3, 4)	1 (1, 1)	7 (6, 8)
Jincheng	Shanxi	North	Female	65 y～	1 (1, 2)	2 (1, 2)	0 (0, 0)	3 (3, 4)	0 (0, 0)	0 (0, 0)	0 (0, 0)	1 (1, 1)	1 (1, 1)	1 (1, 1)	0 (0, 0)	2 (1, 2)	0 (0, 0)	0 (0, 0)	0 (0, 0)	0 (0, 1)	0 (0, 0)	0 (0, 0)	0 (0, 0)	0 (0, 0)	2 (1, 2)	2 (1, 2)	0 (0, 0)	4 (3, 4)	4 (3, 5)	5 (4, 5)	1 (1, 1)	10 (8, 11)
Jincheng	Shanxi	North	Female	70 y～	2 (2, 2)	2 (2, 3)	0 (0, 1)	5 (4, 5)	0 (0, 1)	1 (0, 1)	0 (0, 0)	1 (1, 1)	1 (1, 1)	1 (1, 1)	0 (0, 0)	2 (1, 2)	0 (0, 0)	0 (0, 0)	0 (0, 0)	1 (1, 1)	0 (0, 0)	0 (0, 0)	0 (0, 0)	0 (0, 0)	2 (2, 3)	3 (2, 3)	1 (0, 1)	5 (5, 6)	6 (5, 7)	7 (6, 8)	1 (1, 2)	14 (12, 17)
Jincheng	Shanxi	North	Female	75 y～	3 (3, 4)	3 (3, 4)	1 (1, 1)	7 (6, 8)	1 (1, 1)	1 (1, 1)	0 (0, 0)	2 (2, 2)	1 (1, 1)	1 (1, 2)	0 (0, 0)	2 (2, 3)	1 (0, 1)	1 (1, 1)	0 (0, 0)	1 (1, 2)	0 (0, 0)	0 (0, 0)	0 (0, 0)	1 (1, 1)	4 (3, 4)	4 (3, 4)	1 (1, 1)	8 (7, 9)	10 (8, 11)	11 (9, 12)	2 (2, 3)	23 (19, 26)
Jincheng	Shanxi	North	Female	80 y～	3 (3, 4)	3 (3, 4)	1 (1, 1)	8 (6, 9)	1 (1, 1)	1 (1, 1)	0 (0, 0)	3 (2, 3)	1 (1, 1)	1 (1, 1)	0 (0, 0)	2 (1, 2)	1 (1, 1)	1 (1, 1)	0 (0, 0)	2 (2, 2)	0 (0, 0)	0 (0, 0)	0 (0, 0)	1 (0, 1)	3 (3, 4)	3 (3, 4)	1 (1, 1)	7 (6, 8)	10 (8, 11)	10 (8, 11)	3 (2, 3)	22 (18, 25)
Jincheng	Shanxi	North	Female	85 y～	4 (3, 5)	4 (3, 5)	1 (1, 1)	9 (7, 11)	2 (2, 2)	2 (2, 2)	1 (0, 1)	4 (4, 5)	1 (0, 1)	1 (0, 1)	0 (0, 0)	1 (1, 2)	2 (1, 2)	2 (1, 2)	1 (0, 1)	4 (3, 5)	0 (0, 0)	0 (0, 0)	0 (0, 0)	0 (0, 1)	3 (3, 4)	3 (3, 4)	1 (1, 1)	7 (6, 8)	11 (9, 13)	12 (10, 14)	3 (3, 4)	27 (22, 31)
Jinzhong	Shanxi	North	Male	0 y～	0 (0, 0)	0 (0, 0)	0 (0, 0)	0 (0, 0)	0 (0, 0)	0 (0, 0)	0 (0, 0)	0 (0, 0)	0 (0, 0)	0 (0, 0)	0 (0, 0)	0 (0, 0)	0 (0, 0)	0 (0, 0)	0 (0, 0)	0 (0, 0)	0 (0, 0)	0 (0, 0)	0 (0, 0)	0 (0, 0)	0 (0, 0)	0 (0, 0)	0 (0, 0)	0 (0, 0)	0 (0, 0)	0 (0, 0)	0 (0, 0)	0 (0, 0)
Jinzhong	Shanxi	North	Male	1 y～	0 (0, 0)	0 (0, 0)	0 (0, 0)	0 (0, 0)	0 (0, 0)	0 (0, 0)	0 (0, 0)	0 (0, 0)	0 (0, 0)	0 (0, 0)	0 (0, 0)	0 (0, 0)	0 (0, 0)	0 (0, 0)	0 (0, 0)	0 (0, 0)	0 (0, 0)	0 (0, 0)	0 (0, 0)	0 (0, 0)	0 (0, 0)	0 (0, 0)	0 (0, 0)	0 (0, 0)	0 (0, 0)	0 (0, 0)	0 (0, 0)	0 (0, 0)
Jinzhong	Shanxi	North	Male	5 y～	0 (0, 0)	0 (0, 0)	0 (0, 0)	0 (0, 0)	0 (0, 0)	0 (0, 0)	0 (0, 0)	0 (0, 0)	0 (0, 0)	0 (0, 0)	0 (0, 0)	0 (0, 0)	0 (0, 0)	0 (0, 0)	0 (0, 0)	0 (0, 0)	0 (0, 0)	0 (0, 0)	0 (0, 0)	0 (0, 0)	0 (0, 0)	0 (0, 0)	0 (0, 0)	0 (0, 0)	0 (0, 0)	0 (0, 0)	0 (0, 0)	0 (0, 0)
Jinzhong	Shanxi	North	Male	10 y～	0 (0, 0)	0 (0, 0)	0 (0, 0)	0 (0, 0)	0 (0, 0)	0 (0, 0)	0 (0, 0)	0 (0, 0)	0 (0, 0)	0 (0, 0)	0 (0, 0)	0 (0, 0)	0 (0, 0)	0 (0, 0)	0 (0, 0)	0 (0, 0)	0 (0, 0)	0 (0, 0)	0 (0, 0)	0 (0, 0)	0 (0, 0)	0 (0, 0)	0 (0, 0)	0 (0, 0)	0 (0, 0)	0 (0, 0)	0 (0, 0)	0 (0, 0)
Jinzhong	Shanxi	North	Male	15 y～	0 (0, 0)	0 (0, 0)	0 (0, 0)	0 (0, 0)	0 (0, 0)	0 (0, 0)	0 (0, 0)	0 (0, 0)	0 (0, 0)	0 (0, 0)	0 (0, 0)	0 (0, 0)	0 (0, 0)	0 (0, 0)	0 (0, 0)	0 (0, 0)	0 (0, 0)	0 (0, 0)	0 (0, 0)	0 (0, 0)	0 (0, 0)	0 (0, 0)	0 (0, 0)	0 (0, 0)	0 (0, 0)	0 (0, 0)	0 (0, 0)	1 (0, 1)
Jinzhong	Shanxi	North	Male	20 y～	0 (0, 0)	0 (0, 0)	0 (0, 0)	0 (0, 0)	0 (0, 0)	0 (0, 0)	0 (0, 0)	0 (0, 0)	0 (0, 0)	0 (0, 0)	0 (0, 0)	0 (0, 0)	0 (0, 0)	0 (0, 0)	0 (0, 0)	0 (0, 0)	0 (0, 0)	0 (0, 0)	0 (0, 0)	0 (0, 0)	0 (0, 0)	0 (0, 0)	0 (0, 0)	0 (0, 0)	0 (0, 0)	0 (0, 0)	0 (0, 0)	1 (1, 1)
Jinzhong	Shanxi	North	Male	25 y～	0 (0, 0)	0 (0, 0)	0 (0, 0)	0 (0, 0)	0 (0, 0)	0 (0, 0)	0 (0, 0)	0 (0, 0)	0 (0, 0)	0 (0, 0)	0 (0, 0)	0 (0, 0)	0 (0, 0)	0 (0, 0)	0 (0, 0)	0 (0, 0)	0 (0, 0)	0 (0, 0)	0 (0, 0)	0 (0, 0)	0 (0, 0)	0 (0, 0)	0 (0, 0)	0 (0, 0)	0 (0, 0)	0 (0, 0)	0 (0, 0)	1 (1, 1)
Jinzhong	Shanxi	North	Male	30 y～	0 (0, 1)	0 (0, 1)	0 (0, 0)	1 (1, 1)	0 (0, 0)	0 (0, 0)	0 (0, 0)	0 (0, 0)	0 (0, 0)	0 (0, 0)	0 (0, 0)	0 (0, 0)	0 (0, 0)	0 (0, 0)	0 (0, 0)	0 (0, 0)	0 (0, 0)	0 (0, 0)	0 (0, 0)	0 (0, 0)	0 (0, 0)	0 (0, 0)	0 (0, 0)	1 (1, 1)	1 (1, 1)	1 (1, 1)	0 (0, 0)	2 (2, 2)
Jinzhong	Shanxi	North	Male	35 y～	1 (1, 1)	1 (1, 1)	0 (0, 0)	2 (2, 3)	0 (0, 0)	0 (0, 0)	0 (0, 0)	0 (0, 0)	0 (0, 0)	0 (0, 0)	0 (0, 0)	0 (0, 1)	0 (0, 0)	0 (0, 0)	0 (0, 0)	0 (0, 0)	0 (0, 0)	0 (0, 0)	0 (0, 0)	0 (0, 0)	1 (1, 1)	1 (1, 1)	0 (0, 0)	2 (2, 2)	2 (2, 2)	2 (2, 2)	1 (1, 1)	5 (4, 6)
Jinzhong	Shanxi	North	Male	40 y～	2 (2, 2)	2 (2, 2)	1 (1, 1)	5 (4, 5)	0 (0, 0)	0 (0, 0)	0 (0, 0)	0 (0, 0)	0 (0, 0)	0 (0, 0)	0 (0, 0)	1 (1, 1)	0 (0, 0)	0 (0, 0)	0 (0, 0)	0 (0, 0)	0 (0, 0)	0 (0, 0)	0 (0, 0)	0 (0, 0)	2 (1, 2)	2 (1, 2)	1 (1, 1)	4 (3, 4)	4 (4, 5)	4 (3, 4)	2 (2, 2)	10 (8, 11)
Jinzhong	Shanxi	North	Male	45 y～	3 (2, 3)	2 (2, 2)	1 (1, 1)	6 (5, 6)	0 (0, 0)	0 (0, 0)	0 (0, 0)	0 (0, 0)	1 (0, 1)	0 (0, 1)	0 (0, 0)	1 (1, 2)	0 (0, 0)	0 (0, 0)	0 (0, 0)	0 (0, 0)	0 (0, 0)	0 (0, 0)	0 (0, 0)	0 (0, 0)	2 (2, 3)	2 (2, 2)	1 (1, 1)	6 (5, 6)	6 (5, 7)	5 (4, 6)	3 (2, 3)	14 (12, 15)
Jinzhong	Shanxi	North	Male	50 y～	3 (3, 3)	3 (2, 3)	1 (1, 2)	7 (6, 8)	0 (0, 0)	0 (0, 0)	0 (0, 0)	0 (0, 0)	1 (1, 1)	1 (1, 1)	1 (0, 1)	3 (2, 3)	0 (0, 0)	0 (0, 0)	0 (0, 0)	1 (0, 1)	0 (0, 0)	0 (0, 0)	0 (0, 0)	0 (0, 0)	3 (3, 3)	3 (2, 3)	1 (1, 2)	7 (6, 8)	8 (6, 9)	6 (5, 7)	4 (3, 4)	18 (15, 20)
Jinzhong	Shanxi	North	Male	55 y～	5 (4, 6)	4 (4, 5)	2 (2, 3)	12 (10, 13)	1 (0, 1)	0 (0, 1)	0 (0, 0)	1 (1, 1)	3 (2, 3)	2 (2, 3)	1 (1, 1)	6 (5, 8)	0 (0, 0)	0 (0, 0)	0 (0, 0)	1 (1, 1)	0 (0, 0)	0 (0, 0)	0 (0, 0)	1 (0, 1)	5 (4, 6)	4 (4, 5)	2 (2, 3)	12 (10, 14)	14 (12, 16)	12 (10, 14)	7 (6, 8)	33 (28, 37)
Jinzhong	Shanxi	North	Male	60 y～	4 (3, 4)	4 (3, 4)	2 (2, 2)	10 (8, 11)	1 (1, 1)	1 (1, 1)	0 (0, 0)	2 (2, 2)	3 (3, 4)	2 (2, 3)	1 (1, 2)	7 (5, 9)	0 (0, 1)	0 (0, 0)	0 (0, 0)	1 (1, 1)	0 (0, 0)	0 (0, 0)	0 (0, 0)	0 (0, 1)	5 (4, 5)	4 (4, 5)	2 (2, 2)	11 (10, 13)	14 (11, 16)	12 (10, 13)	6 (5, 7)	31 (26, 36)
Jinzhong	Shanxi	North	Male	65 y～	4 (3, 4)	4 (3, 4)	2 (2, 2)	10 (8, 11)	1 (1, 1)	1 (1, 1)	1 (0, 1)	3 (2, 3)	4 (3, 5)	3 (2, 3)	2 (1, 2)	8 (6, 10)	1 (1, 1)	0 (0, 1)	0 (0, 0)	1 (1, 2)	0 (0, 0)	0 (0, 0)	0 (0, 0)	1 (0, 1)	5 (4, 6)	5 (4, 5)	2 (2, 3)	12 (10, 14)	15 (12, 17)	13 (10, 14)	7 (5, 8)	34 (28, 40)
Jinzhong	Shanxi	North	Male	70 y～	5 (4, 6)	5 (4, 5)	2 (2, 3)	12 (9, 13)	2 (2, 3)	2 (1, 2)	1 (1, 1)	5 (4, 6)	4 (3, 5)	3 (2, 4)	2 (1, 2)	9 (7, 11)	1 (1, 1)	1 (1, 1)	0 (0, 1)	2 (2, 3)	0 (0, 0)	0 (0, 0)	0 (0, 0)	1 (1, 1)	7 (6, 7)	6 (5, 7)	3 (3, 3)	16 (14, 18)	20 (16, 23)	16 (13, 19)	9 (7, 10)	44 (36, 51)
Jinzhong	Shanxi	North	Male	75 y～	6 (5, 7)	5 (4, 6)	3 (2, 3)	14 (11, 16)	4 (3, 4)	3 (2, 3)	2 (1, 2)	8 (7, 9)	4 (3, 5)	3 (2, 4)	2 (1, 2)	9 (7, 11)	2 (1, 2)	1 (1, 1)	1 (1, 1)	3 (3, 4)	0 (0, 0)	0 (0, 0)	0 (0, 0)	1 (1, 1)	8 (7, 9)	7 (6, 8)	3 (3, 4)	18 (16, 20)	23 (19, 27)	19 (16, 22)	10 (8, 12)	53 (44, 62)
Jinzhong	Shanxi	North	Male	80 y～	4 (4, 5)	4 (3, 5)	2 (2, 2)	10 (8, 12)	3 (3, 4)	3 (3, 3)	1 (1, 2)	8 (6, 9)	2 (1, 2)	2 (1, 2)	1 (1, 1)	5 (4, 6)	2 (1, 2)	2 (1, 2)	1 (1, 1)	4 (3, 5)	0 (0, 0)	0 (0, 0)	0 (0, 0)	1 (1, 1)	5 (4, 6)	5 (4, 6)	2 (2, 3)	12 (11, 14)	17 (14, 19)	16 (13, 18)	7 (6, 8)	40 (33, 46)
Jinzhong	Shanxi	North	Male	85 y～	4 (3, 5)	4 (3, 4)	2 (1, 2)	10 (8, 11)	3 (3, 4)	3 (3, 4)	1 (1, 2)	8 (7, 9)	1 (1, 1)	1 (1, 1)	1 (0, 1)	3 (2, 3)	2 (2, 3)	2 (2, 3)	1 (1, 1)	6 (5, 7)	0 (0, 0)	0 (0, 0)	0 (0, 0)	0 (0, 1)	4 (3, 4)	3 (3, 4)	2 (1, 2)	8 (7, 10)	15 (12, 17)	14 (12, 16)	6 (5, 8)	35 (29, 41)
Jinzhong	Shanxi	North	Female	0 y～	0 (0, 0)	0 (0, 0)	0 (0, 0)	0 (0, 0)	0 (0, 0)	0 (0, 0)	0 (0, 0)	0 (0, 0)	0 (0, 0)	0 (0, 0)	0 (0, 0)	0 (0, 0)	0 (0, 0)	0 (0, 0)	0 (0, 0)	0 (0, 0)	0 (0, 0)	0 (0, 0)	0 (0, 0)	0 (0, 0)	0 (0, 0)	0 (0, 0)	0 (0, 0)	0 (0, 0)	0 (0, 0)	0 (0, 0)	0 (0, 0)	0 (0, 0)
Jinzhong	Shanxi	North	Female	1 y～	0 (0, 0)	0 (0, 0)	0 (0, 0)	0 (0, 0)	0 (0, 0)	0 (0, 0)	0 (0, 0)	0 (0, 0)	0 (0, 0)	0 (0, 0)	0 (0, 0)	0 (0, 0)	0 (0, 0)	0 (0, 0)	0 (0, 0)	0 (0, 0)	0 (0, 0)	0 (0, 0)	0 (0, 0)	0 (0, 0)	0 (0, 0)	0 (0, 0)	0 (0, 0)	0 (0, 0)	0 (0, 0)	0 (0, 0)	0 (0, 0)	0 (0, 0)
Jinzhong	Shanxi	North	Female	5 y～	0 (0, 0)	0 (0, 0)	0 (0, 0)	0 (0, 0)	0 (0, 0)	0 (0, 0)	0 (0, 0)	0 (0, 0)	0 (0, 0)	0 (0, 0)	0 (0, 0)	0 (0, 0)	0 (0, 0)	0 (0, 0)	0 (0, 0)	0 (0, 0)	0 (0, 0)	0 (0, 0)	0 (0, 0)	0 (0, 0)	0 (0, 0)	0 (0, 0)	0 (0, 0)	0 (0, 0)	0 (0, 0)	0 (0, 0)	0 (0, 0)	0 (0, 0)
Jinzhong	Shanxi	North	Female	10 y～	0 (0, 0)	0 (0, 0)	0 (0, 0)	0 (0, 0)	0 (0, 0)	0 (0, 0)	0 (0, 0)	0 (0, 0)	0 (0, 0)	0 (0, 0)	0 (0, 0)	0 (0, 0)	0 (0, 0)	0 (0, 0)	0 (0, 0)	0 (0, 0)	0 (0, 0)	0 (0, 0)	0 (0, 0)	0 (0, 0)	0 (0, 0)	0 (0, 0)	0 (0, 0)	0 (0, 0)	0 (0, 0)	0 (0, 0)	0 (0, 0)	0 (0, 0)
Jinzhong	Shanxi	North	Female	15 y～	0 (0, 0)	0 (0, 0)	0 (0, 0)	0 (0, 0)	0 (0, 0)	0 (0, 0)	0 (0, 0)	0 (0, 0)	0 (0, 0)	0 (0, 0)	0 (0, 0)	0 (0, 0)	0 (0, 0)	0 (0, 0)	0 (0, 0)	0 (0, 0)	0 (0, 0)	0 (0, 0)	0 (0, 0)	0 (0, 0)	0 (0, 0)	0 (0, 0)	0 (0, 0)	0 (0, 0)	0 (0, 0)	0 (0, 0)	0 (0, 0)	0 (0, 0)
Jinzhong	Shanxi	North	Female	20 y～	0 (0, 0)	0 (0, 0)	0 (0, 0)	0 (0, 0)	0 (0, 0)	0 (0, 0)	0 (0, 0)	0 (0, 0)	0 (0, 0)	0 (0, 0)	0 (0, 0)	0 (0, 0)	0 (0, 0)	0 (0, 0)	0 (0, 0)	0 (0, 0)	0 (0, 0)	0 (0, 0)	0 (0, 0)	0 (0, 0)	0 (0, 0)	0 (0, 0)	0 (0, 0)	0 (0, 0)	0 (0, 0)	0 (0, 0)	0 (0, 0)	0 (0, 0)
Jinzhong	Shanxi	North	Female	25 y～	0 (0, 0)	0 (0, 0)	0 (0, 0)	0 (0, 0)	0 (0, 0)	0 (0, 0)	0 (0, 0)	0 (0, 0)	0 (0, 0)	0 (0, 0)	0 (0, 0)	0 (0, 0)	0 (0, 0)	0 (0, 0)	0 (0, 0)	0 (0, 0)	0 (0, 0)	0 (0, 0)	0 (0, 0)	0 (0, 0)	0 (0, 0)	0 (0, 0)	0 (0, 0)	0 (0, 0)	0 (0, 0)	0 (0, 0)	0 (0, 0)	0 (0, 0)
Jinzhong	Shanxi	North	Female	30 y～	0 (0, 0)	0 (0, 0)	0 (0, 0)	0 (0, 0)	0 (0, 0)	0 (0, 0)	0 (0, 0)	0 (0, 0)	0 (0, 0)	0 (0, 0)	0 (0, 0)	0 (0, 0)	0 (0, 0)	0 (0, 0)	0 (0, 0)	0 (0, 0)	0 (0, 0)	0 (0, 0)	0 (0, 0)	0 (0, 0)	0 (0, 0)	0 (0, 0)	0 (0, 0)	0 (0, 0)	0 (0, 0)	0 (0, 0)	0 (0, 0)	1 (1, 1)
Jinzhong	Shanxi	North	Female	35 y～	0 (0, 0)	0 (0, 0)	0 (0, 0)	1 (1, 1)	0 (0, 0)	0 (0, 0)	0 (0, 0)	0 (0, 0)	0 (0, 0)	0 (0, 0)	0 (0, 0)	0 (0, 0)	0 (0, 0)	0 (0, 0)	0 (0, 0)	0 (0, 0)	0 (0, 0)	0 (0, 0)	0 (0, 0)	0 (0, 0)	0 (0, 0)	0 (0, 0)	0 (0, 0)	0 (0, 0)	1 (0, 1)	1 (1, 1)	0 (0, 0)	1 (1, 2)
Jinzhong	Shanxi	North	Female	40 y～	0 (0, 0)	0 (0, 1)	0 (0, 0)	1 (1, 1)	0 (0, 0)	0 (0, 0)	0 (0, 0)	0 (0, 0)	0 (0, 0)	0 (0, 0)	0 (0, 0)	0 (0, 0)	0 (0, 0)	0 (0, 0)	0 (0, 0)	0 (0, 0)	0 (0, 0)	0 (0, 0)	0 (0, 0)	0 (0, 0)	0 (0, 0)	1 (0, 1)	0 (0, 0)	1 (1, 1)	1 (1, 1)	1 (1, 1)	0 (0, 0)	3 (2, 3)
Jinzhong	Shanxi	North	Female	45 y～	1 (0, 1)	1 (1, 1)	0 (0, 0)	1 (1, 2)	0 (0, 0)	0 (0, 0)	0 (0, 0)	0 (0, 0)	0 (0, 0)	0 (0, 1)	0 (0, 0)	1 (1, 1)	0 (0, 0)	0 (0, 0)	0 (0, 0)	0 (0, 0)	0 (0, 0)	0 (0, 0)	0 (0, 0)	0 (0, 0)	1 (1, 1)	1 (1, 1)	0 (0, 0)	2 (1, 2)	2 (1, 2)	2 (2, 2)	0 (0, 1)	4 (4, 5)
Jinzhong	Shanxi	North	Female	50 y～	1 (1, 1)	1 (1, 1)	0 (0, 0)	2 (2, 2)	0 (0, 0)	0 (0, 0)	0 (0, 0)	0 (0, 0)	0 (0, 0)	1 (0, 1)	0 (0, 0)	1 (1, 1)	0 (0, 0)	0 (0, 0)	0 (0, 0)	0 (0, 0)	0 (0, 0)	0 (0, 0)	0 (0, 0)	0 (0, 0)	1 (1, 1)	1 (1, 1)	0 (0, 0)	2 (2, 3)	2 (2, 2)	3 (2, 3)	1 (1, 1)	6 (5, 7)
Jinzhong	Shanxi	North	Female	55 y～	1 (1, 1)	2 (1, 2)	0 (0, 0)	3 (3, 4)	0 (0, 0)	0 (0, 0)	0 (0, 0)	0 (0, 0)	1 (1, 1)	1 (1, 1)	0 (0, 0)	2 (2, 3)	0 (0, 0)	0 (0, 0)	0 (0, 0)	0 (0, 1)	0 (0, 0)	0 (0, 0)	0 (0, 0)	0 (0, 0)	1 (1, 1)	2 (1, 2)	0 (0, 0)	3 (3, 4)	4 (3, 4)	5 (4, 6)	1 (1, 1)	10 (8, 11)
Jinzhong	Shanxi	North	Female	60 y～	1 (1, 2)	2 (2, 2)	0 (0, 0)	4 (3, 4)	0 (0, 0)	0 (0, 0)	0 (0, 0)	1 (0, 1)	1 (1, 1)	1 (1, 1)	0 (0, 0)	2 (2, 3)	0 (0, 0)	0 (0, 0)	0 (0, 0)	0 (0, 1)	0 (0, 0)	0 (0, 0)	0 (0, 0)	0 (0, 0)	2 (1, 2)	2 (2, 2)	0 (0, 1)	4 (4, 5)	4 (4, 5)	6 (5, 7)	1 (1, 1)	11 (9, 13)
Jinzhong	Shanxi	North	Female	65 y～	2 (2, 2)	3 (2, 3)	1 (0, 1)	5 (4, 6)	0 (0, 0)	0 (0, 1)	0 (0, 0)	1 (1, 1)	1 (1, 1)	1 (1, 2)	0 (0, 0)	3 (2, 3)	0 (0, 0)	0 (0, 0)	0 (0, 0)	1 (1, 1)	0 (0, 0)	0 (0, 0)	0 (0, 0)	0 (0, 0)	2 (2, 2)	3 (2, 3)	1 (1, 1)	6 (5, 6)	6 (5, 7)	8 (7, 9)	2 (1, 2)	15 (13, 17)
Jinzhong	Shanxi	North	Female	70 y～	3 (2, 3)	4 (3, 4)	1 (1, 1)	8 (6, 9)	1 (1, 1)	1 (1, 1)	0 (0, 0)	2 (2, 2)	1 (1, 1)	2 (1, 2)	0 (0, 0)	3 (2, 4)	0 (0, 0)	1 (0, 1)	0 (0, 0)	1 (1, 1)	0 (0, 0)	0 (0, 0)	0 (0, 0)	1 (1, 1)	3 (3, 4)	4 (4, 5)	1 (1, 1)	9 (7, 10)	9 (7, 10)	12 (10, 13)	3 (2, 3)	23 (19, 26)
Jinzhong	Shanxi	North	Female	75 y～	4 (4, 5)	6 (5, 7)	1 (1, 1)	12 (9, 13)	1 (1, 1)	2 (2, 2)	0 (0, 0)	3 (3, 4)	1 (1, 2)	2 (2, 3)	0 (0, 1)	4 (3, 5)	1 (1, 1)	1 (1, 2)	0 (0, 0)	2 (2, 3)	0 (0, 0)	1 (0, 1)	0 (0, 0)	1 (1, 1)	5 (4, 6)	7 (6, 7)	1 (1, 2)	13 (11, 15)	13 (11, 15)	18 (15, 21)	4 (3, 4)	35 (29, 41)
Jinzhong	Shanxi	North	Female	80 y～	5 (4, 5)	6 (5, 7)	1 (1, 2)	12 (9, 13)	2 (1, 2)	2 (2, 2)	1 (0, 1)	4 (4, 5)	1 (1, 1)	1 (1, 2)	0 (0, 0)	3 (2, 3)	1 (1, 1)	2 (1, 2)	0 (0, 0)	3 (2, 4)	0 (0, 0)	0 (0, 0)	0 (0, 0)	1 (1, 1)	4 (4, 5)	6 (5, 6)	1 (1, 2)	11 (10, 13)	13 (11, 15)	17 (14, 20)	4 (3, 5)	34 (28, 40)
Jinzhong	Shanxi	North	Female	85 y～	6 (4, 6)	7 (6, 8)	2 (1, 2)	14 (12, 17)	3 (2, 3)	3 (3, 4)	1 (1, 1)	7 (6, 8)	1 (1, 1)	1 (1, 1)	0 (0, 0)	2 (2, 2)	2 (2, 3)	3 (2, 4)	1 (1, 1)	6 (5, 8)	0 (0, 0)	0 (0, 0)	0 (0, 0)	1 (1, 1)	4 (4, 5)	6 (5, 6)	1 (1, 1)	11 (10, 13)	16 (13, 18)	20 (17, 24)	5 (4, 6)	41 (34, 48)
Linfen	Shanxi	North	Male	0 y～	0 (0, 0)	0 (0, 0)	0 (0, 0)	0 (0, 0)	0 (0, 0)	0 (0, 0)	0 (0, 0)	0 (0, 0)	0 (0, 0)	0 (0, 0)	0 (0, 0)	0 (0, 0)	0 (0, 0)	0 (0, 0)	0 (0, 0)	0 (0, 1)	0 (0, 0)	0 (0, 0)	0 (0, 0)	0 (0, 0)	0 (0, 0)	0 (0, 0)	0 (0, 0)	0 (0, 0)	0 (0, 0)	0 (0, 0)	0 (0, 0)	0 (0, 1)
Linfen	Shanxi	North	Male	1 y～	0 (0, 0)	0 (0, 0)	0 (0, 0)	0 (0, 0)	0 (0, 0)	0 (0, 0)	0 (0, 0)	0 (0, 0)	0 (0, 0)	0 (0, 0)	0 (0, 0)	0 (0, 0)	0 (0, 0)	0 (0, 0)	0 (0, 0)	0 (0, 0)	0 (0, 0)	0 (0, 0)	0 (0, 0)	0 (0, 0)	0 (0, 0)	0 (0, 0)	0 (0, 0)	0 (0, 0)	0 (0, 0)	0 (0, 0)	0 (0, 0)	0 (0, 0)
Linfen	Shanxi	North	Male	5 y～	0 (0, 0)	0 (0, 0)	0 (0, 0)	0 (0, 0)	0 (0, 0)	0 (0, 0)	0 (0, 0)	0 (0, 0)	0 (0, 0)	0 (0, 0)	0 (0, 0)	0 (0, 0)	0 (0, 0)	0 (0, 0)	0 (0, 0)	0 (0, 0)	0 (0, 0)	0 (0, 0)	0 (0, 0)	0 (0, 0)	0 (0, 0)	0 (0, 0)	0 (0, 0)	0 (0, 0)	0 (0, 0)	0 (0, 0)	0 (0, 0)	0 (0, 0)
Linfen	Shanxi	North	Male	10 y～	0 (0, 0)	0 (0, 0)	0 (0, 0)	0 (0, 0)	0 (0, 0)	0 (0, 0)	0 (0, 0)	0 (0, 0)	0 (0, 0)	0 (0, 0)	0 (0, 0)	0 (0, 0)	0 (0, 0)	0 (0, 0)	0 (0, 0)	0 (0, 0)	0 (0, 0)	0 (0, 0)	0 (0, 0)	0 (0, 0)	0 (0, 0)	0 (0, 0)	0 (0, 0)	0 (0, 0)	0 (0, 0)	0 (0, 0)	0 (0, 0)	0 (0, 0)
Linfen	Shanxi	North	Male	15 y～	0 (0, 0)	0 (0, 0)	0 (0, 0)	0 (0, 0)	0 (0, 0)	0 (0, 0)	0 (0, 0)	0 (0, 0)	0 (0, 0)	0 (0, 0)	0 (0, 0)	0 (0, 0)	0 (0, 0)	0 (0, 0)	0 (0, 0)	0 (0, 0)	0 (0, 0)	0 (0, 0)	0 (0, 0)	0 (0, 0)	0 (0, 0)	0 (0, 0)	0 (0, 0)	0 (0, 0)	0 (0, 0)	0 (0, 0)	0 (0, 0)	1 (1, 1)
Linfen	Shanxi	North	Male	20 y～	0 (0, 0)	0 (0, 0)	0 (0, 0)	0 (0, 1)	0 (0, 0)	0 (0, 0)	0 (0, 0)	0 (0, 0)	0 (0, 0)	0 (0, 0)	0 (0, 0)	0 (0, 0)	0 (0, 0)	0 (0, 0)	0 (0, 0)	0 (0, 0)	0 (0, 0)	0 (0, 0)	0 (0, 0)	0 (0, 0)	0 (0, 0)	0 (0, 0)	0 (0, 0)	0 (0, 0)	0 (0, 1)	0 (0, 0)	0 (0, 0)	1 (1, 1)
Linfen	Shanxi	North	Male	25 y～	0 (0, 0)	0 (0, 0)	0 (0, 0)	0 (0, 1)	0 (0, 0)	0 (0, 0)	0 (0, 0)	0 (0, 0)	0 (0, 0)	0 (0, 0)	0 (0, 0)	0 (0, 0)	0 (0, 0)	0 (0, 0)	0 (0, 0)	0 (0, 0)	0 (0, 0)	0 (0, 0)	0 (0, 0)	0 (0, 0)	0 (0, 0)	0 (0, 0)	0 (0, 0)	0 (0, 0)	1 (0, 1)	0 (0, 0)	0 (0, 0)	1 (1, 1)
Linfen	Shanxi	North	Male	30 y～	1 (1, 1)	1 (0, 1)	0 (0, 0)	1 (1, 2)	0 (0, 0)	0 (0, 0)	0 (0, 0)	0 (0, 0)	0 (0, 0)	0 (0, 0)	0 (0, 0)	0 (0, 0)	0 (0, 0)	0 (0, 0)	0 (0, 0)	0 (0, 0)	0 (0, 0)	0 (0, 0)	0 (0, 0)	0 (0, 0)	1 (0, 1)	0 (0, 0)	0 (0, 0)	1 (1, 1)	1 (1, 2)	1 (1, 1)	0 (0, 0)	3 (3, 3)
Linfen	Shanxi	North	Male	35 y～	2 (1, 2)	1 (1, 1)	0 (0, 1)	3 (3, 4)	0 (0, 0)	0 (0, 0)	0 (0, 0)	0 (0, 0)	0 (0, 0)	0 (0, 0)	0 (0, 0)	1 (0, 1)	0 (0, 0)	0 (0, 0)	0 (0, 0)	0 (0, 0)	0 (0, 0)	0 (0, 0)	0 (0, 0)	0 (0, 0)	1 (1, 1)	1 (1, 1)	0 (0, 0)	2 (2, 3)	3 (3, 4)	2 (2, 3)	1 (1, 1)	7 (6, 7)
Linfen	Shanxi	North	Male	40 y～	3 (3, 3)	2 (2, 2)	1 (1, 1)	6 (6, 7)	0 (0, 0)	0 (0, 0)	0 (0, 0)	0 (0, 0)	0 (0, 1)	0 (0, 0)	0 (0, 0)	1 (1, 1)	0 (0, 0)	0 (0, 0)	0 (0, 0)	1 (0, 1)	0 (0, 0)	0 (0, 0)	0 (0, 0)	0 (0, 0)	2 (2, 3)	2 (2, 2)	1 (1, 1)	5 (4, 6)	7 (6, 7)	5 (4, 5)	2 (2, 2)	13 (11, 15)
Linfen	Shanxi	North	Male	45 y～	4 (3, 4)	3 (2, 3)	1 (1, 1)	8 (7, 9)	0 (0, 0)	0 (0, 0)	0 (0, 0)	0 (0, 0)	1 (1, 1)	1 (0, 1)	0 (0, 0)	2 (1, 2)	0 (0, 0)	0 (0, 0)	0 (0, 0)	0 (0, 1)	0 (0, 0)	0 (0, 0)	0 (0, 0)	0 (0, 0)	4 (3, 4)	2 (2, 3)	1 (1, 1)	8 (7, 8)	9 (8, 10)	6 (5, 6)	3 (3, 3)	18 (16, 20)
Linfen	Shanxi	North	Male	50 y～	5 (4, 5)	3 (3, 3)	2 (1, 2)	9 (8, 10)	0 (0, 0)	0 (0, 0)	0 (0, 0)	1 (0, 1)	2 (1, 2)	1 (1, 1)	1 (0, 1)	3 (3, 4)	0 (0, 0)	0 (0, 0)	0 (0, 0)	1 (1, 1)	0 (0, 0)	0 (0, 0)	0 (0, 0)	0 (0, 0)	5 (4, 5)	3 (3, 3)	2 (1, 2)	9 (8, 10)	12 (10, 14)	8 (6, 8)	4 (3, 4)	24 (20, 26)
Linfen	Shanxi	North	Male	55 y～	8 (7, 9)	5 (4, 6)	3 (2, 3)	16 (14, 17)	1 (1, 1)	1 (0, 1)	0 (0, 0)	2 (1, 2)	4 (3, 5)	2 (2, 3)	1 (1, 2)	8 (6, 10)	1 (0, 1)	0 (0, 0)	0 (0, 0)	1 (1, 1)	0 (0, 0)	0 (0, 0)	0 (0, 0)	1 (1, 1)	8 (7, 9)	5 (5, 6)	3 (2, 3)	16 (14, 18)	23 (19, 26)	14 (12, 16)	7 (6, 8)	44 (37, 50)
Linfen	Shanxi	North	Male	60 y～	6 (6, 7)	4 (4, 5)	2 (2, 2)	13 (11, 14)	1 (1, 2)	1 (1, 1)	0 (0, 0)	3 (2, 3)	5 (4, 6)	3 (2, 4)	1 (1, 2)	10 (7, 12)	1 (1, 1)	0 (0, 1)	0 (0, 0)	1 (1, 2)	0 (0, 0)	0 (0, 0)	0 (0, 0)	1 (1, 1)	8 (7, 9)	5 (5, 6)	2 (2, 3)	15 (13, 17)	22 (18, 25)	14 (12, 16)	7 (5, 7)	42 (36, 48)
Linfen	Shanxi	North	Male	65 y～	6 (6, 7)	4 (4, 5)	2 (2, 2)	13 (11, 14)	2 (2, 2)	1 (1, 1)	1 (0, 1)	4 (3, 4)	6 (4, 7)	3 (2, 4)	2 (1, 2)	11 (8, 13)	1 (1, 1)	1 (0, 1)	0 (0, 0)	2 (2, 2)	0 (0, 0)	0 (0, 0)	0 (0, 0)	1 (1, 1)	8 (7, 9)	6 (5, 6)	3 (2, 3)	16 (14, 19)	24 (20, 27)	15 (13, 17)	7 (6, 8)	46 (39, 53)
Linfen	Shanxi	North	Male	70 y～	8 (6, 9)	5 (4, 6)	2 (2, 3)	16 (13, 18)	4 (3, 4)	2 (2, 2)	1 (1, 1)	7 (6, 8)	7 (5, 8)	4 (3, 4)	2 (1, 2)	12 (9, 15)	2 (1, 2)	1 (1, 1)	0 (0, 1)	3 (2, 4)	1 (0, 1)	0 (0, 0)	0 (0, 0)	1 (1, 1)	11 (9, 12)	7 (6, 8)	3 (3, 4)	21 (19, 24)	31 (26, 36)	20 (16, 23)	9 (8, 11)	60 (50, 69)
Linfen	Shanxi	North	Male	75 y～	9 (8, 10)	6 (5, 7)	3 (2, 3)	19 (15, 21)	6 (5, 7)	3 (3, 4)	2 (1, 2)	11 (9, 13)	6 (5, 8)	4 (3, 4)	2 (1, 2)	12 (9, 14)	3 (2, 3)	1 (1, 2)	1 (1, 1)	5 (4, 6)	1 (1, 1)	0 (0, 0)	0 (0, 0)	1 (1, 1)	12 (11, 14)	9 (7, 9)	4 (3, 4)	25 (21, 28)	37 (31, 43)	24 (20, 27)	11 (9, 13)	72 (60, 83)
Linfen	Shanxi	North	Male	80 y～	7 (6, 8)	5 (4, 6)	2 (2, 2)	14 (11, 16)	5 (4, 6)	4 (3, 4)	2 (1, 2)	10 (9, 12)	3 (2, 4)	2 (2, 3)	1 (1, 1)	6 (5, 8)	3 (2, 3)	2 (1, 2)	1 (1, 1)	5 (4, 7)	0 (0, 0)	0 (0, 0)	0 (0, 0)	1 (1, 1)	8 (7, 9)	6 (5, 7)	3 (2, 3)	17 (14, 19)	27 (22, 31)	19 (16, 22)	8 (7, 9)	54 (44, 62)
Linfen	Shanxi	North	Male	85 y～	6 (5, 7)	5 (4, 5)	2 (2, 2)	13 (10, 15)	5 (5, 6)	4 (3, 4)	2 (1, 2)	11 (9, 12)	2 (1, 2)	1 (1, 2)	1 (0, 1)	4 (3, 5)	4 (3, 5)	3 (2, 3)	1 (1, 2)	8 (7, 10)	0 (0, 0)	0 (0, 0)	0 (0, 0)	1 (1, 1)	6 (5, 6)	4 (3, 5)	2 (1, 2)	12 (10, 13)	24 (19, 27)	17 (14, 19)	7 (6, 8)	47 (39, 55)
Linfen	Shanxi	North	Female	0 y～	0 (0, 0)	0 (0, 0)	0 (0, 0)	0 (0, 0)	0 (0, 0)	0 (0, 0)	0 (0, 0)	0 (0, 0)	0 (0, 0)	0 (0, 0)	0 (0, 0)	0 (0, 0)	0 (0, 0)	0 (0, 0)	0 (0, 0)	0 (0, 0)	0 (0, 0)	0 (0, 0)	0 (0, 0)	0 (0, 0)	0 (0, 0)	0 (0, 0)	0 (0, 0)	0 (0, 0)	0 (0, 0)	0 (0, 0)	0 (0, 0)	0 (0, 0)
Linfen	Shanxi	North	Female	1 y～	0 (0, 0)	0 (0, 0)	0 (0, 0)	0 (0, 0)	0 (0, 0)	0 (0, 0)	0 (0, 0)	0 (0, 0)	0 (0, 0)	0 (0, 0)	0 (0, 0)	0 (0, 0)	0 (0, 0)	0 (0, 0)	0 (0, 0)	0 (0, 0)	0 (0, 0)	0 (0, 0)	0 (0, 0)	0 (0, 0)	0 (0, 0)	0 (0, 0)	0 (0, 0)	0 (0, 0)	0 (0, 0)	0 (0, 0)	0 (0, 0)	0 (0, 0)
Linfen	Shanxi	North	Female	5 y～	0 (0, 0)	0 (0, 0)	0 (0, 0)	0 (0, 0)	0 (0, 0)	0 (0, 0)	0 (0, 0)	0 (0, 0)	0 (0, 0)	0 (0, 0)	0 (0, 0)	0 (0, 0)	0 (0, 0)	0 (0, 0)	0 (0, 0)	0 (0, 0)	0 (0, 0)	0 (0, 0)	0 (0, 0)	0 (0, 0)	0 (0, 0)	0 (0, 0)	0 (0, 0)	0 (0, 0)	0 (0, 0)	0 (0, 0)	0 (0, 0)	0 (0, 0)
Linfen	Shanxi	North	Female	10 y～	0 (0, 0)	0 (0, 0)	0 (0, 0)	0 (0, 0)	0 (0, 0)	0 (0, 0)	0 (0, 0)	0 (0, 0)	0 (0, 0)	0 (0, 0)	0 (0, 0)	0 (0, 0)	0 (0, 0)	0 (0, 0)	0 (0, 0)	0 (0, 0)	0 (0, 0)	0 (0, 0)	0 (0, 0)	0 (0, 0)	0 (0, 0)	0 (0, 0)	0 (0, 0)	0 (0, 0)	0 (0, 0)	0 (0, 0)	0 (0, 0)	0 (0, 0)
Linfen	Shanxi	North	Female	15 y～	0 (0, 0)	0 (0, 0)	0 (0, 0)	0 (0, 0)	0 (0, 0)	0 (0, 0)	0 (0, 0)	0 (0, 0)	0 (0, 0)	0 (0, 0)	0 (0, 0)	0 (0, 0)	0 (0, 0)	0 (0, 0)	0 (0, 0)	0 (0, 0)	0 (0, 0)	0 (0, 0)	0 (0, 0)	0 (0, 0)	0 (0, 0)	0 (0, 0)	0 (0, 0)	0 (0, 0)	0 (0, 0)	0 (0, 0)	0 (0, 0)	0 (0, 0)
Linfen	Shanxi	North	Female	20 y～	0 (0, 0)	0 (0, 0)	0 (0, 0)	0 (0, 0)	0 (0, 0)	0 (0, 0)	0 (0, 0)	0 (0, 0)	0 (0, 0)	0 (0, 0)	0 (0, 0)	0 (0, 0)	0 (0, 0)	0 (0, 0)	0 (0, 0)	0 (0, 0)	0 (0, 0)	0 (0, 0)	0 (0, 0)	0 (0, 0)	0 (0, 0)	0 (0, 0)	0 (0, 0)	0 (0, 0)	0 (0, 0)	0 (0, 0)	0 (0, 0)	0 (0, 0)
Linfen	Shanxi	North	Female	25 y～	0 (0, 0)	0 (0, 0)	0 (0, 0)	0 (0, 0)	0 (0, 0)	0 (0, 0)	0 (0, 0)	0 (0, 0)	0 (0, 0)	0 (0, 0)	0 (0, 0)	0 (0, 0)	0 (0, 0)	0 (0, 0)	0 (0, 0)	0 (0, 0)	0 (0, 0)	0 (0, 0)	0 (0, 0)	0 (0, 0)	0 (0, 0)	0 (0, 0)	0 (0, 0)	0 (0, 0)	0 (0, 0)	0 (0, 0)	0 (0, 0)	0 (0, 0)
Linfen	Shanxi	North	Female	30 y～	0 (0, 0)	0 (0, 0)	0 (0, 0)	0 (0, 0)	0 (0, 0)	0 (0, 0)	0 (0, 0)	0 (0, 0)	0 (0, 0)	0 (0, 0)	0 (0, 0)	0 (0, 0)	0 (0, 0)	0 (0, 0)	0 (0, 0)	0 (0, 0)	0 (0, 0)	0 (0, 0)	0 (0, 0)	0 (0, 0)	0 (0, 0)	0 (0, 0)	0 (0, 0)	0 (0, 0)	0 (0, 0)	0 (0, 0)	0 (0, 0)	1 (1, 1)
Linfen	Shanxi	North	Female	35 y～	0 (0, 0)	0 (0, 0)	0 (0, 0)	1 (1, 1)	0 (0, 0)	0 (0, 0)	0 (0, 0)	0 (0, 0)	0 (0, 0)	0 (0, 0)	0 (0, 0)	0 (0, 0)	0 (0, 0)	0 (0, 0)	0 (0, 0)	0 (0, 0)	0 (0, 0)	0 (0, 0)	0 (0, 0)	0 (0, 0)	0 (0, 0)	0 (0, 0)	0 (0, 0)	0 (0, 0)	1 (1, 1)	1 (1, 1)	0 (0, 0)	2 (2, 2)
Linfen	Shanxi	North	Female	40 y～	1 (1, 1)	1 (0, 1)	0 (0, 0)	1 (1, 1)	0 (0, 0)	0 (0, 0)	0 (0, 0)	0 (0, 0)	0 (0, 0)	0 (0, 0)	0 (0, 0)	0 (0, 1)	0 (0, 0)	0 (0, 0)	0 (0, 0)	0 (0, 0)	0 (0, 0)	0 (0, 0)	0 (0, 0)	0 (0, 0)	1 (1, 1)	1 (1, 1)	0 (0, 0)	1 (1, 2)	2 (1, 2)	2 (1, 2)	0 (0, 0)	3 (3, 4)
Linfen	Shanxi	North	Female	45 y～	1 (1, 1)	1 (1, 1)	0 (0, 0)	2 (2, 2)	0 (0, 0)	0 (0, 0)	0 (0, 0)	0 (0, 0)	0 (0, 1)	1 (0, 1)	0 (0, 0)	1 (1, 1)	0 (0, 0)	0 (0, 0)	0 (0, 0)	0 (0, 0)	0 (0, 0)	0 (0, 0)	0 (0, 0)	0 (0, 0)	1 (1, 1)	1 (1, 1)	0 (0, 0)	2 (2, 2)	3 (2, 3)	3 (2, 3)	1 (0, 1)	6 (5, 6)
Linfen	Shanxi	North	Female	50 y～	1 (1, 1)	1 (1, 1)	0 (0, 0)	3 (2, 3)	0 (0, 0)	0 (0, 0)	0 (0, 0)	0 (0, 0)	1 (0, 1)	1 (1, 1)	0 (0, 0)	1 (1, 2)	0 (0, 0)	0 (0, 0)	0 (0, 0)	0 (0, 0)	0 (0, 0)	0 (0, 0)	0 (0, 0)	0 (0, 0)	1 (1, 2)	1 (1, 2)	0 (0, 0)	3 (3, 3)	3 (3, 4)	3 (3, 4)	1 (1, 1)	8 (6, 9)
Linfen	Shanxi	North	Female	55 y～	2 (2, 2)	2 (2, 2)	0 (0, 0)	5 (4, 5)	0 (0, 0)	0 (0, 0)	0 (0, 0)	1 (0, 1)	1 (1, 1)	1 (1, 2)	0 (0, 0)	3 (2, 3)	0 (0, 0)	0 (0, 0)	0 (0, 0)	1 (0, 1)	0 (0, 0)	0 (0, 0)	0 (0, 0)	0 (0, 0)	2 (2, 2)	2 (2, 2)	0 (0, 0)	4 (4, 5)	6 (5, 7)	6 (5, 7)	1 (1, 1)	13 (11, 15)
Linfen	Shanxi	North	Female	60 y～	2 (2, 3)	2 (2, 2)	0 (0, 0)	5 (4, 5)	0 (0, 0)	0 (0, 0)	0 (0, 0)	1 (1, 1)	1 (1, 1)	1 (1, 2)	0 (0, 0)	3 (2, 3)	0 (0, 0)	0 (0, 0)	0 (0, 0)	1 (0, 1)	0 (0, 0)	0 (0, 0)	0 (0, 0)	0 (0, 0)	3 (2, 3)	2 (2, 3)	0 (0, 1)	6 (5, 6)	7 (6, 8)	7 (6, 8)	1 (1, 1)	15 (13, 17)
Linfen	Shanxi	North	Female	65 y～	3 (3, 3)	3 (3, 3)	1 (1, 1)	7 (6, 7)	1 (0, 1)	1 (1, 1)	0 (0, 0)	1 (1, 1)	1 (1, 2)	2 (1, 2)	0 (0, 0)	3 (3, 4)	0 (0, 1)	0 (0, 1)	0 (0, 0)	1 (1, 1)	0 (0, 0)	0 (0, 0)	0 (0, 0)	1 (0, 1)	3 (3, 4)	3 (3, 4)	1 (1, 1)	7 (6, 8)	9 (8, 11)	9 (8, 11)	2 (2, 2)	20 (17, 23)
Linfen	Shanxi	North	Female	70 y～	5 (4, 6)	5 (4, 5)	1 (1, 1)	11 (9, 12)	1 (1, 1)	1 (1, 1)	0 (0, 0)	2 (2, 3)	2 (1, 2)	2 (1, 2)	0 (0, 0)	4 (3, 5)	1 (1, 1)	1 (1, 1)	0 (0, 0)	2 (1, 2)	0 (0, 0)	0 (0, 0)	0 (0, 0)	1 (1, 1)	5 (5, 6)	5 (4, 6)	1 (1, 1)	12 (10, 13)	14 (12, 16)	14 (12, 16)	3 (2, 3)	31 (26, 36)
Linfen	Shanxi	North	Female	75 y～	8 (6, 9)	7 (6, 8)	1 (1, 2)	16 (13, 18)	2 (2, 2)	2 (2, 3)	0 (0, 0)	5 (4, 5)	2 (2, 3)	3 (2, 3)	0 (0, 1)	5 (4, 6)	1 (1, 2)	2 (1, 2)	0 (0, 0)	3 (3, 4)	1 (0, 1)	1 (1, 1)	0 (0, 0)	1 (1, 2)	8 (7, 9)	8 (7, 9)	2 (1, 2)	18 (15, 20)	22 (18, 25)	22 (18, 25)	4 (4, 5)	49 (40, 55)
Linfen	Shanxi	North	Female	80 y～	7 (6, 8)	7 (6, 8)	2 (1, 2)	16 (13, 18)	3 (2, 3)	3 (2, 3)	1 (1, 1)	6 (5, 7)	2 (1, 2)	2 (1, 2)	0 (0, 1)	4 (3, 5)	2 (2, 2)	2 (1, 2)	0 (0, 1)	4 (3, 5)	0 (0, 1)	0 (0, 1)	0 (0, 0)	1 (1, 1)	7 (6, 8)	7 (6, 8)	1 (1, 2)	16 (13, 18)	22 (18, 25)	20 (17, 24)	5 (4, 5)	47 (39, 54)
Linfen	Shanxi	North	Female	85 y～	9 (7, 10)	9 (7, 10)	2 (2, 2)	20 (16, 22)	4 (4, 5)	4 (4, 5)	1 (1, 1)	10 (8, 11)	1 (1, 1)	1 (1, 1)	0 (0, 0)	3 (2, 3)	4 (3, 5)	4 (3, 5)	1 (1, 1)	8 (7, 10)	0 (0, 0)	0 (0, 0)	0 (0, 0)	1 (1, 1)	7 (6, 8)	7 (6, 8)	1 (1, 2)	15 (13, 17)	26 (21, 30)	25 (20, 29)	6 (5, 7)	57 (47, 65)
Lvliang	Shanxi	North	Male	0 y～	0 (0, 0)	0 (0, 0)	0 (0, 0)	0 (0, 0)	0 (0, 0)	0 (0, 0)	0 (0, 0)	0 (0, 0)	0 (0, 0)	0 (0, 0)	0 (0, 0)	0 (0, 0)	0 (0, 0)	0 (0, 0)	0 (0, 0)	0 (0, 0)	0 (0, 0)	0 (0, 0)	0 (0, 0)	0 (0, 0)	0 (0, 0)	0 (0, 0)	0 (0, 0)	0 (0, 0)	0 (0, 0)	0 (0, 0)	0 (0, 0)	0 (0, 0)
Lvliang	Shanxi	North	Male	1 y～	0 (0, 0)	0 (0, 0)	0 (0, 0)	0 (0, 0)	0 (0, 0)	0 (0, 0)	0 (0, 0)	0 (0, 0)	0 (0, 0)	0 (0, 0)	0 (0, 0)	0 (0, 0)	0 (0, 0)	0 (0, 0)	0 (0, 0)	0 (0, 0)	0 (0, 0)	0 (0, 0)	0 (0, 0)	0 (0, 0)	0 (0, 0)	0 (0, 0)	0 (0, 0)	0 (0, 0)	0 (0, 0)	0 (0, 0)	0 (0, 0)	0 (0, 0)
Lvliang	Shanxi	North	Male	5 y～	0 (0, 0)	0 (0, 0)	0 (0, 0)	0 (0, 0)	0 (0, 0)	0 (0, 0)	0 (0, 0)	0 (0, 0)	0 (0, 0)	0 (0, 0)	0 (0, 0)	0 (0, 0)	0 (0, 0)	0 (0, 0)	0 (0, 0)	0 (0, 0)	0 (0, 0)	0 (0, 0)	0 (0, 0)	0 (0, 0)	0 (0, 0)	0 (0, 0)	0 (0, 0)	0 (0, 0)	0 (0, 0)	0 (0, 0)	0 (0, 0)	0 (0, 0)
Lvliang	Shanxi	North	Male	10 y～	0 (0, 0)	0 (0, 0)	0 (0, 0)	0 (0, 0)	0 (0, 0)	0 (0, 0)	0 (0, 0)	0 (0, 0)	0 (0, 0)	0 (0, 0)	0 (0, 0)	0 (0, 0)	0 (0, 0)	0 (0, 0)	0 (0, 0)	0 (0, 0)	0 (0, 0)	0 (0, 0)	0 (0, 0)	0 (0, 0)	0 (0, 0)	0 (0, 0)	0 (0, 0)	0 (0, 0)	0 (0, 0)	0 (0, 0)	0 (0, 0)	0 (0, 0)
Lvliang	Shanxi	North	Male	15 y～	0 (0, 0)	0 (0, 0)	0 (0, 0)	0 (0, 0)	0 (0, 0)	0 (0, 0)	0 (0, 0)	0 (0, 0)	0 (0, 0)	0 (0, 0)	0 (0, 0)	0 (0, 0)	0 (0, 0)	0 (0, 0)	0 (0, 0)	0 (0, 0)	0 (0, 0)	0 (0, 0)	0 (0, 0)	0 (0, 0)	0 (0, 0)	0 (0, 0)	0 (0, 0)	0 (0, 0)	0 (0, 0)	0 (0, 0)	0 (0, 0)	0 (0, 0)
Lvliang	Shanxi	North	Male	20 y～	0 (0, 0)	0 (0, 0)	0 (0, 0)	0 (0, 0)	0 (0, 0)	0 (0, 0)	0 (0, 0)	0 (0, 0)	0 (0, 0)	0 (0, 0)	0 (0, 0)	0 (0, 0)	0 (0, 0)	0 (0, 0)	0 (0, 0)	0 (0, 0)	0 (0, 0)	0 (0, 0)	0 (0, 0)	0 (0, 0)	0 (0, 0)	0 (0, 0)	0 (0, 0)	0 (0, 0)	0 (0, 0)	0 (0, 0)	0 (0, 0)	0 (0, 0)
Lvliang	Shanxi	North	Male	25 y～	0 (0, 0)	0 (0, 0)	0 (0, 0)	0 (0, 0)	0 (0, 0)	0 (0, 0)	0 (0, 0)	0 (0, 0)	0 (0, 0)	0 (0, 0)	0 (0, 0)	0 (0, 0)	0 (0, 0)	0 (0, 0)	0 (0, 0)	0 (0, 0)	0 (0, 0)	0 (0, 0)	0 (0, 0)	0 (0, 0)	0 (0, 0)	0 (0, 0)	0 (0, 0)	0 (0, 0)	0 (0, 0)	0 (0, 0)	0 (0, 0)	0 (0, 0)
Lvliang	Shanxi	North	Male	30 y～	0 (0, 0)	0 (0, 0)	0 (0, 0)	0 (0, 1)	0 (0, 0)	0 (0, 0)	0 (0, 0)	0 (0, 0)	0 (0, 0)	0 (0, 0)	0 (0, 0)	0 (0, 0)	0 (0, 0)	0 (0, 0)	0 (0, 0)	0 (0, 0)	0 (0, 0)	0 (0, 0)	0 (0, 0)	0 (0, 0)	0 (0, 0)	0 (0, 0)	0 (0, 0)	0 (0, 0)	0 (0, 0)	0 (0, 0)	0 (0, 0)	1 (1, 1)
Lvliang	Shanxi	North	Male	35 y～	0 (0, 0)	0 (0, 1)	0 (0, 0)	1 (1, 1)	0 (0, 0)	0 (0, 0)	0 (0, 0)	0 (0, 0)	0 (0, 0)	0 (0, 0)	0 (0, 0)	0 (0, 0)	0 (0, 0)	0 (0, 0)	0 (0, 0)	0 (0, 0)	0 (0, 0)	0 (0, 0)	0 (0, 0)	0 (0, 0)	0 (0, 0)	0 (0, 0)	0 (0, 0)	1 (1, 1)	1 (1, 1)	1 (1, 1)	0 (0, 0)	2 (2, 2)
Lvliang	Shanxi	North	Male	40 y～	1 (1, 1)	1 (1, 1)	0 (0, 0)	2 (2, 2)	0 (0, 0)	0 (0, 0)	0 (0, 0)	0 (0, 0)	0 (0, 0)	0 (0, 0)	0 (0, 0)	0 (0, 0)	0 (0, 0)	0 (0, 0)	0 (0, 0)	0 (0, 0)	0 (0, 0)	0 (0, 0)	0 (0, 0)	0 (0, 0)	1 (1, 1)	1 (1, 1)	0 (0, 0)	2 (1, 2)	2 (1, 2)	2 (2, 2)	1 (1, 1)	4 (4, 5)
Lvliang	Shanxi	North	Male	45 y～	1 (1, 1)	1 (1, 1)	1 (0, 1)	3 (2, 3)	0 (0, 0)	0 (0, 0)	0 (0, 0)	0 (0, 0)	0 (0, 0)	0 (0, 0)	0 (0, 0)	1 (0, 1)	0 (0, 0)	0 (0, 0)	0 (0, 0)	0 (0, 0)	0 (0, 0)	0 (0, 0)	0 (0, 0)	0 (0, 0)	1 (1, 1)	1 (1, 1)	0 (0, 1)	3 (2, 3)	2 (2, 3)	2 (2, 3)	1 (1, 1)	6 (5, 7)
Lvliang	Shanxi	North	Male	50 y～	1 (1, 1)	1 (1, 1)	1 (1, 1)	3 (3, 3)	0 (0, 0)	0 (0, 0)	0 (0, 0)	0 (0, 0)	0 (0, 1)	0 (0, 1)	0 (0, 0)	1 (1, 1)	0 (0, 0)	0 (0, 0)	0 (0, 0)	0 (0, 0)	0 (0, 0)	0 (0, 0)	0 (0, 0)	0 (0, 0)	1 (1, 1)	1 (1, 1)	1 (1, 1)	3 (3, 3)	3 (3, 4)	3 (3, 4)	2 (1, 2)	8 (7, 9)
Lvliang	Shanxi	North	Male	55 y～	2 (2, 2)	2 (2, 2)	1 (1, 1)	5 (5, 6)	0 (0, 0)	0 (0, 0)	0 (0, 0)	1 (0, 1)	1 (1, 1)	1 (1, 1)	1 (0, 1)	3 (2, 3)	0 (0, 0)	0 (0, 0)	0 (0, 0)	0 (0, 0)	0 (0, 0)	0 (0, 0)	0 (0, 0)	0 (0, 0)	2 (2, 2)	2 (2, 2)	1 (1, 1)	5 (5, 6)	6 (5, 7)	6 (5, 7)	3 (2, 3)	15 (12, 17)
Lvliang	Shanxi	North	Male	60 y～	2 (1, 2)	2 (2, 2)	1 (1, 1)	4 (4, 5)	0 (0, 0)	0 (0, 0)	0 (0, 0)	1 (1, 1)	1 (1, 2)	1 (1, 1)	1 (0, 1)	3 (2, 4)	0 (0, 0)	0 (0, 0)	0 (0, 0)	0 (0, 1)	0 (0, 0)	0 (0, 0)	0 (0, 0)	0 (0, 0)	2 (2, 2)	2 (2, 2)	1 (1, 1)	5 (4, 6)	6 (5, 6)	6 (5, 6)	3 (2, 3)	14 (11, 16)
Lvliang	Shanxi	North	Male	65 y～	2 (1, 2)	2 (2, 2)	1 (1, 1)	4 (4, 5)	0 (0, 1)	0 (0, 0)	0 (0, 0)	1 (1, 1)	2 (1, 2)	1 (1, 2)	1 (1, 1)	3 (3, 4)	0 (0, 0)	0 (0, 0)	0 (0, 0)	1 (0, 1)	0 (0, 0)	0 (0, 0)	0 (0, 0)	0 (0, 0)	2 (2, 2)	2 (2, 3)	1 (1, 1)	5 (5, 6)	6 (5, 7)	6 (5, 7)	3 (2, 3)	15 (12, 17)
Lvliang	Shanxi	North	Male	70 y～	2 (2, 2)	2 (2, 2)	1 (1, 1)	5 (4, 6)	1 (1, 1)	1 (1, 1)	0 (0, 0)	2 (2, 3)	2 (1, 2)	1 (1, 2)	1 (1, 1)	4 (3, 5)	0 (0, 1)	0 (0, 0)	0 (0, 0)	1 (1, 1)	0 (0, 0)	0 (0, 0)	0 (0, 0)	0 (0, 0)	3 (2, 3)	3 (3, 3)	1 (1, 1)	7 (6, 8)	8 (7, 9)	8 (6, 9)	4 (3, 4)	20 (16, 23)
Lvliang	Shanxi	North	Male	75 y～	2 (2, 3)	3 (2, 3)	1 (1, 1)	6 (5, 7)	2 (1, 2)	1 (1, 2)	1 (1, 1)	4 (3, 4)	2 (1, 2)	1 (1, 2)	1 (1, 1)	4 (3, 5)	1 (0, 1)	1 (0, 1)	0 (0, 0)	1 (1, 2)	0 (0, 0)	0 (0, 0)	0 (0, 0)	0 (0, 0)	3 (3, 4)	3 (3, 4)	1 (1, 2)	8 (7, 9)	10 (8, 11)	9 (8, 11)	4 (4, 5)	23 (19, 27)
Lvliang	Shanxi	North	Male	80 y～	2 (1, 2)	2 (2, 2)	1 (1, 1)	5 (4, 5)	1 (1, 1)	1 (1, 2)	1 (0, 1)	3 (3, 4)	1 (1, 1)	1 (1, 1)	0 (0, 0)	2 (2, 3)	1 (1, 1)	1 (1, 1)	0 (0, 0)	2 (1, 2)	0 (0, 0)	0 (0, 0)	0 (0, 0)	0 (0, 0)	2 (2, 2)	2 (2, 3)	1 (1, 1)	5 (5, 6)	7 (6, 8)	8 (6, 9)	3 (3, 4)	17 (14, 20)
Lvliang	Shanxi	North	Male	85 y～	2 (1, 2)	2 (1, 2)	1 (1, 1)	4 (3, 5)	1 (1, 2)	1 (1, 2)	1 (1, 1)	3 (3, 4)	0 (0, 1)	1 (0, 1)	0 (0, 0)	1 (1, 2)	1 (1, 1)	1 (1, 1)	0 (0, 1)	3 (2, 3)	0 (0, 0)	0 (0, 0)	0 (0, 0)	0 (0, 0)	1 (1, 2)	2 (1, 2)	1 (1, 1)	4 (3, 4)	6 (5, 7)	7 (5, 8)	3 (2, 3)	15 (13, 18)
Lvliang	Shanxi	North	Female	0 y～	0 (0, 0)	0 (0, 0)	0 (0, 0)	0 (0, 0)	0 (0, 0)	0 (0, 0)	0 (0, 0)	0 (0, 0)	0 (0, 0)	0 (0, 0)	0 (0, 0)	0 (0, 0)	0 (0, 0)	0 (0, 0)	0 (0, 0)	0 (0, 0)	0 (0, 0)	0 (0, 0)	0 (0, 0)	0 (0, 0)	0 (0, 0)	0 (0, 0)	0 (0, 0)	0 (0, 0)	0 (0, 0)	0 (0, 0)	0 (0, 0)	0 (0, 0)
Lvliang	Shanxi	North	Female	1 y～	0 (0, 0)	0 (0, 0)	0 (0, 0)	0 (0, 0)	0 (0, 0)	0 (0, 0)	0 (0, 0)	0 (0, 0)	0 (0, 0)	0 (0, 0)	0 (0, 0)	0 (0, 0)	0 (0, 0)	0 (0, 0)	0 (0, 0)	0 (0, 0)	0 (0, 0)	0 (0, 0)	0 (0, 0)	0 (0, 0)	0 (0, 0)	0 (0, 0)	0 (0, 0)	0 (0, 0)	0 (0, 0)	0 (0, 0)	0 (0, 0)	0 (0, 0)
Lvliang	Shanxi	North	Female	5 y～	0 (0, 0)	0 (0, 0)	0 (0, 0)	0 (0, 0)	0 (0, 0)	0 (0, 0)	0 (0, 0)	0 (0, 0)	0 (0, 0)	0 (0, 0)	0 (0, 0)	0 (0, 0)	0 (0, 0)	0 (0, 0)	0 (0, 0)	0 (0, 0)	0 (0, 0)	0 (0, 0)	0 (0, 0)	0 (0, 0)	0 (0, 0)	0 (0, 0)	0 (0, 0)	0 (0, 0)	0 (0, 0)	0 (0, 0)	0 (0, 0)	0 (0, 0)
Lvliang	Shanxi	North	Female	10 y～	0 (0, 0)	0 (0, 0)	0 (0, 0)	0 (0, 0)	0 (0, 0)	0 (0, 0)	0 (0, 0)	0 (0, 0)	0 (0, 0)	0 (0, 0)	0 (0, 0)	0 (0, 0)	0 (0, 0)	0 (0, 0)	0 (0, 0)	0 (0, 0)	0 (0, 0)	0 (0, 0)	0 (0, 0)	0 (0, 0)	0 (0, 0)	0 (0, 0)	0 (0, 0)	0 (0, 0)	0 (0, 0)	0 (0, 0)	0 (0, 0)	0 (0, 0)
Lvliang	Shanxi	North	Female	15 y～	0 (0, 0)	0 (0, 0)	0 (0, 0)	0 (0, 0)	0 (0, 0)	0 (0, 0)	0 (0, 0)	0 (0, 0)	0 (0, 0)	0 (0, 0)	0 (0, 0)	0 (0, 0)	0 (0, 0)	0 (0, 0)	0 (0, 0)	0 (0, 0)	0 (0, 0)	0 (0, 0)	0 (0, 0)	0 (0, 0)	0 (0, 0)	0 (0, 0)	0 (0, 0)	0 (0, 0)	0 (0, 0)	0 (0, 0)	0 (0, 0)	0 (0, 0)
Lvliang	Shanxi	North	Female	20 y～	0 (0, 0)	0 (0, 0)	0 (0, 0)	0 (0, 0)	0 (0, 0)	0 (0, 0)	0 (0, 0)	0 (0, 0)	0 (0, 0)	0 (0, 0)	0 (0, 0)	0 (0, 0)	0 (0, 0)	0 (0, 0)	0 (0, 0)	0 (0, 0)	0 (0, 0)	0 (0, 0)	0 (0, 0)	0 (0, 0)	0 (0, 0)	0 (0, 0)	0 (0, 0)	0 (0, 0)	0 (0, 0)	0 (0, 0)	0 (0, 0)	0 (0, 0)
Lvliang	Shanxi	North	Female	25 y～	0 (0, 0)	0 (0, 0)	0 (0, 0)	0 (0, 0)	0 (0, 0)	0 (0, 0)	0 (0, 0)	0 (0, 0)	0 (0, 0)	0 (0, 0)	0 (0, 0)	0 (0, 0)	0 (0, 0)	0 (0, 0)	0 (0, 0)	0 (0, 0)	0 (0, 0)	0 (0, 0)	0 (0, 0)	0 (0, 0)	0 (0, 0)	0 (0, 0)	0 (0, 0)	0 (0, 0)	0 (0, 0)	0 (0, 0)	0 (0, 0)	0 (0, 0)
Lvliang	Shanxi	North	Female	30 y～	0 (0, 0)	0 (0, 0)	0 (0, 0)	0 (0, 0)	0 (0, 0)	0 (0, 0)	0 (0, 0)	0 (0, 0)	0 (0, 0)	0 (0, 0)	0 (0, 0)	0 (0, 0)	0 (0, 0)	0 (0, 0)	0 (0, 0)	0 (0, 0)	0 (0, 0)	0 (0, 0)	0 (0, 0)	0 (0, 0)	0 (0, 0)	0 (0, 0)	0 (0, 0)	0 (0, 0)	0 (0, 0)	0 (0, 0)	0 (0, 0)	0 (0, 0)
Lvliang	Shanxi	North	Female	35 y～	0 (0, 0)	0 (0, 0)	0 (0, 0)	0 (0, 0)	0 (0, 0)	0 (0, 0)	0 (0, 0)	0 (0, 0)	0 (0, 0)	0 (0, 0)	0 (0, 0)	0 (0, 0)	0 (0, 0)	0 (0, 0)	0 (0, 0)	0 (0, 0)	0 (0, 0)	0 (0, 0)	0 (0, 0)	0 (0, 0)	0 (0, 0)	0 (0, 0)	0 (0, 0)	0 (0, 0)	0 (0, 0)	0 (0, 0)	0 (0, 0)	1 (1, 1)
Lvliang	Shanxi	North	Female	40 y～	0 (0, 0)	0 (0, 0)	0 (0, 0)	0 (0, 0)	0 (0, 0)	0 (0, 0)	0 (0, 0)	0 (0, 0)	0 (0, 0)	0 (0, 0)	0 (0, 0)	0 (0, 0)	0 (0, 0)	0 (0, 0)	0 (0, 0)	0 (0, 0)	0 (0, 0)	0 (0, 0)	0 (0, 0)	0 (0, 0)	0 (0, 0)	0 (0, 0)	0 (0, 0)	0 (0, 1)	0 (0, 0)	1 (1, 1)	0 (0, 0)	1 (1, 1)
Lvliang	Shanxi	North	Female	45 y～	0 (0, 0)	0 (0, 0)	0 (0, 0)	1 (1, 1)	0 (0, 0)	0 (0, 0)	0 (0, 0)	0 (0, 0)	0 (0, 0)	0 (0, 0)	0 (0, 0)	0 (0, 0)	0 (0, 0)	0 (0, 0)	0 (0, 0)	0 (0, 0)	0 (0, 0)	0 (0, 0)	0 (0, 0)	0 (0, 0)	0 (0, 0)	0 (0, 0)	0 (0, 0)	1 (1, 1)	1 (1, 1)	1 (1, 1)	0 (0, 0)	2 (2, 2)
Lvliang	Shanxi	North	Female	50 y～	0 (0, 0)	0 (0, 1)	0 (0, 0)	1 (1, 1)	0 (0, 0)	0 (0, 0)	0 (0, 0)	0 (0, 0)	0 (0, 0)	0 (0, 0)	0 (0, 0)	0 (0, 1)	0 (0, 0)	0 (0, 0)	0 (0, 0)	0 (0, 0)	0 (0, 0)	0 (0, 0)	0 (0, 0)	0 (0, 0)	0 (0, 0)	1 (0, 1)	0 (0, 0)	1 (1, 1)	1 (1, 1)	1 (1, 2)	0 (0, 0)	3 (2, 3)
Lvliang	Shanxi	North	Female	55 y～	1 (0, 1)	1 (1, 1)	0 (0, 0)	2 (1, 2)	0 (0, 0)	0 (0, 0)	0 (0, 0)	0 (0, 0)	0 (0, 0)	1 (0, 1)	0 (0, 0)	1 (1, 1)	0 (0, 0)	0 (0, 0)	0 (0, 0)	0 (0, 0)	0 (0, 0)	0 (0, 0)	0 (0, 0)	0 (0, 0)	1 (0, 1)	1 (1, 1)	0 (0, 0)	1 (1, 2)	2 (1, 2)	2 (2, 3)	0 (0, 1)	4 (4, 5)
Lvliang	Shanxi	North	Female	60 y～	1 (0, 1)	1 (1, 1)	0 (0, 0)	2 (1, 2)	0 (0, 0)	0 (0, 0)	0 (0, 0)	0 (0, 0)	0 (0, 0)	1 (0, 1)	0 (0, 0)	1 (1, 1)	0 (0, 0)	0 (0, 0)	0 (0, 0)	0 (0, 0)	0 (0, 0)	0 (0, 0)	0 (0, 0)	0 (0, 0)	1 (1, 1)	1 (1, 1)	0 (0, 0)	2 (2, 2)	2 (1, 2)	3 (2, 3)	1 (0, 1)	5 (4, 6)
Lvliang	Shanxi	North	Female	65 y～	1 (1, 1)	1 (1, 1)	0 (0, 0)	2 (2, 2)	0 (0, 0)	0 (0, 0)	0 (0, 0)	0 (0, 0)	0 (0, 0)	1 (0, 1)	0 (0, 0)	1 (1, 1)	0 (0, 0)	0 (0, 0)	0 (0, 0)	0 (0, 0)	0 (0, 0)	0 (0, 0)	0 (0, 0)	0 (0, 0)	1 (1, 1)	1 (1, 1)	0 (0, 0)	2 (2, 3)	2 (2, 3)	4 (3, 4)	1 (1, 1)	7 (6, 8)
Lvliang	Shanxi	North	Female	70 y～	1 (1, 1)	2 (1, 2)	0 (0, 0)	3 (3, 4)	0 (0, 0)	0 (0, 0)	0 (0, 0)	1 (1, 1)	0 (0, 1)	1 (1, 1)	0 (0, 0)	1 (1, 2)	0 (0, 0)	0 (0, 0)	0 (0, 0)	0 (0, 1)	0 (0, 0)	0 (0, 0)	0 (0, 0)	0 (0, 0)	1 (1, 2)	2 (2, 2)	0 (0, 0)	4 (3, 4)	4 (3, 4)	5 (4, 6)	1 (1, 1)	10 (8, 12)
Lvliang	Shanxi	North	Female	75 y～	2 (2, 2)	3 (2, 3)	1 (0, 1)	5 (4, 6)	0 (0, 1)	1 (1, 1)	0 (0, 0)	1 (1, 2)	1 (0, 1)	1 (1, 1)	0 (0, 0)	2 (1, 2)	0 (0, 0)	1 (0, 1)	0 (0, 0)	1 (1, 1)	0 (0, 0)	0 (0, 0)	0 (0, 0)	0 (0, 1)	2 (2, 2)	3 (3, 3)	1 (1, 1)	6 (5, 6)	5 (5, 6)	8 (7, 10)	2 (1, 2)	16 (13, 18)
Lvliang	Shanxi	North	Female	80 y～	2 (1, 2)	3 (2, 3)	1 (0, 1)	5 (4, 6)	1 (1, 1)	1 (1, 1)	0 (0, 0)	2 (2, 2)	0 (0, 1)	1 (0, 1)	0 (0, 0)	1 (1, 2)	0 (0, 1)	1 (1, 1)	0 (0, 0)	1 (1, 2)	0 (0, 0)	0 (0, 0)	0 (0, 0)	0 (0, 0)	2 (2, 2)	3 (2, 3)	1 (0, 1)	5 (4, 6)	5 (4, 6)	8 (6, 9)	2 (1, 2)	15 (12, 17)
Lvliang	Shanxi	North	Female	85 y～	2 (2, 3)	3 (3, 4)	1 (1, 1)	6 (5, 7)	1 (1, 1)	2 (1, 2)	0 (0, 0)	3 (3, 3)	0 (0, 0)	0 (0, 1)	0 (0, 0)	1 (1, 1)	1 (1, 1)	1 (1, 2)	0 (0, 0)	3 (2, 3)	0 (0, 0)	0 (0, 0)	0 (0, 0)	0 (0, 0)	2 (2, 2)	3 (2, 3)	1 (0, 1)	5 (4, 6)	6 (5, 8)	9 (8, 11)	2 (2, 3)	18 (15, 21)
Suzhou	Shanxi	North	Male	0 y～	0 (0, 0)	0 (0, 0)	0 (0, 0)	0 (0, 0)	0 (0, 0)	0 (0, 0)	0 (0, 0)	0 (0, 0)	0 (0, 0)	0 (0, 0)	0 (0, 0)	0 (0, 0)	0 (0, 0)	0 (0, 0)	0 (0, 0)	0 (0, 0)	0 (0, 0)	0 (0, 0)	0 (0, 0)	0 (0, 0)	0 (0, 0)	0 (0, 0)	0 (0, 0)	0 (0, 0)	0 (0, 0)	0 (0, 0)	0 (0, 0)	0 (0, 0)
Suzhou	Shanxi	North	Male	1 y～	0 (0, 0)	0 (0, 0)	0 (0, 0)	0 (0, 0)	0 (0, 0)	0 (0, 0)	0 (0, 0)	0 (0, 0)	0 (0, 0)	0 (0, 0)	0 (0, 0)	0 (0, 0)	0 (0, 0)	0 (0, 0)	0 (0, 0)	0 (0, 0)	0 (0, 0)	0 (0, 0)	0 (0, 0)	0 (0, 0)	0 (0, 0)	0 (0, 0)	0 (0, 0)	0 (0, 0)	0 (0, 0)	0 (0, 0)	0 (0, 0)	0 (0, 0)
Suzhou	Shanxi	North	Male	5 y～	0 (0, 0)	0 (0, 0)	0 (0, 0)	0 (0, 0)	0 (0, 0)	0 (0, 0)	0 (0, 0)	0 (0, 0)	0 (0, 0)	0 (0, 0)	0 (0, 0)	0 (0, 0)	0 (0, 0)	0 (0, 0)	0 (0, 0)	0 (0, 0)	0 (0, 0)	0 (0, 0)	0 (0, 0)	0 (0, 0)	0 (0, 0)	0 (0, 0)	0 (0, 0)	0 (0, 0)	0 (0, 0)	0 (0, 0)	0 (0, 0)	0 (0, 0)
Suzhou	Shanxi	North	Male	10 y～	0 (0, 0)	0 (0, 0)	0 (0, 0)	0 (0, 0)	0 (0, 0)	0 (0, 0)	0 (0, 0)	0 (0, 0)	0 (0, 0)	0 (0, 0)	0 (0, 0)	0 (0, 0)	0 (0, 0)	0 (0, 0)	0 (0, 0)	0 (0, 0)	0 (0, 0)	0 (0, 0)	0 (0, 0)	0 (0, 0)	0 (0, 0)	0 (0, 0)	0 (0, 0)	0 (0, 0)	0 (0, 0)	0 (0, 0)	0 (0, 0)	0 (0, 0)
Suzhou	Shanxi	North	Male	15 y～	0 (0, 0)	0 (0, 0)	0 (0, 0)	0 (0, 0)	0 (0, 0)	0 (0, 0)	0 (0, 0)	0 (0, 0)	0 (0, 0)	0 (0, 0)	0 (0, 0)	0 (0, 0)	0 (0, 0)	0 (0, 0)	0 (0, 0)	0 (0, 0)	0 (0, 0)	0 (0, 0)	0 (0, 0)	0 (0, 0)	0 (0, 0)	0 (0, 0)	0 (0, 0)	0 (0, 0)	0 (0, 0)	0 (0, 0)	0 (0, 0)	1 (0, 1)
Suzhou	Shanxi	North	Male	20 y～	0 (0, 0)	0 (0, 0)	0 (0, 0)	0 (0, 0)	0 (0, 0)	0 (0, 0)	0 (0, 0)	0 (0, 0)	0 (0, 0)	0 (0, 0)	0 (0, 0)	0 (0, 0)	0 (0, 0)	0 (0, 0)	0 (0, 0)	0 (0, 0)	0 (0, 0)	0 (0, 0)	0 (0, 0)	0 (0, 0)	0 (0, 0)	0 (0, 0)	0 (0, 0)	0 (0, 0)	0 (0, 0)	0 (0, 0)	0 (0, 0)	1 (1, 1)
Suzhou	Shanxi	North	Male	25 y～	0 (0, 0)	0 (0, 0)	0 (0, 0)	0 (0, 0)	0 (0, 0)	0 (0, 0)	0 (0, 0)	0 (0, 0)	0 (0, 0)	0 (0, 0)	0 (0, 0)	0 (0, 0)	0 (0, 0)	0 (0, 0)	0 (0, 0)	0 (0, 0)	0 (0, 0)	0 (0, 0)	0 (0, 0)	0 (0, 0)	0 (0, 0)	0 (0, 0)	0 (0, 0)	0 (0, 0)	0 (0, 0)	0 (0, 0)	0 (0, 0)	1 (1, 1)
Suzhou	Shanxi	North	Male	30 y～	0 (0, 0)	1 (0, 1)	0 (0, 0)	1 (1, 1)	0 (0, 0)	0 (0, 0)	0 (0, 0)	0 (0, 0)	0 (0, 0)	0 (0, 0)	0 (0, 0)	0 (0, 0)	0 (0, 0)	0 (0, 0)	0 (0, 0)	0 (0, 0)	0 (0, 0)	0 (0, 0)	0 (0, 0)	0 (0, 0)	0 (0, 0)	0 (0, 0)	0 (0, 0)	1 (1, 1)	1 (1, 1)	1 (1, 1)	0 (0, 0)	2 (2, 3)
Suzhou	Shanxi	North	Male	35 y～	1 (1, 1)	1 (1, 1)	0 (0, 0)	3 (2, 3)	0 (0, 0)	0 (0, 0)	0 (0, 0)	0 (0, 0)	0 (0, 0)	0 (0, 0)	0 (0, 0)	0 (0, 1)	0 (0, 0)	0 (0, 0)	0 (0, 0)	0 (0, 0)	0 (0, 0)	0 (0, 0)	0 (0, 0)	0 (0, 0)	1 (1, 1)	1 (1, 1)	0 (0, 0)	2 (2, 2)	2 (2, 2)	2 (2, 3)	1 (1, 1)	5 (4, 6)
Suzhou	Shanxi	North	Male	40 y～	2 (2, 2)	2 (2, 2)	1 (1, 1)	5 (4, 5)	0 (0, 0)	0 (0, 0)	0 (0, 0)	0 (0, 0)	0 (0, 0)	0 (0, 0)	0 (0, 0)	1 (1, 1)	0 (0, 0)	0 (0, 0)	0 (0, 0)	0 (0, 0)	0 (0, 0)	0 (0, 0)	0 (0, 0)	0 (0, 0)	1 (1, 2)	2 (2, 2)	1 (1, 1)	4 (3, 4)	4 (3, 4)	5 (4, 5)	2 (2, 2)	10 (9, 11)
Suzhou	Shanxi	North	Male	45 y～	2 (2, 3)	3 (2, 3)	1 (1, 1)	6 (5, 7)	0 (0, 0)	0 (0, 0)	0 (0, 0)	0 (0, 0)	1 (0, 1)	1 (0, 1)	0 (0, 0)	1 (1, 2)	0 (0, 0)	0 (0, 0)	0 (0, 0)	0 (0, 0)	0 (0, 0)	0 (0, 0)	0 (0, 0)	0 (0, 0)	2 (2, 3)	2 (2, 3)	1 (1, 1)	6 (5, 7)	5 (5, 6)	6 (5, 7)	3 (2, 3)	14 (12, 16)
Suzhou	Shanxi	North	Male	50 y～	3 (2, 3)	3 (3, 3)	1 (1, 2)	7 (6, 8)	0 (0, 0)	0 (0, 0)	0 (0, 0)	0 (0, 0)	1 (1, 1)	1 (1, 1)	0 (0, 1)	3 (2, 3)	0 (0, 0)	0 (0, 0)	0 (0, 0)	1 (0, 1)	0 (0, 0)	0 (0, 0)	0 (0, 0)	0 (0, 0)	3 (2, 3)	3 (3, 3)	1 (1, 2)	7 (6, 8)	7 (6, 8)	8 (6, 9)	3 (3, 4)	18 (15, 21)
Suzhou	Shanxi	North	Male	55 y～	5 (4, 5)	5 (4, 6)	2 (2, 3)	12 (10, 14)	1 (0, 1)	1 (0, 1)	0 (0, 0)	1 (1, 1)	3 (2, 3)	3 (2, 3)	1 (1, 1)	6 (5, 8)	0 (0, 0)	0 (0, 0)	0 (0, 0)	1 (1, 1)	0 (0, 0)	0 (0, 0)	0 (0, 0)	1 (0, 1)	5 (4, 5)	5 (5, 6)	2 (2, 3)	12 (11, 14)	13 (11, 15)	14 (12, 16)	6 (5, 7)	34 (28, 38)
Suzhou	Shanxi	North	Male	60 y～	4 (3, 4)	4 (4, 5)	2 (2, 2)	10 (8, 11)	1 (1, 1)	1 (1, 1)	0 (0, 0)	2 (2, 2)	3 (2, 4)	3 (2, 3)	1 (1, 2)	7 (6, 9)	0 (0, 1)	0 (0, 1)	0 (0, 0)	1 (1, 1)	0 (0, 0)	0 (0, 0)	0 (0, 0)	1 (0, 1)	4 (4, 5)	5 (4, 6)	2 (2, 2)	12 (10, 13)	13 (11, 15)	14 (11, 16)	6 (5, 7)	32 (27, 37)
Suzhou	Shanxi	North	Male	65 y～	4 (3, 4)	4 (4, 5)	2 (2, 2)	10 (8, 11)	1 (1, 1)	1 (1, 1)	0 (0, 1)	3 (2, 3)	3 (3, 4)	3 (2, 4)	2 (1, 2)	8 (6, 10)	1 (0, 1)	1 (0, 1)	0 (0, 0)	1 (1, 2)	0 (0, 0)	0 (0, 0)	0 (0, 0)	1 (0, 1)	5 (4, 5)	5 (5, 6)	2 (2, 3)	12 (11, 14)	14 (11, 16)	15 (12, 17)	6 (5, 7)	35 (29, 41)
Suzhou	Shanxi	North	Male	70 y～	5 (4, 5)	5 (4, 6)	2 (2, 2)	12 (10, 14)	2 (2, 3)	2 (2, 2)	1 (1, 1)	5 (4, 6)	4 (3, 5)	4 (3, 4)	2 (1, 2)	9 (7, 11)	1 (1, 1)	1 (1, 1)	0 (0, 1)	2 (2, 3)	0 (0, 0)	0 (0, 0)	0 (0, 0)	1 (1, 1)	6 (5, 7)	7 (6, 8)	3 (3, 3)	16 (14, 18)	18 (15, 21)	19 (16, 22)	8 (7, 10)	45 (37, 53)
Suzhou	Shanxi	North	Male	75 y～	5 (4, 6)	6 (5, 7)	3 (2, 3)	14 (11, 16)	3 (3, 4)	3 (3, 4)	2 (1, 2)	8 (7, 9)	4 (3, 5)	3 (3, 4)	2 (1, 2)	9 (7, 11)	1 (1, 2)	1 (1, 2)	1 (0, 1)	3 (3, 4)	0 (0, 0)	0 (0, 0)	0 (0, 0)	1 (1, 1)	7 (6, 8)	8 (7, 9)	3 (3, 4)	19 (16, 21)	22 (18, 25)	23 (19, 26)	10 (8, 12)	54 (44, 63)
Suzhou	Shanxi	North	Male	80 y～	4 (3, 5)	5 (4, 6)	2 (1, 2)	11 (9, 12)	3 (2, 3)	4 (3, 4)	1 (1, 1)	8 (6, 9)	2 (1, 2)	2 (2, 3)	1 (1, 1)	5 (4, 6)	1 (1, 2)	2 (1, 2)	1 (0, 1)	4 (3, 5)	0 (0, 0)	0 (0, 0)	0 (0, 0)	1 (1, 1)	5 (4, 5)	6 (5, 6)	2 (2, 3)	13 (11, 14)	15 (12, 18)	18 (15, 21)	7 (6, 8)	40 (33, 47)
Suzhou	Shanxi	North	Male	85 y～	4 (3, 4)	4 (4, 5)	2 (1, 2)	10 (8, 11)	3 (2, 3)	4 (3, 4)	1 (1, 1)	8 (7, 9)	1 (1, 1)	1 (1, 2)	0 (0, 1)	3 (2, 4)	2 (2, 3)	3 (2, 3)	1 (1, 1)	6 (5, 8)	0 (0, 0)	0 (0, 0)	0 (0, 0)	1 (0, 1)	3 (3, 4)	4 (3, 4)	2 (1, 2)	9 (7, 10)	13 (11, 16)	16 (13, 19)	6 (5, 7)	36 (29, 42)
Suzhou	Shanxi	North	Female	0 y～	0 (0, 0)	0 (0, 0)	0 (0, 0)	0 (0, 0)	0 (0, 0)	0 (0, 0)	0 (0, 0)	0 (0, 0)	0 (0, 0)	0 (0, 0)	0 (0, 0)	0 (0, 0)	0 (0, 0)	0 (0, 0)	0 (0, 0)	0 (0, 0)	0 (0, 0)	0 (0, 0)	0 (0, 0)	0 (0, 0)	0 (0, 0)	0 (0, 0)	0 (0, 0)	0 (0, 0)	0 (0, 0)	0 (0, 0)	0 (0, 0)	0 (0, 0)
Suzhou	Shanxi	North	Female	1 y～	0 (0, 0)	0 (0, 0)	0 (0, 0)	0 (0, 0)	0 (0, 0)	0 (0, 0)	0 (0, 0)	0 (0, 0)	0 (0, 0)	0 (0, 0)	0 (0, 0)	0 (0, 0)	0 (0, 0)	0 (0, 0)	0 (0, 0)	0 (0, 0)	0 (0, 0)	0 (0, 0)	0 (0, 0)	0 (0, 0)	0 (0, 0)	0 (0, 0)	0 (0, 0)	0 (0, 0)	0 (0, 0)	0 (0, 0)	0 (0, 0)	0 (0, 0)
Suzhou	Shanxi	North	Female	5 y～	0 (0, 0)	0 (0, 0)	0 (0, 0)	0 (0, 0)	0 (0, 0)	0 (0, 0)	0 (0, 0)	0 (0, 0)	0 (0, 0)	0 (0, 0)	0 (0, 0)	0 (0, 0)	0 (0, 0)	0 (0, 0)	0 (0, 0)	0 (0, 0)	0 (0, 0)	0 (0, 0)	0 (0, 0)	0 (0, 0)	0 (0, 0)	0 (0, 0)	0 (0, 0)	0 (0, 0)	0 (0, 0)	0 (0, 0)	0 (0, 0)	0 (0, 0)
Suzhou	Shanxi	North	Female	10 y～	0 (0, 0)	0 (0, 0)	0 (0, 0)	0 (0, 0)	0 (0, 0)	0 (0, 0)	0 (0, 0)	0 (0, 0)	0 (0, 0)	0 (0, 0)	0 (0, 0)	0 (0, 0)	0 (0, 0)	0 (0, 0)	0 (0, 0)	0 (0, 0)	0 (0, 0)	0 (0, 0)	0 (0, 0)	0 (0, 0)	0 (0, 0)	0 (0, 0)	0 (0, 0)	0 (0, 0)	0 (0, 0)	0 (0, 0)	0 (0, 0)	0 (0, 0)
Suzhou	Shanxi	North	Female	15 y～	0 (0, 0)	0 (0, 0)	0 (0, 0)	0 (0, 0)	0 (0, 0)	0 (0, 0)	0 (0, 0)	0 (0, 0)	0 (0, 0)	0 (0, 0)	0 (0, 0)	0 (0, 0)	0 (0, 0)	0 (0, 0)	0 (0, 0)	0 (0, 0)	0 (0, 0)	0 (0, 0)	0 (0, 0)	0 (0, 0)	0 (0, 0)	0 (0, 0)	0 (0, 0)	0 (0, 0)	0 (0, 0)	0 (0, 0)	0 (0, 0)	0 (0, 0)
Suzhou	Shanxi	North	Female	20 y～	0 (0, 0)	0 (0, 0)	0 (0, 0)	0 (0, 0)	0 (0, 0)	0 (0, 0)	0 (0, 0)	0 (0, 0)	0 (0, 0)	0 (0, 0)	0 (0, 0)	0 (0, 0)	0 (0, 0)	0 (0, 0)	0 (0, 0)	0 (0, 0)	0 (0, 0)	0 (0, 0)	0 (0, 0)	0 (0, 0)	0 (0, 0)	0 (0, 0)	0 (0, 0)	0 (0, 0)	0 (0, 0)	0 (0, 0)	0 (0, 0)	0 (0, 0)
Suzhou	Shanxi	North	Female	25 y～	0 (0, 0)	0 (0, 0)	0 (0, 0)	0 (0, 0)	0 (0, 0)	0 (0, 0)	0 (0, 0)	0 (0, 0)	0 (0, 0)	0 (0, 0)	0 (0, 0)	0 (0, 0)	0 (0, 0)	0 (0, 0)	0 (0, 0)	0 (0, 0)	0 (0, 0)	0 (0, 0)	0 (0, 0)	0 (0, 0)	0 (0, 0)	0 (0, 0)	0 (0, 0)	0 (0, 0)	0 (0, 0)	0 (0, 0)	0 (0, 0)	0 (0, 0)
Suzhou	Shanxi	North	Female	30 y～	0 (0, 0)	0 (0, 0)	0 (0, 0)	0 (0, 0)	0 (0, 0)	0 (0, 0)	0 (0, 0)	0 (0, 0)	0 (0, 0)	0 (0, 0)	0 (0, 0)	0 (0, 0)	0 (0, 0)	0 (0, 0)	0 (0, 0)	0 (0, 0)	0 (0, 0)	0 (0, 0)	0 (0, 0)	0 (0, 0)	0 (0, 0)	0 (0, 0)	0 (0, 0)	0 (0, 0)	0 (0, 0)	0 (0, 0)	0 (0, 0)	1 (1, 1)
Suzhou	Shanxi	North	Female	35 y～	0 (0, 0)	0 (0, 0)	0 (0, 0)	1 (1, 1)	0 (0, 0)	0 (0, 0)	0 (0, 0)	0 (0, 0)	0 (0, 0)	0 (0, 0)	0 (0, 0)	0 (0, 0)	0 (0, 0)	0 (0, 0)	0 (0, 0)	0 (0, 0)	0 (0, 0)	0 (0, 0)	0 (0, 0)	0 (0, 0)	0 (0, 0)	0 (0, 0)	0 (0, 0)	0 (0, 0)	0 (0, 1)	1 (1, 1)	0 (0, 0)	1 (1, 2)
Suzhou	Shanxi	North	Female	40 y～	0 (0, 0)	1 (0, 1)	0 (0, 0)	1 (1, 1)	0 (0, 0)	0 (0, 0)	0 (0, 0)	0 (0, 0)	0 (0, 0)	0 (0, 0)	0 (0, 0)	0 (0, 0)	0 (0, 0)	0 (0, 0)	0 (0, 0)	0 (0, 0)	0 (0, 0)	0 (0, 0)	0 (0, 0)	0 (0, 0)	0 (0, 0)	1 (0, 1)	0 (0, 0)	1 (1, 1)	1 (1, 1)	1 (1, 2)	0 (0, 0)	3 (2, 3)
Suzhou	Shanxi	North	Female	45 y～	1 (0, 1)	1 (1, 1)	0 (0, 0)	1 (1, 2)	0 (0, 0)	0 (0, 0)	0 (0, 0)	0 (0, 0)	0 (0, 0)	0 (0, 1)	0 (0, 0)	1 (1, 1)	0 (0, 0)	0 (0, 0)	0 (0, 0)	0 (0, 0)	0 (0, 0)	0 (0, 0)	0 (0, 0)	0 (0, 0)	1 (1, 1)	1 (1, 1)	0 (0, 0)	2 (1, 2)	1 (1, 2)	2 (2, 3)	0 (0, 1)	4 (4, 5)
Suzhou	Shanxi	North	Female	50 y～	1 (1, 1)	1 (1, 1)	0 (0, 0)	2 (2, 2)	0 (0, 0)	0 (0, 0)	0 (0, 0)	0 (0, 0)	0 (0, 0)	1 (1, 1)	0 (0, 0)	1 (1, 1)	0 (0, 0)	0 (0, 0)	0 (0, 0)	0 (0, 0)	0 (0, 0)	0 (0, 0)	0 (0, 0)	0 (0, 0)	1 (1, 1)	1 (1, 1)	0 (0, 0)	2 (2, 3)	2 (2, 2)	3 (3, 4)	1 (1, 1)	6 (5, 7)
Suzhou	Shanxi	North	Female	55 y～	1 (1, 1)	2 (2, 2)	0 (0, 0)	4 (3, 4)	0 (0, 0)	0 (0, 0)	0 (0, 0)	0 (0, 0)	1 (0, 1)	1 (1, 2)	0 (0, 0)	2 (2, 3)	0 (0, 0)	0 (0, 0)	0 (0, 0)	0 (0, 1)	0 (0, 0)	0 (0, 0)	0 (0, 0)	0 (0, 0)	1 (1, 1)	2 (2, 2)	0 (0, 0)	3 (3, 4)	3 (3, 4)	6 (5, 7)	1 (1, 1)	10 (9, 12)
Suzhou	Shanxi	North	Female	60 y～	1 (1, 1)	2 (2, 2)	0 (0, 0)	4 (3, 4)	0 (0, 0)	0 (0, 0)	0 (0, 0)	1 (0, 1)	1 (1, 1)	1 (1, 2)	0 (0, 0)	2 (2, 3)	0 (0, 0)	0 (0, 0)	0 (0, 0)	0 (0, 1)	0 (0, 0)	0 (0, 0)	0 (0, 0)	0 (0, 0)	1 (1, 2)	2 (2, 3)	0 (0, 1)	4 (4, 5)	4 (3, 4)	6 (5, 7)	1 (1, 1)	11 (10, 13)
Suzhou	Shanxi	North	Female	65 y～	2 (2, 2)	3 (2, 3)	1 (0, 1)	5 (4, 6)	0 (0, 0)	1 (0, 1)	0 (0, 0)	1 (1, 1)	1 (1, 1)	2 (1, 2)	0 (0, 0)	3 (2, 3)	0 (0, 0)	0 (0, 0)	0 (0, 0)	1 (1, 1)	0 (0, 0)	0 (0, 0)	0 (0, 0)	0 (0, 1)	2 (2, 2)	3 (3, 4)	1 (1, 1)	6 (5, 6)	5 (4, 6)	9 (7, 10)	2 (1, 2)	16 (13, 18)
Suzhou	Shanxi	North	Female	70 y～	3 (2, 3)	4 (3, 5)	1 (1, 1)	8 (6, 9)	1 (0, 1)	1 (1, 1)	0 (0, 0)	2 (2, 2)	1 (1, 1)	2 (1, 2)	0 (0, 0)	3 (2, 4)	0 (0, 0)	1 (0, 1)	0 (0, 0)	1 (1, 1)	0 (0, 0)	0 (0, 0)	0 (0, 0)	1 (1, 1)	3 (3, 3)	5 (4, 5)	1 (1, 1)	9 (8, 10)	8 (7, 9)	13 (11, 15)	2 (2, 3)	23 (19, 27)
Suzhou	Shanxi	North	Female	75 y～	4 (3, 5)	6 (5, 7)	1 (1, 1)	12 (10, 14)	1 (1, 1)	2 (2, 2)	0 (0, 0)	3 (3, 4)	1 (1, 2)	2 (2, 3)	0 (0, 0)	4 (3, 5)	1 (1, 1)	1 (1, 2)	0 (0, 0)	2 (2, 3)	0 (0, 0)	1 (1, 1)	0 (0, 0)	1 (1, 1)	5 (4, 5)	7 (6, 8)	1 (1, 2)	13 (12, 15)	12 (10, 14)	20 (17, 23)	4 (3, 4)	36 (30, 42)
Suzhou	Shanxi	North	Female	80 y～	4 (3, 5)	6 (5, 7)	1 (1, 2)	12 (10, 14)	1 (1, 2)	2 (2, 3)	1 (0, 1)	4 (4, 5)	1 (1, 1)	2 (1, 2)	0 (0, 0)	3 (2, 4)	1 (1, 1)	2 (1, 2)	0 (0, 0)	3 (2, 4)	0 (0, 0)	0 (0, 1)	0 (0, 0)	1 (1, 1)	4 (4, 5)	6 (5, 7)	1 (1, 1)	12 (10, 13)	12 (10, 14)	19 (15, 22)	4 (3, 5)	35 (28, 41)
Suzhou	Shanxi	North	Female	85 y～	5 (4, 6)	8 (6, 9)	2 (1, 2)	15 (12, 17)	2 (2, 3)	4 (3, 4)	1 (1, 1)	7 (6, 8)	1 (1, 1)	1 (1, 1)	0 (0, 0)	2 (2, 3)	2 (2, 3)	3 (2, 4)	1 (1, 1)	6 (5, 8)	0 (0, 0)	0 (0, 0)	0 (0, 0)	1 (1, 1)	4 (3, 5)	6 (5, 7)	1 (1, 1)	11 (10, 13)	15 (12, 17)	22 (18, 26)	5 (4, 6)	42 (34, 49)
Taiyuan	Shanxi	North	Male	0 y～	0 (0, 0)	0 (0, 0)	0 (0, 0)	0 (0, 0)	0 (0, 0)	0 (0, 0)	0 (0, 0)	0 (0, 0)	0 (0, 0)	0 (0, 0)	0 (0, 0)	0 (0, 0)	1 (1, 1)	1 (0, 1)	0 (0, 0)	1 (1, 2)	0 (0, 0)	0 (0, 0)	0 (0, 0)	0 (0, 0)	0 (0, 0)	0 (0, 0)	0 (0, 0)	0 (0, 0)	1 (1, 1)	1 (0, 1)	0 (0, 0)	1 (1, 2)
Taiyuan	Shanxi	North	Male	1 y～	0 (0, 0)	0 (0, 0)	0 (0, 0)	0 (0, 0)	0 (0, 0)	0 (0, 0)	0 (0, 0)	0 (0, 0)	0 (0, 0)	0 (0, 0)	0 (0, 0)	0 (0, 0)	1 (1, 1)	1 (0, 1)	0 (0, 0)	1 (1, 2)	0 (0, 0)	0 (0, 0)	0 (0, 0)	0 (0, 0)	0 (0, 0)	0 (0, 0)	0 (0, 0)	0 (0, 0)	1 (1, 1)	1 (0, 1)	0 (0, 0)	1 (1, 2)
Taiyuan	Shanxi	North	Male	5 y～	0 (0, 0)	0 (0, 0)	0 (0, 0)	0 (0, 0)	0 (0, 0)	0 (0, 0)	0 (0, 0)	0 (0, 0)	0 (0, 0)	0 (0, 0)	0 (0, 0)	0 (0, 0)	0 (0, 0)	0 (0, 0)	0 (0, 0)	1 (0, 1)	0 (0, 0)	0 (0, 0)	0 (0, 0)	0 (0, 0)	0 (0, 0)	0 (0, 0)	0 (0, 0)	0 (0, 0)	0 (0, 0)	0 (0, 0)	0 (0, 0)	1 (1, 1)
Taiyuan	Shanxi	North	Male	10 y～	0 (0, 0)	0 (0, 0)	0 (0, 0)	0 (0, 0)	0 (0, 0)	0 (0, 0)	0 (0, 0)	0 (0, 0)	0 (0, 0)	0 (0, 0)	0 (0, 0)	0 (0, 0)	0 (0, 0)	0 (0, 0)	0 (0, 0)	0 (0, 0)	0 (0, 0)	0 (0, 0)	0 (0, 0)	0 (0, 0)	0 (0, 0)	0 (0, 0)	0 (0, 0)	0 (0, 0)	0 (0, 0)	0 (0, 0)	0 (0, 0)	0 (0, 0)
Taiyuan	Shanxi	North	Male	15 y～	1 (1, 1)	1 (1, 1)	0 (0, 0)	2 (1, 2)	0 (0, 0)	0 (0, 0)	0 (0, 0)	0 (0, 0)	0 (0, 0)	0 (0, 0)	0 (0, 0)	0 (0, 0)	0 (0, 0)	0 (0, 0)	0 (0, 0)	0 (0, 0)	0 (0, 0)	0 (0, 0)	0 (0, 0)	0 (0, 0)	0 (0, 0)	0 (0, 0)	0 (0, 0)	1 (1, 1)	1 (1, 1)	1 (1, 1)	0 (0, 0)	3 (2, 3)
Taiyuan	Shanxi	North	Male	20 y～	1 (1, 1)	1 (1, 1)	0 (0, 0)	2 (2, 2)	0 (0, 0)	0 (0, 0)	0 (0, 0)	0 (0, 0)	0 (0, 0)	0 (0, 0)	0 (0, 0)	0 (0, 0)	0 (0, 0)	0 (0, 0)	0 (0, 0)	1 (0, 1)	0 (0, 0)	0 (0, 0)	0 (0, 0)	0 (0, 0)	0 (0, 0)	0 (0, 0)	0 (0, 0)	1 (1, 1)	2 (1, 2)	1 (1, 1)	1 (0, 1)	3 (3, 4)
Taiyuan	Shanxi	North	Male	25 y～	1 (1, 1)	1 (1, 1)	0 (0, 0)	2 (2, 2)	0 (0, 0)	0 (0, 0)	0 (0, 0)	0 (0, 0)	0 (0, 0)	0 (0, 0)	0 (0, 0)	0 (0, 0)	0 (0, 0)	0 (0, 0)	0 (0, 0)	0 (0, 1)	0 (0, 0)	0 (0, 0)	0 (0, 0)	0 (0, 0)	1 (1, 1)	1 (1, 1)	0 (0, 0)	2 (1, 2)	2 (2, 2)	1 (1, 2)	1 (1, 1)	4 (3, 4)
Taiyuan	Shanxi	North	Male	30 y～	2 (2, 3)	2 (2, 2)	1 (1, 1)	5 (5, 6)	0 (0, 0)	0 (0, 0)	0 (0, 0)	0 (0, 0)	0 (0, 0)	0 (0, 0)	0 (0, 0)	0 (0, 1)	0 (0, 1)	0 (0, 0)	0 (0, 0)	1 (1, 1)	0 (0, 0)	0 (0, 0)	0 (0, 0)	0 (0, 0)	2 (2, 2)	1 (1, 2)	1 (1, 1)	4 (3, 4)	5 (4, 6)	4 (3, 4)	2 (1, 2)	11 (9, 12)
Taiyuan	Shanxi	North	Male	35 y～	5 (5, 6)	4 (4, 5)	2 (2, 2)	12 (10, 13)	0 (0, 0)	0 (0, 0)	0 (0, 0)	0 (0, 0)	1 (1, 1)	1 (1, 1)	0 (0, 0)	2 (2, 2)	0 (0, 1)	0 (0, 0)	0 (0, 0)	1 (1, 1)	0 (0, 0)	0 (0, 0)	0 (0, 0)	0 (0, 1)	4 (4, 4)	3 (3, 4)	1 (1, 2)	9 (8, 10)	11 (10, 12)	9 (8, 10)	4 (3, 4)	24 (21, 26)
Taiyuan	Shanxi	North	Male	40 y～	11 (9, 12)	9 (7, 9)	4 (3, 4)	23 (20, 25)	0 (0, 0)	0 (0, 0)	0 (0, 0)	0 (0, 1)	2 (1, 2)	1 (1, 1)	1 (0, 1)	3 (3, 4)	1 (1, 1)	1 (1, 1)	0 (0, 0)	2 (1, 2)	0 (0, 0)	0 (0, 0)	0 (0, 0)	1 (1, 1)	8 (7, 9)	7 (6, 7)	3 (3, 3)	18 (16, 20)	22 (19, 25)	17 (15, 19)	8 (7, 8)	47 (41, 52)
Taiyuan	Shanxi	North	Male	45 y～	13 (12, 15)	10 (8, 11)	5 (4, 6)	28 (25, 31)	1 (0, 1)	0 (0, 0)	0 (0, 0)	1 (1, 1)	3 (2, 4)	2 (1, 2)	1 (1, 1)	6 (5, 7)	1 (1, 1)	0 (0, 1)	0 (0, 0)	2 (1, 2)	0 (0, 1)	0 (0, 0)	0 (0, 0)	1 (1, 1)	13 (11, 14)	9 (8, 10)	5 (4, 5)	27 (24, 30)	31 (27, 35)	22 (19, 25)	12 (10, 13)	65 (56, 73)
Taiyuan	Shanxi	North	Male	50 y～	16 (14, 17)	11 (10, 13)	6 (5, 7)	33 (29, 36)	1 (1, 1)	1 (1, 1)	0 (0, 0)	2 (2, 2)	6 (5, 8)	4 (3, 5)	2 (2, 3)	12 (9, 15)	1 (1, 2)	1 (1, 1)	0 (0, 1)	2 (2, 3)	1 (0, 1)	0 (0, 0)	0 (0, 0)	1 (1, 1)	16 (14, 18)	11 (10, 13)	6 (5, 7)	33 (29, 37)	41 (34, 46)	28 (24, 32)	15 (13, 17)	84 (72, 95)
Taiyuan	Shanxi	North	Male	55 y～	27 (23, 30)	20 (17, 22)	10 (9, 11)	57 (49, 63)	3 (3, 3)	2 (2, 2)	1 (1, 1)	6 (5, 7)	15 (11, 18)	9 (7, 11)	5 (4, 6)	29 (22, 36)	2 (2, 3)	1 (1, 2)	1 (1, 1)	4 (3, 5)	1 (1, 2)	1 (1, 1)	0 (0, 1)	3 (2, 3)	27 (24, 31)	20 (17, 22)	11 (9, 12)	58 (50, 65)	76 (64, 86)	53 (44, 60)	29 (24, 32)	157 (132, 178)
Taiyuan	Shanxi	North	Male	60 y～	22 (18, 24)	17 (14, 18)	8 (7, 9)	46 (39, 51)	5 (4, 5)	3 (2, 3)	2 (1, 2)	9 (8, 10)	18 (13, 22)	10 (8, 13)	6 (5, 7)	34 (26, 42)	3 (2, 3)	2 (1, 2)	1 (1, 1)	5 (4, 6)	1 (1, 1)	1 (1, 1)	0 (0, 0)	2 (2, 3)	25 (22, 29)	20 (17, 22)	9 (8, 10)	54 (47, 61)	73 (61, 84)	52 (43, 59)	26 (22, 30)	151 (126, 173)
Taiyuan	Shanxi	North	Male	65 y～	22 (18, 24)	17 (14, 18)	8 (7, 9)	46 (39, 51)	7 (6, 8)	4 (3, 4)	2 (2, 3)	13 (11, 15)	20 (15, 24)	12 (9, 14)	7 (5, 8)	38 (29, 46)	4 (3, 5)	2 (2, 3)	1 (1, 2)	7 (6, 9)	1 (1, 2)	1 (1, 1)	0 (0, 1)	3 (2, 3)	27 (24, 31)	21 (18, 24)	10 (9, 11)	59 (51, 66)	80 (66, 92)	56 (47, 64)	28 (24, 33)	165 (137, 189)
Taiyuan	Shanxi	North	Male	70 y～	26 (21, 29)	20 (16, 23)	9 (8, 11)	55 (46, 63)	13 (11, 15)	7 (6, 9)	4 (4, 5)	25 (21, 28)	22 (17, 27)	13 (10, 16)	8 (6, 9)	43 (32, 52)	6 (4, 7)	3 (3, 4)	2 (2, 2)	11 (9, 13)	2 (1, 2)	1 (1, 1)	1 (1, 1)	4 (3, 4)	36 (31, 40)	28 (24, 31)	13 (11, 14)	76 (66, 85)	104 (86, 120)	73 (60, 83)	37 (30, 42)	213 (176, 246)
Taiyuan	Shanxi	North	Male	75 y～	31 (25, 35)	24 (20, 27)	11 (9, 13)	66 (54, 75)	20 (17, 23)	12 (10, 14)	7 (6, 8)	39 (33, 45)	22 (16, 26)	13 (10, 16)	7 (6, 9)	42 (32, 51)	9 (7, 11)	5 (4, 6)	3 (2, 4)	17 (13, 21)	2 (2, 3)	1 (1, 2)	1 (1, 1)	4 (4, 5)	41 (35, 46)	32 (27, 36)	15 (13, 17)	88 (75, 98)	125 (103, 144)	87 (72, 100)	44 (36, 51)	256 (211, 295)
Taiyuan	Shanxi	North	Male	80 y～	23 (19, 26)	18 (15, 21)	8 (7, 9)	50 (40, 57)	17 (14, 19)	13 (11, 15)	6 (5, 7)	37 (31, 42)	10 (8, 13)	8 (6, 10)	4 (3, 5)	23 (17, 27)	9 (7, 11)	7 (5, 8)	3 (3, 4)	19 (15, 23)	1 (1, 2)	1 (1, 1)	1 (0, 1)	3 (2, 3)	28 (24, 31)	22 (19, 25)	10 (8, 11)	60 (51, 67)	88 (73, 102)	70 (58, 81)	32 (26, 37)	190 (157, 220)
Taiyuan	Shanxi	North	Male	85 y～	21 (17, 24)	17 (14, 19)	7 (6, 8)	46 (37, 52)	17 (15, 20)	14 (12, 16)	6 (5, 7)	37 (32, 43)	6 (5, 8)	5 (4, 6)	2 (2, 3)	14 (10, 16)	13 (11, 17)	11 (8, 13)	5 (4, 6)	29 (23, 36)	1 (1, 1)	1 (1, 1)	0 (0, 0)	2 (2, 3)	19 (16, 21)	15 (13, 17)	7 (6, 7)	41 (35, 46)	78 (64, 91)	62 (51, 72)	28 (23, 33)	169 (139, 196)
Taiyuan	Shanxi	North	Female	0 y～	0 (0, 0)	0 (0, 0)	0 (0, 0)	0 (0, 0)	0 (0, 0)	0 (0, 0)	0 (0, 0)	0 (0, 0)	0 (0, 0)	0 (0, 0)	0 (0, 0)	0 (0, 0)	1 (1, 1)	1 (0, 1)	0 (0, 0)	1 (1, 2)	0 (0, 0)	0 (0, 0)	0 (0, 0)	0 (0, 0)	0 (0, 0)	0 (0, 0)	0 (0, 0)	0 (0, 0)	1 (1, 1)	1 (0, 1)	0 (0, 0)	1 (1, 2)
Taiyuan	Shanxi	North	Female	1 y～	0 (0, 0)	0 (0, 0)	0 (0, 0)	0 (0, 0)	0 (0, 0)	0 (0, 0)	0 (0, 0)	0 (0, 0)	0 (0, 0)	0 (0, 0)	0 (0, 0)	0 (0, 0)	1 (0, 1)	0 (0, 0)	0 (0, 0)	1 (1, 1)	0 (0, 0)	0 (0, 0)	0 (0, 0)	0 (0, 0)	0 (0, 0)	0 (0, 0)	0 (0, 0)	0 (0, 0)	1 (0, 1)	0 (0, 0)	0 (0, 0)	1 (1, 1)
Taiyuan	Shanxi	North	Female	5 y～	0 (0, 0)	0 (0, 0)	0 (0, 0)	0 (0, 0)	0 (0, 0)	0 (0, 0)	0 (0, 0)	0 (0, 0)	0 (0, 0)	0 (0, 0)	0 (0, 0)	0 (0, 0)	0 (0, 0)	0 (0, 0)	0 (0, 0)	0 (0, 1)	0 (0, 0)	0 (0, 0)	0 (0, 0)	0 (0, 0)	0 (0, 0)	0 (0, 0)	0 (0, 0)	0 (0, 0)	0 (0, 0)	0 (0, 0)	0 (0, 0)	0 (0, 1)
Taiyuan	Shanxi	North	Female	10 y～	0 (0, 0)	0 (0, 0)	0 (0, 0)	0 (0, 0)	0 (0, 0)	0 (0, 0)	0 (0, 0)	0 (0, 0)	0 (0, 0)	0 (0, 0)	0 (0, 0)	0 (0, 0)	0 (0, 0)	0 (0, 0)	0 (0, 0)	0 (0, 0)	0 (0, 0)	0 (0, 0)	0 (0, 0)	0 (0, 0)	0 (0, 0)	0 (0, 0)	0 (0, 0)	0 (0, 0)	0 (0, 0)	0 (0, 0)	0 (0, 0)	0 (0, 0)
Taiyuan	Shanxi	North	Female	15 y～	0 (0, 0)	0 (0, 0)	0 (0, 0)	1 (1, 1)	0 (0, 0)	0 (0, 0)	0 (0, 0)	0 (0, 0)	0 (0, 0)	0 (0, 0)	0 (0, 0)	0 (0, 0)	0 (0, 0)	0 (0, 0)	0 (0, 0)	0 (0, 0)	0 (0, 0)	0 (0, 0)	0 (0, 0)	0 (0, 0)	0 (0, 0)	0 (0, 0)	0 (0, 0)	0 (0, 1)	1 (1, 1)	1 (1, 1)	0 (0, 0)	2 (1, 2)
Taiyuan	Shanxi	North	Female	20 y～	0 (0, 0)	0 (0, 0)	0 (0, 0)	0 (0, 0)	0 (0, 0)	0 (0, 0)	0 (0, 0)	0 (0, 0)	0 (0, 0)	0 (0, 0)	0 (0, 0)	0 (0, 0)	0 (0, 0)	0 (0, 0)	0 (0, 0)	0 (0, 0)	0 (0, 0)	0 (0, 0)	0 (0, 0)	0 (0, 0)	0 (0, 0)	0 (0, 0)	0 (0, 0)	0 (0, 0)	0 (0, 0)	0 (0, 1)	0 (0, 0)	1 (1, 1)
Taiyuan	Shanxi	North	Female	25 y～	0 (0, 0)	0 (0, 0)	0 (0, 0)	1 (1, 1)	0 (0, 0)	0 (0, 0)	0 (0, 0)	0 (0, 0)	0 (0, 0)	0 (0, 0)	0 (0, 0)	0 (0, 0)	0 (0, 0)	0 (0, 0)	0 (0, 0)	0 (0, 0)	0 (0, 0)	0 (0, 0)	0 (0, 0)	0 (0, 0)	0 (0, 0)	0 (0, 0)	0 (0, 0)	1 (1, 1)	1 (1, 1)	1 (1, 1)	0 (0, 0)	1 (1, 1)
Taiyuan	Shanxi	North	Female	30 y～	0 (0, 0)	0 (0, 1)	0 (0, 0)	1 (1, 1)	0 (0, 0)	0 (0, 0)	0 (0, 0)	0 (0, 0)	0 (0, 0)	0 (0, 0)	0 (0, 0)	0 (0, 0)	0 (0, 0)	0 (0, 0)	0 (0, 0)	0 (0, 0)	0 (0, 0)	0 (0, 0)	0 (0, 0)	0 (0, 0)	1 (1, 1)	1 (1, 1)	0 (0, 0)	1 (1, 1)	1 (1, 1)	1 (1, 1)	0 (0, 0)	3 (2, 3)
Taiyuan	Shanxi	North	Female	35 y～	1 (1, 1)	1 (1, 2)	0 (0, 0)	3 (3, 3)	0 (0, 0)	0 (0, 0)	0 (0, 0)	0 (0, 0)	0 (0, 0)	1 (0, 1)	0 (0, 0)	1 (1, 1)	0 (0, 0)	0 (0, 0)	0 (0, 0)	1 (0, 1)	0 (0, 0)	0 (0, 0)	0 (0, 0)	0 (0, 0)	1 (1, 1)	1 (1, 1)	0 (0, 0)	2 (1, 2)	3 (2, 3)	3 (3, 4)	1 (1, 1)	7 (6, 7)
Taiyuan	Shanxi	North	Female	40 y～	2 (2, 2)	2 (2, 2)	0 (0, 1)	5 (4, 5)	0 (0, 0)	0 (0, 0)	0 (0, 0)	0 (0, 0)	1 (0, 1)	1 (1, 1)	0 (0, 0)	2 (1, 2)	0 (0, 0)	0 (0, 0)	0 (0, 0)	0 (0, 1)	0 (0, 0)	0 (0, 0)	0 (0, 0)	0 (0, 0)	2 (2, 2)	2 (2, 3)	1 (0, 1)	5 (4, 5)	5 (4, 6)	6 (5, 6)	1 (1, 1)	12 (10, 14)
Taiyuan	Shanxi	North	Female	45 y～	3 (2, 3)	3 (3, 3)	1 (1, 1)	7 (6, 7)	0 (0, 0)	0 (0, 0)	0 (0, 0)	0 (0, 0)	1 (1, 2)	2 (1, 2)	0 (0, 0)	4 (3, 5)	1 (0, 1)	1 (1, 1)	0 (0, 0)	1 (1, 2)	0 (0, 0)	0 (0, 0)	0 (0, 0)	0 (0, 0)	3 (3, 4)	4 (3, 4)	1 (1, 1)	8 (7, 9)	8 (7, 10)	10 (8, 11)	2 (2, 2)	20 (17, 23)
Taiyuan	Shanxi	North	Female	50 y～	4 (3, 4)	4 (4, 5)	1 (1, 1)	9 (8, 10)	0 (0, 0)	0 (0, 0)	0 (0, 0)	0 (0, 0)	2 (1, 2)	3 (2, 3)	1 (0, 1)	5 (4, 6)	0 (0, 0)	0 (0, 1)	0 (0, 0)	1 (1, 1)	0 (0, 0)	0 (0, 0)	0 (0, 0)	1 (1, 1)	5 (4, 5)	5 (4, 6)	1 (1, 1)	11 (10, 12)	12 (10, 13)	13 (11, 15)	3 (2, 3)	27 (23, 31)
Taiyuan	Shanxi	North	Female	55 y～	7 (6, 8)	8 (7, 8)	2 (1, 2)	17 (14, 18)	1 (1, 1)	1 (1, 1)	0 (0, 0)	2 (2, 2)	4 (3, 5)	5 (4, 6)	1 (1, 1)	10 (8, 12)	1 (1, 1)	1 (1, 1)	0 (0, 0)	2 (2, 2)	0 (0, 0)	1 (0, 1)	0 (0, 0)	1 (1, 1)	7 (6, 8)	7 (6, 8)	2 (1, 2)	16 (14, 18)	20 (17, 22)	23 (19, 26)	5 (4, 6)	47 (40, 54)
Taiyuan	Shanxi	North	Female	60 y～	8 (7, 8)	8 (7, 9)	2 (1, 2)	18 (15, 19)	1 (1, 1)	1 (1, 1)	0 (0, 0)	2 (2, 3)	4 (3, 5)	5 (4, 6)	1 (1, 1)	10 (8, 12)	1 (1, 1)	1 (1, 1)	0 (0, 0)	2 (2, 2)	1 (0, 1)	1 (1, 1)	0 (0, 0)	1 (1, 2)	9 (7, 10)	9 (8, 10)	2 (2, 2)	20 (17, 22)	23 (19, 26)	26 (21, 29)	5 (4, 6)	54 (45, 61)
Taiyuan	Shanxi	North	Female	65 y～	11 (9, 12)	11 (10, 13)	2 (2, 3)	24 (21, 27)	2 (2, 2)	2 (2, 3)	0 (0, 0)	4 (4, 5)	5 (4, 6)	6 (5, 8)	1 (1, 1)	12 (9, 15)	1 (1, 2)	2 (1, 2)	0 (0, 0)	3 (3, 4)	1 (1, 1)	1 (1, 1)	0 (0, 0)	2 (2, 2)	12 (10, 13)	12 (11, 14)	3 (2, 3)	27 (23, 30)	31 (26, 35)	35 (29, 40)	7 (6, 8)	73 (61, 83)
Taiyuan	Shanxi	North	Female	70 y～	16 (13, 18)	17 (14, 19)	4 (3, 4)	36 (30, 41)	3 (3, 4)	4 (4, 5)	1 (1, 1)	8 (7, 10)	6 (4, 7)	7 (6, 9)	1 (1, 2)	14 (11, 18)	2 (2, 3)	3 (2, 3)	0 (0, 1)	5 (4, 7)	1 (1, 1)	2 (1, 2)	0 (0, 0)	3 (3, 4)	18 (15, 20)	19 (17, 21)	4 (4, 5)	41 (36, 46)	46 (39, 53)	52 (43, 60)	11 (9, 12)	109 (91, 125)
Taiyuan	Shanxi	North	Female	75 y～	24 (20, 27)	26 (21, 30)	5 (5, 6)	56 (46, 63)	7 (6, 8)	8 (7, 9)	2 (1, 2)	16 (14, 19)	8 (6, 9)	9 (7, 11)	2 (1, 2)	19 (14, 23)	4 (4, 5)	6 (4, 7)	1 (1, 1)	11 (9, 14)	2 (2, 2)	3 (2, 3)	0 (0, 1)	5 (4, 6)	27 (24, 31)	30 (25, 33)	6 (5, 7)	63 (54, 71)	72 (60, 82)	81 (67, 93)	17 (14, 19)	170 (141, 195)
Taiyuan	Shanxi	North	Female	80 y～	25 (20, 28)	26 (21, 30)	6 (5, 7)	56 (46, 64)	9 (7, 10)	10 (8, 11)	2 (2, 3)	21 (18, 24)	6 (4, 7)	6 (5, 8)	2 (1, 2)	14 (10, 17)	6 (5, 8)	7 (5, 9)	2 (1, 2)	15 (12, 18)	2 (1, 2)	2 (1, 2)	0 (0, 1)	4 (3, 4)	24 (21, 27)	26 (22, 29)	6 (5, 6)	56 (47, 62)	71 (58, 82)	76 (63, 88)	18 (15, 20)	165 (136, 191)
Taiyuan	Shanxi	North	Female	85 y～	30 (24, 35)	32 (26, 37)	7 (6, 8)	69 (56, 80)	14 (12, 16)	16 (13, 18)	4 (3, 4)	33 (28, 38)	4 (3, 5)	5 (3, 6)	1 (1, 1)	10 (7, 12)	12 (10, 15)	14 (11, 17)	3 (3, 4)	29 (23, 36)	1 (1, 2)	2 (1, 2)	0 (0, 0)	3 (3, 4)	24 (20, 27)	25 (21, 28)	6 (5, 6)	55 (46, 62)	86 (70, 100)	92 (76, 107)	21 (18, 25)	200 (163, 232)
Xinzhou	Shanxi	North	Male	0 y～	0 (0, 0)	0 (0, 0)	0 (0, 0)	0 (0, 0)	0 (0, 0)	0 (0, 0)	0 (0, 0)	0 (0, 0)	0 (0, 0)	0 (0, 0)	0 (0, 0)	0 (0, 0)	0 (0, 0)	0 (0, 0)	0 (0, 0)	0 (0, 0)	0 (0, 0)	0 (0, 0)	0 (0, 0)	0 (0, 0)	0 (0, 0)	0 (0, 0)	0 (0, 0)	0 (0, 0)	0 (0, 0)	0 (0, 0)	0 (0, 0)	0 (0, 0)
Xinzhou	Shanxi	North	Male	1 y～	0 (0, 0)	0 (0, 0)	0 (0, 0)	0 (0, 0)	0 (0, 0)	0 (0, 0)	0 (0, 0)	0 (0, 0)	0 (0, 0)	0 (0, 0)	0 (0, 0)	0 (0, 0)	0 (0, 0)	0 (0, 0)	0 (0, 0)	0 (0, 0)	0 (0, 0)	0 (0, 0)	0 (0, 0)	0 (0, 0)	0 (0, 0)	0 (0, 0)	0 (0, 0)	0 (0, 0)	0 (0, 0)	0 (0, 0)	0 (0, 0)	0 (0, 0)
Xinzhou	Shanxi	North	Male	5 y～	0 (0, 0)	0 (0, 0)	0 (0, 0)	0 (0, 0)	0 (0, 0)	0 (0, 0)	0 (0, 0)	0 (0, 0)	0 (0, 0)	0 (0, 0)	0 (0, 0)	0 (0, 0)	0 (0, 0)	0 (0, 0)	0 (0, 0)	0 (0, 0)	0 (0, 0)	0 (0, 0)	0 (0, 0)	0 (0, 0)	0 (0, 0)	0 (0, 0)	0 (0, 0)	0 (0, 0)	0 (0, 0)	0 (0, 0)	0 (0, 0)	0 (0, 0)
Xinzhou	Shanxi	North	Male	10 y～	0 (0, 0)	0 (0, 0)	0 (0, 0)	0 (0, 0)	0 (0, 0)	0 (0, 0)	0 (0, 0)	0 (0, 0)	0 (0, 0)	0 (0, 0)	0 (0, 0)	0 (0, 0)	0 (0, 0)	0 (0, 0)	0 (0, 0)	0 (0, 0)	0 (0, 0)	0 (0, 0)	0 (0, 0)	0 (0, 0)	0 (0, 0)	0 (0, 0)	0 (0, 0)	0 (0, 0)	0 (0, 0)	0 (0, 0)	0 (0, 0)	0 (0, 0)
Xinzhou	Shanxi	North	Male	15 y～	0 (0, 0)	0 (0, 0)	0 (0, 0)	0 (0, 0)	0 (0, 0)	0 (0, 0)	0 (0, 0)	0 (0, 0)	0 (0, 0)	0 (0, 0)	0 (0, 0)	0 (0, 0)	0 (0, 0)	0 (0, 0)	0 (0, 0)	0 (0, 0)	0 (0, 0)	0 (0, 0)	0 (0, 0)	0 (0, 0)	0 (0, 0)	0 (0, 0)	0 (0, 0)	0 (0, 0)	0 (0, 0)	0 (0, 0)	0 (0, 0)	0 (0, 1)
Xinzhou	Shanxi	North	Male	20 y～	0 (0, 0)	0 (0, 0)	0 (0, 0)	0 (0, 0)	0 (0, 0)	0 (0, 0)	0 (0, 0)	0 (0, 0)	0 (0, 0)	0 (0, 0)	0 (0, 0)	0 (0, 0)	0 (0, 0)	0 (0, 0)	0 (0, 0)	0 (0, 0)	0 (0, 0)	0 (0, 0)	0 (0, 0)	0 (0, 0)	0 (0, 0)	0 (0, 0)	0 (0, 0)	0 (0, 0)	0 (0, 0)	0 (0, 0)	0 (0, 0)	1 (1, 1)
Xinzhou	Shanxi	North	Male	25 y～	0 (0, 0)	0 (0, 0)	0 (0, 0)	0 (0, 0)	0 (0, 0)	0 (0, 0)	0 (0, 0)	0 (0, 0)	0 (0, 0)	0 (0, 0)	0 (0, 0)	0 (0, 0)	0 (0, 0)	0 (0, 0)	0 (0, 0)	0 (0, 0)	0 (0, 0)	0 (0, 0)	0 (0, 0)	0 (0, 0)	0 (0, 0)	0 (0, 0)	0 (0, 0)	0 (0, 0)	0 (0, 0)	0 (0, 0)	0 (0, 0)	1 (1, 1)
Xinzhou	Shanxi	North	Male	30 y～	0 (0, 0)	0 (0, 0)	0 (0, 0)	1 (1, 1)	0 (0, 0)	0 (0, 0)	0 (0, 0)	0 (0, 0)	0 (0, 0)	0 (0, 0)	0 (0, 0)	0 (0, 0)	0 (0, 0)	0 (0, 0)	0 (0, 0)	0 (0, 0)	0 (0, 0)	0 (0, 0)	0 (0, 0)	0 (0, 0)	0 (0, 0)	0 (0, 0)	0 (0, 0)	1 (1, 1)	1 (1, 1)	1 (1, 1)	0 (0, 0)	2 (2, 2)
Xinzhou	Shanxi	North	Male	35 y～	1 (1, 1)	1 (1, 1)	0 (0, 0)	2 (2, 2)	0 (0, 0)	0 (0, 0)	0 (0, 0)	0 (0, 0)	0 (0, 0)	0 (0, 0)	0 (0, 0)	0 (0, 0)	0 (0, 0)	0 (0, 0)	0 (0, 0)	0 (0, 0)	0 (0, 0)	0 (0, 0)	0 (0, 0)	0 (0, 0)	1 (1, 1)	1 (1, 1)	0 (0, 0)	2 (1, 2)	2 (2, 2)	2 (1, 2)	1 (1, 1)	4 (4, 5)
Xinzhou	Shanxi	North	Male	40 y～	2 (1, 2)	2 (1, 2)	1 (1, 1)	4 (3, 4)	0 (0, 0)	0 (0, 0)	0 (0, 0)	0 (0, 0)	0 (0, 0)	0 (0, 0)	0 (0, 0)	1 (0, 1)	0 (0, 0)	0 (0, 0)	0 (0, 0)	0 (0, 0)	0 (0, 0)	0 (0, 0)	0 (0, 0)	0 (0, 0)	1 (1, 1)	1 (1, 1)	1 (1, 1)	3 (3, 4)	4 (3, 4)	3 (3, 4)	2 (1, 2)	8 (7, 9)
Xinzhou	Shanxi	North	Male	45 y～	2 (2, 2)	2 (2, 2)	1 (1, 1)	5 (4, 6)	0 (0, 0)	0 (0, 0)	0 (0, 0)	0 (0, 0)	0 (0, 1)	0 (0, 0)	0 (0, 0)	1 (1, 1)	0 (0, 0)	0 (0, 0)	0 (0, 0)	0 (0, 0)	0 (0, 0)	0 (0, 0)	0 (0, 0)	0 (0, 0)	2 (2, 2)	2 (1, 2)	1 (1, 1)	5 (4, 5)	5 (4, 6)	4 (4, 5)	3 (2, 3)	12 (10, 13)
Xinzhou	Shanxi	North	Male	50 y～	3 (2, 3)	2 (2, 2)	1 (1, 1)	6 (5, 7)	0 (0, 0)	0 (0, 0)	0 (0, 0)	0 (0, 0)	1 (1, 1)	1 (1, 1)	0 (0, 1)	2 (2, 3)	0 (0, 0)	0 (0, 0)	0 (0, 0)	0 (0, 1)	0 (0, 0)	0 (0, 0)	0 (0, 0)	0 (0, 0)	2 (2, 3)	2 (2, 2)	1 (1, 1)	6 (5, 7)	6 (5, 7)	5 (4, 6)	3 (3, 4)	15 (13, 17)
Xinzhou	Shanxi	North	Male	55 y～	4 (4, 5)	4 (3, 4)	2 (2, 2)	10 (9, 11)	0 (0, 1)	0 (0, 0)	0 (0, 0)	1 (1, 1)	2 (2, 3)	2 (1, 2)	1 (1, 1)	5 (4, 6)	0 (0, 0)	0 (0, 0)	0 (0, 0)	1 (1, 1)	0 (0, 0)	0 (0, 0)	0 (0, 0)	0 (0, 1)	4 (4, 5)	4 (3, 4)	2 (2, 3)	10 (9, 12)	12 (10, 14)	10 (8, 11)	6 (5, 7)	28 (23, 32)
Xinzhou	Shanxi	North	Male	60 y～	3 (3, 4)	3 (3, 3)	2 (1, 2)	8 (7, 9)	1 (1, 1)	1 (0, 1)	0 (0, 0)	2 (1, 2)	3 (2, 3)	2 (2, 2)	1 (1, 1)	6 (5, 7)	0 (0, 1)	0 (0, 0)	0 (0, 0)	1 (1, 1)	0 (0, 0)	0 (0, 0)	0 (0, 0)	0 (0, 0)	4 (3, 5)	4 (3, 4)	2 (2, 2)	10 (8, 11)	12 (10, 13)	10 (8, 11)	5 (5, 6)	27 (22, 31)
Xinzhou	Shanxi	North	Male	65 y～	3 (3, 4)	3 (3, 3)	2 (1, 2)	8 (7, 9)	1 (1, 1)	1 (1, 1)	0 (0, 1)	2 (2, 3)	3 (2, 4)	2 (2, 3)	1 (1, 2)	7 (5, 8)	1 (0, 1)	0 (0, 1)	0 (0, 0)	1 (1, 2)	0 (0, 0)	0 (0, 0)	0 (0, 0)	0 (0, 1)	4 (4, 5)	4 (3, 4)	2 (2, 2)	10 (9, 12)	13 (10, 15)	10 (9, 12)	6 (5, 7)	29 (24, 33)
Xinzhou	Shanxi	North	Male	70 y～	4 (3, 5)	4 (3, 4)	2 (2, 2)	10 (8, 11)	2 (2, 2)	1 (1, 2)	1 (1, 1)	4 (4, 5)	4 (3, 4)	2 (2, 3)	2 (1, 2)	8 (6, 9)	1 (1, 1)	1 (0, 1)	0 (0, 0)	2 (1, 2)	0 (0, 0)	0 (0, 0)	0 (0, 0)	1 (1, 1)	6 (5, 6)	5 (4, 6)	3 (2, 3)	13 (11, 15)	16 (13, 19)	13 (11, 16)	8 (6, 9)	37 (31, 43)
Xinzhou	Shanxi	North	Male	75 y～	5 (4, 6)	4 (4, 5)	2 (2, 3)	12 (9, 13)	3 (3, 4)	2 (2, 3)	1 (1, 2)	7 (6, 8)	3 (3, 4)	2 (2, 3)	1 (1, 2)	7 (6, 9)	1 (1, 2)	1 (1, 1)	1 (0, 1)	3 (2, 4)	0 (0, 0)	0 (0, 0)	0 (0, 0)	1 (1, 1)	6 (5, 7)	6 (5, 6)	3 (3, 4)	15 (13, 17)	20 (16, 23)	16 (13, 19)	9 (8, 11)	45 (37, 52)
Xinzhou	Shanxi	North	Male	80 y～	4 (3, 4)	3 (3, 4)	2 (1, 2)	9 (7, 10)	3 (2, 3)	3 (2, 3)	1 (1, 1)	6 (5, 7)	2 (1, 2)	2 (1, 2)	1 (1, 1)	4 (3, 5)	1 (1, 2)	1 (1, 2)	1 (0, 1)	3 (3, 4)	0 (0, 0)	0 (0, 0)	0 (0, 0)	1 (0, 1)	4 (4, 5)	4 (4, 5)	2 (2, 2)	11 (9, 12)	14 (11, 16)	13 (11, 16)	6 (5, 7)	34 (28, 39)
Xinzhou	Shanxi	North	Male	85 y～	3 (3, 4)	3 (3, 4)	2 (1, 2)	8 (7, 9)	3 (2, 3)	3 (2, 3)	1 (1, 1)	7 (6, 8)	1 (1, 1)	1 (1, 1)	0 (0, 1)	2 (2, 3)	2 (2, 3)	2 (2, 3)	1 (1, 1)	5 (4, 6)	0 (0, 0)	0 (0, 0)	0 (0, 0)	0 (0, 0)	3 (3, 3)	3 (2, 3)	1 (1, 2)	7 (6, 8)	12 (10, 14)	12 (10, 14)	6 (5, 7)	30 (24, 35)
Xinzhou	Shanxi	North	Female	0 y～	0 (0, 0)	0 (0, 0)	0 (0, 0)	0 (0, 0)	0 (0, 0)	0 (0, 0)	0 (0, 0)	0 (0, 0)	0 (0, 0)	0 (0, 0)	0 (0, 0)	0 (0, 0)	0 (0, 0)	0 (0, 0)	0 (0, 0)	0 (0, 0)	0 (0, 0)	0 (0, 0)	0 (0, 0)	0 (0, 0)	0 (0, 0)	0 (0, 0)	0 (0, 0)	0 (0, 0)	0 (0, 0)	0 (0, 0)	0 (0, 0)	0 (0, 0)
Xinzhou	Shanxi	North	Female	1 y～	0 (0, 0)	0 (0, 0)	0 (0, 0)	0 (0, 0)	0 (0, 0)	0 (0, 0)	0 (0, 0)	0 (0, 0)	0 (0, 0)	0 (0, 0)	0 (0, 0)	0 (0, 0)	0 (0, 0)	0 (0, 0)	0 (0, 0)	0 (0, 0)	0 (0, 0)	0 (0, 0)	0 (0, 0)	0 (0, 0)	0 (0, 0)	0 (0, 0)	0 (0, 0)	0 (0, 0)	0 (0, 0)	0 (0, 0)	0 (0, 0)	0 (0, 0)
Xinzhou	Shanxi	North	Female	5 y～	0 (0, 0)	0 (0, 0)	0 (0, 0)	0 (0, 0)	0 (0, 0)	0 (0, 0)	0 (0, 0)	0 (0, 0)	0 (0, 0)	0 (0, 0)	0 (0, 0)	0 (0, 0)	0 (0, 0)	0 (0, 0)	0 (0, 0)	0 (0, 0)	0 (0, 0)	0 (0, 0)	0 (0, 0)	0 (0, 0)	0 (0, 0)	0 (0, 0)	0 (0, 0)	0 (0, 0)	0 (0, 0)	0 (0, 0)	0 (0, 0)	0 (0, 0)
Xinzhou	Shanxi	North	Female	10 y～	0 (0, 0)	0 (0, 0)	0 (0, 0)	0 (0, 0)	0 (0, 0)	0 (0, 0)	0 (0, 0)	0 (0, 0)	0 (0, 0)	0 (0, 0)	0 (0, 0)	0 (0, 0)	0 (0, 0)	0 (0, 0)	0 (0, 0)	0 (0, 0)	0 (0, 0)	0 (0, 0)	0 (0, 0)	0 (0, 0)	0 (0, 0)	0 (0, 0)	0 (0, 0)	0 (0, 0)	0 (0, 0)	0 (0, 0)	0 (0, 0)	0 (0, 0)
Xinzhou	Shanxi	North	Female	15 y～	0 (0, 0)	0 (0, 0)	0 (0, 0)	0 (0, 0)	0 (0, 0)	0 (0, 0)	0 (0, 0)	0 (0, 0)	0 (0, 0)	0 (0, 0)	0 (0, 0)	0 (0, 0)	0 (0, 0)	0 (0, 0)	0 (0, 0)	0 (0, 0)	0 (0, 0)	0 (0, 0)	0 (0, 0)	0 (0, 0)	0 (0, 0)	0 (0, 0)	0 (0, 0)	0 (0, 0)	0 (0, 0)	0 (0, 0)	0 (0, 0)	0 (0, 0)
Xinzhou	Shanxi	North	Female	20 y～	0 (0, 0)	0 (0, 0)	0 (0, 0)	0 (0, 0)	0 (0, 0)	0 (0, 0)	0 (0, 0)	0 (0, 0)	0 (0, 0)	0 (0, 0)	0 (0, 0)	0 (0, 0)	0 (0, 0)	0 (0, 0)	0 (0, 0)	0 (0, 0)	0 (0, 0)	0 (0, 0)	0 (0, 0)	0 (0, 0)	0 (0, 0)	0 (0, 0)	0 (0, 0)	0 (0, 0)	0 (0, 0)	0 (0, 0)	0 (0, 0)	0 (0, 0)
Xinzhou	Shanxi	North	Female	25 y～	0 (0, 0)	0 (0, 0)	0 (0, 0)	0 (0, 0)	0 (0, 0)	0 (0, 0)	0 (0, 0)	0 (0, 0)	0 (0, 0)	0 (0, 0)	0 (0, 0)	0 (0, 0)	0 (0, 0)	0 (0, 0)	0 (0, 0)	0 (0, 0)	0 (0, 0)	0 (0, 0)	0 (0, 0)	0 (0, 0)	0 (0, 0)	0 (0, 0)	0 (0, 0)	0 (0, 0)	0 (0, 0)	0 (0, 0)	0 (0, 0)	0 (0, 0)
Xinzhou	Shanxi	North	Female	30 y～	0 (0, 0)	0 (0, 0)	0 (0, 0)	0 (0, 0)	0 (0, 0)	0 (0, 0)	0 (0, 0)	0 (0, 0)	0 (0, 0)	0 (0, 0)	0 (0, 0)	0 (0, 0)	0 (0, 0)	0 (0, 0)	0 (0, 0)	0 (0, 0)	0 (0, 0)	0 (0, 0)	0 (0, 0)	0 (0, 0)	0 (0, 0)	0 (0, 0)	0 (0, 0)	0 (0, 0)	0 (0, 0)	0 (0, 0)	0 (0, 0)	1 (0, 1)
Xinzhou	Shanxi	North	Female	35 y～	0 (0, 0)	0 (0, 0)	0 (0, 0)	1 (0, 1)	0 (0, 0)	0 (0, 0)	0 (0, 0)	0 (0, 0)	0 (0, 0)	0 (0, 0)	0 (0, 0)	0 (0, 0)	0 (0, 0)	0 (0, 0)	0 (0, 0)	0 (0, 0)	0 (0, 0)	0 (0, 0)	0 (0, 0)	0 (0, 0)	0 (0, 0)	0 (0, 0)	0 (0, 0)	0 (0, 0)	0 (0, 0)	1 (0, 1)	0 (0, 0)	1 (1, 1)
Xinzhou	Shanxi	North	Female	40 y～	0 (0, 0)	0 (0, 0)	0 (0, 0)	1 (1, 1)	0 (0, 0)	0 (0, 0)	0 (0, 0)	0 (0, 0)	0 (0, 0)	0 (0, 0)	0 (0, 0)	0 (0, 0)	0 (0, 0)	0 (0, 0)	0 (0, 0)	0 (0, 0)	0 (0, 0)	0 (0, 0)	0 (0, 0)	0 (0, 0)	0 (0, 0)	0 (0, 0)	0 (0, 0)	1 (1, 1)	1 (1, 1)	1 (1, 1)	0 (0, 0)	2 (2, 2)
Xinzhou	Shanxi	North	Female	45 y～	0 (0, 0)	1 (0, 1)	0 (0, 0)	1 (1, 1)	0 (0, 0)	0 (0, 0)	0 (0, 0)	0 (0, 0)	0 (0, 0)	0 (0, 0)	0 (0, 0)	1 (1, 1)	0 (0, 0)	0 (0, 0)	0 (0, 0)	0 (0, 0)	0 (0, 0)	0 (0, 0)	0 (0, 0)	0 (0, 0)	1 (0, 1)	1 (1, 1)	0 (0, 0)	1 (1, 2)	1 (1, 2)	2 (2, 2)	0 (0, 1)	4 (3, 4)
Xinzhou	Shanxi	North	Female	50 y～	1 (1, 1)	1 (1, 1)	0 (0, 0)	2 (1, 2)	0 (0, 0)	0 (0, 0)	0 (0, 0)	0 (0, 0)	0 (0, 0)	1 (0, 1)	0 (0, 0)	1 (1, 1)	0 (0, 0)	0 (0, 0)	0 (0, 0)	0 (0, 0)	0 (0, 0)	0 (0, 0)	0 (0, 0)	0 (0, 0)	1 (1, 1)	1 (1, 1)	0 (0, 0)	2 (2, 2)	2 (2, 2)	2 (2, 3)	1 (1, 1)	5 (4, 6)
Xinzhou	Shanxi	North	Female	55 y～	1 (1, 1)	1 (1, 2)	0 (0, 0)	3 (3, 3)	0 (0, 0)	0 (0, 0)	0 (0, 0)	0 (0, 0)	1 (0, 1)	1 (1, 1)	0 (0, 0)	2 (1, 2)	0 (0, 0)	0 (0, 0)	0 (0, 0)	0 (0, 0)	0 (0, 0)	0 (0, 0)	0 (0, 0)	0 (0, 0)	1 (1, 1)	1 (1, 2)	0 (0, 0)	3 (2, 3)	3 (3, 4)	4 (4, 5)	1 (1, 1)	8 (7, 10)
Xinzhou	Shanxi	North	Female	60 y～	1 (1, 1)	2 (1, 2)	0 (0, 0)	3 (3, 3)	0 (0, 0)	0 (0, 0)	0 (0, 0)	0 (0, 1)	1 (0, 1)	1 (1, 1)	0 (0, 0)	2 (1, 2)	0 (0, 0)	0 (0, 0)	0 (0, 0)	0 (0, 0)	0 (0, 0)	0 (0, 0)	0 (0, 0)	0 (0, 0)	1 (1, 2)	2 (2, 2)	0 (0, 0)	4 (3, 4)	4 (3, 4)	5 (4, 5)	1 (1, 1)	9 (8, 11)
Xinzhou	Shanxi	North	Female	65 y～	2 (1, 2)	2 (2, 2)	1 (0, 1)	4 (4, 5)	0 (0, 0)	0 (0, 0)	0 (0, 0)	1 (1, 1)	1 (1, 1)	1 (1, 1)	0 (0, 0)	2 (2, 3)	0 (0, 0)	0 (0, 0)	0 (0, 0)	1 (0, 1)	0 (0, 0)	0 (0, 0)	0 (0, 0)	0 (0, 0)	2 (2, 2)	2 (2, 3)	1 (0, 1)	5 (4, 5)	5 (4, 5)	7 (5, 7)	2 (1, 2)	13 (11, 15)
Xinzhou	Shanxi	North	Female	70 y～	2 (2, 3)	3 (3, 4)	1 (1, 1)	6 (5, 7)	1 (0, 1)	1 (1, 1)	0 (0, 0)	1 (1, 2)	1 (1, 1)	1 (1, 2)	0 (0, 0)	3 (2, 3)	0 (0, 0)	0 (0, 1)	0 (0, 0)	1 (1, 1)	0 (0, 0)	0 (0, 0)	0 (0, 0)	1 (0, 1)	3 (2, 3)	4 (3, 4)	1 (1, 1)	7 (6, 8)	7 (6, 8)	10 (8, 11)	2 (2, 3)	19 (16, 22)
Xinzhou	Shanxi	North	Female	75 y～	4 (3, 4)	5 (4, 6)	1 (1, 1)	10 (8, 11)	1 (1, 1)	2 (1, 2)	0 (0, 0)	3 (2, 3)	1 (1, 1)	2 (1, 2)	0 (0, 0)	3 (3, 4)	1 (1, 1)	1 (1, 1)	0 (0, 0)	2 (1, 2)	0 (0, 0)	0 (0, 1)	0 (0, 0)	1 (1, 1)	4 (4, 5)	6 (5, 6)	1 (1, 2)	11 (10, 12)	11 (9, 13)	15 (13, 18)	4 (3, 4)	30 (25, 34)
Xinzhou	Shanxi	North	Female	80 y～	4 (3, 4)	5 (4, 6)	1 (1, 1)	10 (8, 11)	1 (1, 2)	2 (1, 2)	1 (0, 1)	4 (3, 4)	1 (1, 1)	1 (1, 1)	0 (0, 0)	2 (2, 3)	1 (1, 1)	1 (1, 2)	0 (0, 0)	3 (2, 3)	0 (0, 0)	0 (0, 0)	0 (0, 0)	1 (1, 1)	4 (3, 4)	5 (4, 5)	1 (1, 1)	10 (8, 11)	11 (9, 13)	14 (11, 16)	4 (3, 4)	29 (24, 34)
Xinzhou	Shanxi	North	Female	85 y～	5 (4, 5)	6 (5, 7)	2 (1, 2)	12 (10, 14)	2 (2, 3)	3 (2, 3)	1 (1, 1)	6 (5, 7)	1 (0, 1)	1 (1, 1)	0 (0, 0)	2 (1, 2)	2 (1, 2)	2 (2, 3)	1 (1, 1)	5 (4, 6)	0 (0, 0)	0 (0, 0)	0 (0, 0)	1 (0, 1)	4 (3, 4)	5 (4, 5)	1 (1, 1)	9 (8, 11)	13 (11, 15)	17 (14, 20)	5 (4, 5)	35 (28, 41)
Yangquan	Shanxi	North	Male	0 y～	0 (0, 0)	0 (0, 0)	0 (0, 0)	0 (0, 0)	0 (0, 0)	0 (0, 0)	0 (0, 0)	0 (0, 0)	0 (0, 0)	0 (0, 0)	0 (0, 0)	0 (0, 0)	0 (0, 0)	0 (0, 0)	0 (0, 0)	0 (0, 0)	0 (0, 0)	0 (0, 0)	0 (0, 0)	0 (0, 0)	0 (0, 0)	0 (0, 0)	0 (0, 0)	0 (0, 0)	0 (0, 0)	0 (0, 0)	0 (0, 0)	0 (0, 0)
Yangquan	Shanxi	North	Male	1 y～	0 (0, 0)	0 (0, 0)	0 (0, 0)	0 (0, 0)	0 (0, 0)	0 (0, 0)	0 (0, 0)	0 (0, 0)	0 (0, 0)	0 (0, 0)	0 (0, 0)	0 (0, 0)	0 (0, 0)	0 (0, 0)	0 (0, 0)	0 (0, 0)	0 (0, 0)	0 (0, 0)	0 (0, 0)	0 (0, 0)	0 (0, 0)	0 (0, 0)	0 (0, 0)	0 (0, 0)	0 (0, 0)	0 (0, 0)	0 (0, 0)	0 (0, 0)
Yangquan	Shanxi	North	Male	5 y～	0 (0, 0)	0 (0, 0)	0 (0, 0)	0 (0, 0)	0 (0, 0)	0 (0, 0)	0 (0, 0)	0 (0, 0)	0 (0, 0)	0 (0, 0)	0 (0, 0)	0 (0, 0)	0 (0, 0)	0 (0, 0)	0 (0, 0)	0 (0, 0)	0 (0, 0)	0 (0, 0)	0 (0, 0)	0 (0, 0)	0 (0, 0)	0 (0, 0)	0 (0, 0)	0 (0, 0)	0 (0, 0)	0 (0, 0)	0 (0, 0)	0 (0, 0)
Yangquan	Shanxi	North	Male	10 y～	0 (0, 0)	0 (0, 0)	0 (0, 0)	0 (0, 0)	0 (0, 0)	0 (0, 0)	0 (0, 0)	0 (0, 0)	0 (0, 0)	0 (0, 0)	0 (0, 0)	0 (0, 0)	0 (0, 0)	0 (0, 0)	0 (0, 0)	0 (0, 0)	0 (0, 0)	0 (0, 0)	0 (0, 0)	0 (0, 0)	0 (0, 0)	0 (0, 0)	0 (0, 0)	0 (0, 0)	0 (0, 0)	0 (0, 0)	0 (0, 0)	0 (0, 0)
Yangquan	Shanxi	North	Male	15 y～	0 (0, 0)	0 (0, 0)	0 (0, 0)	0 (0, 0)	0 (0, 0)	0 (0, 0)	0 (0, 0)	0 (0, 0)	0 (0, 0)	0 (0, 0)	0 (0, 0)	0 (0, 0)	0 (0, 0)	0 (0, 0)	0 (0, 0)	0 (0, 0)	0 (0, 0)	0 (0, 0)	0 (0, 0)	0 (0, 0)	0 (0, 0)	0 (0, 0)	0 (0, 0)	0 (0, 0)	0 (0, 0)	0 (0, 0)	0 (0, 0)	1 (1, 1)
Yangquan	Shanxi	North	Male	20 y～	0 (0, 0)	0 (0, 0)	0 (0, 0)	0 (0, 0)	0 (0, 0)	0 (0, 0)	0 (0, 0)	0 (0, 0)	0 (0, 0)	0 (0, 0)	0 (0, 0)	0 (0, 0)	0 (0, 0)	0 (0, 0)	0 (0, 0)	0 (0, 0)	0 (0, 0)	0 (0, 0)	0 (0, 0)	0 (0, 0)	0 (0, 0)	0 (0, 0)	0 (0, 0)	0 (0, 0)	0 (0, 0)	0 (0, 0)	0 (0, 0)	1 (1, 1)
Yangquan	Shanxi	North	Male	25 y～	0 (0, 0)	0 (0, 0)	0 (0, 0)	0 (0, 0)	0 (0, 0)	0 (0, 0)	0 (0, 0)	0 (0, 0)	0 (0, 0)	0 (0, 0)	0 (0, 0)	0 (0, 0)	0 (0, 0)	0 (0, 0)	0 (0, 0)	0 (0, 0)	0 (0, 0)	0 (0, 0)	0 (0, 0)	0 (0, 0)	0 (0, 0)	0 (0, 0)	0 (0, 0)	0 (0, 0)	0 (0, 0)	0 (0, 0)	0 (0, 0)	1 (1, 1)
Yangquan	Shanxi	North	Male	30 y～	1 (0, 1)	0 (0, 1)	0 (0, 0)	1 (1, 1)	0 (0, 0)	0 (0, 0)	0 (0, 0)	0 (0, 0)	0 (0, 0)	0 (0, 0)	0 (0, 0)	0 (0, 0)	0 (0, 0)	0 (0, 0)	0 (0, 0)	0 (0, 0)	0 (0, 0)	0 (0, 0)	0 (0, 0)	0 (0, 0)	0 (0, 0)	0 (0, 0)	0 (0, 0)	1 (1, 1)	1 (1, 1)	1 (1, 1)	0 (0, 0)	2 (2, 3)
Yangquan	Shanxi	North	Male	35 y～	1 (1, 1)	1 (1, 1)	0 (0, 0)	3 (2, 3)	0 (0, 0)	0 (0, 0)	0 (0, 0)	0 (0, 0)	0 (0, 0)	0 (0, 0)	0 (0, 0)	0 (0, 1)	0 (0, 0)	0 (0, 0)	0 (0, 0)	0 (0, 0)	0 (0, 0)	0 (0, 0)	0 (0, 0)	0 (0, 0)	1 (1, 1)	1 (1, 1)	0 (0, 0)	2 (2, 2)	2 (2, 3)	2 (2, 2)	1 (1, 1)	5 (5, 6)
Yangquan	Shanxi	North	Male	40 y～	2 (2, 3)	2 (2, 2)	1 (1, 1)	5 (5, 6)	0 (0, 0)	0 (0, 0)	0 (0, 0)	0 (0, 0)	0 (0, 0)	0 (0, 0)	0 (0, 0)	1 (1, 1)	0 (0, 0)	0 (0, 0)	0 (0, 0)	0 (0, 1)	0 (0, 0)	0 (0, 0)	0 (0, 0)	0 (0, 0)	2 (2, 2)	2 (1, 2)	1 (1, 1)	4 (4, 5)	5 (4, 5)	4 (4, 5)	2 (2, 2)	11 (9, 12)
Yangquan	Shanxi	North	Male	45 y～	3 (3, 3)	2 (2, 3)	1 (1, 1)	7 (6, 7)	0 (0, 0)	0 (0, 0)	0 (0, 0)	0 (0, 0)	1 (1, 1)	0 (0, 1)	0 (0, 0)	1 (1, 2)	0 (0, 0)	0 (0, 0)	0 (0, 0)	0 (0, 0)	0 (0, 0)	0 (0, 0)	0 (0, 0)	0 (0, 0)	3 (2, 3)	2 (2, 2)	1 (1, 1)	6 (5, 7)	7 (6, 8)	5 (5, 6)	3 (2, 3)	15 (13, 17)
Yangquan	Shanxi	North	Male	50 y～	3 (3, 4)	3 (2, 3)	1 (1, 2)	8 (7, 8)	0 (0, 0)	0 (0, 0)	0 (0, 0)	0 (0, 1)	1 (1, 2)	1 (1, 1)	1 (0, 1)	3 (2, 3)	0 (0, 0)	0 (0, 0)	0 (0, 0)	1 (0, 1)	0 (0, 0)	0 (0, 0)	0 (0, 0)	0 (0, 0)	3 (3, 4)	3 (2, 3)	1 (1, 2)	8 (7, 8)	9 (8, 10)	7 (6, 8)	4 (3, 4)	19 (16, 22)
Yangquan	Shanxi	North	Male	55 y～	6 (5, 7)	5 (4, 5)	2 (2, 3)	13 (11, 14)	1 (1, 1)	0 (0, 0)	0 (0, 0)	1 (1, 2)	3 (3, 4)	2 (2, 3)	1 (1, 2)	7 (5, 8)	0 (0, 1)	0 (0, 0)	0 (0, 0)	1 (1, 1)	0 (0, 0)	0 (0, 0)	0 (0, 0)	1 (1, 1)	6 (5, 7)	5 (4, 5)	2 (2, 3)	13 (12, 15)	17 (14, 19)	12 (11, 14)	7 (6, 8)	36 (30, 41)
Yangquan	Shanxi	North	Male	60 y～	5 (4, 5)	4 (3, 4)	2 (2, 2)	11 (9, 12)	1 (1, 1)	1 (1, 1)	0 (0, 0)	2 (2, 2)	4 (3, 5)	3 (2, 3)	1 (1, 2)	8 (6, 10)	1 (0, 1)	0 (0, 0)	0 (0, 0)	1 (1, 1)	0 (0, 0)	0 (0, 0)	0 (0, 0)	1 (0, 1)	6 (5, 6)	5 (4, 5)	2 (2, 2)	12 (11, 14)	16 (13, 18)	13 (11, 14)	6 (5, 7)	34 (29, 39)
Yangquan	Shanxi	North	Male	65 y～	5 (4, 5)	4 (3, 4)	2 (2, 2)	11 (9, 12)	1 (1, 2)	1 (1, 1)	0 (0, 1)	3 (2, 3)	4 (3, 5)	3 (2, 4)	1 (1, 2)	9 (7, 11)	1 (1, 1)	1 (0, 1)	0 (0, 0)	2 (1, 2)	0 (0, 0)	0 (0, 0)	0 (0, 0)	1 (0, 1)	6 (5, 7)	5 (4, 6)	2 (2, 3)	13 (12, 15)	18 (15, 20)	14 (11, 16)	6 (5, 7)	38 (31, 43)
Yangquan	Shanxi	North	Male	70 y～	6 (5, 6)	5 (4, 5)	2 (2, 2)	13 (10, 14)	3 (2, 3)	2 (2, 2)	1 (1, 1)	6 (5, 6)	5 (4, 6)	3 (3, 4)	2 (1, 2)	10 (7, 12)	1 (1, 2)	1 (1, 1)	0 (0, 0)	2 (2, 3)	0 (0, 0)	0 (0, 0)	0 (0, 0)	1 (1, 1)	8 (7, 9)	7 (6, 7)	3 (3, 3)	17 (15, 19)	23 (19, 26)	18 (15, 20)	8 (7, 9)	49 (40, 56)
Yangquan	Shanxi	North	Male	75 y～	7 (6, 8)	6 (5, 7)	3 (2, 3)	15 (12, 17)	4 (4, 5)	3 (3, 3)	1 (1, 2)	9 (7, 10)	5 (4, 6)	3 (2, 4)	2 (1, 2)	10 (7, 12)	2 (1, 2)	1 (1, 2)	1 (0, 1)	4 (3, 5)	0 (0, 1)	0 (0, 0)	0 (0, 0)	1 (1, 1)	9 (8, 10)	8 (7, 8)	3 (3, 4)	20 (17, 22)	27 (22, 31)	21 (18, 24)	10 (8, 11)	58 (48, 67)
Yangquan	Shanxi	North	Male	80 y～	5 (4, 6)	4 (4, 5)	2 (2, 2)	11 (9, 13)	4 (3, 4)	3 (3, 4)	1 (1, 2)	8 (7, 10)	2 (2, 3)	2 (2, 3)	1 (1, 1)	5 (4, 6)	2 (1, 2)	2 (1, 2)	1 (1, 1)	4 (3, 5)	0 (0, 0)	0 (0, 0)	0 (0, 0)	1 (1, 1)	6 (5, 7)	5 (5, 6)	2 (2, 3)	14 (12, 15)	19 (16, 22)	17 (14, 20)	7 (6, 8)	43 (36, 50)
Yangquan	Shanxi	North	Male	85 y～	5 (4, 5)	4 (3, 5)	2 (1, 2)	10 (8, 12)	4 (3, 4)	3 (3, 4)	1 (1, 2)	9 (7, 10)	1 (1, 2)	1 (1, 2)	0 (0, 1)	3 (2, 4)	3 (2, 4)	3 (2, 3)	1 (1, 1)	7 (5, 8)	0 (0, 0)	0 (0, 0)	0 (0, 0)	1 (0, 1)	4 (4, 5)	4 (3, 4)	2 (1, 2)	9 (8, 11)	17 (14, 20)	15 (12, 18)	6 (5, 7)	39 (32, 45)
Yangquan	Shanxi	North	Female	0 y～	0 (0, 0)	0 (0, 0)	0 (0, 0)	0 (0, 0)	0 (0, 0)	0 (0, 0)	0 (0, 0)	0 (0, 0)	0 (0, 0)	0 (0, 0)	0 (0, 0)	0 (0, 0)	0 (0, 0)	0 (0, 0)	0 (0, 0)	0 (0, 0)	0 (0, 0)	0 (0, 0)	0 (0, 0)	0 (0, 0)	0 (0, 0)	0 (0, 0)	0 (0, 0)	0 (0, 0)	0 (0, 0)	0 (0, 0)	0 (0, 0)	0 (0, 0)
Yangquan	Shanxi	North	Female	1 y～	0 (0, 0)	0 (0, 0)	0 (0, 0)	0 (0, 0)	0 (0, 0)	0 (0, 0)	0 (0, 0)	0 (0, 0)	0 (0, 0)	0 (0, 0)	0 (0, 0)	0 (0, 0)	0 (0, 0)	0 (0, 0)	0 (0, 0)	0 (0, 0)	0 (0, 0)	0 (0, 0)	0 (0, 0)	0 (0, 0)	0 (0, 0)	0 (0, 0)	0 (0, 0)	0 (0, 0)	0 (0, 0)	0 (0, 0)	0 (0, 0)	0 (0, 0)
Yangquan	Shanxi	North	Female	5 y～	0 (0, 0)	0 (0, 0)	0 (0, 0)	0 (0, 0)	0 (0, 0)	0 (0, 0)	0 (0, 0)	0 (0, 0)	0 (0, 0)	0 (0, 0)	0 (0, 0)	0 (0, 0)	0 (0, 0)	0 (0, 0)	0 (0, 0)	0 (0, 0)	0 (0, 0)	0 (0, 0)	0 (0, 0)	0 (0, 0)	0 (0, 0)	0 (0, 0)	0 (0, 0)	0 (0, 0)	0 (0, 0)	0 (0, 0)	0 (0, 0)	0 (0, 0)
Yangquan	Shanxi	North	Female	10 y～	0 (0, 0)	0 (0, 0)	0 (0, 0)	0 (0, 0)	0 (0, 0)	0 (0, 0)	0 (0, 0)	0 (0, 0)	0 (0, 0)	0 (0, 0)	0 (0, 0)	0 (0, 0)	0 (0, 0)	0 (0, 0)	0 (0, 0)	0 (0, 0)	0 (0, 0)	0 (0, 0)	0 (0, 0)	0 (0, 0)	0 (0, 0)	0 (0, 0)	0 (0, 0)	0 (0, 0)	0 (0, 0)	0 (0, 0)	0 (0, 0)	0 (0, 0)
Yangquan	Shanxi	North	Female	15 y～	0 (0, 0)	0 (0, 0)	0 (0, 0)	0 (0, 0)	0 (0, 0)	0 (0, 0)	0 (0, 0)	0 (0, 0)	0 (0, 0)	0 (0, 0)	0 (0, 0)	0 (0, 0)	0 (0, 0)	0 (0, 0)	0 (0, 0)	0 (0, 0)	0 (0, 0)	0 (0, 0)	0 (0, 0)	0 (0, 0)	0 (0, 0)	0 (0, 0)	0 (0, 0)	0 (0, 0)	0 (0, 0)	0 (0, 0)	0 (0, 0)	0 (0, 0)
Yangquan	Shanxi	North	Female	20 y～	0 (0, 0)	0 (0, 0)	0 (0, 0)	0 (0, 0)	0 (0, 0)	0 (0, 0)	0 (0, 0)	0 (0, 0)	0 (0, 0)	0 (0, 0)	0 (0, 0)	0 (0, 0)	0 (0, 0)	0 (0, 0)	0 (0, 0)	0 (0, 0)	0 (0, 0)	0 (0, 0)	0 (0, 0)	0 (0, 0)	0 (0, 0)	0 (0, 0)	0 (0, 0)	0 (0, 0)	0 (0, 0)	0 (0, 0)	0 (0, 0)	0 (0, 0)
Yangquan	Shanxi	North	Female	25 y～	0 (0, 0)	0 (0, 0)	0 (0, 0)	0 (0, 0)	0 (0, 0)	0 (0, 0)	0 (0, 0)	0 (0, 0)	0 (0, 0)	0 (0, 0)	0 (0, 0)	0 (0, 0)	0 (0, 0)	0 (0, 0)	0 (0, 0)	0 (0, 0)	0 (0, 0)	0 (0, 0)	0 (0, 0)	0 (0, 0)	0 (0, 0)	0 (0, 0)	0 (0, 0)	0 (0, 0)	0 (0, 0)	0 (0, 0)	0 (0, 0)	0 (0, 0)
Yangquan	Shanxi	North	Female	30 y～	0 (0, 0)	0 (0, 0)	0 (0, 0)	0 (0, 0)	0 (0, 0)	0 (0, 0)	0 (0, 0)	0 (0, 0)	0 (0, 0)	0 (0, 0)	0 (0, 0)	0 (0, 0)	0 (0, 0)	0 (0, 0)	0 (0, 0)	0 (0, 0)	0 (0, 0)	0 (0, 0)	0 (0, 0)	0 (0, 0)	0 (0, 0)	0 (0, 0)	0 (0, 0)	0 (0, 0)	0 (0, 0)	0 (0, 0)	0 (0, 0)	1 (1, 1)
Yangquan	Shanxi	North	Female	35 y～	0 (0, 0)	0 (0, 0)	0 (0, 0)	1 (1, 1)	0 (0, 0)	0 (0, 0)	0 (0, 0)	0 (0, 0)	0 (0, 0)	0 (0, 0)	0 (0, 0)	0 (0, 0)	0 (0, 0)	0 (0, 0)	0 (0, 0)	0 (0, 0)	0 (0, 0)	0 (0, 0)	0 (0, 0)	0 (0, 0)	0 (0, 0)	0 (0, 0)	0 (0, 0)	0 (0, 0)	1 (1, 1)	1 (1, 1)	0 (0, 0)	2 (1, 2)
Yangquan	Shanxi	North	Female	40 y～	0 (0, 0)	1 (0, 1)	0 (0, 0)	1 (1, 1)	0 (0, 0)	0 (0, 0)	0 (0, 0)	0 (0, 0)	0 (0, 0)	0 (0, 0)	0 (0, 0)	0 (0, 0)	0 (0, 0)	0 (0, 0)	0 (0, 0)	0 (0, 0)	0 (0, 0)	0 (0, 0)	0 (0, 0)	0 (0, 0)	0 (0, 1)	1 (0, 1)	0 (0, 0)	1 (1, 1)	1 (1, 1)	1 (1, 2)	0 (0, 0)	3 (2, 3)
Yangquan	Shanxi	North	Female	45 y～	1 (1, 1)	1 (1, 1)	0 (0, 0)	2 (1, 2)	0 (0, 0)	0 (0, 0)	0 (0, 0)	0 (0, 0)	0 (0, 0)	0 (0, 1)	0 (0, 0)	1 (1, 1)	0 (0, 0)	0 (0, 0)	0 (0, 0)	0 (0, 0)	0 (0, 0)	0 (0, 0)	0 (0, 0)	0 (0, 0)	1 (1, 1)	1 (1, 1)	0 (0, 0)	2 (2, 2)	2 (2, 2)	2 (2, 3)	0 (0, 1)	5 (4, 5)
Yangquan	Shanxi	North	Female	50 y～	1 (1, 1)	1 (1, 1)	0 (0, 0)	2 (2, 2)	0 (0, 0)	0 (0, 0)	0 (0, 0)	0 (0, 0)	0 (0, 1)	1 (0, 1)	0 (0, 0)	1 (1, 1)	0 (0, 0)	0 (0, 0)	0 (0, 0)	0 (0, 0)	0 (0, 0)	0 (0, 0)	0 (0, 0)	0 (0, 0)	1 (1, 1)	1 (1, 1)	0 (0, 0)	3 (2, 3)	3 (2, 3)	3 (3, 3)	1 (1, 1)	6 (5, 7)
Yangquan	Shanxi	North	Female	55 y～	2 (1, 2)	2 (2, 2)	0 (0, 0)	4 (3, 4)	0 (0, 0)	0 (0, 0)	0 (0, 0)	0 (0, 0)	1 (1, 1)	1 (1, 1)	0 (0, 0)	2 (2, 3)	0 (0, 0)	0 (0, 0)	0 (0, 0)	0 (0, 1)	0 (0, 0)	0 (0, 0)	0 (0, 0)	0 (0, 0)	2 (1, 2)	2 (2, 2)	0 (0, 0)	4 (3, 4)	4 (4, 5)	5 (4, 6)	1 (1, 1)	11 (9, 12)
Yangquan	Shanxi	North	Female	60 y～	2 (1, 2)	2 (2, 2)	0 (0, 0)	4 (3, 4)	0 (0, 0)	0 (0, 0)	0 (0, 0)	1 (0, 1)	1 (1, 1)	1 (1, 1)	0 (0, 0)	2 (2, 3)	0 (0, 0)	0 (0, 0)	0 (0, 0)	0 (0, 1)	0 (0, 0)	0 (0, 0)	0 (0, 0)	0 (0, 0)	2 (2, 2)	2 (2, 2)	0 (0, 1)	5 (4, 5)	5 (4, 6)	6 (5, 7)	1 (1, 1)	12 (10, 14)
Yangquan	Shanxi	North	Female	65 y～	2 (2, 3)	3 (2, 3)	1 (0, 1)	6 (5, 6)	0 (0, 0)	1 (0, 1)	0 (0, 0)	1 (1, 1)	1 (1, 1)	1 (1, 2)	0 (0, 0)	3 (2, 3)	0 (0, 0)	0 (0, 0)	0 (0, 0)	1 (1, 1)	0 (0, 0)	0 (0, 0)	0 (0, 0)	0 (0, 1)	3 (2, 3)	3 (3, 3)	1 (1, 1)	6 (5, 7)	7 (6, 8)	8 (7, 9)	2 (1, 2)	17 (14, 19)
Yangquan	Shanxi	North	Female	70 y～	3 (3, 4)	4 (3, 5)	1 (1, 1)	8 (7, 9)	1 (1, 1)	1 (1, 1)	0 (0, 0)	2 (2, 2)	1 (1, 2)	2 (1, 2)	0 (0, 0)	3 (3, 4)	0 (0, 1)	1 (0, 1)	0 (0, 0)	1 (1, 1)	0 (0, 0)	0 (0, 0)	0 (0, 0)	1 (1, 1)	4 (3, 4)	5 (4, 5)	1 (1, 1)	9 (8, 10)	10 (8, 12)	12 (10, 14)	2 (2, 3)	25 (21, 28)
Yangquan	Shanxi	North	Female	75 y～	5 (4, 6)	6 (5, 7)	1 (1, 1)	13 (10, 14)	1 (1, 2)	2 (2, 2)	0 (0, 0)	4 (3, 4)	2 (1, 2)	2 (2, 3)	0 (0, 0)	4 (3, 5)	1 (1, 1)	1 (1, 2)	0 (0, 0)	2 (2, 3)	0 (0, 1)	1 (0, 1)	0 (0, 0)	1 (1, 1)	6 (5, 7)	7 (6, 8)	1 (1, 2)	14 (12, 16)	16 (13, 18)	19 (16, 22)	4 (3, 4)	39 (32, 44)
Yangquan	Shanxi	North	Female	80 y～	5 (4, 6)	6 (5, 7)	1 (1, 2)	13 (10, 15)	2 (2, 2)	2 (2, 3)	1 (0, 1)	5 (4, 5)	1 (1, 2)	2 (1, 2)	0 (0, 0)	3 (2, 4)	1 (1, 2)	2 (1, 2)	0 (0, 0)	3 (3, 4)	0 (0, 0)	0 (0, 0)	0 (0, 0)	1 (1, 1)	5 (5, 6)	6 (5, 7)	1 (1, 2)	13 (11, 14)	16 (13, 18)	18 (15, 21)	4 (3, 5)	38 (31, 44)
Yangquan	Shanxi	North	Female	85 y～	7 (5, 8)	8 (6, 9)	2 (1, 2)	16 (13, 18)	3 (3, 4)	4 (3, 4)	1 (1, 1)	8 (6, 9)	1 (1, 1)	1 (1, 1)	0 (0, 0)	2 (2, 3)	3 (2, 3)	3 (3, 4)	1 (1, 1)	7 (5, 8)	0 (0, 0)	0 (0, 0)	0 (0, 0)	1 (1, 1)	5 (4, 6)	6 (5, 7)	1 (1, 1)	12 (11, 14)	19 (15, 22)	22 (18, 25)	5 (4, 6)	46 (37, 53)
Yuncheng	Shanxi	North	Male	0 y～	0 (0, 0)	0 (0, 0)	0 (0, 0)	0 (0, 0)	0 (0, 0)	0 (0, 0)	0 (0, 0)	0 (0, 0)	0 (0, 0)	0 (0, 0)	0 (0, 0)	0 (0, 0)	0 (0, 0)	0 (0, 0)	0 (0, 0)	0 (0, 0)	0 (0, 0)	0 (0, 0)	0 (0, 0)	0 (0, 0)	0 (0, 0)	0 (0, 0)	0 (0, 0)	0 (0, 0)	0 (0, 0)	0 (0, 0)	0 (0, 0)	0 (0, 0)
Yuncheng	Shanxi	North	Male	1 y～	0 (0, 0)	0 (0, 0)	0 (0, 0)	0 (0, 0)	0 (0, 0)	0 (0, 0)	0 (0, 0)	0 (0, 0)	0 (0, 0)	0 (0, 0)	0 (0, 0)	0 (0, 0)	0 (0, 0)	0 (0, 0)	0 (0, 0)	0 (0, 0)	0 (0, 0)	0 (0, 0)	0 (0, 0)	0 (0, 0)	0 (0, 0)	0 (0, 0)	0 (0, 0)	0 (0, 0)	0 (0, 0)	0 (0, 0)	0 (0, 0)	0 (0, 0)
Yuncheng	Shanxi	North	Male	5 y～	0 (0, 0)	0 (0, 0)	0 (0, 0)	0 (0, 0)	0 (0, 0)	0 (0, 0)	0 (0, 0)	0 (0, 0)	0 (0, 0)	0 (0, 0)	0 (0, 0)	0 (0, 0)	0 (0, 0)	0 (0, 0)	0 (0, 0)	0 (0, 0)	0 (0, 0)	0 (0, 0)	0 (0, 0)	0 (0, 0)	0 (0, 0)	0 (0, 0)	0 (0, 0)	0 (0, 0)	0 (0, 0)	0 (0, 0)	0 (0, 0)	0 (0, 0)
Yuncheng	Shanxi	North	Male	10 y～	0 (0, 0)	0 (0, 0)	0 (0, 0)	0 (0, 0)	0 (0, 0)	0 (0, 0)	0 (0, 0)	0 (0, 0)	0 (0, 0)	0 (0, 0)	0 (0, 0)	0 (0, 0)	0 (0, 0)	0 (0, 0)	0 (0, 0)	0 (0, 0)	0 (0, 0)	0 (0, 0)	0 (0, 0)	0 (0, 0)	0 (0, 0)	0 (0, 0)	0 (0, 0)	0 (0, 0)	0 (0, 0)	0 (0, 0)	0 (0, 0)	0 (0, 0)
Yuncheng	Shanxi	North	Male	15 y～	0 (0, 0)	0 (0, 0)	0 (0, 0)	0 (0, 0)	0 (0, 0)	0 (0, 0)	0 (0, 0)	0 (0, 0)	0 (0, 0)	0 (0, 0)	0 (0, 0)	0 (0, 0)	0 (0, 0)	0 (0, 0)	0 (0, 0)	0 (0, 0)	0 (0, 0)	0 (0, 0)	0 (0, 0)	0 (0, 0)	0 (0, 0)	0 (0, 0)	0 (0, 0)	0 (0, 0)	0 (0, 0)	0 (0, 0)	0 (0, 0)	1 (1, 1)
Yuncheng	Shanxi	North	Male	20 y～	0 (0, 0)	0 (0, 0)	0 (0, 0)	0 (0, 0)	0 (0, 0)	0 (0, 0)	0 (0, 0)	0 (0, 0)	0 (0, 0)	0 (0, 0)	0 (0, 0)	0 (0, 0)	0 (0, 0)	0 (0, 0)	0 (0, 0)	0 (0, 0)	0 (0, 0)	0 (0, 0)	0 (0, 0)	0 (0, 0)	0 (0, 0)	0 (0, 0)	0 (0, 0)	0 (0, 0)	0 (0, 0)	0 (0, 0)	0 (0, 0)	1 (1, 1)
Yuncheng	Shanxi	North	Male	25 y～	0 (0, 0)	0 (0, 0)	0 (0, 0)	0 (0, 0)	0 (0, 0)	0 (0, 0)	0 (0, 0)	0 (0, 0)	0 (0, 0)	0 (0, 0)	0 (0, 0)	0 (0, 0)	0 (0, 0)	0 (0, 0)	0 (0, 0)	0 (0, 0)	0 (0, 0)	0 (0, 0)	0 (0, 0)	0 (0, 0)	0 (0, 0)	0 (0, 0)	0 (0, 0)	0 (0, 0)	0 (0, 1)	0 (0, 0)	0 (0, 0)	1 (1, 1)
Yuncheng	Shanxi	North	Male	30 y～	1 (1, 1)	0 (0, 1)	0 (0, 0)	1 (1, 1)	0 (0, 0)	0 (0, 0)	0 (0, 0)	0 (0, 0)	0 (0, 0)	0 (0, 0)	0 (0, 0)	0 (0, 0)	0 (0, 0)	0 (0, 0)	0 (0, 0)	0 (0, 0)	0 (0, 0)	0 (0, 0)	0 (0, 0)	0 (0, 0)	0 (0, 0)	0 (0, 0)	0 (0, 0)	1 (1, 1)	1 (1, 1)	1 (1, 1)	0 (0, 0)	3 (2, 3)
Yuncheng	Shanxi	North	Male	35 y～	1 (1, 1)	1 (1, 1)	0 (0, 0)	3 (2, 3)	0 (0, 0)	0 (0, 0)	0 (0, 0)	0 (0, 0)	0 (0, 0)	0 (0, 0)	0 (0, 0)	0 (0, 1)	0 (0, 0)	0 (0, 0)	0 (0, 0)	0 (0, 0)	0 (0, 0)	0 (0, 0)	0 (0, 0)	0 (0, 0)	1 (1, 1)	1 (1, 1)	0 (0, 0)	2 (2, 2)	3 (2, 3)	2 (2, 2)	1 (1, 1)	6 (5, 6)
Yuncheng	Shanxi	North	Male	40 y～	3 (2, 3)	2 (2, 2)	1 (1, 1)	5 (5, 6)	0 (0, 0)	0 (0, 0)	0 (0, 0)	0 (0, 0)	0 (0, 1)	0 (0, 0)	0 (0, 0)	1 (1, 1)	0 (0, 0)	0 (0, 0)	0 (0, 0)	0 (0, 1)	0 (0, 0)	0 (0, 0)	0 (0, 0)	0 (0, 0)	2 (2, 2)	2 (1, 2)	1 (1, 1)	4 (4, 5)	6 (5, 6)	4 (3, 4)	2 (1, 2)	11 (10, 13)
Yuncheng	Shanxi	North	Male	45 y～	3 (3, 4)	2 (2, 2)	1 (1, 1)	7 (6, 7)	0 (0, 0)	0 (0, 0)	0 (0, 0)	0 (0, 0)	1 (1, 1)	0 (0, 1)	0 (0, 0)	1 (1, 2)	0 (0, 0)	0 (0, 0)	0 (0, 0)	0 (0, 0)	0 (0, 0)	0 (0, 0)	0 (0, 0)	0 (0, 0)	3 (3, 4)	2 (2, 2)	1 (1, 1)	6 (6, 7)	8 (7, 9)	5 (4, 6)	3 (2, 3)	16 (13, 17)
Yuncheng	Shanxi	North	Male	50 y～	4 (3, 4)	3 (2, 3)	1 (1, 1)	8 (7, 9)	0 (0, 0)	0 (0, 0)	0 (0, 0)	0 (0, 1)	2 (1, 2)	1 (1, 1)	0 (0, 1)	3 (2, 4)	0 (0, 0)	0 (0, 0)	0 (0, 0)	1 (0, 1)	0 (0, 0)	0 (0, 0)	0 (0, 0)	0 (0, 0)	4 (3, 4)	3 (2, 3)	1 (1, 1)	8 (7, 9)	10 (9, 12)	7 (6, 7)	3 (3, 4)	20 (17, 23)
Yuncheng	Shanxi	North	Male	55 y～	7 (6, 8)	5 (4, 5)	2 (2, 2)	14 (12, 15)	1 (1, 1)	0 (0, 0)	0 (0, 0)	1 (1, 2)	4 (3, 5)	2 (2, 3)	1 (1, 1)	7 (5, 9)	1 (0, 1)	0 (0, 0)	0 (0, 0)	1 (1, 1)	0 (0, 0)	0 (0, 0)	0 (0, 0)	1 (1, 1)	7 (6, 8)	5 (4, 5)	2 (2, 3)	14 (12, 16)	19 (16, 22)	12 (10, 14)	6 (5, 7)	38 (32, 43)
Yuncheng	Shanxi	North	Male	60 y～	6 (5, 6)	4 (3, 4)	2 (1, 2)	11 (10, 12)	1 (1, 1)	1 (1, 1)	0 (0, 0)	2 (2, 2)	4 (3, 5)	2 (2, 3)	1 (1, 2)	8 (6, 10)	1 (1, 1)	0 (0, 0)	0 (0, 0)	1 (1, 2)	0 (0, 0)	0 (0, 0)	0 (0, 0)	1 (0, 1)	6 (6, 7)	5 (4, 5)	2 (2, 2)	13 (11, 15)	19 (16, 21)	12 (10, 14)	6 (5, 6)	36 (30, 42)
Yuncheng	Shanxi	North	Male	65 y～	6 (5, 6)	4 (3, 4)	2 (1, 2)	11 (10, 12)	2 (1, 2)	1 (1, 1)	0 (0, 1)	3 (3, 4)	5 (4, 6)	3 (2, 3)	1 (1, 2)	9 (7, 11)	1 (1, 1)	1 (0, 1)	0 (0, 0)	2 (1, 2)	0 (0, 0)	0 (0, 0)	0 (0, 0)	1 (1, 1)	7 (6, 8)	5 (4, 6)	2 (2, 2)	14 (12, 16)	20 (17, 23)	13 (11, 15)	6 (5, 7)	40 (33, 46)
Yuncheng	Shanxi	North	Male	70 y～	7 (5, 7)	5 (4, 5)	2 (2, 2)	13 (11, 15)	3 (3, 4)	2 (2, 2)	1 (1, 1)	6 (5, 7)	6 (4, 7)	3 (2, 4)	2 (1, 2)	10 (8, 13)	1 (1, 2)	1 (1, 1)	0 (0, 1)	3 (2, 3)	0 (0, 1)	0 (0, 0)	0 (0, 0)	1 (1, 1)	9 (8, 10)	6 (6, 7)	3 (2, 3)	18 (16, 21)	26 (22, 30)	17 (14, 20)	8 (7, 9)	51 (43, 59)
Yuncheng	Shanxi	North	Male	75 y～	8 (6, 9)	6 (5, 6)	2 (2, 3)	16 (13, 18)	5 (4, 6)	3 (2, 3)	2 (1, 2)	9 (8, 11)	5 (4, 7)	3 (2, 4)	2 (1, 2)	10 (8, 12)	2 (2, 3)	1 (1, 1)	1 (1, 1)	4 (3, 5)	1 (0, 1)	0 (0, 0)	0 (0, 0)	1 (1, 1)	11 (9, 12)	7 (6, 8)	3 (3, 4)	21 (18, 24)	32 (26, 37)	20 (17, 23)	10 (8, 11)	62 (51, 71)
Yuncheng	Shanxi	North	Male	80 y～	6 (5, 7)	4 (4, 5)	2 (1, 2)	12 (10, 14)	4 (4, 5)	3 (3, 4)	1 (1, 2)	9 (8, 10)	3 (2, 3)	2 (1, 2)	1 (1, 1)	5 (4, 7)	2 (2, 3)	2 (1, 2)	1 (1, 1)	5 (4, 6)	0 (0, 0)	0 (0, 0)	0 (0, 0)	1 (1, 1)	7 (6, 8)	5 (4, 6)	2 (2, 2)	14 (12, 16)	22 (19, 26)	16 (14, 19)	7 (6, 8)	46 (38, 53)
Yuncheng	Shanxi	North	Male	85 y～	5 (4, 6)	4 (3, 5)	2 (1, 2)	11 (9, 13)	4 (4, 5)	3 (3, 4)	1 (1, 2)	9 (8, 10)	2 (1, 2)	1 (1, 1)	0 (0, 1)	3 (2, 4)	3 (3, 4)	3 (2, 3)	1 (1, 1)	7 (6, 9)	0 (0, 0)	0 (0, 0)	0 (0, 0)	1 (0, 1)	5 (4, 5)	4 (3, 4)	1 (1, 2)	10 (8, 11)	20 (16, 23)	15 (12, 17)	6 (5, 7)	41 (33, 47)
Yuncheng	Shanxi	North	Female	0 y～	0 (0, 0)	0 (0, 0)	0 (0, 0)	0 (0, 0)	0 (0, 0)	0 (0, 0)	0 (0, 0)	0 (0, 0)	0 (0, 0)	0 (0, 0)	0 (0, 0)	0 (0, 0)	0 (0, 0)	0 (0, 0)	0 (0, 0)	0 (0, 0)	0 (0, 0)	0 (0, 0)	0 (0, 0)	0 (0, 0)	0 (0, 0)	0 (0, 0)	0 (0, 0)	0 (0, 0)	0 (0, 0)	0 (0, 0)	0 (0, 0)	0 (0, 0)
Yuncheng	Shanxi	North	Female	1 y～	0 (0, 0)	0 (0, 0)	0 (0, 0)	0 (0, 0)	0 (0, 0)	0 (0, 0)	0 (0, 0)	0 (0, 0)	0 (0, 0)	0 (0, 0)	0 (0, 0)	0 (0, 0)	0 (0, 0)	0 (0, 0)	0 (0, 0)	0 (0, 0)	0 (0, 0)	0 (0, 0)	0 (0, 0)	0 (0, 0)	0 (0, 0)	0 (0, 0)	0 (0, 0)	0 (0, 0)	0 (0, 0)	0 (0, 0)	0 (0, 0)	0 (0, 0)
Yuncheng	Shanxi	North	Female	5 y～	0 (0, 0)	0 (0, 0)	0 (0, 0)	0 (0, 0)	0 (0, 0)	0 (0, 0)	0 (0, 0)	0 (0, 0)	0 (0, 0)	0 (0, 0)	0 (0, 0)	0 (0, 0)	0 (0, 0)	0 (0, 0)	0 (0, 0)	0 (0, 0)	0 (0, 0)	0 (0, 0)	0 (0, 0)	0 (0, 0)	0 (0, 0)	0 (0, 0)	0 (0, 0)	0 (0, 0)	0 (0, 0)	0 (0, 0)	0 (0, 0)	0 (0, 0)
Yuncheng	Shanxi	North	Female	10 y～	0 (0, 0)	0 (0, 0)	0 (0, 0)	0 (0, 0)	0 (0, 0)	0 (0, 0)	0 (0, 0)	0 (0, 0)	0 (0, 0)	0 (0, 0)	0 (0, 0)	0 (0, 0)	0 (0, 0)	0 (0, 0)	0 (0, 0)	0 (0, 0)	0 (0, 0)	0 (0, 0)	0 (0, 0)	0 (0, 0)	0 (0, 0)	0 (0, 0)	0 (0, 0)	0 (0, 0)	0 (0, 0)	0 (0, 0)	0 (0, 0)	0 (0, 0)
Yuncheng	Shanxi	North	Female	15 y～	0 (0, 0)	0 (0, 0)	0 (0, 0)	0 (0, 0)	0 (0, 0)	0 (0, 0)	0 (0, 0)	0 (0, 0)	0 (0, 0)	0 (0, 0)	0 (0, 0)	0 (0, 0)	0 (0, 0)	0 (0, 0)	0 (0, 0)	0 (0, 0)	0 (0, 0)	0 (0, 0)	0 (0, 0)	0 (0, 0)	0 (0, 0)	0 (0, 0)	0 (0, 0)	0 (0, 0)	0 (0, 0)	0 (0, 0)	0 (0, 0)	0 (0, 0)
Yuncheng	Shanxi	North	Female	20 y～	0 (0, 0)	0 (0, 0)	0 (0, 0)	0 (0, 0)	0 (0, 0)	0 (0, 0)	0 (0, 0)	0 (0, 0)	0 (0, 0)	0 (0, 0)	0 (0, 0)	0 (0, 0)	0 (0, 0)	0 (0, 0)	0 (0, 0)	0 (0, 0)	0 (0, 0)	0 (0, 0)	0 (0, 0)	0 (0, 0)	0 (0, 0)	0 (0, 0)	0 (0, 0)	0 (0, 0)	0 (0, 0)	0 (0, 0)	0 (0, 0)	0 (0, 0)
Yuncheng	Shanxi	North	Female	25 y～	0 (0, 0)	0 (0, 0)	0 (0, 0)	0 (0, 0)	0 (0, 0)	0 (0, 0)	0 (0, 0)	0 (0, 0)	0 (0, 0)	0 (0, 0)	0 (0, 0)	0 (0, 0)	0 (0, 0)	0 (0, 0)	0 (0, 0)	0 (0, 0)	0 (0, 0)	0 (0, 0)	0 (0, 0)	0 (0, 0)	0 (0, 0)	0 (0, 0)	0 (0, 0)	0 (0, 0)	0 (0, 0)	0 (0, 0)	0 (0, 0)	0 (0, 0)
Yuncheng	Shanxi	North	Female	30 y～	0 (0, 0)	0 (0, 0)	0 (0, 0)	0 (0, 0)	0 (0, 0)	0 (0, 0)	0 (0, 0)	0 (0, 0)	0 (0, 0)	0 (0, 0)	0 (0, 0)	0 (0, 0)	0 (0, 0)	0 (0, 0)	0 (0, 0)	0 (0, 0)	0 (0, 0)	0 (0, 0)	0 (0, 0)	0 (0, 0)	0 (0, 0)	0 (0, 0)	0 (0, 0)	0 (0, 0)	0 (0, 0)	0 (0, 0)	0 (0, 0)	1 (1, 1)
Yuncheng	Shanxi	North	Female	35 y～	0 (0, 0)	0 (0, 0)	0 (0, 0)	1 (1, 1)	0 (0, 0)	0 (0, 0)	0 (0, 0)	0 (0, 0)	0 (0, 0)	0 (0, 0)	0 (0, 0)	0 (0, 0)	0 (0, 0)	0 (0, 0)	0 (0, 0)	0 (0, 0)	0 (0, 0)	0 (0, 0)	0 (0, 0)	0 (0, 0)	0 (0, 0)	0 (0, 0)	0 (0, 0)	0 (0, 0)	1 (1, 1)	1 (1, 1)	0 (0, 0)	2 (1, 2)
Yuncheng	Shanxi	North	Female	40 y～	1 (0, 1)	1 (0, 1)	0 (0, 0)	1 (1, 1)	0 (0, 0)	0 (0, 0)	0 (0, 0)	0 (0, 0)	0 (0, 0)	0 (0, 0)	0 (0, 0)	0 (0, 0)	0 (0, 0)	0 (0, 0)	0 (0, 0)	0 (0, 0)	0 (0, 0)	0 (0, 0)	0 (0, 0)	0 (0, 0)	1 (0, 1)	1 (0, 1)	0 (0, 0)	1 (1, 1)	1 (1, 1)	1 (1, 1)	0 (0, 0)	3 (2, 3)
Yuncheng	Shanxi	North	Female	45 y～	1 (1, 1)	1 (1, 1)	0 (0, 0)	2 (1, 2)	0 (0, 0)	0 (0, 0)	0 (0, 0)	0 (0, 0)	0 (0, 0)	0 (0, 1)	0 (0, 0)	1 (1, 1)	0 (0, 0)	0 (0, 0)	0 (0, 0)	0 (0, 0)	0 (0, 0)	0 (0, 0)	0 (0, 0)	0 (0, 0)	1 (1, 1)	1 (1, 1)	0 (0, 0)	2 (2, 2)	2 (2, 2)	2 (2, 3)	0 (0, 0)	5 (4, 5)
Yuncheng	Shanxi	North	Female	50 y～	1 (1, 1)	1 (1, 1)	0 (0, 0)	2 (2, 2)	0 (0, 0)	0 (0, 0)	0 (0, 0)	0 (0, 0)	0 (0, 1)	1 (0, 1)	0 (0, 0)	1 (1, 1)	0 (0, 0)	0 (0, 0)	0 (0, 0)	0 (0, 0)	0 (0, 0)	0 (0, 0)	0 (0, 0)	0 (0, 0)	1 (1, 1)	1 (1, 1)	0 (0, 0)	3 (2, 3)	3 (2, 3)	3 (3, 3)	1 (1, 1)	7 (6, 7)
Yuncheng	Shanxi	North	Female	55 y～	2 (2, 2)	2 (2, 2)	0 (0, 0)	4 (3, 4)	0 (0, 0)	0 (0, 0)	0 (0, 0)	0 (0, 0)	1 (1, 1)	1 (1, 1)	0 (0, 0)	2 (2, 3)	0 (0, 0)	0 (0, 0)	0 (0, 0)	0 (0, 1)	0 (0, 0)	0 (0, 0)	0 (0, 0)	0 (0, 0)	2 (2, 2)	2 (1, 2)	0 (0, 0)	4 (3, 4)	5 (4, 6)	5 (4, 6)	1 (1, 1)	11 (10, 13)
Yuncheng	Shanxi	North	Female	60 y～	2 (2, 2)	2 (2, 2)	0 (0, 0)	4 (4, 5)	0 (0, 0)	0 (0, 0)	0 (0, 0)	1 (1, 1)	1 (1, 1)	1 (1, 1)	0 (0, 0)	2 (2, 3)	0 (0, 0)	0 (0, 0)	0 (0, 0)	0 (0, 1)	0 (0, 0)	0 (0, 0)	0 (0, 0)	0 (0, 0)	2 (2, 2)	2 (2, 2)	0 (0, 0)	5 (4, 5)	6 (5, 7)	6 (5, 7)	1 (1, 1)	13 (11, 15)
Yuncheng	Shanxi	North	Female	65 y～	3 (2, 3)	3 (2, 3)	1 (0, 1)	6 (5, 6)	0 (0, 1)	1 (0, 1)	0 (0, 0)	1 (1, 1)	1 (1, 2)	1 (1, 2)	0 (0, 0)	3 (2, 4)	0 (0, 0)	0 (0, 0)	0 (0, 0)	1 (1, 1)	0 (0, 0)	0 (0, 0)	0 (0, 0)	0 (0, 1)	3 (3, 3)	3 (2, 3)	1 (0, 1)	6 (6, 7)	8 (7, 9)	8 (7, 9)	2 (1, 2)	18 (15, 20)
Yuncheng	Shanxi	North	Female	70 y～	4 (3, 5)	4 (3, 4)	1 (1, 1)	9 (7, 10)	1 (1, 1)	1 (1, 1)	0 (0, 0)	2 (2, 2)	2 (1, 2)	2 (1, 2)	0 (0, 0)	3 (3, 4)	1 (0, 1)	1 (0, 1)	0 (0, 0)	1 (1, 2)	0 (0, 0)	0 (0, 0)	0 (0, 0)	1 (1, 1)	5 (4, 5)	4 (4, 5)	1 (1, 1)	10 (9, 11)	12 (10, 14)	12 (10, 14)	2 (2, 3)	26 (22, 30)
Yuncheng	Shanxi	North	Female	75 y～	6 (5, 7)	6 (5, 7)	1 (1, 1)	13 (11, 15)	2 (1, 2)	2 (2, 2)	0 (0, 0)	4 (3, 5)	2 (1, 2)	2 (2, 3)	0 (0, 0)	4 (3, 5)	1 (1, 1)	1 (1, 2)	0 (0, 0)	3 (2, 3)	1 (0, 1)	1 (0, 1)	0 (0, 0)	1 (1, 1)	7 (6, 8)	7 (6, 8)	1 (1, 2)	15 (13, 17)	18 (15, 21)	19 (16, 22)	4 (3, 4)	41 (34, 47)
Yuncheng	Shanxi	North	Female	80 y～	6 (5, 7)	6 (5, 7)	1 (1, 1)	14 (11, 15)	2 (2, 3)	2 (2, 3)	1 (0, 1)	5 (4, 6)	1 (1, 2)	1 (1, 2)	0 (0, 0)	3 (3, 4)	2 (1, 2)	2 (1, 2)	0 (0, 0)	4 (3, 4)	0 (0, 0)	0 (0, 0)	0 (0, 0)	1 (1, 1)	6 (5, 7)	6 (5, 7)	1 (1, 1)	13 (12, 15)	18 (15, 21)	18 (15, 20)	4 (3, 5)	40 (33, 46)
Yuncheng	Shanxi	North	Female	85 y～	8 (6, 9)	7 (6, 8)	2 (1, 2)	17 (13, 19)	4 (3, 4)	4 (3, 4)	1 (1, 1)	8 (7, 9)	1 (1, 1)	1 (1, 1)	0 (0, 0)	2 (2, 3)	3 (3, 4)	3 (2, 4)	1 (1, 1)	7 (6, 9)	0 (0, 0)	0 (0, 0)	0 (0, 0)	1 (1, 1)	6 (5, 7)	6 (5, 7)	1 (1, 1)	13 (11, 15)	22 (18, 26)	21 (18, 25)	5 (4, 6)	48 (40, 56)
Changzhi	Shanxi	North	Male	0 y～	0 (0, 0)	0 (0, 0)	0 (0, 0)	0 (0, 0)	0 (0, 0)	0 (0, 0)	0 (0, 0)	0 (0, 0)	0 (0, 0)	0 (0, 0)	0 (0, 0)	0 (0, 0)	0 (0, 0)	0 (0, 0)	0 (0, 0)	1 (1, 1)	0 (0, 0)	0 (0, 0)	0 (0, 0)	0 (0, 0)	0 (0, 0)	0 (0, 0)	0 (0, 0)	0 (0, 0)	0 (0, 0)	0 (0, 0)	0 (0, 0)	1 (1, 1)
Changzhi	Shanxi	North	Male	1 y～	0 (0, 0)	0 (0, 0)	0 (0, 0)	0 (0, 0)	0 (0, 0)	0 (0, 0)	0 (0, 0)	0 (0, 0)	0 (0, 0)	0 (0, 0)	0 (0, 0)	0 (0, 0)	0 (0, 0)	0 (0, 0)	0 (0, 0)	1 (1, 1)	0 (0, 0)	0 (0, 0)	0 (0, 0)	0 (0, 0)	0 (0, 0)	0 (0, 0)	0 (0, 0)	0 (0, 0)	0 (0, 0)	0 (0, 0)	0 (0, 0)	1 (1, 1)
Changzhi	Shanxi	North	Male	5 y～	0 (0, 0)	0 (0, 0)	0 (0, 0)	0 (0, 0)	0 (0, 0)	0 (0, 0)	0 (0, 0)	0 (0, 0)	0 (0, 0)	0 (0, 0)	0 (0, 0)	0 (0, 0)	0 (0, 0)	0 (0, 0)	0 (0, 0)	0 (0, 0)	0 (0, 0)	0 (0, 0)	0 (0, 0)	0 (0, 0)	0 (0, 0)	0 (0, 0)	0 (0, 0)	0 (0, 0)	0 (0, 0)	0 (0, 0)	0 (0, 0)	0 (0, 0)
Changzhi	Shanxi	North	Male	10 y～	0 (0, 0)	0 (0, 0)	0 (0, 0)	0 (0, 0)	0 (0, 0)	0 (0, 0)	0 (0, 0)	0 (0, 0)	0 (0, 0)	0 (0, 0)	0 (0, 0)	0 (0, 0)	0 (0, 0)	0 (0, 0)	0 (0, 0)	0 (0, 0)	0 (0, 0)	0 (0, 0)	0 (0, 0)	0 (0, 0)	0 (0, 0)	0 (0, 0)	0 (0, 0)	0 (0, 0)	0 (0, 0)	0 (0, 0)	0 (0, 0)	0 (0, 0)
Changzhi	Shanxi	North	Male	15 y～	0 (0, 0)	0 (0, 0)	0 (0, 0)	1 (1, 1)	0 (0, 0)	0 (0, 0)	0 (0, 0)	0 (0, 0)	0 (0, 0)	0 (0, 0)	0 (0, 0)	0 (0, 0)	0 (0, 0)	0 (0, 0)	0 (0, 0)	0 (0, 0)	0 (0, 0)	0 (0, 0)	0 (0, 0)	0 (0, 0)	0 (0, 0)	0 (0, 0)	0 (0, 0)	0 (0, 0)	1 (0, 1)	1 (0, 1)	0 (0, 0)	1 (1, 1)
Changzhi	Shanxi	North	Male	20 y～	0 (0, 0)	0 (0, 0)	0 (0, 0)	1 (1, 1)	0 (0, 0)	0 (0, 0)	0 (0, 0)	0 (0, 0)	0 (0, 0)	0 (0, 0)	0 (0, 0)	0 (0, 0)	0 (0, 0)	0 (0, 0)	0 (0, 0)	0 (0, 0)	0 (0, 0)	0 (0, 0)	0 (0, 0)	0 (0, 0)	0 (0, 0)	0 (0, 0)	0 (0, 0)	0 (0, 0)	1 (1, 1)	1 (1, 1)	0 (0, 0)	2 (1, 2)
Changzhi	Shanxi	North	Male	25 y～	0 (0, 0)	0 (0, 0)	0 (0, 0)	1 (1, 1)	0 (0, 0)	0 (0, 0)	0 (0, 0)	0 (0, 0)	0 (0, 0)	0 (0, 0)	0 (0, 0)	0 (0, 0)	0 (0, 0)	0 (0, 0)	0 (0, 0)	0 (0, 0)	0 (0, 0)	0 (0, 0)	0 (0, 0)	0 (0, 0)	0 (0, 0)	0 (0, 0)	0 (0, 0)	1 (1, 1)	1 (1, 1)	1 (1, 1)	0 (0, 0)	2 (2, 2)
Changzhi	Shanxi	North	Male	30 y～	1 (1, 1)	1 (1, 1)	0 (0, 0)	3 (2, 3)	0 (0, 0)	0 (0, 0)	0 (0, 0)	0 (0, 0)	0 (0, 0)	0 (0, 0)	0 (0, 0)	0 (0, 0)	0 (0, 0)	0 (0, 0)	0 (0, 0)	0 (0, 1)	0 (0, 0)	0 (0, 0)	0 (0, 0)	0 (0, 0)	1 (1, 1)	1 (1, 1)	0 (0, 0)	2 (2, 2)	2 (2, 3)	2 (2, 3)	1 (1, 1)	5 (5, 6)
Changzhi	Shanxi	North	Male	35 y～	3 (2, 3)	3 (2, 3)	1 (1, 1)	6 (5, 7)	0 (0, 0)	0 (0, 0)	0 (0, 0)	0 (0, 0)	0 (0, 1)	0 (0, 1)	0 (0, 0)	1 (1, 1)	0 (0, 0)	0 (0, 0)	0 (0, 0)	0 (0, 1)	0 (0, 0)	0 (0, 0)	0 (0, 0)	0 (0, 0)	2 (2, 2)	2 (2, 2)	1 (1, 1)	4 (4, 5)	5 (5, 6)	5 (4, 6)	2 (2, 2)	12 (11, 14)
Changzhi	Shanxi	North	Male	40 y～	5 (4, 5)	5 (4, 5)	2 (2, 2)	12 (10, 13)	0 (0, 0)	0 (0, 0)	0 (0, 0)	0 (0, 0)	1 (1, 1)	1 (1, 1)	0 (0, 0)	2 (1, 2)	0 (0, 1)	0 (0, 0)	0 (0, 0)	1 (1, 1)	0 (0, 0)	0 (0, 0)	0 (0, 0)	0 (0, 0)	4 (3, 4)	4 (3, 4)	1 (1, 2)	9 (8, 10)	10 (9, 12)	10 (9, 11)	4 (3, 4)	24 (21, 27)
Changzhi	Shanxi	North	Male	45 y～	6 (6, 7)	6 (5, 6)	3 (2, 3)	15 (13, 16)	0 (0, 0)	0 (0, 0)	0 (0, 0)	1 (0, 1)	1 (1, 2)	1 (1, 1)	1 (0, 1)	3 (2, 4)	0 (0, 0)	0 (0, 0)	0 (0, 0)	1 (1, 1)	0 (0, 0)	0 (0, 0)	0 (0, 0)	1 (0, 1)	6 (5, 7)	5 (5, 6)	2 (2, 3)	14 (12, 16)	15 (13, 17)	13 (11, 14)	6 (5, 7)	34 (29, 37)
Changzhi	Shanxi	North	Male	50 y～	7 (6, 8)	7 (6, 7)	3 (3, 3)	17 (15, 19)	0 (0, 1)	0 (0, 0)	0 (0, 0)	1 (1, 1)	3 (2, 4)	2 (2, 3)	1 (1, 1)	6 (5, 8)	1 (0, 1)	0 (0, 1)	0 (0, 0)	1 (1, 2)	0 (0, 0)	0 (0, 0)	0 (0, 0)	1 (0, 1)	7 (6, 8)	7 (6, 7)	3 (3, 3)	17 (15, 19)	19 (16, 22)	17 (14, 19)	8 (7, 9)	43 (37, 49)
Changzhi	Shanxi	North	Male	55 y～	13 (11, 14)	11 (10, 12)	5 (5, 6)	29 (25, 32)	1 (1, 2)	1 (1, 1)	1 (0, 1)	3 (3, 3)	7 (5, 9)	6 (4, 7)	3 (2, 3)	15 (11, 18)	1 (1, 1)	1 (1, 1)	0 (0, 0)	2 (2, 3)	1 (1, 1)	1 (0, 1)	0 (0, 0)	1 (1, 2)	13 (11, 15)	11 (10, 13)	5 (5, 6)	30 (26, 33)	36 (30, 41)	31 (26, 35)	14 (12, 16)	81 (68, 92)
Changzhi	Shanxi	North	Male	60 y～	10 (9, 11)	10 (8, 10)	4 (3, 4)	24 (20, 26)	2 (2, 2)	2 (1, 2)	1 (1, 1)	5 (4, 5)	8 (6, 10)	6 (4, 7)	3 (2, 4)	18 (13, 21)	1 (1, 2)	1 (1, 1)	0 (0, 1)	3 (2, 3)	1 (0, 1)	0 (0, 0)	0 (0, 0)	1 (1, 1)	12 (10, 14)	11 (10, 13)	5 (4, 5)	28 (24, 31)	35 (29, 40)	29 (25, 34)	13 (11, 15)	77 (64, 89)
Changzhi	Shanxi	North	Male	65 y～	10 (9, 11)	10 (8, 10)	4 (3, 4)	24 (20, 26)	3 (3, 4)	2 (2, 3)	1 (1, 1)	6 (5, 7)	9 (7, 11)	7 (5, 8)	4 (3, 4)	19 (15, 24)	2 (1, 2)	1 (1, 1)	1 (1, 1)	4 (3, 4)	1 (1, 1)	0 (0, 1)	0 (0, 0)	1 (1, 2)	13 (11, 15)	12 (10, 14)	5 (4, 6)	30 (26, 34)	38 (31, 44)	32 (27, 37)	15 (12, 17)	84 (70, 97)
Changzhi	Shanxi	North	Male	70 y～	12 (10, 14)	11 (9, 13)	5 (4, 5)	28 (23, 32)	6 (5, 7)	4 (4, 5)	2 (2, 3)	12 (11, 14)	10 (8, 13)	7 (6, 9)	4 (3, 5)	22 (17, 27)	3 (2, 3)	2 (1, 2)	1 (1, 1)	5 (4, 7)	1 (1, 1)	1 (0, 1)	0 (0, 0)	2 (1, 2)	17 (14, 19)	16 (14, 18)	7 (6, 7)	39 (34, 44)	49 (40, 57)	41 (34, 47)	19 (16, 22)	109 (90, 126)
Changzhi	Shanxi	North	Male	75 y～	15 (12, 17)	14 (11, 16)	6 (5, 7)	34 (28, 39)	9 (8, 11)	7 (6, 8)	4 (3, 4)	20 (17, 23)	10 (8, 13)	7 (5, 9)	4 (3, 5)	22 (16, 26)	4 (3, 5)	3 (2, 4)	2 (1, 2)	8 (7, 10)	1 (1, 1)	1 (1, 1)	0 (0, 0)	2 (2, 3)	19 (17, 22)	18 (15, 20)	8 (6, 8)	45 (39, 50)	59 (48, 68)	49 (41, 57)	23 (19, 26)	131 (108, 151)
Changzhi	Shanxi	North	Male	80 y～	11 (9, 13)	11 (9, 12)	4 (3, 5)	26 (21, 29)	8 (7, 9)	7 (6, 9)	3 (3, 4)	19 (16, 21)	5 (4, 6)	5 (3, 6)	2 (2, 2)	12 (9, 14)	4 (3, 5)	4 (3, 5)	2 (1, 2)	10 (7, 12)	1 (1, 1)	1 (0, 1)	0 (0, 0)	2 (1, 2)	13 (11, 15)	13 (11, 14)	5 (4, 6)	31 (26, 35)	42 (34, 48)	40 (33, 46)	16 (14, 19)	98 (81, 113)
Changzhi	Shanxi	North	Male	85 y～	10 (8, 11)	10 (8, 11)	4 (3, 4)	23 (19, 27)	8 (7, 9)	8 (6, 9)	3 (3, 4)	19 (16, 22)	3 (2, 4)	3 (2, 3)	1 (1, 1)	7 (5, 8)	6 (5, 8)	6 (5, 7)	3 (2, 3)	15 (12, 18)	1 (0, 1)	0 (0, 1)	0 (0, 0)	1 (1, 1)	9 (8, 10)	9 (7, 10)	3 (3, 4)	21 (18, 24)	37 (30, 43)	35 (29, 41)	15 (12, 17)	86 (71, 101)
Changzhi	Shanxi	North	Female	0 y～	0 (0, 0)	0 (0, 0)	0 (0, 0)	0 (0, 0)	0 (0, 0)	0 (0, 0)	0 (0, 0)	0 (0, 0)	0 (0, 0)	0 (0, 0)	0 (0, 0)	0 (0, 0)	0 (0, 0)	0 (0, 0)	0 (0, 0)	1 (1, 1)	0 (0, 0)	0 (0, 0)	0 (0, 0)	0 (0, 0)	0 (0, 0)	0 (0, 0)	0 (0, 0)	0 (0, 0)	0 (0, 0)	0 (0, 0)	0 (0, 0)	1 (1, 1)
Changzhi	Shanxi	North	Female	1 y～	0 (0, 0)	0 (0, 0)	0 (0, 0)	0 (0, 0)	0 (0, 0)	0 (0, 0)	0 (0, 0)	0 (0, 0)	0 (0, 0)	0 (0, 0)	0 (0, 0)	0 (0, 0)	0 (0, 0)	0 (0, 0)	0 (0, 0)	1 (0, 1)	0 (0, 0)	0 (0, 0)	0 (0, 0)	0 (0, 0)	0 (0, 0)	0 (0, 0)	0 (0, 0)	0 (0, 0)	0 (0, 0)	0 (0, 0)	0 (0, 0)	1 (0, 1)
Changzhi	Shanxi	North	Female	5 y～	0 (0, 0)	0 (0, 0)	0 (0, 0)	0 (0, 0)	0 (0, 0)	0 (0, 0)	0 (0, 0)	0 (0, 0)	0 (0, 0)	0 (0, 0)	0 (0, 0)	0 (0, 0)	0 (0, 0)	0 (0, 0)	0 (0, 0)	0 (0, 0)	0 (0, 0)	0 (0, 0)	0 (0, 0)	0 (0, 0)	0 (0, 0)	0 (0, 0)	0 (0, 0)	0 (0, 0)	0 (0, 0)	0 (0, 0)	0 (0, 0)	0 (0, 0)
Changzhi	Shanxi	North	Female	10 y～	0 (0, 0)	0 (0, 0)	0 (0, 0)	0 (0, 0)	0 (0, 0)	0 (0, 0)	0 (0, 0)	0 (0, 0)	0 (0, 0)	0 (0, 0)	0 (0, 0)	0 (0, 0)	0 (0, 0)	0 (0, 0)	0 (0, 0)	0 (0, 0)	0 (0, 0)	0 (0, 0)	0 (0, 0)	0 (0, 0)	0 (0, 0)	0 (0, 0)	0 (0, 0)	0 (0, 0)	0 (0, 0)	0 (0, 0)	0 (0, 0)	0 (0, 0)
Changzhi	Shanxi	North	Female	15 y～	0 (0, 0)	0 (0, 0)	0 (0, 0)	0 (0, 0)	0 (0, 0)	0 (0, 0)	0 (0, 0)	0 (0, 0)	0 (0, 0)	0 (0, 0)	0 (0, 0)	0 (0, 0)	0 (0, 0)	0 (0, 0)	0 (0, 0)	0 (0, 0)	0 (0, 0)	0 (0, 0)	0 (0, 0)	0 (0, 0)	0 (0, 0)	0 (0, 0)	0 (0, 0)	0 (0, 0)	0 (0, 0)	0 (0, 0)	0 (0, 0)	1 (1, 1)
Changzhi	Shanxi	North	Female	20 y～	0 (0, 0)	0 (0, 0)	0 (0, 0)	0 (0, 0)	0 (0, 0)	0 (0, 0)	0 (0, 0)	0 (0, 0)	0 (0, 0)	0 (0, 0)	0 (0, 0)	0 (0, 0)	0 (0, 0)	0 (0, 0)	0 (0, 0)	0 (0, 0)	0 (0, 0)	0 (0, 0)	0 (0, 0)	0 (0, 0)	0 (0, 0)	0 (0, 0)	0 (0, 0)	0 (0, 0)	0 (0, 0)	0 (0, 0)	0 (0, 0)	1 (0, 1)
Changzhi	Shanxi	North	Female	25 y～	0 (0, 0)	0 (0, 0)	0 (0, 0)	0 (0, 0)	0 (0, 0)	0 (0, 0)	0 (0, 0)	0 (0, 0)	0 (0, 0)	0 (0, 0)	0 (0, 0)	0 (0, 0)	0 (0, 0)	0 (0, 0)	0 (0, 0)	0 (0, 0)	0 (0, 0)	0 (0, 0)	0 (0, 0)	0 (0, 0)	0 (0, 0)	0 (0, 0)	0 (0, 0)	0 (0, 0)	0 (0, 0)	0 (0, 0)	0 (0, 0)	1 (1, 1)
Changzhi	Shanxi	North	Female	30 y～	0 (0, 0)	0 (0, 0)	0 (0, 0)	1 (0, 1)	0 (0, 0)	0 (0, 0)	0 (0, 0)	0 (0, 0)	0 (0, 0)	0 (0, 0)	0 (0, 0)	0 (0, 0)	0 (0, 0)	0 (0, 0)	0 (0, 0)	0 (0, 0)	0 (0, 0)	0 (0, 0)	0 (0, 0)	0 (0, 0)	0 (0, 0)	0 (0, 0)	0 (0, 0)	1 (1, 1)	1 (1, 1)	1 (1, 1)	0 (0, 0)	1 (1, 2)
Changzhi	Shanxi	North	Female	35 y～	1 (1, 1)	1 (1, 1)	0 (0, 0)	2 (1, 2)	0 (0, 0)	0 (0, 0)	0 (0, 0)	0 (0, 0)	0 (0, 0)	0 (0, 0)	0 (0, 0)	1 (0, 1)	0 (0, 0)	0 (0, 0)	0 (0, 0)	0 (0, 0)	0 (0, 0)	0 (0, 0)	0 (0, 0)	0 (0, 0)	0 (0, 0)	0 (0, 0)	0 (0, 0)	1 (1, 1)	1 (1, 1)	2 (1, 2)	0 (0, 0)	3 (3, 4)
Changzhi	Shanxi	North	Female	40 y～	1 (1, 1)	1 (1, 1)	0 (0, 0)	2 (2, 3)	0 (0, 0)	0 (0, 0)	0 (0, 0)	0 (0, 0)	0 (0, 0)	0 (0, 1)	0 (0, 0)	1 (1, 1)	0 (0, 0)	0 (0, 0)	0 (0, 0)	0 (0, 0)	0 (0, 0)	0 (0, 0)	0 (0, 0)	0 (0, 0)	1 (1, 1)	1 (1, 1)	0 (0, 0)	3 (2, 3)	2 (2, 3)	3 (3, 4)	1 (1, 1)	6 (5, 7)
Changzhi	Shanxi	North	Female	45 y～	1 (1, 1)	2 (1, 2)	0 (0, 0)	3 (3, 4)	0 (0, 0)	0 (0, 0)	0 (0, 0)	0 (0, 0)	1 (1, 1)	1 (1, 1)	0 (0, 0)	2 (1, 2)	0 (0, 0)	0 (0, 0)	0 (0, 0)	1 (1, 1)	0 (0, 0)	0 (0, 0)	0 (0, 0)	0 (0, 0)	2 (1, 2)	2 (2, 2)	0 (0, 0)	4 (4, 4)	4 (3, 5)	5 (5, 6)	1 (1, 1)	10 (9, 12)
Changzhi	Shanxi	North	Female	50 y～	2 (2, 2)	2 (2, 3)	0 (0, 1)	5 (4, 5)	0 (0, 0)	0 (0, 0)	0 (0, 0)	0 (0, 0)	1 (1, 1)	2 (1, 2)	0 (0, 0)	3 (2, 3)	0 (0, 0)	0 (0, 0)	0 (0, 0)	0 (0, 1)	0 (0, 0)	0 (0, 0)	0 (0, 0)	0 (0, 0)	2 (2, 3)	3 (2, 3)	1 (0, 1)	6 (5, 6)	5 (5, 6)	7 (6, 8)	1 (1, 2)	14 (12, 16)
Changzhi	Shanxi	North	Female	55 y～	3 (3, 4)	4 (4, 5)	1 (1, 1)	9 (7, 9)	0 (0, 0)	1 (0, 1)	0 (0, 0)	1 (1, 1)	2 (1, 2)	3 (2, 4)	0 (0, 1)	5 (4, 6)	0 (0, 0)	1 (0, 1)	0 (0, 0)	1 (1, 1)	0 (0, 0)	0 (0, 0)	0 (0, 0)	1 (0, 1)	3 (3, 4)	4 (4, 5)	1 (1, 1)	8 (7, 9)	9 (8, 11)	13 (11, 15)	2 (2, 3)	24 (20, 28)
Changzhi	Shanxi	North	Female	60 y～	4 (3, 4)	5 (4, 5)	1 (1, 1)	9 (8, 10)	0 (0, 1)	1 (1, 1)	0 (0, 0)	1 (1, 1)	2 (1, 2)	3 (2, 3)	1 (0, 1)	5 (4, 6)	0 (0, 0)	1 (0, 1)	0 (0, 0)	1 (1, 1)	0 (0, 0)	0 (0, 0)	0 (0, 0)	1 (1, 1)	4 (4, 5)	5 (4, 6)	1 (1, 1)	10 (9, 11)	11 (9, 12)	14 (12, 16)	3 (2, 3)	27 (23, 31)
Changzhi	Shanxi	North	Female	65 y～	5 (4, 6)	6 (5, 7)	1 (1, 1)	13 (11, 14)	1 (1, 1)	1 (1, 1)	0 (0, 0)	2 (2, 3)	2 (2, 3)	3 (3, 4)	1 (0, 1)	6 (5, 8)	1 (0, 1)	1 (1, 1)	0 (0, 0)	2 (1, 2)	0 (0, 0)	1 (0, 1)	0 (0, 0)	1 (1, 1)	5 (5, 6)	7 (6, 8)	1 (1, 2)	14 (12, 15)	15 (12, 17)	19 (16, 22)	4 (3, 4)	37 (31, 43)
Changzhi	Shanxi	North	Female	70 y～	7 (6, 8)	9 (8, 11)	2 (1, 2)	19 (15, 21)	2 (1, 2)	2 (2, 3)	0 (0, 1)	4 (4, 5)	3 (2, 3)	4 (3, 5)	1 (1, 1)	7 (6, 9)	1 (1, 1)	1 (1, 2)	0 (0, 0)	3 (2, 3)	1 (0, 1)	1 (1, 1)	0 (0, 0)	2 (1, 2)	8 (7, 9)	11 (9, 12)	2 (2, 2)	21 (18, 24)	22 (18, 25)	29 (24, 33)	6 (5, 6)	56 (46, 64)
Changzhi	Shanxi	North	Female	75 y～	11 (9, 13)	14 (12, 16)	3 (2, 3)	28 (23, 32)	3 (3, 4)	4 (4, 5)	1 (1, 1)	8 (7, 10)	4 (3, 4)	5 (4, 6)	1 (1, 1)	10 (7, 12)	2 (2, 3)	3 (2, 4)	1 (0, 1)	6 (4, 7)	1 (1, 1)	1 (1, 2)	0 (0, 0)	3 (2, 3)	13 (11, 14)	16 (14, 18)	3 (3, 4)	32 (28, 36)	34 (28, 39)	44 (37, 51)	9 (7, 10)	87 (72, 100)
Changzhi	Shanxi	North	Female	80 y～	12 (9, 13)	14 (12, 16)	3 (2, 3)	29 (23, 33)	4 (3, 5)	5 (4, 6)	1 (1, 1)	11 (9, 12)	3 (2, 3)	3 (3, 4)	1 (1, 1)	7 (5, 9)	3 (2, 4)	4 (3, 5)	1 (1, 1)	7 (6, 9)	1 (1, 1)	1 (1, 1)	0 (0, 0)	2 (2, 2)	11 (10, 13)	14 (12, 16)	3 (2, 3)	28 (24, 32)	33 (27, 39)	42 (34, 48)	9 (7, 10)	84 (69, 97)
Changzhi	Shanxi	North	Female	85 y～	14 (11, 16)	18 (14, 20)	4 (3, 4)	35 (28, 41)	7 (6, 8)	8 (7, 10)	2 (2, 2)	17 (14, 20)	2 (1, 2)	2 (2, 3)	1 (0, 1)	5 (4, 6)	6 (4, 7)	7 (6, 9)	2 (1, 2)	15 (11, 19)	1 (1, 1)	1 (1, 1)	0 (0, 0)	2 (1, 2)	11 (9, 13)	14 (12, 16)	3 (2, 3)	28 (23, 31)	40 (33, 47)	50 (41, 59)	11 (9, 13)	101 (83, 118)
Alxa League	Inner Mongolia	Northeast	Male	0 y～	0 (0, 0)	0 (0, 0)	0 (0, 0)	0 (0, 0)	0 (0, 0)	0 (0, 0)	0 (0, 0)	0 (0, 0)	0 (0, 0)	0 (0, 0)	0 (0, 0)	0 (0, 0)	0 (0, 0)	0 (0, 0)	0 (0, 0)	0 (0, 0)	0 (0, 0)	0 (0, 0)	0 (0, 0)	0 (0, 0)	0 (0, 0)	0 (0, 0)	0 (0, 0)	0 (0, 0)	0 (0, 0)	0 (0, 0)	0 (0, 0)	0 (0, 0)
Alxa League	Inner Mongolia	Northeast	Male	1 y～	0 (0, 0)	0 (0, 0)	0 (0, 0)	0 (0, 0)	0 (0, 0)	0 (0, 0)	0 (0, 0)	0 (0, 0)	0 (0, 0)	0 (0, 0)	0 (0, 0)	0 (0, 0)	0 (0, 0)	0 (0, 0)	0 (0, 0)	0 (0, 0)	0 (0, 0)	0 (0, 0)	0 (0, 0)	0 (0, 0)	0 (0, 0)	0 (0, 0)	0 (0, 0)	0 (0, 0)	0 (0, 0)	0 (0, 0)	0 (0, 0)	0 (0, 0)
Alxa League	Inner Mongolia	Northeast	Male	5 y～	0 (0, 0)	0 (0, 0)	0 (0, 0)	0 (0, 0)	0 (0, 0)	0 (0, 0)	0 (0, 0)	0 (0, 0)	0 (0, 0)	0 (0, 0)	0 (0, 0)	0 (0, 0)	0 (0, 0)	0 (0, 0)	0 (0, 0)	0 (0, 0)	0 (0, 0)	0 (0, 0)	0 (0, 0)	0 (0, 0)	0 (0, 0)	0 (0, 0)	0 (0, 0)	0 (0, 0)	0 (0, 0)	0 (0, 0)	0 (0, 0)	0 (0, 0)
Alxa League	Inner Mongolia	Northeast	Male	10 y～	0 (0, 0)	0 (0, 0)	0 (0, 0)	0 (0, 0)	0 (0, 0)	0 (0, 0)	0 (0, 0)	0 (0, 0)	0 (0, 0)	0 (0, 0)	0 (0, 0)	0 (0, 0)	0 (0, 0)	0 (0, 0)	0 (0, 0)	0 (0, 0)	0 (0, 0)	0 (0, 0)	0 (0, 0)	0 (0, 0)	0 (0, 0)	0 (0, 0)	0 (0, 0)	0 (0, 0)	0 (0, 0)	0 (0, 0)	0 (0, 0)	0 (0, 0)
Alxa League	Inner Mongolia	Northeast	Male	15 y～	0 (0, 0)	0 (0, 0)	0 (0, 0)	0 (0, 0)	0 (0, 0)	0 (0, 0)	0 (0, 0)	0 (0, 0)	0 (0, 0)	0 (0, 0)	0 (0, 0)	0 (0, 0)	0 (0, 0)	0 (0, 0)	0 (0, 0)	0 (0, 0)	0 (0, 0)	0 (0, 0)	0 (0, 0)	0 (0, 0)	0 (0, 0)	0 (0, 0)	0 (0, 0)	0 (0, 0)	0 (0, 0)	0 (0, 0)	0 (0, 0)	0 (0, 0)
Alxa League	Inner Mongolia	Northeast	Male	20 y～	0 (0, 0)	0 (0, 0)	0 (0, 0)	0 (0, 0)	0 (0, 0)	0 (0, 0)	0 (0, 0)	0 (0, 0)	0 (0, 0)	0 (0, 0)	0 (0, 0)	0 (0, 0)	0 (0, 0)	0 (0, 0)	0 (0, 0)	0 (0, 0)	0 (0, 0)	0 (0, 0)	0 (0, 0)	0 (0, 0)	0 (0, 0)	0 (0, 0)	0 (0, 0)	0 (0, 0)	0 (0, 0)	0 (0, 0)	0 (0, 0)	0 (0, 0)
Alxa League	Inner Mongolia	Northeast	Male	25 y～	0 (0, 0)	0 (0, 0)	0 (0, 0)	0 (0, 0)	0 (0, 0)	0 (0, 0)	0 (0, 0)	0 (0, 0)	0 (0, 0)	0 (0, 0)	0 (0, 0)	0 (0, 0)	0 (0, 0)	0 (0, 0)	0 (0, 0)	0 (0, 0)	0 (0, 0)	0 (0, 0)	0 (0, 0)	0 (0, 0)	0 (0, 0)	0 (0, 0)	0 (0, 0)	0 (0, 0)	0 (0, 0)	0 (0, 0)	0 (0, 0)	0 (0, 0)
Alxa League	Inner Mongolia	Northeast	Male	30 y～	0 (0, 0)	0 (0, 0)	0 (0, 0)	1 (1, 1)	0 (0, 0)	0 (0, 0)	0 (0, 0)	0 (0, 0)	0 (0, 0)	0 (0, 0)	0 (0, 0)	0 (0, 0)	0 (0, 0)	0 (0, 0)	0 (0, 0)	0 (0, 0)	0 (0, 0)	0 (0, 0)	0 (0, 0)	0 (0, 0)	0 (0, 0)	0 (0, 0)	0 (0, 0)	0 (0, 0)	0 (0, 0)	1 (0, 1)	0 (0, 0)	1 (1, 1)
Alxa League	Inner Mongolia	Northeast	Male	35 y～	0 (0, 0)	1 (1, 1)	0 (0, 0)	1 (1, 1)	0 (0, 0)	0 (0, 0)	0 (0, 0)	0 (0, 0)	0 (0, 0)	0 (0, 0)	0 (0, 0)	0 (0, 0)	0 (0, 0)	0 (0, 0)	0 (0, 0)	0 (0, 0)	0 (0, 0)	0 (0, 0)	0 (0, 0)	0 (0, 0)	0 (0, 0)	0 (0, 0)	0 (0, 0)	1 (1, 1)	1 (1, 1)	1 (1, 1)	1 (0, 1)	2 (2, 3)
Alxa League	Inner Mongolia	Northeast	Male	40 y～	1 (1, 1)	1 (1, 1)	1 (0, 1)	3 (2, 3)	0 (0, 0)	0 (0, 0)	0 (0, 0)	0 (0, 0)	0 (0, 0)	0 (0, 0)	0 (0, 0)	0 (0, 0)	0 (0, 0)	0 (0, 0)	0 (0, 0)	0 (0, 0)	0 (0, 0)	0 (0, 0)	0 (0, 0)	0 (0, 0)	0 (0, 1)	1 (1, 1)	0 (0, 0)	2 (1, 2)	1 (1, 1)	2 (2, 3)	1 (1, 1)	5 (4, 5)
Alxa League	Inner Mongolia	Northeast	Male	45 y～	1 (1, 1)	2 (1, 2)	1 (1, 1)	3 (3, 4)	0 (0, 0)	0 (0, 0)	0 (0, 0)	0 (0, 0)	0 (0, 0)	0 (0, 0)	0 (0, 0)	0 (0, 0)	0 (0, 0)	0 (0, 0)	0 (0, 0)	0 (0, 0)	0 (0, 0)	0 (0, 0)	0 (0, 0)	0 (0, 0)	1 (1, 1)	1 (1, 1)	1 (1, 1)	2 (2, 3)	2 (2, 2)	3 (2, 3)	2 (1, 2)	6 (5, 7)
Alxa League	Inner Mongolia	Northeast	Male	50 y～	1 (1, 1)	2 (1, 2)	1 (1, 1)	4 (3, 4)	0 (0, 0)	0 (0, 0)	0 (0, 0)	0 (0, 0)	0 (0, 0)	0 (0, 0)	0 (0, 0)	1 (1, 1)	0 (0, 0)	0 (0, 0)	0 (0, 0)	0 (0, 0)	0 (0, 0)	0 (0, 0)	0 (0, 0)	0 (0, 0)	1 (1, 1)	1 (1, 2)	1 (1, 1)	3 (3, 3)	2 (2, 3)	4 (3, 4)	2 (2, 2)	8 (7, 9)
Alxa League	Inner Mongolia	Northeast	Male	55 y～	2 (1, 2)	3 (2, 3)	1 (1, 2)	6 (5, 7)	0 (0, 0)	0 (0, 0)	0 (0, 0)	0 (0, 1)	1 (0, 1)	1 (1, 1)	0 (0, 0)	2 (1, 2)	0 (0, 0)	0 (0, 0)	0 (0, 0)	0 (0, 0)	0 (0, 0)	0 (0, 0)	0 (0, 0)	0 (0, 0)	1 (1, 2)	2 (2, 3)	1 (1, 1)	5 (4, 5)	4 (3, 5)	6 (5, 7)	3 (3, 4)	13 (11, 15)
Alxa League	Inner Mongolia	Northeast	Male	60 y～	1 (1, 1)	2 (2, 2)	1 (1, 1)	4 (4, 5)	0 (0, 0)	0 (0, 0)	0 (0, 0)	1 (1, 1)	1 (0, 1)	1 (1, 1)	0 (0, 1)	2 (1, 2)	0 (0, 0)	0 (0, 0)	0 (0, 0)	0 (0, 0)	0 (0, 0)	0 (0, 0)	0 (0, 0)	0 (0, 0)	1 (1, 1)	2 (2, 2)	1 (1, 1)	4 (4, 5)	3 (3, 4)	5 (4, 6)	3 (2, 3)	11 (9, 13)
Alxa League	Inner Mongolia	Northeast	Male	65 y～	1 (1, 1)	2 (2, 2)	1 (1, 1)	4 (4, 5)	0 (0, 0)	0 (0, 0)	0 (0, 0)	1 (1, 1)	1 (1, 1)	1 (1, 1)	0 (0, 1)	2 (2, 2)	0 (0, 0)	0 (0, 0)	0 (0, 0)	0 (0, 0)	0 (0, 0)	0 (0, 0)	0 (0, 0)	0 (0, 0)	1 (1, 1)	2 (2, 2)	1 (1, 1)	4 (4, 5)	4 (3, 4)	6 (5, 7)	3 (2, 3)	12 (10, 14)
Alxa League	Inner Mongolia	Northeast	Male	70 y～	2 (1, 2)	3 (2, 3)	1 (1, 2)	6 (5, 7)	1 (1, 1)	1 (1, 1)	0 (0, 1)	2 (2, 2)	1 (1, 1)	1 (1, 1)	1 (0, 1)	2 (2, 3)	0 (0, 0)	0 (0, 0)	0 (0, 0)	1 (0, 1)	0 (0, 0)	0 (0, 0)	0 (0, 0)	0 (0, 0)	2 (2, 2)	3 (3, 3)	1 (1, 2)	6 (5, 7)	5 (4, 6)	8 (7, 9)	4 (3, 5)	17 (14, 20)
Alxa League	Inner Mongolia	Northeast	Male	75 y～	2 (1, 2)	3 (2, 3)	1 (1, 2)	6 (5, 7)	1 (1, 1)	1 (1, 1)	1 (1, 1)	3 (2, 3)	1 (1, 1)	1 (1, 1)	1 (0, 1)	2 (2, 3)	0 (0, 0)	0 (0, 0)	0 (0, 0)	1 (1, 1)	0 (0, 0)	0 (0, 0)	0 (0, 0)	0 (0, 0)	2 (2, 2)	3 (3, 4)	2 (1, 2)	7 (6, 7)	6 (5, 7)	9 (7, 10)	4 (4, 5)	19 (15, 22)
Alxa League	Inner Mongolia	Northeast	Male	80 y～	1 (1, 2)	2 (2, 3)	1 (1, 1)	5 (4, 5)	1 (1, 1)	1 (1, 1)	1 (1, 1)	3 (2, 3)	0 (0, 0)	1 (0, 1)	0 (0, 0)	1 (1, 1)	0 (0, 0)	0 (0, 0)	0 (0, 0)	1 (1, 1)	0 (0, 0)	0 (0, 0)	0 (0, 0)	0 (0, 0)	1 (1, 1)	2 (2, 3)	1 (1, 1)	5 (4, 5)	4 (3, 5)	7 (6, 8)	3 (3, 4)	14 (12, 16)
Alxa League	Inner Mongolia	Northeast	Male	85 y～	1 (1, 1)	2 (2, 2)	1 (1, 1)	4 (3, 5)	1 (1, 1)	1 (1, 2)	1 (1, 1)	3 (2, 3)	0 (0, 0)	0 (0, 0)	0 (0, 0)	1 (1, 1)	0 (0, 0)	1 (0, 1)	0 (0, 0)	1 (1, 2)	0 (0, 0)	0 (0, 0)	0 (0, 0)	0 (0, 0)	1 (1, 1)	2 (1, 2)	1 (1, 1)	3 (3, 4)	4 (3, 4)	6 (5, 7)	3 (2, 3)	12 (10, 15)
Alxa League	Inner Mongolia	Northeast	Female	0 y～	0 (0, 0)	0 (0, 0)	0 (0, 0)	0 (0, 0)	0 (0, 0)	0 (0, 0)	0 (0, 0)	0 (0, 0)	0 (0, 0)	0 (0, 0)	0 (0, 0)	0 (0, 0)	0 (0, 0)	0 (0, 0)	0 (0, 0)	0 (0, 0)	0 (0, 0)	0 (0, 0)	0 (0, 0)	0 (0, 0)	0 (0, 0)	0 (0, 0)	0 (0, 0)	0 (0, 0)	0 (0, 0)	0 (0, 0)	0 (0, 0)	0 (0, 0)
Alxa League	Inner Mongolia	Northeast	Female	1 y～	0 (0, 0)	0 (0, 0)	0 (0, 0)	0 (0, 0)	0 (0, 0)	0 (0, 0)	0 (0, 0)	0 (0, 0)	0 (0, 0)	0 (0, 0)	0 (0, 0)	0 (0, 0)	0 (0, 0)	0 (0, 0)	0 (0, 0)	0 (0, 0)	0 (0, 0)	0 (0, 0)	0 (0, 0)	0 (0, 0)	0 (0, 0)	0 (0, 0)	0 (0, 0)	0 (0, 0)	0 (0, 0)	0 (0, 0)	0 (0, 0)	0 (0, 0)
Alxa League	Inner Mongolia	Northeast	Female	5 y～	0 (0, 0)	0 (0, 0)	0 (0, 0)	0 (0, 0)	0 (0, 0)	0 (0, 0)	0 (0, 0)	0 (0, 0)	0 (0, 0)	0 (0, 0)	0 (0, 0)	0 (0, 0)	0 (0, 0)	0 (0, 0)	0 (0, 0)	0 (0, 0)	0 (0, 0)	0 (0, 0)	0 (0, 0)	0 (0, 0)	0 (0, 0)	0 (0, 0)	0 (0, 0)	0 (0, 0)	0 (0, 0)	0 (0, 0)	0 (0, 0)	0 (0, 0)
Alxa League	Inner Mongolia	Northeast	Female	10 y～	0 (0, 0)	0 (0, 0)	0 (0, 0)	0 (0, 0)	0 (0, 0)	0 (0, 0)	0 (0, 0)	0 (0, 0)	0 (0, 0)	0 (0, 0)	0 (0, 0)	0 (0, 0)	0 (0, 0)	0 (0, 0)	0 (0, 0)	0 (0, 0)	0 (0, 0)	0 (0, 0)	0 (0, 0)	0 (0, 0)	0 (0, 0)	0 (0, 0)	0 (0, 0)	0 (0, 0)	0 (0, 0)	0 (0, 0)	0 (0, 0)	0 (0, 0)
Alxa League	Inner Mongolia	Northeast	Female	15 y～	0 (0, 0)	0 (0, 0)	0 (0, 0)	0 (0, 0)	0 (0, 0)	0 (0, 0)	0 (0, 0)	0 (0, 0)	0 (0, 0)	0 (0, 0)	0 (0, 0)	0 (0, 0)	0 (0, 0)	0 (0, 0)	0 (0, 0)	0 (0, 0)	0 (0, 0)	0 (0, 0)	0 (0, 0)	0 (0, 0)	0 (0, 0)	0 (0, 0)	0 (0, 0)	0 (0, 0)	0 (0, 0)	0 (0, 0)	0 (0, 0)	0 (0, 0)
Alxa League	Inner Mongolia	Northeast	Female	20 y～	0 (0, 0)	0 (0, 0)	0 (0, 0)	0 (0, 0)	0 (0, 0)	0 (0, 0)	0 (0, 0)	0 (0, 0)	0 (0, 0)	0 (0, 0)	0 (0, 0)	0 (0, 0)	0 (0, 0)	0 (0, 0)	0 (0, 0)	0 (0, 0)	0 (0, 0)	0 (0, 0)	0 (0, 0)	0 (0, 0)	0 (0, 0)	0 (0, 0)	0 (0, 0)	0 (0, 0)	0 (0, 0)	0 (0, 0)	0 (0, 0)	0 (0, 0)
Alxa League	Inner Mongolia	Northeast	Female	25 y～	0 (0, 0)	0 (0, 0)	0 (0, 0)	0 (0, 0)	0 (0, 0)	0 (0, 0)	0 (0, 0)	0 (0, 0)	0 (0, 0)	0 (0, 0)	0 (0, 0)	0 (0, 0)	0 (0, 0)	0 (0, 0)	0 (0, 0)	0 (0, 0)	0 (0, 0)	0 (0, 0)	0 (0, 0)	0 (0, 0)	0 (0, 0)	0 (0, 0)	0 (0, 0)	0 (0, 0)	0 (0, 0)	0 (0, 0)	0 (0, 0)	0 (0, 0)
Alxa League	Inner Mongolia	Northeast	Female	30 y～	0 (0, 0)	0 (0, 0)	0 (0, 0)	0 (0, 0)	0 (0, 0)	0 (0, 0)	0 (0, 0)	0 (0, 0)	0 (0, 0)	0 (0, 0)	0 (0, 0)	0 (0, 0)	0 (0, 0)	0 (0, 0)	0 (0, 0)	0 (0, 0)	0 (0, 0)	0 (0, 0)	0 (0, 0)	0 (0, 0)	0 (0, 0)	0 (0, 0)	0 (0, 0)	0 (0, 0)	0 (0, 0)	0 (0, 0)	0 (0, 0)	0 (0, 0)
Alxa League	Inner Mongolia	Northeast	Female	35 y～	0 (0, 0)	0 (0, 0)	0 (0, 0)	0 (0, 0)	0 (0, 0)	0 (0, 0)	0 (0, 0)	0 (0, 0)	0 (0, 0)	0 (0, 0)	0 (0, 0)	0 (0, 0)	0 (0, 0)	0 (0, 0)	0 (0, 0)	0 (0, 0)	0 (0, 0)	0 (0, 0)	0 (0, 0)	0 (0, 0)	0 (0, 0)	0 (0, 0)	0 (0, 0)	0 (0, 0)	0 (0, 0)	0 (0, 0)	0 (0, 0)	1 (0, 1)
Alxa League	Inner Mongolia	Northeast	Female	40 y～	0 (0, 0)	0 (0, 0)	0 (0, 0)	1 (0, 1)	0 (0, 0)	0 (0, 0)	0 (0, 0)	0 (0, 0)	0 (0, 0)	0 (0, 0)	0 (0, 0)	0 (0, 0)	0 (0, 0)	0 (0, 0)	0 (0, 0)	0 (0, 0)	0 (0, 0)	0 (0, 0)	0 (0, 0)	0 (0, 0)	0 (0, 0)	0 (0, 0)	0 (0, 0)	0 (0, 0)	0 (0, 0)	1 (1, 1)	0 (0, 0)	1 (1, 1)
Alxa League	Inner Mongolia	Northeast	Female	45 y～	0 (0, 0)	0 (0, 0)	0 (0, 0)	1 (1, 1)	0 (0, 0)	0 (0, 0)	0 (0, 0)	0 (0, 0)	0 (0, 0)	0 (0, 0)	0 (0, 0)	0 (0, 0)	0 (0, 0)	0 (0, 0)	0 (0, 0)	0 (0, 0)	0 (0, 0)	0 (0, 0)	0 (0, 0)	0 (0, 0)	0 (0, 0)	0 (0, 0)	0 (0, 0)	1 (1, 1)	0 (0, 1)	1 (1, 1)	0 (0, 0)	2 (2, 2)
Alxa League	Inner Mongolia	Northeast	Female	50 y～	0 (0, 0)	1 (1, 1)	0 (0, 0)	1 (1, 1)	0 (0, 0)	0 (0, 0)	0 (0, 0)	0 (0, 0)	0 (0, 0)	0 (0, 0)	0 (0, 0)	0 (0, 0)	0 (0, 0)	0 (0, 0)	0 (0, 0)	0 (0, 0)	0 (0, 0)	0 (0, 0)	0 (0, 0)	0 (0, 0)	0 (0, 0)	1 (1, 1)	0 (0, 0)	1 (1, 1)	1 (1, 1)	2 (1, 2)	0 (0, 0)	3 (2, 3)
Alxa League	Inner Mongolia	Northeast	Female	55 y～	0 (0, 1)	1 (1, 1)	0 (0, 0)	2 (1, 2)	0 (0, 0)	0 (0, 0)	0 (0, 0)	0 (0, 0)	0 (0, 0)	0 (0, 0)	0 (0, 0)	1 (0, 1)	0 (0, 0)	0 (0, 0)	0 (0, 0)	0 (0, 0)	0 (0, 0)	0 (0, 0)	0 (0, 0)	0 (0, 0)	0 (0, 0)	1 (1, 1)	0 (0, 0)	1 (1, 2)	1 (1, 1)	3 (2, 3)	1 (0, 1)	4 (3, 5)
Alxa League	Inner Mongolia	Northeast	Female	60 y～	0 (0, 1)	1 (1, 1)	0 (0, 0)	2 (1, 2)	0 (0, 0)	0 (0, 0)	0 (0, 0)	0 (0, 0)	0 (0, 0)	0 (0, 0)	0 (0, 0)	1 (0, 1)	0 (0, 0)	0 (0, 0)	0 (0, 0)	0 (0, 0)	0 (0, 0)	0 (0, 0)	0 (0, 0)	0 (0, 0)	0 (0, 0)	1 (1, 1)	0 (0, 0)	2 (1, 2)	1 (1, 1)	3 (2, 3)	1 (1, 1)	4 (4, 5)
Alxa League	Inner Mongolia	Northeast	Female	65 y～	1 (1, 1)	2 (1, 2)	0 (0, 0)	3 (2, 3)	0 (0, 0)	0 (0, 0)	0 (0, 0)	0 (0, 0)	0 (0, 0)	0 (0, 1)	0 (0, 0)	1 (1, 1)	0 (0, 0)	0 (0, 0)	0 (0, 0)	0 (0, 0)	0 (0, 0)	0 (0, 0)	0 (0, 0)	0 (0, 0)	1 (0, 1)	1 (1, 2)	0 (0, 0)	2 (2, 3)	2 (1, 2)	4 (3, 4)	1 (1, 1)	6 (5, 7)
Alxa League	Inner Mongolia	Northeast	Female	70 y～	1 (1, 1)	2 (2, 3)	1 (0, 1)	4 (3, 5)	0 (0, 0)	0 (0, 1)	0 (0, 0)	1 (1, 1)	0 (0, 0)	1 (0, 1)	0 (0, 0)	1 (1, 1)	0 (0, 0)	0 (0, 0)	0 (0, 0)	0 (0, 0)	0 (0, 0)	0 (0, 0)	0 (0, 0)	0 (0, 0)	1 (1, 1)	2 (2, 2)	1 (0, 1)	4 (3, 4)	2 (2, 3)	6 (5, 7)	1 (1, 2)	10 (8, 11)
Alxa League	Inner Mongolia	Northeast	Female	75 y～	1 (1, 1)	3 (2, 3)	1 (1, 1)	5 (4, 6)	0 (0, 0)	1 (1, 1)	0 (0, 0)	1 (1, 1)	0 (0, 0)	1 (0, 1)	0 (0, 0)	1 (1, 1)	0 (0, 0)	0 (0, 0)	0 (0, 0)	0 (0, 1)	0 (0, 0)	0 (0, 0)	0 (0, 0)	0 (0, 0)	1 (1, 1)	3 (2, 3)	1 (1, 1)	4 (4, 5)	3 (3, 4)	7 (6, 9)	2 (1, 2)	12 (10, 14)
Alxa League	Inner Mongolia	Northeast	Female	80 y～	1 (1, 1)	2 (2, 3)	1 (0, 1)	4 (3, 5)	0 (0, 0)	1 (1, 1)	0 (0, 0)	1 (1, 1)	0 (0, 0)	0 (0, 0)	0 (0, 0)	1 (0, 1)	0 (0, 0)	0 (0, 0)	0 (0, 0)	0 (0, 1)	0 (0, 0)	0 (0, 0)	0 (0, 0)	0 (0, 0)	1 (1, 1)	2 (2, 2)	0 (0, 1)	3 (3, 4)	3 (2, 3)	6 (5, 7)	1 (1, 2)	10 (8, 11)
Alxa League	Inner Mongolia	Northeast	Female	85 y～	1 (1, 1)	3 (2, 3)	1 (1, 1)	5 (4, 6)	0 (0, 1)	1 (1, 1)	0 (0, 0)	2 (2, 2)	0 (0, 0)	0 (0, 0)	0 (0, 0)	0 (0, 0)	0 (0, 0)	1 (0, 1)	0 (0, 0)	1 (1, 1)	0 (0, 0)	0 (0, 0)	0 (0, 0)	0 (0, 0)	1 (1, 1)	2 (1, 2)	0 (0, 0)	3 (2, 3)	3 (2, 3)	6 (5, 8)	2 (1, 2)	11 (9, 13)
Bayan Nur	Inner Mongolia	Northeast	Male	0 y～	0 (0, 0)	0 (0, 0)	0 (0, 0)	0 (0, 0)	0 (0, 0)	0 (0, 0)	0 (0, 0)	0 (0, 0)	0 (0, 0)	0 (0, 0)	0 (0, 0)	0 (0, 0)	0 (0, 0)	0 (0, 0)	0 (0, 0)	0 (0, 0)	0 (0, 0)	0 (0, 0)	0 (0, 0)	0 (0, 0)	0 (0, 0)	0 (0, 0)	0 (0, 0)	0 (0, 0)	0 (0, 0)	0 (0, 0)	0 (0, 0)	0 (0, 0)
Bayan Nur	Inner Mongolia	Northeast	Male	1 y～	0 (0, 0)	0 (0, 0)	0 (0, 0)	0 (0, 0)	0 (0, 0)	0 (0, 0)	0 (0, 0)	0 (0, 0)	0 (0, 0)	0 (0, 0)	0 (0, 0)	0 (0, 0)	0 (0, 0)	0 (0, 0)	0 (0, 0)	0 (0, 0)	0 (0, 0)	0 (0, 0)	0 (0, 0)	0 (0, 0)	0 (0, 0)	0 (0, 0)	0 (0, 0)	0 (0, 0)	0 (0, 0)	0 (0, 0)	0 (0, 0)	0 (0, 0)
Bayan Nur	Inner Mongolia	Northeast	Male	5 y～	0 (0, 0)	0 (0, 0)	0 (0, 0)	0 (0, 0)	0 (0, 0)	0 (0, 0)	0 (0, 0)	0 (0, 0)	0 (0, 0)	0 (0, 0)	0 (0, 0)	0 (0, 0)	0 (0, 0)	0 (0, 0)	0 (0, 0)	0 (0, 0)	0 (0, 0)	0 (0, 0)	0 (0, 0)	0 (0, 0)	0 (0, 0)	0 (0, 0)	0 (0, 0)	0 (0, 0)	0 (0, 0)	0 (0, 0)	0 (0, 0)	0 (0, 0)
Bayan Nur	Inner Mongolia	Northeast	Male	10 y～	0 (0, 0)	0 (0, 0)	0 (0, 0)	0 (0, 0)	0 (0, 0)	0 (0, 0)	0 (0, 0)	0 (0, 0)	0 (0, 0)	0 (0, 0)	0 (0, 0)	0 (0, 0)	0 (0, 0)	0 (0, 0)	0 (0, 0)	0 (0, 0)	0 (0, 0)	0 (0, 0)	0 (0, 0)	0 (0, 0)	0 (0, 0)	0 (0, 0)	0 (0, 0)	0 (0, 0)	0 (0, 0)	0 (0, 0)	0 (0, 0)	0 (0, 0)
Bayan Nur	Inner Mongolia	Northeast	Male	15 y～	0 (0, 0)	0 (0, 0)	0 (0, 0)	0 (0, 0)	0 (0, 0)	0 (0, 0)	0 (0, 0)	0 (0, 0)	0 (0, 0)	0 (0, 0)	0 (0, 0)	0 (0, 0)	0 (0, 0)	0 (0, 0)	0 (0, 0)	0 (0, 0)	0 (0, 0)	0 (0, 0)	0 (0, 0)	0 (0, 0)	0 (0, 0)	0 (0, 0)	0 (0, 0)	0 (0, 0)	0 (0, 0)	0 (0, 0)	0 (0, 0)	0 (0, 0)
Bayan Nur	Inner Mongolia	Northeast	Male	20 y～	0 (0, 0)	0 (0, 0)	0 (0, 0)	0 (0, 0)	0 (0, 0)	0 (0, 0)	0 (0, 0)	0 (0, 0)	0 (0, 0)	0 (0, 0)	0 (0, 0)	0 (0, 0)	0 (0, 0)	0 (0, 0)	0 (0, 0)	0 (0, 0)	0 (0, 0)	0 (0, 0)	0 (0, 0)	0 (0, 0)	0 (0, 0)	0 (0, 0)	0 (0, 0)	0 (0, 0)	0 (0, 0)	0 (0, 0)	0 (0, 0)	1 (1, 1)
Bayan Nur	Inner Mongolia	Northeast	Male	25 y～	0 (0, 0)	0 (0, 0)	0 (0, 0)	1 (0, 1)	0 (0, 0)	0 (0, 0)	0 (0, 0)	0 (0, 0)	0 (0, 0)	0 (0, 0)	0 (0, 0)	0 (0, 0)	0 (0, 0)	0 (0, 0)	0 (0, 0)	0 (0, 0)	0 (0, 0)	0 (0, 0)	0 (0, 0)	0 (0, 0)	0 (0, 0)	0 (0, 0)	0 (0, 0)	0 (0, 0)	0 (0, 0)	0 (0, 1)	0 (0, 0)	1 (1, 1)
Bayan Nur	Inner Mongolia	Northeast	Male	30 y～	1 (0, 1)	1 (1, 1)	0 (0, 0)	2 (1, 2)	0 (0, 0)	0 (0, 0)	0 (0, 0)	0 (0, 0)	0 (0, 0)	0 (0, 0)	0 (0, 0)	0 (0, 0)	0 (0, 0)	0 (0, 0)	0 (0, 0)	0 (0, 0)	0 (0, 0)	0 (0, 0)	0 (0, 0)	0 (0, 0)	0 (0, 0)	0 (0, 0)	0 (0, 0)	1 (1, 1)	1 (1, 1)	1 (1, 2)	1 (0, 1)	3 (2, 3)
Bayan Nur	Inner Mongolia	Northeast	Male	35 y～	1 (1, 1)	2 (1, 2)	1 (1, 1)	4 (3, 4)	0 (0, 0)	0 (0, 0)	0 (0, 0)	0 (0, 0)	0 (0, 0)	0 (0, 0)	0 (0, 0)	0 (0, 0)	0 (0, 0)	0 (0, 0)	0 (0, 0)	0 (0, 0)	0 (0, 0)	0 (0, 0)	0 (0, 0)	0 (0, 0)	1 (1, 1)	1 (1, 1)	0 (0, 0)	2 (2, 2)	2 (2, 2)	3 (3, 3)	1 (1, 1)	6 (5, 7)
Bayan Nur	Inner Mongolia	Northeast	Male	40 y～	2 (2, 2)	3 (3, 4)	1 (1, 2)	7 (6, 8)	0 (0, 0)	0 (0, 0)	0 (0, 0)	0 (0, 0)	0 (0, 0)	0 (0, 0)	0 (0, 0)	1 (0, 1)	0 (0, 0)	0 (0, 0)	0 (0, 0)	0 (0, 0)	0 (0, 0)	0 (0, 0)	0 (0, 0)	0 (0, 0)	1 (1, 2)	2 (2, 2)	1 (1, 1)	4 (4, 5)	4 (3, 4)	6 (5, 7)	2 (2, 3)	13 (11, 14)
Bayan Nur	Inner Mongolia	Northeast	Male	45 y～	3 (2, 3)	4 (3, 4)	2 (2, 2)	9 (7, 10)	0 (0, 0)	0 (0, 0)	0 (0, 0)	0 (0, 0)	0 (0, 0)	0 (0, 1)	0 (0, 0)	1 (1, 1)	0 (0, 0)	0 (0, 0)	0 (0, 0)	0 (0, 0)	0 (0, 0)	0 (0, 0)	0 (0, 0)	0 (0, 0)	2 (2, 2)	3 (3, 3)	1 (1, 2)	7 (6, 7)	6 (5, 6)	8 (7, 9)	4 (3, 4)	17 (15, 19)
Bayan Nur	Inner Mongolia	Northeast	Male	50 y～	3 (3, 4)	5 (4, 5)	2 (2, 2)	10 (8, 11)	0 (0, 0)	0 (0, 0)	0 (0, 0)	0 (0, 1)	1 (1, 1)	1 (1, 1)	0 (0, 1)	2 (2, 2)	0 (0, 0)	0 (0, 0)	0 (0, 0)	0 (0, 0)	0 (0, 0)	0 (0, 0)	0 (0, 0)	0 (0, 0)	3 (2, 3)	4 (3, 4)	2 (2, 2)	8 (7, 9)	7 (6, 8)	9 (8, 11)	5 (4, 5)	21 (18, 24)
Bayan Nur	Inner Mongolia	Northeast	Male	55 y～	5 (4, 6)	7 (6, 8)	4 (3, 4)	16 (13, 18)	0 (0, 1)	1 (0, 1)	0 (0, 0)	1 (1, 2)	2 (1, 2)	2 (1, 2)	1 (1, 1)	5 (3, 6)	0 (0, 0)	0 (0, 0)	0 (0, 0)	1 (0, 1)	0 (0, 0)	0 (0, 0)	0 (0, 0)	1 (0, 1)	4 (4, 5)	6 (5, 7)	3 (2, 3)	13 (11, 15)	12 (10, 13)	16 (14, 18)	8 (7, 9)	36 (30, 41)
Bayan Nur	Inner Mongolia	Northeast	Male	60 y～	4 (3, 4)	6 (5, 6)	2 (2, 3)	12 (10, 13)	1 (1, 1)	1 (1, 1)	0 (0, 0)	2 (1, 2)	2 (1, 2)	2 (2, 2)	1 (1, 1)	5 (4, 6)	0 (0, 0)	0 (0, 0)	0 (0, 0)	1 (0, 1)	0 (0, 0)	0 (0, 0)	0 (0, 0)	0 (0, 1)	4 (3, 4)	5 (5, 6)	2 (2, 3)	11 (10, 13)	10 (8, 12)	14 (12, 16)	6 (5, 7)	30 (25, 35)
Bayan Nur	Inner Mongolia	Northeast	Male	65 y～	4 (3, 4)	6 (5, 6)	2 (2, 3)	12 (10, 13)	1 (1, 1)	1 (1, 1)	1 (0, 1)	3 (2, 3)	2 (2, 2)	2 (2, 3)	1 (1, 1)	5 (4, 7)	0 (0, 0)	0 (0, 0)	0 (0, 0)	1 (1, 1)	0 (0, 0)	0 (0, 0)	0 (0, 0)	1 (0, 1)	4 (3, 4)	6 (5, 7)	2 (2, 3)	12 (10, 14)	11 (9, 13)	15 (13, 18)	7 (6, 8)	33 (27, 38)
Bayan Nur	Inner Mongolia	Northeast	Male	70 y～	5 (4, 6)	7 (6, 9)	3 (3, 4)	16 (13, 18)	2 (2, 2)	2 (2, 3)	1 (1, 1)	5 (5, 6)	2 (2, 3)	3 (2, 3)	1 (1, 2)	7 (5, 8)	1 (0, 1)	1 (0, 1)	0 (0, 0)	1 (1, 2)	0 (0, 0)	0 (0, 0)	0 (0, 0)	1 (1, 1)	5 (5, 6)	8 (7, 9)	4 (3, 4)	17 (15, 19)	16 (13, 18)	22 (18, 25)	10 (8, 11)	47 (39, 54)
Bayan Nur	Inner Mongolia	Northeast	Male	75 y～	5 (4, 6)	8 (6, 9)	3 (3, 4)	17 (14, 19)	3 (2, 3)	3 (3, 4)	2 (1, 2)	8 (7, 9)	2 (2, 3)	2 (2, 3)	1 (1, 1)	6 (4, 7)	1 (1, 1)	1 (1, 1)	0 (0, 0)	2 (1, 2)	0 (0, 0)	0 (0, 0)	0 (0, 0)	1 (1, 1)	6 (5, 6)	8 (7, 10)	4 (3, 4)	18 (15, 20)	17 (14, 20)	23 (19, 27)	11 (9, 12)	51 (42, 59)
Bayan Nur	Inner Mongolia	Northeast	Male	80 y～	4 (3, 5)	6 (5, 7)	2 (2, 3)	13 (10, 15)	2 (2, 3)	4 (3, 4)	1 (1, 2)	7 (6, 9)	1 (1, 1)	2 (1, 2)	1 (0, 1)	3 (2, 4)	1 (1, 1)	1 (1, 1)	0 (0, 1)	2 (2, 3)	0 (0, 0)	0 (0, 0)	0 (0, 0)	1 (0, 1)	4 (3, 4)	6 (5, 7)	2 (2, 3)	12 (10, 14)	12 (10, 14)	18 (15, 21)	7 (6, 9)	38 (31, 44)
Bayan Nur	Inner Mongolia	Northeast	Male	85 y～	4 (3, 4)	6 (5, 7)	2 (2, 3)	12 (9, 14)	2 (2, 3)	4 (3, 4)	1 (1, 2)	8 (6, 9)	1 (0, 1)	1 (1, 1)	0 (0, 0)	2 (1, 2)	1 (1, 1)	2 (1, 2)	1 (1, 1)	3 (3, 4)	0 (0, 0)	0 (0, 0)	0 (0, 0)	0 (0, 1)	3 (2, 3)	4 (3, 5)	2 (1, 2)	8 (7, 9)	11 (9, 12)	16 (13, 19)	7 (5, 8)	33 (27, 39)
Bayan Nur	Inner Mongolia	Northeast	Female	0 y～	0 (0, 0)	0 (0, 0)	0 (0, 0)	0 (0, 0)	0 (0, 0)	0 (0, 0)	0 (0, 0)	0 (0, 0)	0 (0, 0)	0 (0, 0)	0 (0, 0)	0 (0, 0)	0 (0, 0)	0 (0, 0)	0 (0, 0)	0 (0, 0)	0 (0, 0)	0 (0, 0)	0 (0, 0)	0 (0, 0)	0 (0, 0)	0 (0, 0)	0 (0, 0)	0 (0, 0)	0 (0, 0)	0 (0, 0)	0 (0, 0)	0 (0, 0)
Bayan Nur	Inner Mongolia	Northeast	Female	1 y～	0 (0, 0)	0 (0, 0)	0 (0, 0)	0 (0, 0)	0 (0, 0)	0 (0, 0)	0 (0, 0)	0 (0, 0)	0 (0, 0)	0 (0, 0)	0 (0, 0)	0 (0, 0)	0 (0, 0)	0 (0, 0)	0 (0, 0)	0 (0, 0)	0 (0, 0)	0 (0, 0)	0 (0, 0)	0 (0, 0)	0 (0, 0)	0 (0, 0)	0 (0, 0)	0 (0, 0)	0 (0, 0)	0 (0, 0)	0 (0, 0)	0 (0, 0)
Bayan Nur	Inner Mongolia	Northeast	Female	5 y～	0 (0, 0)	0 (0, 0)	0 (0, 0)	0 (0, 0)	0 (0, 0)	0 (0, 0)	0 (0, 0)	0 (0, 0)	0 (0, 0)	0 (0, 0)	0 (0, 0)	0 (0, 0)	0 (0, 0)	0 (0, 0)	0 (0, 0)	0 (0, 0)	0 (0, 0)	0 (0, 0)	0 (0, 0)	0 (0, 0)	0 (0, 0)	0 (0, 0)	0 (0, 0)	0 (0, 0)	0 (0, 0)	0 (0, 0)	0 (0, 0)	0 (0, 0)
Bayan Nur	Inner Mongolia	Northeast	Female	10 y～	0 (0, 0)	0 (0, 0)	0 (0, 0)	0 (0, 0)	0 (0, 0)	0 (0, 0)	0 (0, 0)	0 (0, 0)	0 (0, 0)	0 (0, 0)	0 (0, 0)	0 (0, 0)	0 (0, 0)	0 (0, 0)	0 (0, 0)	0 (0, 0)	0 (0, 0)	0 (0, 0)	0 (0, 0)	0 (0, 0)	0 (0, 0)	0 (0, 0)	0 (0, 0)	0 (0, 0)	0 (0, 0)	0 (0, 0)	0 (0, 0)	0 (0, 0)
Bayan Nur	Inner Mongolia	Northeast	Female	15 y～	0 (0, 0)	0 (0, 0)	0 (0, 0)	0 (0, 0)	0 (0, 0)	0 (0, 0)	0 (0, 0)	0 (0, 0)	0 (0, 0)	0 (0, 0)	0 (0, 0)	0 (0, 0)	0 (0, 0)	0 (0, 0)	0 (0, 0)	0 (0, 0)	0 (0, 0)	0 (0, 0)	0 (0, 0)	0 (0, 0)	0 (0, 0)	0 (0, 0)	0 (0, 0)	0 (0, 0)	0 (0, 0)	0 (0, 0)	0 (0, 0)	0 (0, 0)
Bayan Nur	Inner Mongolia	Northeast	Female	20 y～	0 (0, 0)	0 (0, 0)	0 (0, 0)	0 (0, 0)	0 (0, 0)	0 (0, 0)	0 (0, 0)	0 (0, 0)	0 (0, 0)	0 (0, 0)	0 (0, 0)	0 (0, 0)	0 (0, 0)	0 (0, 0)	0 (0, 0)	0 (0, 0)	0 (0, 0)	0 (0, 0)	0 (0, 0)	0 (0, 0)	0 (0, 0)	0 (0, 0)	0 (0, 0)	0 (0, 0)	0 (0, 0)	0 (0, 0)	0 (0, 0)	0 (0, 0)
Bayan Nur	Inner Mongolia	Northeast	Female	25 y～	0 (0, 0)	0 (0, 0)	0 (0, 0)	0 (0, 0)	0 (0, 0)	0 (0, 0)	0 (0, 0)	0 (0, 0)	0 (0, 0)	0 (0, 0)	0 (0, 0)	0 (0, 0)	0 (0, 0)	0 (0, 0)	0 (0, 0)	0 (0, 0)	0 (0, 0)	0 (0, 0)	0 (0, 0)	0 (0, 0)	0 (0, 0)	0 (0, 0)	0 (0, 0)	0 (0, 0)	0 (0, 0)	0 (0, 0)	0 (0, 0)	0 (0, 0)
Bayan Nur	Inner Mongolia	Northeast	Female	30 y～	0 (0, 0)	0 (0, 0)	0 (0, 0)	0 (0, 0)	0 (0, 0)	0 (0, 0)	0 (0, 0)	0 (0, 0)	0 (0, 0)	0 (0, 0)	0 (0, 0)	0 (0, 0)	0 (0, 0)	0 (0, 0)	0 (0, 0)	0 (0, 0)	0 (0, 0)	0 (0, 0)	0 (0, 0)	0 (0, 0)	0 (0, 0)	0 (0, 0)	0 (0, 0)	0 (0, 0)	0 (0, 0)	0 (0, 0)	0 (0, 0)	1 (1, 1)
Bayan Nur	Inner Mongolia	Northeast	Female	35 y～	0 (0, 0)	1 (0, 1)	0 (0, 0)	1 (1, 1)	0 (0, 0)	0 (0, 0)	0 (0, 0)	0 (0, 0)	0 (0, 0)	0 (0, 0)	0 (0, 0)	0 (0, 0)	0 (0, 0)	0 (0, 0)	0 (0, 0)	0 (0, 0)	0 (0, 0)	0 (0, 0)	0 (0, 0)	0 (0, 0)	0 (0, 0)	0 (0, 0)	0 (0, 0)	0 (0, 0)	0 (0, 0)	1 (1, 1)	0 (0, 0)	2 (1, 2)
Bayan Nur	Inner Mongolia	Northeast	Female	40 y～	0 (0, 0)	1 (1, 1)	0 (0, 0)	1 (1, 2)	0 (0, 0)	0 (0, 0)	0 (0, 0)	0 (0, 0)	0 (0, 0)	0 (0, 0)	0 (0, 0)	0 (0, 0)	0 (0, 0)	0 (0, 0)	0 (0, 0)	0 (0, 0)	0 (0, 0)	0 (0, 0)	0 (0, 0)	0 (0, 0)	0 (0, 0)	1 (1, 1)	0 (0, 0)	1 (1, 1)	1 (1, 1)	2 (1, 2)	0 (0, 0)	3 (3, 3)
Bayan Nur	Inner Mongolia	Northeast	Female	45 y～	1 (0, 1)	1 (1, 1)	0 (0, 0)	2 (2, 2)	0 (0, 0)	0 (0, 0)	0 (0, 0)	0 (0, 0)	0 (0, 0)	0 (0, 0)	0 (0, 0)	1 (0, 1)	0 (0, 0)	0 (0, 0)	0 (0, 0)	0 (0, 0)	0 (0, 0)	0 (0, 0)	0 (0, 0)	0 (0, 0)	1 (0, 1)	1 (1, 1)	0 (0, 0)	2 (2, 2)	1 (1, 2)	3 (2, 3)	1 (1, 1)	5 (4, 5)
Bayan Nur	Inner Mongolia	Northeast	Female	50 y～	1 (1, 1)	2 (1, 2)	0 (0, 0)	3 (2, 3)	0 (0, 0)	0 (0, 0)	0 (0, 0)	0 (0, 0)	0 (0, 0)	1 (0, 1)	0 (0, 0)	1 (1, 1)	0 (0, 0)	0 (0, 0)	0 (0, 0)	0 (0, 0)	0 (0, 0)	0 (0, 0)	0 (0, 0)	0 (0, 0)	1 (1, 1)	2 (1, 2)	0 (0, 0)	3 (2, 3)	2 (2, 2)	4 (3, 5)	1 (1, 1)	7 (6, 8)
Bayan Nur	Inner Mongolia	Northeast	Female	55 y～	1 (1, 2)	3 (2, 3)	1 (1, 1)	5 (4, 5)	0 (0, 0)	0 (0, 0)	0 (0, 0)	0 (0, 0)	0 (0, 0)	1 (1, 1)	0 (0, 0)	2 (1, 2)	0 (0, 0)	0 (0, 0)	0 (0, 0)	0 (0, 0)	0 (0, 0)	0 (0, 0)	0 (0, 0)	0 (0, 0)	1 (1, 1)	2 (2, 2)	0 (0, 1)	4 (3, 4)	3 (3, 4)	7 (6, 8)	1 (1, 2)	11 (9, 13)
Bayan Nur	Inner Mongolia	Northeast	Female	60 y～	1 (1, 2)	3 (2, 3)	1 (0, 1)	5 (4, 5)	0 (0, 0)	0 (0, 0)	0 (0, 0)	1 (0, 1)	0 (0, 0)	1 (1, 1)	0 (0, 0)	1 (1, 2)	0 (0, 0)	0 (0, 0)	0 (0, 0)	0 (0, 0)	0 (0, 0)	0 (0, 0)	0 (0, 0)	0 (0, 0)	1 (1, 1)	2 (2, 3)	1 (0, 1)	4 (4, 5)	3 (3, 4)	7 (6, 8)	1 (1, 2)	12 (10, 13)
Bayan Nur	Inner Mongolia	Northeast	Female	65 y～	2 (2, 2)	4 (3, 4)	1 (1, 1)	7 (6, 8)	0 (0, 0)	1 (1, 1)	0 (0, 0)	1 (1, 1)	0 (0, 1)	1 (1, 1)	0 (0, 0)	2 (1, 2)	0 (0, 0)	0 (0, 0)	0 (0, 0)	0 (0, 1)	0 (0, 0)	0 (0, 0)	0 (0, 0)	0 (0, 0)	2 (1, 2)	3 (3, 4)	1 (1, 1)	6 (5, 7)	5 (4, 5)	10 (8, 11)	2 (2, 2)	17 (14, 19)
Bayan Nur	Inner Mongolia	Northeast	Female	70 y～	3 (2, 4)	6 (5, 7)	1 (1, 2)	11 (9, 12)	0 (0, 1)	1 (1, 1)	0 (0, 0)	2 (2, 2)	1 (0, 1)	1 (1, 2)	0 (0, 0)	2 (2, 3)	0 (0, 0)	0 (0, 1)	0 (0, 0)	1 (1, 1)	0 (0, 0)	0 (0, 1)	0 (0, 0)	1 (1, 1)	3 (2, 3)	6 (5, 6)	1 (1, 1)	10 (8, 11)	7 (6, 8)	15 (13, 18)	3 (3, 4)	26 (21, 30)
Bayan Nur	Inner Mongolia	Northeast	Female	75 y～	4 (3, 4)	8 (6, 9)	2 (1, 2)	13 (11, 15)	1 (1, 1)	2 (2, 2)	0 (0, 0)	3 (3, 4)	1 (0, 1)	2 (1, 2)	0 (0, 0)	2 (2, 3)	0 (0, 0)	1 (1, 1)	0 (0, 0)	1 (1, 2)	0 (0, 0)	1 (0, 1)	0 (0, 0)	1 (1, 1)	4 (3, 4)	7 (6, 8)	2 (1, 2)	12 (10, 14)	9 (8, 11)	20 (16, 23)	4 (3, 5)	33 (27, 38)
Bayan Nur	Inner Mongolia	Northeast	Female	80 y～	3 (3, 4)	7 (5, 8)	1 (1, 2)	11 (9, 13)	1 (1, 1)	2 (2, 2)	0 (0, 1)	3 (3, 4)	0 (0, 1)	1 (1, 1)	0 (0, 0)	2 (1, 2)	0 (0, 0)	1 (1, 1)	0 (0, 0)	1 (1, 2)	0 (0, 0)	0 (0, 0)	0 (0, 0)	1 (0, 1)	3 (2, 3)	5 (4, 6)	1 (1, 1)	9 (7, 10)	8 (6, 9)	16 (13, 18)	3 (3, 4)	27 (22, 31)
Bayan Nur	Inner Mongolia	Northeast	Female	85 y～	4 (3, 4)	7 (6, 9)	2 (1, 2)	13 (10, 15)	1 (1, 2)	3 (2, 3)	1 (1, 1)	5 (4, 6)	0 (0, 0)	1 (0, 1)	0 (0, 0)	1 (1, 1)	1 (1, 1)	1 (1, 2)	0 (0, 0)	2 (2, 3)	0 (0, 0)	0 (0, 0)	0 (0, 0)	0 (0, 1)	2 (2, 3)	5 (4, 5)	1 (1, 1)	8 (7, 9)	9 (7, 10)	17 (14, 20)	4 (3, 5)	30 (24, 35)
Baitou	Inner Mongolia	Northeast	Male	0 y～	0 (0, 0)	0 (0, 0)	0 (0, 0)	0 (0, 0)	0 (0, 0)	0 (0, 0)	0 (0, 0)	0 (0, 0)	0 (0, 0)	0 (0, 0)	0 (0, 0)	0 (0, 0)	0 (0, 0)	0 (0, 0)	0 (0, 0)	0 (0, 1)	0 (0, 0)	0 (0, 0)	0 (0, 0)	0 (0, 0)	0 (0, 0)	0 (0, 0)	0 (0, 0)	0 (0, 0)	0 (0, 0)	0 (0, 0)	0 (0, 0)	0 (0, 1)
Baitou	Inner Mongolia	Northeast	Male	1 y～	0 (0, 0)	0 (0, 0)	0 (0, 0)	0 (0, 0)	0 (0, 0)	0 (0, 0)	0 (0, 0)	0 (0, 0)	0 (0, 0)	0 (0, 0)	0 (0, 0)	0 (0, 0)	0 (0, 0)	0 (0, 0)	0 (0, 0)	0 (0, 1)	0 (0, 0)	0 (0, 0)	0 (0, 0)	0 (0, 0)	0 (0, 0)	0 (0, 0)	0 (0, 0)	0 (0, 0)	0 (0, 0)	0 (0, 0)	0 (0, 0)	0 (0, 1)
Baitou	Inner Mongolia	Northeast	Male	5 y～	0 (0, 0)	0 (0, 0)	0 (0, 0)	0 (0, 0)	0 (0, 0)	0 (0, 0)	0 (0, 0)	0 (0, 0)	0 (0, 0)	0 (0, 0)	0 (0, 0)	0 (0, 0)	0 (0, 0)	0 (0, 0)	0 (0, 0)	0 (0, 0)	0 (0, 0)	0 (0, 0)	0 (0, 0)	0 (0, 0)	0 (0, 0)	0 (0, 0)	0 (0, 0)	0 (0, 0)	0 (0, 0)	0 (0, 0)	0 (0, 0)	0 (0, 0)
Baitou	Inner Mongolia	Northeast	Male	10 y～	0 (0, 0)	0 (0, 0)	0 (0, 0)	0 (0, 0)	0 (0, 0)	0 (0, 0)	0 (0, 0)	0 (0, 0)	0 (0, 0)	0 (0, 0)	0 (0, 0)	0 (0, 0)	0 (0, 0)	0 (0, 0)	0 (0, 0)	0 (0, 0)	0 (0, 0)	0 (0, 0)	0 (0, 0)	0 (0, 0)	0 (0, 0)	0 (0, 0)	0 (0, 0)	0 (0, 0)	0 (0, 0)	0 (0, 0)	0 (0, 0)	0 (0, 0)
Baitou	Inner Mongolia	Northeast	Male	15 y～	0 (0, 0)	0 (0, 0)	0 (0, 0)	1 (1, 1)	0 (0, 0)	0 (0, 0)	0 (0, 0)	0 (0, 0)	0 (0, 0)	0 (0, 0)	0 (0, 0)	0 (0, 0)	0 (0, 0)	0 (0, 0)	0 (0, 0)	0 (0, 0)	0 (0, 0)	0 (0, 0)	0 (0, 0)	0 (0, 0)	0 (0, 0)	0 (0, 0)	0 (0, 0)	0 (0, 0)	0 (0, 1)	1 (0, 1)	0 (0, 0)	1 (1, 1)
Baitou	Inner Mongolia	Northeast	Male	20 y～	1 (0, 1)	1 (0, 1)	0 (0, 0)	1 (1, 2)	0 (0, 0)	0 (0, 0)	0 (0, 0)	0 (0, 0)	0 (0, 0)	0 (0, 0)	0 (0, 0)	0 (0, 0)	0 (0, 0)	0 (0, 0)	0 (0, 0)	0 (0, 0)	0 (0, 0)	0 (0, 0)	0 (0, 0)	0 (0, 0)	0 (0, 0)	0 (0, 0)	0 (0, 0)	1 (0, 1)	1 (1, 1)	1 (1, 1)	0 (0, 1)	2 (2, 2)
Baitou	Inner Mongolia	Northeast	Male	25 y～	1 (1, 1)	1 (1, 1)	0 (0, 0)	2 (1, 2)	0 (0, 0)	0 (0, 0)	0 (0, 0)	0 (0, 0)	0 (0, 0)	0 (0, 0)	0 (0, 0)	0 (0, 0)	0 (0, 0)	0 (0, 0)	0 (0, 0)	0 (0, 0)	0 (0, 0)	0 (0, 0)	0 (0, 0)	0 (0, 0)	0 (0, 0)	0 (0, 0)	0 (0, 0)	1 (1, 1)	1 (1, 1)	1 (1, 1)	1 (1, 1)	3 (3, 3)
Baitou	Inner Mongolia	Northeast	Male	30 y～	2 (2, 2)	2 (2, 2)	1 (1, 1)	5 (4, 6)	0 (0, 0)	0 (0, 0)	0 (0, 0)	0 (0, 0)	0 (0, 0)	0 (0, 0)	0 (0, 0)	0 (0, 0)	0 (0, 0)	0 (0, 0)	0 (0, 0)	0 (0, 0)	0 (0, 0)	0 (0, 0)	0 (0, 0)	0 (0, 0)	1 (1, 1)	1 (1, 1)	1 (1, 1)	3 (3, 3)	3 (3, 4)	4 (3, 4)	2 (2, 2)	9 (8, 10)
Baitou	Inner Mongolia	Northeast	Male	35 y～	4 (4, 4)	4 (4, 5)	2 (2, 3)	11 (9, 12)	0 (0, 0)	0 (0, 0)	0 (0, 0)	0 (0, 0)	0 (0, 1)	0 (0, 0)	0 (0, 0)	1 (1, 1)	0 (0, 0)	0 (0, 0)	0 (0, 0)	0 (0, 0)	0 (0, 0)	0 (0, 0)	0 (0, 0)	0 (0, 0)	2 (2, 3)	3 (2, 3)	1 (1, 2)	7 (6, 7)	7 (6, 8)	8 (7, 9)	4 (4, 5)	19 (17, 22)
Baitou	Inner Mongolia	Northeast	Male	40 y～	8 (7, 9)	9 (8, 10)	5 (4, 5)	22 (19, 24)	0 (0, 0)	0 (0, 0)	0 (0, 0)	0 (0, 0)	1 (1, 1)	1 (0, 1)	0 (0, 0)	2 (1, 2)	0 (0, 0)	0 (0, 0)	0 (0, 0)	1 (1, 1)	0 (0, 0)	0 (0, 0)	0 (0, 0)	0 (0, 1)	5 (4, 6)	6 (5, 6)	3 (3, 3)	14 (12, 15)	15 (12, 16)	16 (13, 17)	9 (7, 10)	39 (33, 43)
Baitou	Inner Mongolia	Northeast	Male	45 y～	10 (9, 11)	10 (9, 11)	7 (6, 7)	27 (23, 30)	0 (0, 0)	0 (0, 0)	0 (0, 0)	1 (1, 1)	1 (1, 2)	1 (1, 1)	1 (1, 1)	3 (2, 4)	0 (0, 0)	0 (0, 0)	0 (0, 0)	1 (1, 1)	0 (0, 0)	0 (0, 0)	0 (0, 0)	1 (1, 1)	8 (7, 9)	8 (7, 9)	5 (4, 6)	21 (18, 23)	21 (17, 23)	19 (17, 22)	13 (11, 15)	53 (45, 59)
Baitou	Inner Mongolia	Northeast	Male	50 y～	12 (10, 13)	11 (10, 13)	8 (7, 8)	31 (26, 34)	1 (1, 1)	1 (0, 1)	0 (0, 0)	1 (1, 2)	3 (2, 3)	2 (2, 3)	1 (1, 2)	6 (5, 8)	0 (0, 1)	0 (0, 0)	0 (0, 0)	1 (1, 1)	0 (0, 0)	0 (0, 0)	0 (0, 0)	1 (1, 1)	9 (8, 11)	9 (8, 10)	6 (5, 7)	25 (21, 28)	25 (21, 28)	24 (20, 27)	16 (14, 18)	65 (55, 73)
Baitou	Inner Mongolia	Northeast	Male	55 y～	19 (16, 21)	18 (16, 20)	12 (10, 14)	50 (42, 55)	2 (1, 2)	1 (1, 2)	1 (1, 1)	4 (3, 5)	6 (5, 7)	5 (4, 6)	3 (3, 4)	14 (11, 17)	1 (1, 1)	1 (0, 1)	0 (0, 0)	2 (1, 2)	1 (1, 1)	1 (0, 1)	0 (0, 0)	2 (1, 2)	15 (13, 17)	15 (13, 17)	10 (9, 11)	40 (35, 45)	43 (37, 49)	41 (34, 46)	28 (23, 31)	112 (94, 126)
Baitou	Inner Mongolia	Northeast	Male	60 y～	14 (12, 15)	14 (12, 16)	9 (7, 10)	37 (31, 41)	2 (2, 3)	2 (2, 2)	1 (1, 1)	6 (5, 6)	7 (5, 8)	5 (4, 6)	3 (3, 4)	15 (11, 18)	1 (1, 1)	1 (0, 1)	0 (0, 1)	2 (1, 2)	1 (0, 1)	0 (0, 1)	0 (0, 0)	1 (1, 2)	13 (11, 15)	14 (12, 15)	8 (7, 9)	35 (30, 39)	37 (31, 43)	36 (30, 41)	22 (19, 25)	95 (80, 109)
Baitou	Inner Mongolia	Northeast	Male	65 y～	14 (12, 15)	14 (12, 16)	9 (7, 10)	37 (31, 41)	4 (3, 4)	3 (2, 3)	2 (2, 2)	8 (7, 9)	7 (6, 9)	6 (4, 7)	4 (3, 5)	17 (13, 20)	1 (1, 1)	1 (1, 1)	1 (0, 1)	3 (2, 3)	1 (1, 1)	1 (0, 1)	0 (0, 0)	2 (1, 2)	14 (12, 16)	15 (13, 17)	9 (8, 10)	38 (32, 43)	41 (34, 47)	39 (32, 44)	24 (20, 28)	104 (86, 119)
Baitou	Inner Mongolia	Northeast	Male	70 y～	18 (15, 21)	19 (16, 22)	11 (9, 13)	49 (40, 56)	7 (6, 9)	6 (5, 7)	4 (3, 5)	17 (14, 20)	9 (7, 11)	7 (5, 8)	5 (4, 6)	21 (16, 25)	2 (1, 2)	1 (1, 2)	1 (1, 1)	4 (3, 6)	1 (1, 1)	1 (1, 1)	1 (0, 1)	2 (2, 3)	20 (17, 23)	21 (18, 24)	13 (11, 14)	54 (46, 60)	58 (48, 67)	55 (45, 63)	34 (28, 40)	147 (121, 170)
Baitou	Inner Mongolia	Northeast	Male	75 y～	20 (16, 23)	21 (17, 24)	12 (10, 14)	53 (43, 61)	11 (9, 12)	8 (7, 10)	6 (5, 7)	25 (21, 29)	8 (6, 10)	6 (5, 8)	4 (3, 5)	19 (14, 23)	3 (2, 3)	2 (2, 3)	1 (1, 2)	6 (5, 8)	1 (1, 1)	1 (1, 1)	1 (0, 1)	3 (2, 3)	21 (18, 24)	22 (19, 25)	13 (11, 15)	56 (48, 63)	63 (52, 73)	60 (49, 69)	38 (31, 43)	161 (132, 186)
Baitou	Inner Mongolia	Northeast	Male	80 y～	15 (12, 17)	16 (13, 18)	9 (7, 10)	39 (32, 45)	9 (7, 10)	9 (8, 11)	5 (4, 6)	23 (20, 27)	4 (3, 5)	4 (3, 5)	2 (2, 3)	10 (7, 12)	3 (2, 3)	3 (2, 3)	1 (1, 2)	7 (5, 9)	1 (1, 1)	1 (1, 1)	0 (0, 0)	2 (1, 2)	14 (12, 16)	15 (13, 17)	9 (7, 10)	38 (32, 43)	44 (37, 51)	48 (40, 56)	26 (22, 31)	119 (98, 138)
Baitou	Inner Mongolia	Northeast	Male	85 y～	14 (11, 16)	15 (12, 17)	8 (7, 9)	36 (29, 42)	9 (8, 10)	10 (8, 11)	5 (4, 6)	24 (20, 28)	2 (2, 3)	2 (2, 3)	1 (1, 2)	6 (5, 7)	4 (3, 5)	4 (3, 5)	2 (2, 3)	11 (8, 13)	1 (0, 1)	1 (0, 1)	0 (0, 0)	1 (1, 2)	10 (8, 11)	11 (9, 12)	6 (5, 7)	26 (22, 30)	39 (32, 45)	42 (35, 49)	23 (19, 27)	104 (86, 122)
Baitou	Inner Mongolia	Northeast	Female	0 y～	0 (0, 0)	0 (0, 0)	0 (0, 0)	0 (0, 0)	0 (0, 0)	0 (0, 0)	0 (0, 0)	0 (0, 0)	0 (0, 0)	0 (0, 0)	0 (0, 0)	0 (0, 0)	0 (0, 0)	0 (0, 0)	0 (0, 0)	0 (0, 1)	0 (0, 0)	0 (0, 0)	0 (0, 0)	0 (0, 0)	0 (0, 0)	0 (0, 0)	0 (0, 0)	0 (0, 0)	0 (0, 0)	0 (0, 0)	0 (0, 0)	0 (0, 1)
Baitou	Inner Mongolia	Northeast	Female	1 y～	0 (0, 0)	0 (0, 0)	0 (0, 0)	0 (0, 0)	0 (0, 0)	0 (0, 0)	0 (0, 0)	0 (0, 0)	0 (0, 0)	0 (0, 0)	0 (0, 0)	0 (0, 0)	0 (0, 0)	0 (0, 0)	0 (0, 0)	0 (0, 0)	0 (0, 0)	0 (0, 0)	0 (0, 0)	0 (0, 0)	0 (0, 0)	0 (0, 0)	0 (0, 0)	0 (0, 0)	0 (0, 0)	0 (0, 0)	0 (0, 0)	0 (0, 0)
Baitou	Inner Mongolia	Northeast	Female	5 y～	0 (0, 0)	0 (0, 0)	0 (0, 0)	0 (0, 0)	0 (0, 0)	0 (0, 0)	0 (0, 0)	0 (0, 0)	0 (0, 0)	0 (0, 0)	0 (0, 0)	0 (0, 0)	0 (0, 0)	0 (0, 0)	0 (0, 0)	0 (0, 0)	0 (0, 0)	0 (0, 0)	0 (0, 0)	0 (0, 0)	0 (0, 0)	0 (0, 0)	0 (0, 0)	0 (0, 0)	0 (0, 0)	0 (0, 0)	0 (0, 0)	0 (0, 0)
Baitou	Inner Mongolia	Northeast	Female	10 y～	0 (0, 0)	0 (0, 0)	0 (0, 0)	0 (0, 0)	0 (0, 0)	0 (0, 0)	0 (0, 0)	0 (0, 0)	0 (0, 0)	0 (0, 0)	0 (0, 0)	0 (0, 0)	0 (0, 0)	0 (0, 0)	0 (0, 0)	0 (0, 0)	0 (0, 0)	0 (0, 0)	0 (0, 0)	0 (0, 0)	0 (0, 0)	0 (0, 0)	0 (0, 0)	0 (0, 0)	0 (0, 0)	0 (0, 0)	0 (0, 0)	0 (0, 0)
Baitou	Inner Mongolia	Northeast	Female	15 y～	0 (0, 0)	0 (0, 0)	0 (0, 0)	0 (0, 0)	0 (0, 0)	0 (0, 0)	0 (0, 0)	0 (0, 0)	0 (0, 0)	0 (0, 0)	0 (0, 0)	0 (0, 0)	0 (0, 0)	0 (0, 0)	0 (0, 0)	0 (0, 0)	0 (0, 0)	0 (0, 0)	0 (0, 0)	0 (0, 0)	0 (0, 0)	0 (0, 0)	0 (0, 0)	0 (0, 0)	0 (0, 0)	0 (0, 0)	0 (0, 0)	1 (1, 1)
Baitou	Inner Mongolia	Northeast	Female	20 y～	0 (0, 0)	0 (0, 0)	0 (0, 0)	0 (0, 0)	0 (0, 0)	0 (0, 0)	0 (0, 0)	0 (0, 0)	0 (0, 0)	0 (0, 0)	0 (0, 0)	0 (0, 0)	0 (0, 0)	0 (0, 0)	0 (0, 0)	0 (0, 0)	0 (0, 0)	0 (0, 0)	0 (0, 0)	0 (0, 0)	0 (0, 0)	0 (0, 0)	0 (0, 0)	0 (0, 0)	0 (0, 0)	0 (0, 0)	0 (0, 0)	1 (1, 1)
Baitou	Inner Mongolia	Northeast	Female	25 y～	0 (0, 0)	0 (0, 0)	0 (0, 0)	1 (0, 1)	0 (0, 0)	0 (0, 0)	0 (0, 0)	0 (0, 0)	0 (0, 0)	0 (0, 0)	0 (0, 0)	0 (0, 0)	0 (0, 0)	0 (0, 0)	0 (0, 0)	0 (0, 0)	0 (0, 0)	0 (0, 0)	0 (0, 0)	0 (0, 0)	0 (0, 0)	0 (0, 0)	0 (0, 0)	0 (0, 1)	0 (0, 0)	1 (0, 1)	0 (0, 0)	1 (1, 1)
Baitou	Inner Mongolia	Northeast	Female	30 y～	0 (0, 0)	0 (0, 1)	0 (0, 0)	1 (1, 1)	0 (0, 0)	0 (0, 0)	0 (0, 0)	0 (0, 0)	0 (0, 0)	0 (0, 0)	0 (0, 0)	0 (0, 0)	0 (0, 0)	0 (0, 0)	0 (0, 0)	0 (0, 0)	0 (0, 0)	0 (0, 0)	0 (0, 0)	0 (0, 0)	0 (0, 0)	1 (0, 1)	0 (0, 0)	1 (1, 1)	1 (1, 1)	1 (1, 1)	0 (0, 0)	2 (2, 2)
Baitou	Inner Mongolia	Northeast	Female	35 y～	1 (1, 1)	1 (1, 2)	0 (0, 0)	3 (2, 3)	0 (0, 0)	0 (0, 0)	0 (0, 0)	0 (0, 0)	0 (0, 0)	0 (0, 0)	0 (0, 0)	0 (0, 1)	0 (0, 0)	0 (0, 0)	0 (0, 0)	0 (0, 0)	0 (0, 0)	0 (0, 0)	0 (0, 0)	0 (0, 0)	0 (0, 0)	1 (1, 1)	0 (0, 0)	1 (1, 1)	2 (1, 2)	3 (2, 3)	1 (1, 1)	5 (4, 5)
Baitou	Inner Mongolia	Northeast	Female	40 y～	1 (1, 2)	2 (2, 2)	1 (1, 1)	4 (4, 5)	0 (0, 0)	0 (0, 0)	0 (0, 0)	0 (0, 0)	0 (0, 0)	0 (0, 1)	0 (0, 0)	1 (1, 1)	0 (0, 0)	0 (0, 0)	0 (0, 0)	0 (0, 0)	0 (0, 0)	0 (0, 0)	0 (0, 0)	0 (0, 0)	1 (1, 1)	2 (2, 2)	1 (0, 1)	4 (3, 4)	3 (3, 3)	5 (4, 5)	1 (1, 1)	9 (8, 10)
Baitou	Inner Mongolia	Northeast	Female	45 y～	2 (2, 2)	3 (3, 3)	1 (1, 1)	6 (5, 7)	0 (0, 0)	0 (0, 0)	0 (0, 0)	0 (0, 0)	1 (0, 1)	1 (1, 1)	0 (0, 0)	2 (1, 2)	0 (0, 0)	0 (0, 0)	0 (0, 0)	1 (0, 1)	0 (0, 0)	0 (0, 0)	0 (0, 0)	0 (0, 0)	2 (2, 2)	3 (3, 3)	1 (1, 1)	6 (5, 6)	5 (4, 5)	8 (7, 9)	2 (2, 2)	15 (13, 17)
Baitou	Inner Mongolia	Northeast	Female	50 y～	3 (3, 3)	4 (4, 5)	1 (1, 1)	9 (7, 10)	0 (0, 0)	0 (0, 0)	0 (0, 0)	0 (0, 0)	1 (1, 1)	2 (1, 2)	0 (0, 0)	3 (2, 3)	0 (0, 0)	0 (0, 0)	0 (0, 0)	0 (0, 0)	0 (0, 0)	0 (0, 0)	0 (0, 0)	0 (0, 1)	3 (2, 3)	4 (4, 5)	1 (1, 1)	8 (7, 9)	7 (6, 8)	11 (9, 12)	3 (2, 3)	21 (17, 23)
Baitou	Inner Mongolia	Northeast	Female	55 y～	5 (4, 6)	8 (6, 8)	2 (2, 2)	15 (12, 16)	0 (0, 0)	1 (1, 1)	0 (0, 0)	1 (1, 1)	1 (1, 2)	3 (2, 3)	1 (0, 1)	5 (4, 6)	0 (0, 0)	0 (0, 1)	0 (0, 0)	1 (1, 1)	0 (0, 0)	0 (0, 0)	0 (0, 0)	1 (1, 1)	4 (3, 4)	6 (5, 7)	2 (1, 2)	12 (10, 13)	11 (9, 13)	18 (15, 20)	5 (4, 5)	34 (28, 38)
Baitou	Inner Mongolia	Northeast	Female	60 y～	5 (4, 5)	7 (6, 8)	2 (2, 2)	15 (12, 16)	0 (0, 1)	1 (1, 1)	0 (0, 0)	2 (1, 2)	1 (1, 2)	3 (2, 3)	1 (1, 1)	5 (3, 6)	0 (0, 0)	0 (0, 1)	0 (0, 0)	1 (1, 1)	0 (0, 0)	0 (0, 1)	0 (0, 0)	1 (1, 1)	4 (4, 5)	7 (6, 8)	2 (2, 2)	13 (11, 15)	12 (10, 13)	19 (16, 21)	5 (4, 6)	36 (30, 40)
Baitou	Inner Mongolia	Northeast	Female	65 y～	7 (6, 8)	11 (9, 12)	3 (3, 3)	21 (18, 24)	1 (1, 1)	2 (1, 2)	0 (0, 1)	3 (3, 4)	2 (1, 2)	3 (3, 4)	1 (1, 1)	6 (4, 7)	0 (0, 0)	1 (1, 1)	0 (0, 0)	1 (1, 2)	0 (0, 0)	1 (1, 1)	0 (0, 0)	1 (1, 1)	6 (5, 7)	9 (8, 11)	3 (2, 3)	19 (16, 21)	17 (14, 19)	27 (22, 31)	8 (6, 9)	51 (43, 58)
Baitou	Inner Mongolia	Northeast	Female	70 y～	11 (9, 13)	17 (14, 19)	5 (4, 6)	33 (27, 37)	2 (2, 2)	3 (3, 4)	1 (1, 1)	6 (5, 7)	2 (2, 3)	4 (3, 5)	1 (1, 1)	7 (5, 9)	1 (1, 1)	1 (1, 2)	0 (0, 0)	2 (2, 3)	1 (0, 1)	1 (1, 1)	0 (0, 0)	2 (2, 2)	10 (9, 11)	15 (13, 17)	4 (4, 5)	30 (25, 33)	26 (22, 30)	42 (34, 48)	12 (10, 13)	80 (66, 92)
Baitou	Inner Mongolia	Northeast	Female	75 y～	14 (11, 16)	21 (17, 24)	6 (5, 7)	41 (33, 47)	3 (2, 3)	5 (5, 6)	1 (1, 2)	10 (8, 11)	2 (2, 3)	4 (3, 5)	1 (1, 1)	8 (6, 9)	1 (1, 1)	2 (2, 3)	1 (0, 1)	4 (3, 5)	1 (1, 1)	2 (1, 2)	0 (0, 0)	3 (2, 3)	13 (11, 14)	19 (16, 21)	6 (5, 6)	37 (32, 42)	34 (28, 39)	53 (44, 62)	15 (12, 17)	102 (85, 118)
Baitou	Inner Mongolia	Northeast	Female	80 y～	12 (10, 14)	18 (14, 21)	5 (4, 6)	35 (28, 40)	3 (3, 4)	5 (4, 6)	2 (1, 2)	10 (9, 12)	2 (1, 2)	2 (2, 3)	1 (1, 1)	5 (4, 6)	1 (1, 2)	2 (2, 3)	1 (1, 1)	4 (3, 5)	1 (0, 1)	1 (1, 1)	0 (0, 0)	2 (1, 2)	9 (8, 11)	14 (12, 16)	4 (3, 4)	28 (23, 31)	28 (23, 33)	43 (35, 50)	12 (10, 14)	83 (68, 97)
Baitou	Inner Mongolia	Northeast	Female	85 y～	14 (11, 16)	21 (16, 24)	6 (5, 7)	40 (32, 47)	5 (4, 6)	8 (7, 9)	3 (2, 3)	15 (13, 18)	1 (1, 1)	2 (1, 2)	1 (0, 1)	3 (2, 4)	3 (2, 3)	4 (3, 5)	1 (1, 2)	8 (6, 10)	0 (0, 1)	1 (1, 1)	0 (0, 0)	1 (1, 2)	9 (7, 10)	13 (11, 15)	4 (3, 4)	25 (21, 28)	31 (25, 37)	47 (39, 55)	14 (11, 16)	93 (75, 108)
Chifeng	Inner Mongolia	Northeast	Male	0 y～	0 (0, 0)	0 (0, 0)	0 (0, 0)	0 (0, 0)	0 (0, 0)	0 (0, 0)	0 (0, 0)	0 (0, 0)	0 (0, 0)	0 (0, 0)	0 (0, 0)	0 (0, 0)	0 (0, 0)	0 (0, 0)	0 (0, 0)	0 (0, 0)	0 (0, 0)	0 (0, 0)	0 (0, 0)	0 (0, 0)	0 (0, 0)	0 (0, 0)	0 (0, 0)	0 (0, 0)	0 (0, 0)	0 (0, 0)	0 (0, 0)	0 (0, 0)
Chifeng	Inner Mongolia	Northeast	Male	1 y～	0 (0, 0)	0 (0, 0)	0 (0, 0)	0 (0, 0)	0 (0, 0)	0 (0, 0)	0 (0, 0)	0 (0, 0)	0 (0, 0)	0 (0, 0)	0 (0, 0)	0 (0, 0)	0 (0, 0)	0 (0, 0)	0 (0, 0)	0 (0, 0)	0 (0, 0)	0 (0, 0)	0 (0, 0)	0 (0, 0)	0 (0, 0)	0 (0, 0)	0 (0, 0)	0 (0, 0)	0 (0, 0)	0 (0, 0)	0 (0, 0)	0 (0, 0)
Chifeng	Inner Mongolia	Northeast	Male	5 y～	0 (0, 0)	0 (0, 0)	0 (0, 0)	0 (0, 0)	0 (0, 0)	0 (0, 0)	0 (0, 0)	0 (0, 0)	0 (0, 0)	0 (0, 0)	0 (0, 0)	0 (0, 0)	0 (0, 0)	0 (0, 0)	0 (0, 0)	0 (0, 0)	0 (0, 0)	0 (0, 0)	0 (0, 0)	0 (0, 0)	0 (0, 0)	0 (0, 0)	0 (0, 0)	0 (0, 0)	0 (0, 0)	0 (0, 0)	0 (0, 0)	0 (0, 0)
Chifeng	Inner Mongolia	Northeast	Male	10 y～	0 (0, 0)	0 (0, 0)	0 (0, 0)	0 (0, 0)	0 (0, 0)	0 (0, 0)	0 (0, 0)	0 (0, 0)	0 (0, 0)	0 (0, 0)	0 (0, 0)	0 (0, 0)	0 (0, 0)	0 (0, 0)	0 (0, 0)	0 (0, 0)	0 (0, 0)	0 (0, 0)	0 (0, 0)	0 (0, 0)	0 (0, 0)	0 (0, 0)	0 (0, 0)	0 (0, 0)	0 (0, 0)	0 (0, 0)	0 (0, 0)	0 (0, 0)
Chifeng	Inner Mongolia	Northeast	Male	15 y～	0 (0, 0)	0 (0, 0)	0 (0, 0)	1 (1, 1)	0 (0, 0)	0 (0, 0)	0 (0, 0)	0 (0, 0)	0 (0, 0)	0 (0, 0)	0 (0, 0)	0 (0, 0)	0 (0, 0)	0 (0, 0)	0 (0, 0)	0 (0, 0)	0 (0, 0)	0 (0, 0)	0 (0, 0)	0 (0, 0)	0 (0, 0)	0 (0, 0)	0 (0, 0)	0 (0, 0)	0 (0, 0)	1 (0, 1)	0 (0, 0)	1 (1, 1)
Chifeng	Inner Mongolia	Northeast	Male	20 y～	0 (0, 0)	1 (0, 1)	0 (0, 0)	1 (1, 1)	0 (0, 0)	0 (0, 0)	0 (0, 0)	0 (0, 0)	0 (0, 0)	0 (0, 0)	0 (0, 0)	0 (0, 0)	0 (0, 0)	0 (0, 0)	0 (0, 0)	0 (0, 0)	0 (0, 0)	0 (0, 0)	0 (0, 0)	0 (0, 0)	0 (0, 0)	0 (0, 0)	0 (0, 0)	0 (0, 0)	0 (0, 0)	1 (1, 1)	0 (0, 0)	2 (1, 2)
Chifeng	Inner Mongolia	Northeast	Male	25 y～	0 (0, 0)	1 (1, 1)	0 (0, 0)	1 (1, 1)	0 (0, 0)	0 (0, 0)	0 (0, 0)	0 (0, 0)	0 (0, 0)	0 (0, 0)	0 (0, 0)	0 (0, 0)	0 (0, 0)	0 (0, 0)	0 (0, 0)	0 (0, 0)	0 (0, 0)	0 (0, 0)	0 (0, 0)	0 (0, 0)	0 (0, 0)	0 (0, 0)	0 (0, 0)	1 (1, 1)	1 (0, 1)	1 (1, 1)	1 (0, 1)	2 (2, 3)
Chifeng	Inner Mongolia	Northeast	Male	30 y～	1 (1, 1)	2 (2, 2)	1 (1, 1)	4 (3, 4)	0 (0, 0)	0 (0, 0)	0 (0, 0)	0 (0, 0)	0 (0, 0)	0 (0, 0)	0 (0, 0)	0 (0, 0)	0 (0, 0)	0 (0, 0)	0 (0, 0)	0 (0, 0)	0 (0, 0)	0 (0, 0)	0 (0, 0)	0 (0, 0)	1 (0, 1)	1 (1, 1)	1 (0, 1)	2 (2, 2)	2 (1, 2)	3 (3, 4)	2 (1, 2)	7 (6, 7)
Chifeng	Inner Mongolia	Northeast	Male	35 y～	2 (2, 2)	4 (4, 5)	2 (2, 2)	8 (7, 9)	0 (0, 0)	0 (0, 0)	0 (0, 0)	0 (0, 0)	0 (0, 0)	0 (0, 0)	0 (0, 0)	1 (1, 1)	0 (0, 0)	0 (0, 0)	0 (0, 0)	0 (0, 0)	0 (0, 0)	0 (0, 0)	0 (0, 0)	0 (0, 0)	1 (1, 1)	3 (2, 3)	1 (1, 1)	5 (4, 6)	4 (3, 4)	7 (6, 8)	3 (3, 4)	14 (12, 16)
Chifeng	Inner Mongolia	Northeast	Male	40 y～	4 (3, 4)	8 (7, 9)	4 (3, 4)	16 (13, 18)	0 (0, 0)	0 (0, 0)	0 (0, 0)	0 (0, 0)	0 (0, 0)	1 (0, 1)	0 (0, 0)	1 (1, 2)	0 (0, 0)	0 (0, 0)	0 (0, 0)	1 (0, 1)	0 (0, 0)	0 (0, 0)	0 (0, 0)	0 (0, 0)	2 (2, 3)	5 (5, 6)	2 (2, 3)	10 (9, 12)	7 (6, 8)	15 (12, 17)	7 (6, 8)	29 (24, 33)
Chifeng	Inner Mongolia	Northeast	Male	45 y～	5 (4, 6)	10 (8, 11)	5 (5, 6)	20 (17, 22)	0 (0, 0)	0 (0, 0)	0 (0, 0)	1 (1, 1)	1 (1, 1)	1 (1, 1)	1 (0, 1)	2 (2, 3)	0 (0, 0)	0 (0, 0)	0 (0, 0)	0 (0, 1)	0 (0, 0)	0 (0, 0)	0 (0, 0)	1 (0, 1)	4 (3, 4)	7 (6, 8)	4 (4, 5)	15 (13, 17)	10 (8, 11)	19 (16, 22)	10 (9, 12)	40 (33, 45)
Chifeng	Inner Mongolia	Northeast	Male	50 y～	6 (5, 6)	11 (9, 12)	6 (5, 7)	23 (19, 26)	0 (0, 0)	1 (0, 1)	0 (0, 0)	1 (1, 1)	1 (1, 2)	2 (2, 3)	1 (1, 1)	5 (3, 6)	0 (0, 0)	0 (0, 0)	0 (0, 0)	1 (1, 1)	0 (0, 0)	0 (0, 0)	0 (0, 0)	1 (0, 1)	5 (4, 5)	9 (8, 10)	5 (4, 6)	18 (16, 21)	12 (10, 14)	23 (19, 26)	13 (11, 14)	48 (40, 55)
Chifeng	Inner Mongolia	Northeast	Male	55 y～	9 (8, 10)	18 (15, 20)	10 (8, 11)	37 (31, 41)	1 (1, 1)	1 (1, 2)	1 (1, 1)	3 (2, 3)	3 (2, 4)	5 (4, 6)	3 (2, 3)	10 (8, 13)	0 (0, 0)	1 (0, 1)	0 (0, 0)	1 (1, 1)	0 (0, 0)	1 (0, 1)	0 (0, 0)	1 (1, 2)	7 (6, 8)	14 (12, 16)	8 (7, 9)	30 (26, 34)	21 (17, 24)	40 (33, 45)	22 (18, 25)	82 (68, 94)
Chifeng	Inner Mongolia	Northeast	Male	60 y～	7 (5, 7)	13 (11, 15)	7 (6, 8)	27 (22, 30)	1 (1, 1)	2 (1, 2)	1 (1, 1)	4 (3, 5)	3 (2, 4)	5 (4, 6)	3 (2, 4)	11 (8, 13)	0 (0, 1)	1 (0, 1)	0 (0, 0)	1 (1, 2)	0 (0, 0)	0 (0, 1)	0 (0, 0)	1 (1, 1)	6 (5, 7)	13 (11, 15)	6 (5, 7)	26 (22, 29)	18 (15, 21)	34 (28, 39)	18 (15, 21)	70 (57, 81)
Chifeng	Inner Mongolia	Northeast	Male	65 y～	7 (5, 7)	14 (11, 15)	7 (6, 8)	27 (22, 31)	2 (1, 2)	3 (2, 3)	2 (1, 2)	6 (5, 7)	4 (3, 4)	5 (4, 7)	3 (3, 4)	12 (9, 15)	1 (0, 1)	1 (1, 1)	1 (0, 1)	2 (1, 2)	0 (0, 0)	1 (0, 1)	0 (0, 0)	1 (1, 1)	7 (6, 8)	14 (12, 16)	7 (6, 8)	28 (23, 32)	20 (16, 23)	37 (30, 42)	20 (16, 23)	76 (62, 88)
Chifeng	Inner Mongolia	Northeast	Male	70 y～	9 (7, 10)	18 (14, 21)	9 (7, 11)	36 (29, 42)	4 (3, 4)	5 (4, 6)	3 (3, 4)	12 (10, 15)	4 (3, 5)	7 (5, 8)	4 (3, 5)	15 (11, 19)	1 (1, 1)	1 (1, 2)	1 (1, 1)	3 (2, 4)	1 (0, 1)	1 (1, 1)	0 (0, 1)	2 (1, 2)	10 (8, 11)	20 (17, 22)	10 (8, 11)	39 (33, 44)	28 (23, 33)	52 (42, 60)	28 (23, 32)	107 (87, 125)
Chifeng	Inner Mongolia	Northeast	Male	75 y～	9 (7, 11)	19 (15, 23)	10 (8, 11)	38 (31, 45)	5 (4, 6)	8 (6, 9)	5 (4, 6)	18 (15, 21)	4 (3, 5)	6 (4, 7)	4 (3, 5)	13 (10, 17)	1 (1, 2)	2 (1, 2)	1 (1, 2)	4 (3, 6)	1 (0, 1)	1 (1, 1)	1 (0, 1)	2 (2, 2)	10 (8, 11)	20 (17, 23)	10 (9, 12)	40 (34, 46)	30 (25, 36)	56 (45, 65)	30 (25, 35)	116 (95, 136)
Chifeng	Inner Mongolia	Northeast	Male	80 y～	7 (6, 8)	15 (12, 17)	7 (6, 8)	29 (23, 34)	4 (4, 5)	9 (7, 10)	4 (4, 5)	17 (14, 20)	2 (1, 2)	4 (3, 4)	2 (1, 2)	7 (6, 9)	1 (1, 2)	2 (2, 3)	1 (1, 2)	5 (4, 6)	0 (0, 0)	1 (1, 1)	0 (0, 0)	1 (1, 2)	7 (6, 8)	14 (12, 16)	7 (6, 8)	28 (24, 32)	21 (17, 25)	45 (36, 52)	21 (17, 25)	87 (71, 102)
Chifeng	Inner Mongolia	Northeast	Male	85 y～	6 (5, 8)	14 (11, 16)	6 (5, 8)	27 (21, 31)	4 (4, 5)	9 (7, 10)	4 (4, 5)	18 (15, 20)	1 (1, 1)	2 (2, 3)	1 (1, 1)	4 (3, 5)	2 (1, 2)	4 (3, 5)	2 (1, 2)	8 (6, 10)	0 (0, 0)	1 (0, 1)	0 (0, 0)	1 (1, 1)	5 (4, 5)	10 (8, 11)	5 (4, 5)	19 (16, 22)	19 (15, 22)	39 (32, 46)	19 (15, 22)	77 (62, 90)
Chifeng	Inner Mongolia	Northeast	Female	0 y～	0 (0, 0)	0 (0, 0)	0 (0, 0)	0 (0, 0)	0 (0, 0)	0 (0, 0)	0 (0, 0)	0 (0, 0)	0 (0, 0)	0 (0, 0)	0 (0, 0)	0 (0, 0)	0 (0, 0)	0 (0, 0)	0 (0, 0)	0 (0, 0)	0 (0, 0)	0 (0, 0)	0 (0, 0)	0 (0, 0)	0 (0, 0)	0 (0, 0)	0 (0, 0)	0 (0, 0)	0 (0, 0)	0 (0, 0)	0 (0, 0)	0 (0, 0)
Chifeng	Inner Mongolia	Northeast	Female	1 y～	0 (0, 0)	0 (0, 0)	0 (0, 0)	0 (0, 0)	0 (0, 0)	0 (0, 0)	0 (0, 0)	0 (0, 0)	0 (0, 0)	0 (0, 0)	0 (0, 0)	0 (0, 0)	0 (0, 0)	0 (0, 0)	0 (0, 0)	0 (0, 0)	0 (0, 0)	0 (0, 0)	0 (0, 0)	0 (0, 0)	0 (0, 0)	0 (0, 0)	0 (0, 0)	0 (0, 0)	0 (0, 0)	0 (0, 0)	0 (0, 0)	0 (0, 0)
Chifeng	Inner Mongolia	Northeast	Female	5 y～	0 (0, 0)	0 (0, 0)	0 (0, 0)	0 (0, 0)	0 (0, 0)	0 (0, 0)	0 (0, 0)	0 (0, 0)	0 (0, 0)	0 (0, 0)	0 (0, 0)	0 (0, 0)	0 (0, 0)	0 (0, 0)	0 (0, 0)	0 (0, 0)	0 (0, 0)	0 (0, 0)	0 (0, 0)	0 (0, 0)	0 (0, 0)	0 (0, 0)	0 (0, 0)	0 (0, 0)	0 (0, 0)	0 (0, 0)	0 (0, 0)	0 (0, 0)
Chifeng	Inner Mongolia	Northeast	Female	10 y～	0 (0, 0)	0 (0, 0)	0 (0, 0)	0 (0, 0)	0 (0, 0)	0 (0, 0)	0 (0, 0)	0 (0, 0)	0 (0, 0)	0 (0, 0)	0 (0, 0)	0 (0, 0)	0 (0, 0)	0 (0, 0)	0 (0, 0)	0 (0, 0)	0 (0, 0)	0 (0, 0)	0 (0, 0)	0 (0, 0)	0 (0, 0)	0 (0, 0)	0 (0, 0)	0 (0, 0)	0 (0, 0)	0 (0, 0)	0 (0, 0)	0 (0, 0)
Chifeng	Inner Mongolia	Northeast	Female	15 y～	0 (0, 0)	0 (0, 0)	0 (0, 0)	0 (0, 0)	0 (0, 0)	0 (0, 0)	0 (0, 0)	0 (0, 0)	0 (0, 0)	0 (0, 0)	0 (0, 0)	0 (0, 0)	0 (0, 0)	0 (0, 0)	0 (0, 0)	0 (0, 0)	0 (0, 0)	0 (0, 0)	0 (0, 0)	0 (0, 0)	0 (0, 0)	0 (0, 0)	0 (0, 0)	0 (0, 0)	0 (0, 0)	0 (0, 0)	0 (0, 0)	1 (0, 1)
Chifeng	Inner Mongolia	Northeast	Female	20 y～	0 (0, 0)	0 (0, 0)	0 (0, 0)	0 (0, 0)	0 (0, 0)	0 (0, 0)	0 (0, 0)	0 (0, 0)	0 (0, 0)	0 (0, 0)	0 (0, 0)	0 (0, 0)	0 (0, 0)	0 (0, 0)	0 (0, 0)	0 (0, 0)	0 (0, 0)	0 (0, 0)	0 (0, 0)	0 (0, 0)	0 (0, 0)	0 (0, 0)	0 (0, 0)	0 (0, 0)	0 (0, 0)	0 (0, 0)	0 (0, 0)	0 (0, 1)
Chifeng	Inner Mongolia	Northeast	Female	25 y～	0 (0, 0)	0 (0, 0)	0 (0, 0)	0 (0, 0)	0 (0, 0)	0 (0, 0)	0 (0, 0)	0 (0, 0)	0 (0, 0)	0 (0, 0)	0 (0, 0)	0 (0, 0)	0 (0, 0)	0 (0, 0)	0 (0, 0)	0 (0, 0)	0 (0, 0)	0 (0, 0)	0 (0, 0)	0 (0, 0)	0 (0, 0)	0 (0, 0)	0 (0, 0)	0 (0, 0)	0 (0, 0)	1 (0, 1)	0 (0, 0)	1 (1, 1)
Chifeng	Inner Mongolia	Northeast	Female	30 y～	0 (0, 0)	0 (0, 1)	0 (0, 0)	1 (1, 1)	0 (0, 0)	0 (0, 0)	0 (0, 0)	0 (0, 0)	0 (0, 0)	0 (0, 0)	0 (0, 0)	0 (0, 0)	0 (0, 0)	0 (0, 0)	0 (0, 0)	0 (0, 0)	0 (0, 0)	0 (0, 0)	0 (0, 0)	0 (0, 0)	0 (0, 0)	0 (0, 1)	0 (0, 0)	1 (1, 1)	0 (0, 0)	1 (1, 1)	0 (0, 0)	2 (1, 2)
Chifeng	Inner Mongolia	Northeast	Female	35 y～	0 (0, 1)	1 (1, 1)	0 (0, 0)	2 (2, 2)	0 (0, 0)	0 (0, 0)	0 (0, 0)	0 (0, 0)	0 (0, 0)	0 (0, 0)	0 (0, 0)	0 (0, 0)	0 (0, 0)	0 (0, 0)	0 (0, 0)	0 (0, 0)	0 (0, 0)	0 (0, 0)	0 (0, 0)	0 (0, 0)	0 (0, 0)	1 (0, 1)	0 (0, 0)	1 (1, 1)	1 (1, 1)	2 (2, 3)	1 (0, 1)	4 (3, 4)
Chifeng	Inner Mongolia	Northeast	Female	40 y～	1 (1, 1)	2 (2, 2)	0 (0, 1)	3 (3, 4)	0 (0, 0)	0 (0, 0)	0 (0, 0)	0 (0, 0)	0 (0, 0)	0 (0, 1)	0 (0, 0)	1 (0, 1)	0 (0, 0)	0 (0, 0)	0 (0, 0)	0 (0, 0)	0 (0, 0)	0 (0, 0)	0 (0, 0)	0 (0, 0)	1 (1, 1)	2 (1, 2)	0 (0, 0)	3 (2, 3)	1 (1, 2)	4 (4, 5)	1 (1, 1)	7 (6, 8)
Chifeng	Inner Mongolia	Northeast	Female	45 y～	1 (1, 1)	3 (2, 3)	1 (1, 1)	5 (4, 5)	0 (0, 0)	0 (0, 0)	0 (0, 0)	0 (0, 0)	0 (0, 0)	1 (1, 1)	0 (0, 0)	1 (1, 2)	0 (0, 0)	0 (0, 0)	0 (0, 0)	0 (0, 1)	0 (0, 0)	0 (0, 0)	0 (0, 0)	0 (0, 0)	1 (1, 1)	3 (2, 3)	1 (1, 1)	4 (4, 5)	2 (2, 3)	7 (6, 8)	2 (1, 2)	11 (9, 13)
Chifeng	Inner Mongolia	Northeast	Female	50 y～	1 (1, 2)	4 (3, 5)	1 (1, 1)	7 (6, 7)	0 (0, 0)	0 (0, 0)	0 (0, 0)	0 (0, 0)	0 (0, 0)	1 (1, 2)	0 (0, 0)	2 (1, 2)	0 (0, 0)	0 (0, 0)	0 (0, 0)	0 (0, 0)	0 (0, 0)	0 (0, 0)	0 (0, 0)	0 (0, 0)	1 (1, 2)	4 (3, 4)	1 (1, 1)	6 (5, 7)	3 (3, 4)	10 (8, 11)	2 (2, 3)	16 (13, 18)
Chifeng	Inner Mongolia	Northeast	Female	55 y～	2 (2, 3)	7 (6, 8)	2 (1, 2)	11 (9, 12)	0 (0, 0)	1 (1, 1)	0 (0, 0)	1 (1, 1)	1 (1, 1)	2 (2, 3)	1 (0, 1)	4 (3, 5)	0 (0, 0)	0 (0, 1)	0 (0, 0)	1 (0, 1)	0 (0, 0)	0 (0, 0)	0 (0, 0)	1 (0, 1)	2 (2, 2)	5 (5, 6)	1 (1, 2)	9 (7, 10)	5 (5, 6)	16 (14, 19)	4 (3, 4)	26 (21, 29)
Chifeng	Inner Mongolia	Northeast	Female	60 y～	2 (2, 3)	7 (6, 8)	2 (1, 2)	11 (9, 12)	0 (0, 0)	1 (1, 1)	0 (0, 0)	1 (1, 1)	1 (0, 1)	2 (2, 3)	1 (0, 1)	3 (3, 4)	0 (0, 0)	0 (0, 0)	0 (0, 0)	1 (0, 1)	0 (0, 0)	0 (0, 1)	0 (0, 0)	1 (1, 1)	2 (2, 2)	6 (5, 7)	2 (1, 2)	10 (8, 11)	6 (5, 7)	17 (14, 19)	4 (3, 5)	27 (22, 31)
Chifeng	Inner Mongolia	Northeast	Female	65 y～	3 (3, 4)	10 (8, 11)	3 (2, 3)	16 (13, 18)	0 (0, 1)	2 (1, 2)	0 (0, 0)	2 (2, 3)	1 (1, 1)	3 (2, 4)	1 (0, 1)	4 (3, 5)	0 (0, 0)	1 (0, 1)	0 (0, 0)	1 (1, 1)	0 (0, 0)	1 (1, 1)	0 (0, 0)	1 (1, 1)	3 (3, 3)	9 (7, 10)	2 (2, 3)	14 (12, 16)	8 (7, 9)	24 (20, 28)	6 (5, 7)	38 (32, 44)
Chifeng	Inner Mongolia	Northeast	Female	70 y～	5 (4, 6)	15 (12, 18)	4 (3, 5)	25 (20, 28)	1 (1, 1)	3 (3, 3)	1 (1, 1)	5 (4, 5)	1 (1, 1)	4 (3, 4)	1 (1, 1)	5 (4, 7)	0 (0, 0)	1 (1, 1)	0 (0, 0)	2 (1, 2)	0 (0, 0)	1 (1, 1)	0 (0, 0)	2 (1, 2)	5 (4, 5)	14 (12, 15)	4 (3, 4)	22 (19, 25)	13 (11, 15)	38 (31, 44)	9 (8, 11)	60 (49, 69)
Chifeng	Inner Mongolia	Northeast	Female	75 y～	7 (6, 8)	19 (16, 22)	5 (4, 6)	31 (25, 36)	1 (1, 2)	5 (4, 6)	1 (1, 1)	7 (6, 8)	1 (1, 1)	4 (3, 5)	1 (1, 1)	6 (4, 7)	1 (0, 1)	2 (1, 2)	0 (0, 1)	3 (2, 4)	0 (0, 0)	1 (1, 2)	0 (0, 0)	2 (2, 2)	6 (5, 7)	17 (15, 20)	4 (4, 5)	28 (24, 31)	16 (13, 19)	48 (40, 56)	12 (10, 14)	76 (63, 89)
Chifeng	Inner Mongolia	Northeast	Female	80 y～	6 (4, 6)	16 (12, 18)	4 (3, 5)	25 (20, 30)	2 (1, 2)	5 (4, 5)	1 (1, 2)	8 (6, 9)	1 (1, 1)	2 (2, 3)	1 (0, 1)	3 (3, 4)	1 (0, 1)	2 (1, 2)	1 (0, 1)	3 (2, 4)	0 (0, 0)	1 (1, 1)	0 (0, 0)	1 (1, 2)	4 (4, 5)	12 (10, 14)	3 (3, 4)	20 (17, 23)	13 (11, 15)	37 (30, 44)	10 (8, 11)	60 (49, 71)
Chifeng	Inner Mongolia	Northeast	Female	85 y～	6 (5, 7)	18 (14, 21)	4 (4, 5)	29 (23, 34)	2 (2, 3)	7 (6, 8)	2 (2, 2)	11 (9, 13)	0 (0, 1)	1 (1, 2)	0 (0, 0)	2 (2, 3)	1 (1, 2)	3 (3, 4)	1 (1, 1)	6 (4, 7)	0 (0, 0)	1 (1, 1)	0 (0, 0)	1 (1, 1)	4 (3, 4)	11 (9, 13)	3 (2, 3)	18 (15, 20)	14 (12, 17)	41 (33, 49)	11 (9, 13)	67 (54, 79)
Ordos	Inner Mongolia	Northeast	Male	0 y～	0 (0, 0)	0 (0, 0)	0 (0, 0)	0 (0, 0)	0 (0, 0)	0 (0, 0)	0 (0, 0)	0 (0, 0)	0 (0, 0)	0 (0, 0)	0 (0, 0)	0 (0, 0)	0 (0, 0)	0 (0, 0)	0 (0, 0)	0 (0, 0)	0 (0, 0)	0 (0, 0)	0 (0, 0)	0 (0, 0)	0 (0, 0)	0 (0, 0)	0 (0, 0)	0 (0, 0)	0 (0, 0)	0 (0, 0)	0 (0, 0)	0 (0, 0)
Ordos	Inner Mongolia	Northeast	Male	1 y～	0 (0, 0)	0 (0, 0)	0 (0, 0)	0 (0, 0)	0 (0, 0)	0 (0, 0)	0 (0, 0)	0 (0, 0)	0 (0, 0)	0 (0, 0)	0 (0, 0)	0 (0, 0)	0 (0, 0)	0 (0, 0)	0 (0, 0)	0 (0, 0)	0 (0, 0)	0 (0, 0)	0 (0, 0)	0 (0, 0)	0 (0, 0)	0 (0, 0)	0 (0, 0)	0 (0, 0)	0 (0, 0)	0 (0, 0)	0 (0, 0)	0 (0, 0)
Ordos	Inner Mongolia	Northeast	Male	5 y～	0 (0, 0)	0 (0, 0)	0 (0, 0)	0 (0, 0)	0 (0, 0)	0 (0, 0)	0 (0, 0)	0 (0, 0)	0 (0, 0)	0 (0, 0)	0 (0, 0)	0 (0, 0)	0 (0, 0)	0 (0, 0)	0 (0, 0)	0 (0, 0)	0 (0, 0)	0 (0, 0)	0 (0, 0)	0 (0, 0)	0 (0, 0)	0 (0, 0)	0 (0, 0)	0 (0, 0)	0 (0, 0)	0 (0, 0)	0 (0, 0)	0 (0, 0)
Ordos	Inner Mongolia	Northeast	Male	10 y～	0 (0, 0)	0 (0, 0)	0 (0, 0)	0 (0, 0)	0 (0, 0)	0 (0, 0)	0 (0, 0)	0 (0, 0)	0 (0, 0)	0 (0, 0)	0 (0, 0)	0 (0, 0)	0 (0, 0)	0 (0, 0)	0 (0, 0)	0 (0, 0)	0 (0, 0)	0 (0, 0)	0 (0, 0)	0 (0, 0)	0 (0, 0)	0 (0, 0)	0 (0, 0)	0 (0, 0)	0 (0, 0)	0 (0, 0)	0 (0, 0)	0 (0, 0)
Ordos	Inner Mongolia	Northeast	Male	15 y～	0 (0, 0)	0 (0, 0)	0 (0, 0)	0 (0, 0)	0 (0, 0)	0 (0, 0)	0 (0, 0)	0 (0, 0)	0 (0, 0)	0 (0, 0)	0 (0, 0)	0 (0, 0)	0 (0, 0)	0 (0, 0)	0 (0, 0)	0 (0, 0)	0 (0, 0)	0 (0, 0)	0 (0, 0)	0 (0, 0)	0 (0, 0)	0 (0, 0)	0 (0, 0)	0 (0, 0)	0 (0, 0)	0 (0, 0)	0 (0, 0)	0 (0, 0)
Ordos	Inner Mongolia	Northeast	Male	20 y～	0 (0, 0)	0 (0, 0)	0 (0, 0)	0 (0, 0)	0 (0, 0)	0 (0, 0)	0 (0, 0)	0 (0, 0)	0 (0, 0)	0 (0, 0)	0 (0, 0)	0 (0, 0)	0 (0, 0)	0 (0, 0)	0 (0, 0)	0 (0, 0)	0 (0, 0)	0 (0, 0)	0 (0, 0)	0 (0, 0)	0 (0, 0)	0 (0, 0)	0 (0, 0)	0 (0, 0)	0 (0, 0)	0 (0, 0)	0 (0, 0)	0 (0, 0)
Ordos	Inner Mongolia	Northeast	Male	25 y～	0 (0, 0)	0 (0, 0)	0 (0, 0)	0 (0, 0)	0 (0, 0)	0 (0, 0)	0 (0, 0)	0 (0, 0)	0 (0, 0)	0 (0, 0)	0 (0, 0)	0 (0, 0)	0 (0, 0)	0 (0, 0)	0 (0, 0)	0 (0, 0)	0 (0, 0)	0 (0, 0)	0 (0, 0)	0 (0, 0)	0 (0, 0)	0 (0, 0)	0 (0, 0)	0 (0, 0)	0 (0, 0)	0 (0, 0)	0 (0, 0)	1 (1, 1)
Ordos	Inner Mongolia	Northeast	Male	30 y～	0 (0, 0)	0 (0, 1)	0 (0, 0)	1 (1, 1)	0 (0, 0)	0 (0, 0)	0 (0, 0)	0 (0, 0)	0 (0, 0)	0 (0, 0)	0 (0, 0)	0 (0, 0)	0 (0, 0)	0 (0, 0)	0 (0, 0)	0 (0, 0)	0 (0, 0)	0 (0, 0)	0 (0, 0)	0 (0, 0)	0 (0, 0)	0 (0, 0)	0 (0, 0)	1 (1, 1)	0 (0, 1)	1 (1, 1)	0 (0, 0)	2 (1, 2)
Ordos	Inner Mongolia	Northeast	Male	35 y～	1 (0, 1)	1 (1, 1)	1 (0, 1)	2 (2, 2)	0 (0, 0)	0 (0, 0)	0 (0, 0)	0 (0, 0)	0 (0, 0)	0 (0, 0)	0 (0, 0)	0 (0, 0)	0 (0, 0)	0 (0, 0)	0 (0, 0)	0 (0, 0)	0 (0, 0)	0 (0, 0)	0 (0, 0)	0 (0, 0)	0 (0, 0)	1 (0, 1)	0 (0, 0)	1 (1, 1)	1 (1, 1)	2 (1, 2)	1 (1, 1)	4 (3, 4)
Ordos	Inner Mongolia	Northeast	Male	40 y～	1 (1, 1)	2 (2, 2)	1 (1, 1)	4 (3, 4)	0 (0, 0)	0 (0, 0)	0 (0, 0)	0 (0, 0)	0 (0, 0)	0 (0, 0)	0 (0, 0)	0 (0, 0)	0 (0, 0)	0 (0, 0)	0 (0, 0)	0 (0, 0)	0 (0, 0)	0 (0, 0)	0 (0, 0)	0 (0, 0)	1 (1, 1)	1 (1, 1)	1 (1, 1)	3 (2, 3)	2 (2, 2)	3 (3, 4)	2 (2, 2)	7 (6, 8)
Ordos	Inner Mongolia	Northeast	Male	45 y～	1 (1, 2)	2 (2, 2)	1 (1, 2)	5 (4, 6)	0 (0, 0)	0 (0, 0)	0 (0, 0)	0 (0, 0)	0 (0, 0)	0 (0, 0)	0 (0, 0)	1 (0, 1)	0 (0, 0)	0 (0, 0)	0 (0, 0)	0 (0, 0)	0 (0, 0)	0 (0, 0)	0 (0, 0)	0 (0, 0)	1 (1, 1)	2 (1, 2)	1 (1, 1)	4 (3, 4)	3 (2, 3)	4 (4, 5)	3 (2, 3)	10 (8, 11)
Ordos	Inner Mongolia	Northeast	Male	50 y～	2 (1, 2)	2 (2, 3)	2 (1, 2)	6 (5, 6)	0 (0, 0)	0 (0, 0)	0 (0, 0)	0 (0, 0)	0 (0, 0)	0 (0, 1)	0 (0, 0)	1 (1, 1)	0 (0, 0)	0 (0, 0)	0 (0, 0)	0 (0, 0)	0 (0, 0)	0 (0, 0)	0 (0, 0)	0 (0, 0)	1 (1, 1)	2 (2, 2)	1 (1, 1)	5 (4, 5)	3 (3, 4)	5 (4, 6)	3 (3, 4)	12 (10, 14)
Ordos	Inner Mongolia	Northeast	Male	55 y～	3 (2, 3)	4 (3, 4)	3 (2, 3)	9 (8, 10)	0 (0, 0)	0 (0, 0)	0 (0, 0)	1 (1, 1)	1 (1, 1)	1 (1, 1)	1 (1, 1)	3 (2, 3)	0 (0, 0)	0 (0, 0)	0 (0, 0)	0 (0, 0)	0 (0, 0)	0 (0, 0)	0 (0, 0)	0 (0, 0)	2 (2, 2)	3 (3, 4)	2 (2, 2)	7 (6, 8)	6 (5, 7)	9 (7, 10)	6 (5, 7)	20 (17, 23)
Ordos	Inner Mongolia	Northeast	Male	60 y～	2 (1, 2)	3 (2, 3)	2 (1, 2)	7 (5, 7)	0 (0, 0)	0 (0, 0)	0 (0, 0)	1 (1, 1)	1 (1, 1)	1 (1, 1)	1 (1, 1)	3 (2, 3)	0 (0, 0)	0 (0, 0)	0 (0, 0)	0 (0, 0)	0 (0, 0)	0 (0, 0)	0 (0, 0)	0 (0, 0)	2 (1, 2)	3 (2, 3)	2 (1, 2)	6 (5, 7)	5 (4, 6)	8 (6, 9)	5 (4, 5)	17 (14, 20)
Ordos	Inner Mongolia	Northeast	Male	65 y～	2 (1, 2)	3 (3, 3)	2 (2, 2)	7 (6, 8)	0 (0, 1)	1 (0, 1)	0 (0, 0)	1 (1, 2)	1 (1, 1)	1 (1, 1)	1 (1, 1)	3 (2, 4)	0 (0, 0)	0 (0, 0)	0 (0, 0)	0 (0, 1)	0 (0, 0)	0 (0, 0)	0 (0, 0)	0 (0, 0)	2 (2, 2)	3 (3, 4)	2 (2, 2)	7 (6, 8)	5 (4, 6)	8 (7, 10)	5 (4, 6)	19 (15, 22)
Ordos	Inner Mongolia	Northeast	Male	70 y～	2 (2, 3)	4 (3, 5)	2 (2, 3)	9 (7, 10)	1 (1, 1)	1 (1, 1)	1 (1, 1)	3 (3, 4)	1 (1, 1)	2 (1, 2)	1 (1, 1)	4 (3, 5)	0 (0, 0)	0 (0, 0)	0 (0, 0)	1 (1, 1)	0 (0, 0)	0 (0, 0)	0 (0, 0)	0 (0, 0)	3 (2, 3)	4 (4, 5)	3 (2, 3)	10 (8, 11)	8 (6, 9)	12 (9, 14)	7 (6, 8)	26 (22, 31)
Ordos	Inner Mongolia	Northeast	Male	75 y～	3 (2, 3)	4 (3, 5)	3 (2, 3)	9 (8, 11)	1 (1, 2)	2 (1, 2)	1 (1, 1)	4 (4, 5)	1 (1, 1)	1 (1, 2)	1 (1, 1)	3 (3, 4)	0 (0, 0)	0 (0, 1)	0 (0, 0)	1 (1, 1)	0 (0, 0)	0 (0, 0)	0 (0, 0)	0 (0, 1)	3 (2, 3)	5 (4, 5)	3 (2, 3)	10 (8, 11)	8 (7, 10)	13 (10, 15)	8 (6, 9)	29 (23, 34)
Ordos	Inner Mongolia	Northeast	Male	80 y～	2 (2, 2)	3 (3, 4)	2 (2, 2)	7 (6, 8)	1 (1, 1)	2 (2, 2)	1 (1, 1)	4 (4, 5)	0 (0, 1)	1 (1, 1)	0 (0, 1)	2 (1, 2)	0 (0, 0)	1 (0, 1)	0 (0, 0)	1 (1, 2)	0 (0, 0)	0 (0, 0)	0 (0, 0)	0 (0, 0)	2 (2, 2)	3 (3, 4)	2 (2, 2)	7 (6, 8)	6 (5, 7)	10 (8, 12)	6 (5, 7)	22 (18, 25)
Ordos	Inner Mongolia	Northeast	Male	85 y～	2 (1, 2)	3 (2, 4)	2 (1, 2)	7 (5, 8)	1 (1, 1)	2 (2, 2)	1 (1, 1)	4 (4, 5)	0 (0, 0)	1 (0, 1)	0 (0, 0)	1 (1, 1)	1 (0, 1)	1 (1, 1)	1 (0, 1)	2 (1, 2)	0 (0, 0)	0 (0, 0)	0 (0, 0)	0 (0, 0)	1 (1, 1)	2 (2, 3)	1 (1, 1)	5 (4, 5)	5 (4, 6)	9 (7, 10)	5 (4, 6)	19 (15, 22)
Ordos	Inner Mongolia	Northeast	Female	0 y～	0 (0, 0)	0 (0, 0)	0 (0, 0)	0 (0, 0)	0 (0, 0)	0 (0, 0)	0 (0, 0)	0 (0, 0)	0 (0, 0)	0 (0, 0)	0 (0, 0)	0 (0, 0)	0 (0, 0)	0 (0, 0)	0 (0, 0)	0 (0, 0)	0 (0, 0)	0 (0, 0)	0 (0, 0)	0 (0, 0)	0 (0, 0)	0 (0, 0)	0 (0, 0)	0 (0, 0)	0 (0, 0)	0 (0, 0)	0 (0, 0)	0 (0, 0)
Ordos	Inner Mongolia	Northeast	Female	1 y～	0 (0, 0)	0 (0, 0)	0 (0, 0)	0 (0, 0)	0 (0, 0)	0 (0, 0)	0 (0, 0)	0 (0, 0)	0 (0, 0)	0 (0, 0)	0 (0, 0)	0 (0, 0)	0 (0, 0)	0 (0, 0)	0 (0, 0)	0 (0, 0)	0 (0, 0)	0 (0, 0)	0 (0, 0)	0 (0, 0)	0 (0, 0)	0 (0, 0)	0 (0, 0)	0 (0, 0)	0 (0, 0)	0 (0, 0)	0 (0, 0)	0 (0, 0)
Ordos	Inner Mongolia	Northeast	Female	5 y～	0 (0, 0)	0 (0, 0)	0 (0, 0)	0 (0, 0)	0 (0, 0)	0 (0, 0)	0 (0, 0)	0 (0, 0)	0 (0, 0)	0 (0, 0)	0 (0, 0)	0 (0, 0)	0 (0, 0)	0 (0, 0)	0 (0, 0)	0 (0, 0)	0 (0, 0)	0 (0, 0)	0 (0, 0)	0 (0, 0)	0 (0, 0)	0 (0, 0)	0 (0, 0)	0 (0, 0)	0 (0, 0)	0 (0, 0)	0 (0, 0)	0 (0, 0)
Ordos	Inner Mongolia	Northeast	Female	10 y～	0 (0, 0)	0 (0, 0)	0 (0, 0)	0 (0, 0)	0 (0, 0)	0 (0, 0)	0 (0, 0)	0 (0, 0)	0 (0, 0)	0 (0, 0)	0 (0, 0)	0 (0, 0)	0 (0, 0)	0 (0, 0)	0 (0, 0)	0 (0, 0)	0 (0, 0)	0 (0, 0)	0 (0, 0)	0 (0, 0)	0 (0, 0)	0 (0, 0)	0 (0, 0)	0 (0, 0)	0 (0, 0)	0 (0, 0)	0 (0, 0)	0 (0, 0)
Ordos	Inner Mongolia	Northeast	Female	15 y～	0 (0, 0)	0 (0, 0)	0 (0, 0)	0 (0, 0)	0 (0, 0)	0 (0, 0)	0 (0, 0)	0 (0, 0)	0 (0, 0)	0 (0, 0)	0 (0, 0)	0 (0, 0)	0 (0, 0)	0 (0, 0)	0 (0, 0)	0 (0, 0)	0 (0, 0)	0 (0, 0)	0 (0, 0)	0 (0, 0)	0 (0, 0)	0 (0, 0)	0 (0, 0)	0 (0, 0)	0 (0, 0)	0 (0, 0)	0 (0, 0)	0 (0, 0)
Ordos	Inner Mongolia	Northeast	Female	20 y～	0 (0, 0)	0 (0, 0)	0 (0, 0)	0 (0, 0)	0 (0, 0)	0 (0, 0)	0 (0, 0)	0 (0, 0)	0 (0, 0)	0 (0, 0)	0 (0, 0)	0 (0, 0)	0 (0, 0)	0 (0, 0)	0 (0, 0)	0 (0, 0)	0 (0, 0)	0 (0, 0)	0 (0, 0)	0 (0, 0)	0 (0, 0)	0 (0, 0)	0 (0, 0)	0 (0, 0)	0 (0, 0)	0 (0, 0)	0 (0, 0)	0 (0, 0)
Ordos	Inner Mongolia	Northeast	Female	25 y～	0 (0, 0)	0 (0, 0)	0 (0, 0)	0 (0, 0)	0 (0, 0)	0 (0, 0)	0 (0, 0)	0 (0, 0)	0 (0, 0)	0 (0, 0)	0 (0, 0)	0 (0, 0)	0 (0, 0)	0 (0, 0)	0 (0, 0)	0 (0, 0)	0 (0, 0)	0 (0, 0)	0 (0, 0)	0 (0, 0)	0 (0, 0)	0 (0, 0)	0 (0, 0)	0 (0, 0)	0 (0, 0)	0 (0, 0)	0 (0, 0)	0 (0, 0)
Ordos	Inner Mongolia	Northeast	Female	30 y～	0 (0, 0)	0 (0, 0)	0 (0, 0)	0 (0, 0)	0 (0, 0)	0 (0, 0)	0 (0, 0)	0 (0, 0)	0 (0, 0)	0 (0, 0)	0 (0, 0)	0 (0, 0)	0 (0, 0)	0 (0, 0)	0 (0, 0)	0 (0, 0)	0 (0, 0)	0 (0, 0)	0 (0, 0)	0 (0, 0)	0 (0, 0)	0 (0, 0)	0 (0, 0)	0 (0, 0)	0 (0, 0)	0 (0, 0)	0 (0, 0)	0 (0, 0)
Ordos	Inner Mongolia	Northeast	Female	35 y～	0 (0, 0)	0 (0, 0)	0 (0, 0)	1 (0, 1)	0 (0, 0)	0 (0, 0)	0 (0, 0)	0 (0, 0)	0 (0, 0)	0 (0, 0)	0 (0, 0)	0 (0, 0)	0 (0, 0)	0 (0, 0)	0 (0, 0)	0 (0, 0)	0 (0, 0)	0 (0, 0)	0 (0, 0)	0 (0, 0)	0 (0, 0)	0 (0, 0)	0 (0, 0)	0 (0, 0)	0 (0, 0)	1 (0, 1)	0 (0, 0)	1 (1, 1)
Ordos	Inner Mongolia	Northeast	Female	40 y～	0 (0, 0)	0 (0, 1)	0 (0, 0)	1 (1, 1)	0 (0, 0)	0 (0, 0)	0 (0, 0)	0 (0, 0)	0 (0, 0)	0 (0, 0)	0 (0, 0)	0 (0, 0)	0 (0, 0)	0 (0, 0)	0 (0, 0)	0 (0, 0)	0 (0, 0)	0 (0, 0)	0 (0, 0)	0 (0, 0)	0 (0, 0)	0 (0, 0)	0 (0, 0)	1 (1, 1)	0 (0, 0)	1 (1, 1)	0 (0, 0)	2 (1, 2)
Ordos	Inner Mongolia	Northeast	Female	45 y～	0 (0, 0)	1 (1, 1)	0 (0, 0)	1 (1, 1)	0 (0, 0)	0 (0, 0)	0 (0, 0)	0 (0, 0)	0 (0, 0)	0 (0, 0)	0 (0, 0)	0 (0, 0)	0 (0, 0)	0 (0, 0)	0 (0, 0)	0 (0, 0)	0 (0, 0)	0 (0, 0)	0 (0, 0)	0 (0, 0)	0 (0, 0)	1 (1, 1)	0 (0, 0)	1 (1, 1)	1 (1, 1)	2 (1, 2)	0 (0, 1)	3 (2, 3)
Ordos	Inner Mongolia	Northeast	Female	50 y～	0 (0, 0)	1 (1, 1)	0 (0, 0)	2 (1, 2)	0 (0, 0)	0 (0, 0)	0 (0, 0)	0 (0, 0)	0 (0, 0)	0 (0, 0)	0 (0, 0)	0 (0, 1)	0 (0, 0)	0 (0, 0)	0 (0, 0)	0 (0, 0)	0 (0, 0)	0 (0, 0)	0 (0, 0)	0 (0, 0)	0 (0, 0)	1 (1, 1)	0 (0, 0)	2 (1, 2)	1 (1, 1)	2 (2, 3)	1 (1, 1)	4 (3, 4)
Ordos	Inner Mongolia	Northeast	Female	55 y～	1 (1, 1)	2 (1, 2)	0 (0, 1)	3 (2, 3)	0 (0, 0)	0 (0, 0)	0 (0, 0)	0 (0, 0)	0 (0, 0)	1 (0, 1)	0 (0, 0)	1 (1, 1)	0 (0, 0)	0 (0, 0)	0 (0, 0)	0 (0, 0)	0 (0, 0)	0 (0, 0)	0 (0, 0)	0 (0, 0)	1 (0, 1)	1 (1, 1)	0 (0, 0)	2 (2, 2)	1 (1, 2)	4 (3, 4)	1 (1, 1)	6 (5, 7)
Ordos	Inner Mongolia	Northeast	Female	60 y～	1 (1, 1)	2 (1, 2)	0 (0, 1)	3 (2, 3)	0 (0, 0)	0 (0, 0)	0 (0, 0)	0 (0, 0)	0 (0, 0)	1 (0, 1)	0 (0, 0)	1 (1, 1)	0 (0, 0)	0 (0, 0)	0 (0, 0)	0 (0, 0)	0 (0, 0)	0 (0, 0)	0 (0, 0)	0 (0, 0)	1 (1, 1)	1 (1, 2)	0 (0, 0)	2 (2, 3)	2 (1, 2)	4 (3, 4)	1 (1, 1)	7 (5, 8)
Ordos	Inner Mongolia	Northeast	Female	65 y～	1 (1, 1)	2 (2, 3)	1 (1, 1)	4 (3, 4)	0 (0, 0)	0 (0, 0)	0 (0, 0)	1 (0, 1)	0 (0, 0)	1 (1, 1)	0 (0, 0)	1 (1, 1)	0 (0, 0)	0 (0, 0)	0 (0, 0)	0 (0, 0)	0 (0, 0)	0 (0, 0)	0 (0, 0)	0 (0, 0)	1 (1, 1)	2 (2, 2)	1 (1, 1)	3 (3, 4)	2 (2, 3)	6 (5, 6)	2 (1, 2)	9 (8, 11)
Ordos	Inner Mongolia	Northeast	Female	70 y～	1 (1, 2)	3 (3, 4)	1 (1, 1)	6 (5, 7)	0 (0, 0)	1 (1, 1)	0 (0, 0)	1 (1, 1)	0 (0, 0)	1 (1, 1)	0 (0, 0)	1 (1, 2)	0 (0, 0)	0 (0, 0)	0 (0, 0)	0 (0, 1)	0 (0, 0)	0 (0, 0)	0 (0, 0)	0 (0, 0)	1 (1, 1)	3 (3, 4)	1 (1, 1)	5 (5, 6)	3 (3, 4)	9 (7, 10)	3 (2, 3)	15 (12, 17)
Ordos	Inner Mongolia	Northeast	Female	75 y～	2 (1, 2)	4 (4, 5)	1 (1, 2)	7 (6, 9)	0 (0, 0)	1 (1, 1)	0 (0, 0)	2 (2, 2)	0 (0, 0)	1 (1, 1)	0 (0, 0)	1 (1, 2)	0 (0, 0)	0 (0, 1)	0 (0, 0)	1 (1, 1)	0 (0, 0)	0 (0, 0)	0 (0, 0)	1 (0, 1)	2 (1, 2)	4 (3, 4)	1 (1, 1)	7 (6, 8)	4 (4, 5)	11 (9, 13)	3 (3, 4)	19 (15, 22)
Ordos	Inner Mongolia	Northeast	Female	80 y～	1 (1, 2)	4 (3, 4)	1 (1, 1)	6 (5, 7)	0 (0, 1)	1 (1, 1)	0 (0, 0)	2 (2, 2)	0 (0, 0)	0 (0, 1)	0 (0, 0)	1 (1, 1)	0 (0, 0)	0 (0, 1)	0 (0, 0)	1 (1, 1)	0 (0, 0)	0 (0, 0)	0 (0, 0)	0 (0, 0)	1 (1, 1)	3 (2, 3)	1 (1, 1)	5 (4, 6)	4 (3, 4)	9 (7, 10)	3 (2, 3)	15 (12, 17)
Ordos	Inner Mongolia	Northeast	Female	85 y～	2 (1, 2)	4 (3, 5)	1 (1, 1)	7 (6, 8)	1 (1, 1)	2 (1, 2)	1 (0, 1)	3 (2, 3)	0 (0, 0)	0 (0, 0)	0 (0, 0)	1 (0, 1)	0 (0, 0)	1 (1, 1)	0 (0, 0)	1 (1, 2)	0 (0, 0)	0 (0, 0)	0 (0, 0)	0 (0, 0)	1 (1, 1)	3 (2, 3)	1 (1, 1)	4 (4, 5)	4 (3, 5)	10 (8, 11)	3 (2, 3)	16 (13, 19)
Hohhot	Inner Mongolia	Northeast	Male	0 y～	0 (0, 0)	0 (0, 0)	0 (0, 0)	0 (0, 0)	0 (0, 0)	0 (0, 0)	0 (0, 0)	0 (0, 0)	0 (0, 0)	0 (0, 0)	0 (0, 0)	0 (0, 0)	0 (0, 0)	0 (0, 0)	0 (0, 0)	0 (0, 1)	0 (0, 0)	0 (0, 0)	0 (0, 0)	0 (0, 0)	0 (0, 0)	0 (0, 0)	0 (0, 0)	0 (0, 0)	0 (0, 0)	0 (0, 0)	0 (0, 0)	0 (0, 1)
Hohhot	Inner Mongolia	Northeast	Male	1 y～	0 (0, 0)	0 (0, 0)	0 (0, 0)	0 (0, 0)	0 (0, 0)	0 (0, 0)	0 (0, 0)	0 (0, 0)	0 (0, 0)	0 (0, 0)	0 (0, 0)	0 (0, 0)	0 (0, 0)	0 (0, 0)	0 (0, 0)	0 (0, 0)	0 (0, 0)	0 (0, 0)	0 (0, 0)	0 (0, 0)	0 (0, 0)	0 (0, 0)	0 (0, 0)	0 (0, 0)	0 (0, 0)	0 (0, 0)	0 (0, 0)	0 (0, 0)
Hohhot	Inner Mongolia	Northeast	Male	5 y～	0 (0, 0)	0 (0, 0)	0 (0, 0)	0 (0, 0)	0 (0, 0)	0 (0, 0)	0 (0, 0)	0 (0, 0)	0 (0, 0)	0 (0, 0)	0 (0, 0)	0 (0, 0)	0 (0, 0)	0 (0, 0)	0 (0, 0)	0 (0, 0)	0 (0, 0)	0 (0, 0)	0 (0, 0)	0 (0, 0)	0 (0, 0)	0 (0, 0)	0 (0, 0)	0 (0, 0)	0 (0, 0)	0 (0, 0)	0 (0, 0)	0 (0, 0)
Hohhot	Inner Mongolia	Northeast	Male	10 y～	0 (0, 0)	0 (0, 0)	0 (0, 0)	0 (0, 0)	0 (0, 0)	0 (0, 0)	0 (0, 0)	0 (0, 0)	0 (0, 0)	0 (0, 0)	0 (0, 0)	0 (0, 0)	0 (0, 0)	0 (0, 0)	0 (0, 0)	0 (0, 0)	0 (0, 0)	0 (0, 0)	0 (0, 0)	0 (0, 0)	0 (0, 0)	0 (0, 0)	0 (0, 0)	0 (0, 0)	0 (0, 0)	0 (0, 0)	0 (0, 0)	0 (0, 0)
Hohhot	Inner Mongolia	Northeast	Male	15 y～	0 (0, 0)	0 (0, 0)	0 (0, 0)	1 (1, 1)	0 (0, 0)	0 (0, 0)	0 (0, 0)	0 (0, 0)	0 (0, 0)	0 (0, 0)	0 (0, 0)	0 (0, 0)	0 (0, 0)	0 (0, 0)	0 (0, 0)	0 (0, 0)	0 (0, 0)	0 (0, 0)	0 (0, 0)	0 (0, 0)	0 (0, 0)	0 (0, 0)	0 (0, 0)	0 (0, 0)	0 (0, 0)	1 (0, 1)	0 (0, 0)	1 (1, 1)
Hohhot	Inner Mongolia	Northeast	Male	20 y～	0 (0, 0)	1 (0, 1)	0 (0, 0)	1 (1, 1)	0 (0, 0)	0 (0, 0)	0 (0, 0)	0 (0, 0)	0 (0, 0)	0 (0, 0)	0 (0, 0)	0 (0, 0)	0 (0, 0)	0 (0, 0)	0 (0, 0)	0 (0, 0)	0 (0, 0)	0 (0, 0)	0 (0, 0)	0 (0, 0)	0 (0, 0)	0 (0, 0)	0 (0, 0)	0 (0, 1)	1 (1, 1)	1 (1, 1)	0 (0, 0)	2 (2, 2)
Hohhot	Inner Mongolia	Northeast	Male	25 y～	1 (0, 1)	1 (1, 1)	0 (0, 0)	1 (1, 2)	0 (0, 0)	0 (0, 0)	0 (0, 0)	0 (0, 0)	0 (0, 0)	0 (0, 0)	0 (0, 0)	0 (0, 0)	0 (0, 0)	0 (0, 0)	0 (0, 0)	0 (0, 0)	0 (0, 0)	0 (0, 0)	0 (0, 0)	0 (0, 0)	0 (0, 0)	0 (0, 0)	0 (0, 0)	1 (1, 1)	1 (1, 1)	1 (1, 1)	1 (0, 1)	3 (2, 3)
Hohhot	Inner Mongolia	Northeast	Male	30 y～	2 (1, 2)	2 (2, 2)	1 (1, 1)	5 (4, 5)	0 (0, 0)	0 (0, 0)	0 (0, 0)	0 (0, 0)	0 (0, 0)	0 (0, 0)	0 (0, 0)	0 (0, 0)	0 (0, 0)	0 (0, 0)	0 (0, 0)	0 (0, 0)	0 (0, 0)	0 (0, 0)	0 (0, 0)	0 (0, 0)	1 (1, 1)	1 (1, 1)	1 (0, 1)	3 (2, 3)	3 (2, 3)	3 (3, 4)	2 (1, 2)	8 (7, 9)
Hohhot	Inner Mongolia	Northeast	Male	35 y～	4 (3, 4)	4 (4, 5)	2 (2, 2)	10 (8, 11)	0 (0, 0)	0 (0, 0)	0 (0, 0)	0 (0, 0)	0 (0, 0)	0 (0, 0)	0 (0, 0)	1 (1, 1)	0 (0, 0)	0 (0, 0)	0 (0, 0)	0 (0, 0)	0 (0, 0)	0 (0, 0)	0 (0, 0)	0 (0, 0)	2 (2, 2)	3 (2, 3)	1 (1, 1)	6 (5, 6)	6 (5, 7)	7 (6, 8)	4 (3, 4)	17 (15, 19)
Hohhot	Inner Mongolia	Northeast	Male	40 y～	7 (6, 8)	8 (7, 9)	4 (3, 4)	19 (17, 21)	0 (0, 0)	0 (0, 0)	0 (0, 0)	0 (0, 0)	1 (0, 1)	1 (0, 1)	0 (0, 0)	2 (1, 2)	0 (0, 0)	0 (0, 0)	0 (0, 0)	1 (1, 1)	0 (0, 0)	0 (0, 0)	0 (0, 0)	0 (0, 0)	4 (4, 5)	5 (5, 6)	3 (2, 3)	12 (11, 14)	12 (11, 14)	15 (13, 17)	7 (6, 8)	35 (30, 39)
Hohhot	Inner Mongolia	Northeast	Male	45 y～	9 (8, 10)	10 (8, 11)	6 (5, 6)	24 (21, 26)	0 (0, 0)	0 (0, 0)	0 (0, 0)	1 (1, 1)	1 (1, 1)	1 (1, 1)	1 (0, 1)	3 (2, 3)	0 (0, 0)	0 (0, 0)	0 (0, 0)	1 (0, 1)	0 (0, 0)	0 (0, 0)	0 (0, 0)	1 (0, 1)	7 (6, 8)	7 (6, 8)	4 (4, 5)	18 (16, 21)	18 (15, 20)	19 (16, 21)	11 (9, 12)	47 (40, 53)
Hohhot	Inner Mongolia	Northeast	Male	50 y～	10 (9, 11)	11 (9, 12)	6 (5, 7)	27 (23, 30)	1 (0, 1)	0 (0, 1)	0 (0, 0)	1 (1, 2)	2 (2, 3)	2 (2, 2)	1 (1, 2)	6 (4, 7)	0 (0, 0)	0 (0, 0)	0 (0, 0)	1 (1, 1)	0 (0, 0)	0 (0, 0)	0 (0, 0)	1 (1, 1)	8 (7, 9)	9 (8, 10)	5 (4, 6)	22 (19, 25)	22 (18, 24)	23 (19, 26)	13 (11, 15)	58 (49, 65)
Hohhot	Inner Mongolia	Northeast	Male	55 y～	16 (14, 18)	18 (15, 20)	10 (9, 11)	44 (37, 49)	1 (1, 2)	1 (1, 2)	1 (1, 1)	4 (3, 4)	5 (4, 6)	5 (3, 6)	3 (2, 3)	12 (9, 15)	1 (0, 1)	1 (0, 1)	0 (0, 0)	1 (1, 2)	1 (1, 1)	1 (0, 1)	0 (0, 0)	2 (1, 2)	13 (11, 15)	14 (12, 16)	8 (7, 9)	36 (31, 40)	37 (31, 42)	39 (33, 44)	23 (19, 26)	99 (83, 112)
Hohhot	Inner Mongolia	Northeast	Male	60 y～	12 (10, 13)	14 (12, 15)	7 (6, 8)	33 (28, 36)	2 (2, 2)	2 (2, 2)	1 (1, 1)	5 (4, 6)	6 (4, 7)	5 (4, 6)	3 (2, 3)	13 (10, 16)	1 (1, 1)	1 (0, 1)	0 (0, 0)	2 (1, 2)	1 (0, 1)	0 (0, 1)	0 (0, 0)	1 (1, 1)	11 (10, 13)	13 (11, 15)	7 (6, 8)	31 (27, 35)	32 (26, 36)	35 (29, 40)	18 (15, 21)	85 (71, 97)
Hohhot	Inner Mongolia	Northeast	Male	65 y～	12 (10, 13)	14 (12, 16)	7 (6, 8)	33 (28, 37)	3 (2, 3)	3 (2, 3)	2 (1, 2)	7 (6, 8)	6 (5, 8)	6 (4, 7)	3 (2, 4)	15 (11, 18)	1 (1, 1)	1 (1, 1)	0 (0, 1)	2 (2, 3)	1 (0, 1)	1 (0, 1)	0 (0, 0)	1 (1, 2)	12 (10, 14)	14 (12, 16)	7 (6, 8)	34 (29, 38)	35 (29, 40)	38 (31, 43)	20 (16, 23)	92 (77, 106)
Hohhot	Inner Mongolia	Northeast	Male	70 y～	16 (13, 18)	18 (15, 21)	9 (8, 11)	44 (35, 50)	6 (5, 7)	6 (5, 6)	3 (3, 4)	15 (13, 17)	8 (6, 9)	7 (5, 8)	4 (3, 5)	18 (14, 22)	2 (1, 2)	1 (1, 2)	1 (1, 1)	4 (3, 5)	1 (1, 1)	1 (1, 1)	0 (0, 0)	2 (2, 2)	17 (15, 19)	20 (17, 23)	10 (9, 12)	48 (41, 54)	49 (41, 57)	53 (44, 61)	28 (23, 32)	131 (108, 151)
Hohhot	Inner Mongolia	Northeast	Male	75 y～	17 (14, 19)	20 (16, 23)	10 (8, 12)	47 (38, 54)	9 (8, 11)	8 (7, 9)	5 (4, 5)	22 (18, 25)	7 (5, 8)	6 (5, 7)	3 (3, 4)	16 (12, 20)	2 (2, 3)	2 (2, 2)	1 (1, 1)	5 (4, 7)	1 (1, 1)	1 (1, 1)	0 (0, 1)	2 (2, 3)	18 (15, 20)	21 (18, 24)	11 (9, 12)	50 (43, 56)	54 (44, 63)	58 (48, 67)	31 (25, 35)	143 (117, 165)
Hohhot	Inner Mongolia	Northeast	Male	80 y～	12 (10, 14)	15 (12, 17)	7 (6, 8)	35 (28, 40)	7 (6, 9)	9 (7, 10)	4 (4, 5)	20 (17, 23)	3 (2, 4)	4 (3, 5)	2 (1, 2)	9 (7, 11)	2 (2, 3)	3 (2, 3)	1 (1, 2)	6 (5, 8)	1 (0, 1)	1 (1, 1)	0 (0, 0)	2 (1, 2)	12 (10, 14)	15 (12, 16)	7 (6, 8)	34 (29, 38)	38 (31, 44)	45 (37, 52)	22 (18, 25)	105 (86, 121)
Hohhot	Inner Mongolia	Northeast	Male	85 y～	12 (9, 13)	14 (11, 16)	7 (5, 8)	32 (26, 37)	8 (7, 9)	9 (8, 10)	4 (4, 5)	21 (18, 24)	2 (1, 2)	2 (2, 3)	1 (1, 1)	5 (4, 6)	3 (3, 4)	4 (3, 5)	2 (2, 2)	9 (7, 12)	0 (0, 1)	1 (0, 1)	0 (0, 0)	1 (1, 1)	8 (7, 9)	10 (8, 11)	5 (4, 5)	23 (20, 26)	33 (27, 39)	40 (32, 46)	19 (16, 22)	92 (75, 107)
Hohhot	Inner Mongolia	Northeast	Female	0 y～	0 (0, 0)	0 (0, 0)	0 (0, 0)	0 (0, 0)	0 (0, 0)	0 (0, 0)	0 (0, 0)	0 (0, 0)	0 (0, 0)	0 (0, 0)	0 (0, 0)	0 (0, 0)	0 (0, 0)	0 (0, 0)	0 (0, 0)	0 (0, 0)	0 (0, 0)	0 (0, 0)	0 (0, 0)	0 (0, 0)	0 (0, 0)	0 (0, 0)	0 (0, 0)	0 (0, 0)	0 (0, 0)	0 (0, 0)	0 (0, 0)	0 (0, 0)
Hohhot	Inner Mongolia	Northeast	Female	1 y～	0 (0, 0)	0 (0, 0)	0 (0, 0)	0 (0, 0)	0 (0, 0)	0 (0, 0)	0 (0, 0)	0 (0, 0)	0 (0, 0)	0 (0, 0)	0 (0, 0)	0 (0, 0)	0 (0, 0)	0 (0, 0)	0 (0, 0)	0 (0, 0)	0 (0, 0)	0 (0, 0)	0 (0, 0)	0 (0, 0)	0 (0, 0)	0 (0, 0)	0 (0, 0)	0 (0, 0)	0 (0, 0)	0 (0, 0)	0 (0, 0)	0 (0, 0)
Hohhot	Inner Mongolia	Northeast	Female	5 y～	0 (0, 0)	0 (0, 0)	0 (0, 0)	0 (0, 0)	0 (0, 0)	0 (0, 0)	0 (0, 0)	0 (0, 0)	0 (0, 0)	0 (0, 0)	0 (0, 0)	0 (0, 0)	0 (0, 0)	0 (0, 0)	0 (0, 0)	0 (0, 0)	0 (0, 0)	0 (0, 0)	0 (0, 0)	0 (0, 0)	0 (0, 0)	0 (0, 0)	0 (0, 0)	0 (0, 0)	0 (0, 0)	0 (0, 0)	0 (0, 0)	0 (0, 0)
Hohhot	Inner Mongolia	Northeast	Female	10 y～	0 (0, 0)	0 (0, 0)	0 (0, 0)	0 (0, 0)	0 (0, 0)	0 (0, 0)	0 (0, 0)	0 (0, 0)	0 (0, 0)	0 (0, 0)	0 (0, 0)	0 (0, 0)	0 (0, 0)	0 (0, 0)	0 (0, 0)	0 (0, 0)	0 (0, 0)	0 (0, 0)	0 (0, 0)	0 (0, 0)	0 (0, 0)	0 (0, 0)	0 (0, 0)	0 (0, 0)	0 (0, 0)	0 (0, 0)	0 (0, 0)	0 (0, 0)
Hohhot	Inner Mongolia	Northeast	Female	15 y～	0 (0, 0)	0 (0, 0)	0 (0, 0)	0 (0, 0)	0 (0, 0)	0 (0, 0)	0 (0, 0)	0 (0, 0)	0 (0, 0)	0 (0, 0)	0 (0, 0)	0 (0, 0)	0 (0, 0)	0 (0, 0)	0 (0, 0)	0 (0, 0)	0 (0, 0)	0 (0, 0)	0 (0, 0)	0 (0, 0)	0 (0, 0)	0 (0, 0)	0 (0, 0)	0 (0, 0)	0 (0, 0)	0 (0, 0)	0 (0, 0)	1 (1, 1)
Hohhot	Inner Mongolia	Northeast	Female	20 y～	0 (0, 0)	0 (0, 0)	0 (0, 0)	0 (0, 0)	0 (0, 0)	0 (0, 0)	0 (0, 0)	0 (0, 0)	0 (0, 0)	0 (0, 0)	0 (0, 0)	0 (0, 0)	0 (0, 0)	0 (0, 0)	0 (0, 0)	0 (0, 0)	0 (0, 0)	0 (0, 0)	0 (0, 0)	0 (0, 0)	0 (0, 0)	0 (0, 0)	0 (0, 0)	0 (0, 0)	0 (0, 0)	0 (0, 0)	0 (0, 0)	1 (0, 1)
Hohhot	Inner Mongolia	Northeast	Female	25 y～	0 (0, 0)	0 (0, 0)	0 (0, 0)	1 (0, 1)	0 (0, 0)	0 (0, 0)	0 (0, 0)	0 (0, 0)	0 (0, 0)	0 (0, 0)	0 (0, 0)	0 (0, 0)	0 (0, 0)	0 (0, 0)	0 (0, 0)	0 (0, 0)	0 (0, 0)	0 (0, 0)	0 (0, 0)	0 (0, 0)	0 (0, 0)	0 (0, 0)	0 (0, 0)	0 (0, 0)	0 (0, 0)	1 (0, 1)	0 (0, 0)	1 (1, 1)
Hohhot	Inner Mongolia	Northeast	Female	30 y～	0 (0, 0)	0 (0, 1)	0 (0, 0)	1 (1, 1)	0 (0, 0)	0 (0, 0)	0 (0, 0)	0 (0, 0)	0 (0, 0)	0 (0, 0)	0 (0, 0)	0 (0, 0)	0 (0, 0)	0 (0, 0)	0 (0, 0)	0 (0, 0)	0 (0, 0)	0 (0, 0)	0 (0, 0)	0 (0, 0)	0 (0, 0)	0 (0, 1)	0 (0, 0)	1 (1, 1)	1 (1, 1)	1 (1, 1)	0 (0, 0)	2 (2, 2)
Hohhot	Inner Mongolia	Northeast	Female	35 y～	1 (1, 1)	1 (1, 1)	0 (0, 0)	2 (2, 3)	0 (0, 0)	0 (0, 0)	0 (0, 0)	0 (0, 0)	0 (0, 0)	0 (0, 0)	0 (0, 0)	0 (0, 1)	0 (0, 0)	0 (0, 0)	0 (0, 0)	0 (0, 0)	0 (0, 0)	0 (0, 0)	0 (0, 0)	0 (0, 0)	0 (0, 0)	1 (0, 1)	0 (0, 0)	1 (1, 1)	1 (1, 2)	2 (2, 3)	1 (0, 1)	4 (4, 5)
Hohhot	Inner Mongolia	Northeast	Female	40 y～	1 (1, 1)	2 (2, 2)	0 (0, 1)	4 (3, 4)	0 (0, 0)	0 (0, 0)	0 (0, 0)	0 (0, 0)	0 (0, 0)	0 (0, 1)	0 (0, 0)	1 (1, 1)	0 (0, 0)	0 (0, 0)	0 (0, 0)	0 (0, 0)	0 (0, 0)	0 (0, 0)	0 (0, 0)	0 (0, 0)	1 (1, 1)	2 (2, 2)	0 (0, 0)	3 (3, 4)	3 (2, 3)	5 (4, 5)	1 (1, 1)	8 (7, 9)
Hohhot	Inner Mongolia	Northeast	Female	45 y～	2 (2, 2)	3 (2, 3)	1 (1, 1)	5 (5, 6)	0 (0, 0)	0 (0, 0)	0 (0, 0)	0 (0, 0)	0 (0, 1)	1 (1, 1)	0 (0, 0)	2 (1, 2)	0 (0, 0)	0 (0, 0)	0 (0, 0)	1 (0, 1)	0 (0, 0)	0 (0, 0)	0 (0, 0)	0 (0, 0)	2 (1, 2)	3 (2, 3)	1 (1, 1)	5 (5, 6)	4 (4, 5)	7 (6, 8)	2 (1, 2)	13 (11, 15)
Hohhot	Inner Mongolia	Northeast	Female	50 y～	3 (2, 3)	4 (4, 5)	1 (1, 1)	8 (7, 9)	0 (0, 0)	0 (0, 0)	0 (0, 0)	0 (0, 0)	1 (0, 1)	1 (1, 2)	0 (0, 0)	2 (2, 3)	0 (0, 0)	0 (0, 0)	0 (0, 0)	0 (0, 0)	0 (0, 0)	0 (0, 0)	0 (0, 0)	0 (0, 0)	2 (2, 3)	4 (3, 4)	1 (1, 1)	7 (6, 8)	6 (5, 7)	10 (9, 11)	2 (2, 3)	19 (16, 21)
Hohhot	Inner Mongolia	Northeast	Female	55 y～	4 (4, 5)	7 (6, 8)	2 (1, 2)	13 (11, 15)	0 (0, 0)	1 (1, 1)	0 (0, 0)	1 (1, 1)	1 (1, 1)	3 (2, 3)	1 (0, 1)	4 (3, 5)	0 (0, 0)	0 (0, 1)	0 (0, 0)	1 (1, 1)	0 (0, 0)	0 (0, 0)	0 (0, 0)	1 (1, 1)	3 (3, 4)	6 (5, 6)	1 (1, 2)	10 (9, 12)	10 (8, 11)	17 (14, 19)	4 (3, 4)	30 (25, 34)
Hohhot	Inner Mongolia	Northeast	Female	60 y～	4 (4, 5)	7 (6, 8)	2 (1, 2)	13 (11, 14)	0 (0, 0)	1 (1, 1)	0 (0, 0)	1 (1, 2)	1 (1, 1)	2 (2, 3)	1 (0, 1)	4 (3, 5)	0 (0, 0)	0 (0, 0)	0 (0, 0)	1 (1, 1)	0 (0, 0)	0 (0, 1)	0 (0, 0)	1 (1, 1)	4 (3, 4)	6 (5, 7)	2 (1, 2)	12 (10, 13)	10 (8, 11)	17 (14, 20)	4 (4, 5)	32 (26, 36)
Hohhot	Inner Mongolia	Northeast	Female	65 y～	6 (5, 7)	10 (8, 11)	3 (2, 3)	19 (16, 21)	1 (1, 1)	2 (1, 2)	0 (0, 0)	3 (2, 3)	1 (1, 2)	3 (2, 4)	1 (1, 1)	5 (4, 6)	0 (0, 0)	1 (1, 1)	0 (0, 0)	1 (1, 1)	0 (0, 0)	1 (1, 1)	0 (0, 0)	1 (1, 1)	5 (5, 6)	9 (8, 10)	2 (2, 3)	17 (14, 19)	15 (12, 17)	25 (21, 29)	6 (5, 7)	46 (38, 52)
Hohhot	Inner Mongolia	Northeast	Female	70 y～	10 (8, 11)	15 (13, 18)	4 (3, 4)	29 (24, 33)	2 (1, 2)	3 (3, 4)	1 (1, 1)	5 (5, 6)	2 (1, 2)	4 (3, 5)	1 (1, 1)	6 (5, 8)	1 (0, 1)	1 (1, 1)	0 (0, 0)	2 (2, 2)	1 (0, 1)	1 (1, 1)	0 (0, 0)	2 (2, 2)	9 (7, 10)	14 (12, 16)	4 (3, 4)	26 (23, 30)	23 (19, 26)	39 (32, 45)	9 (8, 11)	71 (59, 82)
Hohhot	Inner Mongolia	Northeast	Female	75 y～	12 (10, 14)	19 (16, 22)	5 (4, 6)	36 (29, 42)	2 (2, 3)	5 (4, 6)	1 (1, 1)	9 (7, 10)	2 (1, 2)	4 (3, 5)	1 (1, 1)	7 (5, 8)	1 (1, 1)	2 (2, 2)	0 (0, 1)	3 (3, 4)	1 (1, 1)	1 (1, 2)	0 (0, 0)	2 (2, 3)	11 (9, 12)	18 (15, 20)	4 (4, 5)	33 (28, 37)	29 (24, 33)	50 (41, 57)	12 (10, 14)	91 (75, 105)
Hohhot	Inner Mongolia	Northeast	Female	80 y～	10 (8, 12)	17 (13, 19)	4 (3, 5)	31 (25, 36)	3 (2, 3)	5 (4, 6)	1 (1, 2)	9 (8, 11)	1 (1, 2)	2 (2, 3)	1 (0, 1)	4 (3, 5)	1 (1, 2)	2 (2, 3)	1 (0, 1)	4 (3, 5)	0 (0, 1)	1 (1, 1)	0 (0, 0)	2 (1, 2)	8 (7, 9)	13 (11, 15)	3 (3, 4)	24 (21, 28)	24 (20, 28)	40 (33, 46)	10 (8, 12)	74 (61, 86)
Hohhot	Inner Mongolia	Northeast	Female	85 y～	12 (9, 14)	19 (15, 22)	5 (4, 5)	36 (28, 41)	4 (4, 5)	7 (6, 8)	2 (2, 2)	14 (11, 16)	1 (1, 1)	1 (1, 2)	0 (0, 0)	3 (2, 3)	2 (2, 3)	4 (3, 5)	1 (1, 1)	7 (5, 9)	0 (0, 0)	1 (1, 1)	0 (0, 0)	1 (1, 1)	7 (6, 8)	12 (10, 14)	3 (2, 3)	22 (19, 25)	27 (22, 31)	44 (36, 52)	11 (9, 13)	82 (67, 96)
Hulun Buir	Inner Mongolia	Northeast	Male	0 y～	0 (0, 0)	0 (0, 0)	0 (0, 0)	0 (0, 0)	0 (0, 0)	0 (0, 0)	0 (0, 0)	0 (0, 0)	0 (0, 0)	0 (0, 0)	0 (0, 0)	0 (0, 0)	0 (0, 0)	0 (0, 0)	0 (0, 0)	0 (0, 0)	0 (0, 0)	0 (0, 0)	0 (0, 0)	0 (0, 0)	0 (0, 0)	0 (0, 0)	0 (0, 0)	0 (0, 0)	0 (0, 0)	0 (0, 0)	0 (0, 0)	0 (0, 0)
Hulun Buir	Inner Mongolia	Northeast	Male	1 y～	0 (0, 0)	0 (0, 0)	0 (0, 0)	0 (0, 0)	0 (0, 0)	0 (0, 0)	0 (0, 0)	0 (0, 0)	0 (0, 0)	0 (0, 0)	0 (0, 0)	0 (0, 0)	0 (0, 0)	0 (0, 0)	0 (0, 0)	0 (0, 0)	0 (0, 0)	0 (0, 0)	0 (0, 0)	0 (0, 0)	0 (0, 0)	0 (0, 0)	0 (0, 0)	0 (0, 0)	0 (0, 0)	0 (0, 0)	0 (0, 0)	0 (0, 0)
Hulun Buir	Inner Mongolia	Northeast	Male	5 y～	0 (0, 0)	0 (0, 0)	0 (0, 0)	0 (0, 0)	0 (0, 0)	0 (0, 0)	0 (0, 0)	0 (0, 0)	0 (0, 0)	0 (0, 0)	0 (0, 0)	0 (0, 0)	0 (0, 0)	0 (0, 0)	0 (0, 0)	0 (0, 0)	0 (0, 0)	0 (0, 0)	0 (0, 0)	0 (0, 0)	0 (0, 0)	0 (0, 0)	0 (0, 0)	0 (0, 0)	0 (0, 0)	0 (0, 0)	0 (0, 0)	0 (0, 0)
Hulun Buir	Inner Mongolia	Northeast	Male	10 y～	0 (0, 0)	0 (0, 0)	0 (0, 0)	0 (0, 0)	0 (0, 0)	0 (0, 0)	0 (0, 0)	0 (0, 0)	0 (0, 0)	0 (0, 0)	0 (0, 0)	0 (0, 0)	0 (0, 0)	0 (0, 0)	0 (0, 0)	0 (0, 0)	0 (0, 0)	0 (0, 0)	0 (0, 0)	0 (0, 0)	0 (0, 0)	0 (0, 0)	0 (0, 0)	0 (0, 0)	0 (0, 0)	0 (0, 0)	0 (0, 0)	0 (0, 0)
Hulun Buir	Inner Mongolia	Northeast	Male	15 y～	0 (0, 0)	0 (0, 0)	0 (0, 0)	0 (0, 0)	0 (0, 0)	0 (0, 0)	0 (0, 0)	0 (0, 0)	0 (0, 0)	0 (0, 0)	0 (0, 0)	0 (0, 0)	0 (0, 0)	0 (0, 0)	0 (0, 0)	0 (0, 0)	0 (0, 0)	0 (0, 0)	0 (0, 0)	0 (0, 0)	0 (0, 0)	0 (0, 0)	0 (0, 0)	0 (0, 0)	0 (0, 0)	0 (0, 0)	0 (0, 0)	0 (0, 0)
Hulun Buir	Inner Mongolia	Northeast	Male	20 y～	0 (0, 0)	0 (0, 0)	0 (0, 0)	0 (0, 0)	0 (0, 0)	0 (0, 0)	0 (0, 0)	0 (0, 0)	0 (0, 0)	0 (0, 0)	0 (0, 0)	0 (0, 0)	0 (0, 0)	0 (0, 0)	0 (0, 0)	0 (0, 0)	0 (0, 0)	0 (0, 0)	0 (0, 0)	0 (0, 0)	0 (0, 0)	0 (0, 0)	0 (0, 0)	0 (0, 0)	0 (0, 0)	0 (0, 0)	0 (0, 0)	0 (0, 1)
Hulun Buir	Inner Mongolia	Northeast	Male	25 y～	0 (0, 0)	0 (0, 0)	0 (0, 0)	0 (0, 0)	0 (0, 0)	0 (0, 0)	0 (0, 0)	0 (0, 0)	0 (0, 0)	0 (0, 0)	0 (0, 0)	0 (0, 0)	0 (0, 0)	0 (0, 0)	0 (0, 0)	0 (0, 0)	0 (0, 0)	0 (0, 0)	0 (0, 0)	0 (0, 0)	0 (0, 0)	0 (0, 0)	0 (0, 0)	0 (0, 0)	0 (0, 0)	0 (0, 0)	0 (0, 0)	1 (1, 1)
Hulun Buir	Inner Mongolia	Northeast	Male	30 y～	0 (0, 0)	1 (1, 1)	0 (0, 0)	1 (1, 1)	0 (0, 0)	0 (0, 0)	0 (0, 0)	0 (0, 0)	0 (0, 0)	0 (0, 0)	0 (0, 0)	0 (0, 0)	0 (0, 0)	0 (0, 0)	0 (0, 0)	0 (0, 0)	0 (0, 0)	0 (0, 0)	0 (0, 0)	0 (0, 0)	0 (0, 0)	0 (0, 0)	0 (0, 0)	1 (1, 1)	0 (0, 0)	1 (1, 1)	0 (0, 0)	2 (2, 2)
Hulun Buir	Inner Mongolia	Northeast	Male	35 y～	1 (0, 1)	1 (1, 1)	1 (0, 1)	2 (2, 3)	0 (0, 0)	0 (0, 0)	0 (0, 0)	0 (0, 0)	0 (0, 0)	0 (0, 0)	0 (0, 0)	0 (0, 0)	0 (0, 0)	0 (0, 0)	0 (0, 0)	0 (0, 0)	0 (0, 0)	0 (0, 0)	0 (0, 0)	0 (0, 0)	0 (0, 0)	1 (1, 1)	0 (0, 0)	1 (1, 2)	1 (1, 1)	2 (2, 3)	1 (1, 1)	4 (4, 5)
Hulun Buir	Inner Mongolia	Northeast	Male	40 y～	1 (1, 1)	3 (2, 3)	1 (1, 1)	5 (4, 5)	0 (0, 0)	0 (0, 0)	0 (0, 0)	0 (0, 0)	0 (0, 0)	0 (0, 0)	0 (0, 0)	0 (0, 0)	0 (0, 0)	0 (0, 0)	0 (0, 0)	0 (0, 0)	0 (0, 0)	0 (0, 0)	0 (0, 0)	0 (0, 0)	1 (1, 1)	2 (1, 2)	1 (1, 1)	3 (3, 3)	2 (2, 2)	5 (4, 5)	2 (2, 2)	8 (7, 9)
Hulun Buir	Inner Mongolia	Northeast	Male	45 y～	1 (1, 1)	3 (3, 3)	1 (1, 2)	6 (5, 6)	0 (0, 0)	0 (0, 0)	0 (0, 0)	0 (0, 0)	0 (0, 0)	0 (0, 0)	0 (0, 0)	1 (1, 1)	0 (0, 0)	0 (0, 0)	0 (0, 0)	0 (0, 0)	0 (0, 0)	0 (0, 0)	0 (0, 0)	0 (0, 0)	1 (1, 1)	2 (2, 3)	1 (1, 1)	4 (4, 5)	3 (2, 3)	6 (5, 7)	3 (2, 3)	11 (10, 13)
Hulun Buir	Inner Mongolia	Northeast	Male	50 y～	1 (1, 2)	3 (3, 4)	2 (1, 2)	7 (5, 7)	0 (0, 0)	0 (0, 0)	0 (0, 0)	0 (0, 0)	0 (0, 0)	1 (0, 1)	0 (0, 0)	1 (1, 2)	0 (0, 0)	0 (0, 0)	0 (0, 0)	0 (0, 0)	0 (0, 0)	0 (0, 0)	0 (0, 0)	0 (0, 0)	1 (1, 1)	3 (2, 3)	1 (1, 1)	5 (5, 6)	3 (3, 4)	7 (6, 8)	3 (3, 4)	14 (12, 16)
Hulun Buir	Inner Mongolia	Northeast	Male	55 y～	2 (2, 3)	6 (5, 6)	3 (2, 3)	11 (9, 12)	0 (0, 0)	0 (0, 0)	0 (0, 0)	1 (1, 1)	1 (1, 1)	1 (1, 2)	1 (1, 1)	3 (2, 4)	0 (0, 0)	0 (0, 0)	0 (0, 0)	0 (0, 0)	0 (0, 0)	0 (0, 0)	0 (0, 0)	0 (0, 0)	2 (2, 2)	4 (4, 5)	2 (2, 2)	9 (7, 10)	6 (5, 6)	12 (10, 14)	6 (5, 7)	24 (20, 27)
Hulun Buir	Inner Mongolia	Northeast	Male	60 y～	2 (1, 2)	4 (3, 5)	2 (2, 2)	8 (6, 9)	0 (0, 0)	1 (0, 1)	0 (0, 0)	1 (1, 1)	1 (1, 1)	1 (1, 2)	1 (1, 1)	3 (2, 4)	0 (0, 0)	0 (0, 0)	0 (0, 0)	0 (0, 0)	0 (0, 0)	0 (0, 0)	0 (0, 0)	0 (0, 0)	2 (1, 2)	4 (3, 5)	2 (1, 2)	7 (6, 8)	5 (4, 5)	11 (9, 12)	5 (4, 6)	20 (16, 23)
Hulun Buir	Inner Mongolia	Northeast	Male	65 y～	2 (1, 2)	4 (3, 5)	2 (2, 2)	8 (6, 9)	0 (0, 1)	1 (1, 1)	0 (0, 0)	2 (1, 2)	1 (1, 1)	2 (1, 2)	1 (1, 1)	3 (3, 4)	0 (0, 0)	0 (0, 0)	0 (0, 0)	1 (0, 1)	0 (0, 0)	0 (0, 0)	0 (0, 0)	0 (0, 0)	2 (1, 2)	4 (4, 5)	2 (2, 2)	8 (7, 9)	5 (4, 6)	11 (9, 13)	5 (4, 6)	22 (18, 25)
Hulun Buir	Inner Mongolia	Northeast	Male	70 y～	2 (2, 3)	6 (4, 6)	2 (2, 3)	10 (8, 12)	1 (1, 1)	2 (1, 2)	1 (1, 1)	4 (3, 4)	1 (1, 1)	2 (2, 3)	1 (1, 1)	4 (3, 5)	0 (0, 0)	0 (0, 1)	0 (0, 0)	1 (1, 1)	0 (0, 0)	0 (0, 0)	0 (0, 0)	0 (0, 1)	2 (2, 3)	6 (5, 7)	3 (2, 3)	11 (9, 13)	7 (6, 9)	16 (13, 19)	7 (6, 9)	31 (25, 36)
Hulun Buir	Inner Mongolia	Northeast	Male	75 y～	2 (2, 3)	6 (5, 7)	3 (2, 3)	11 (9, 13)	1 (1, 2)	2 (2, 3)	1 (1, 1)	5 (4, 6)	1 (1, 1)	2 (1, 2)	1 (1, 1)	4 (3, 5)	0 (0, 0)	1 (0, 1)	0 (0, 0)	1 (1, 2)	0 (0, 0)	0 (0, 0)	0 (0, 0)	1 (0, 1)	3 (2, 3)	6 (5, 7)	3 (2, 3)	12 (10, 13)	8 (6, 9)	17 (14, 20)	8 (6, 9)	33 (27, 39)
Hulun Buir	Inner Mongolia	Northeast	Male	80 y～	2 (1, 2)	5 (4, 5)	2 (1, 2)	8 (7, 10)	1 (1, 1)	3 (2, 3)	1 (1, 1)	5 (4, 6)	0 (0, 1)	1 (1, 1)	0 (0, 1)	2 (2, 3)	0 (0, 0)	1 (1, 1)	0 (0, 0)	1 (1, 2)	0 (0, 0)	0 (0, 0)	0 (0, 0)	0 (0, 0)	2 (1, 2)	4 (4, 5)	2 (2, 2)	8 (7, 9)	6 (5, 7)	14 (11, 16)	6 (5, 7)	25 (20, 29)
Hulun Buir	Inner Mongolia	Northeast	Male	85 y～	2 (1, 2)	4 (3, 5)	2 (1, 2)	8 (6, 9)	1 (1, 1)	3 (2, 3)	1 (1, 1)	5 (4, 6)	0 (0, 0)	1 (1, 1)	0 (0, 0)	1 (1, 2)	1 (0, 1)	1 (1, 1)	1 (0, 1)	2 (2, 3)	0 (0, 0)	0 (0, 0)	0 (0, 0)	0 (0, 0)	1 (1, 1)	3 (3, 3)	1 (1, 1)	5 (5, 6)	5 (4, 6)	12 (10, 14)	5 (4, 6)	22 (18, 26)
Hulun Buir	Inner Mongolia	Northeast	Female	0 y～	0 (0, 0)	0 (0, 0)	0 (0, 0)	0 (0, 0)	0 (0, 0)	0 (0, 0)	0 (0, 0)	0 (0, 0)	0 (0, 0)	0 (0, 0)	0 (0, 0)	0 (0, 0)	0 (0, 0)	0 (0, 0)	0 (0, 0)	0 (0, 0)	0 (0, 0)	0 (0, 0)	0 (0, 0)	0 (0, 0)	0 (0, 0)	0 (0, 0)	0 (0, 0)	0 (0, 0)	0 (0, 0)	0 (0, 0)	0 (0, 0)	0 (0, 0)
Hulun Buir	Inner Mongolia	Northeast	Female	1 y～	0 (0, 0)	0 (0, 0)	0 (0, 0)	0 (0, 0)	0 (0, 0)	0 (0, 0)	0 (0, 0)	0 (0, 0)	0 (0, 0)	0 (0, 0)	0 (0, 0)	0 (0, 0)	0 (0, 0)	0 (0, 0)	0 (0, 0)	0 (0, 0)	0 (0, 0)	0 (0, 0)	0 (0, 0)	0 (0, 0)	0 (0, 0)	0 (0, 0)	0 (0, 0)	0 (0, 0)	0 (0, 0)	0 (0, 0)	0 (0, 0)	0 (0, 0)
Hulun Buir	Inner Mongolia	Northeast	Female	5 y～	0 (0, 0)	0 (0, 0)	0 (0, 0)	0 (0, 0)	0 (0, 0)	0 (0, 0)	0 (0, 0)	0 (0, 0)	0 (0, 0)	0 (0, 0)	0 (0, 0)	0 (0, 0)	0 (0, 0)	0 (0, 0)	0 (0, 0)	0 (0, 0)	0 (0, 0)	0 (0, 0)	0 (0, 0)	0 (0, 0)	0 (0, 0)	0 (0, 0)	0 (0, 0)	0 (0, 0)	0 (0, 0)	0 (0, 0)	0 (0, 0)	0 (0, 0)
Hulun Buir	Inner Mongolia	Northeast	Female	10 y～	0 (0, 0)	0 (0, 0)	0 (0, 0)	0 (0, 0)	0 (0, 0)	0 (0, 0)	0 (0, 0)	0 (0, 0)	0 (0, 0)	0 (0, 0)	0 (0, 0)	0 (0, 0)	0 (0, 0)	0 (0, 0)	0 (0, 0)	0 (0, 0)	0 (0, 0)	0 (0, 0)	0 (0, 0)	0 (0, 0)	0 (0, 0)	0 (0, 0)	0 (0, 0)	0 (0, 0)	0 (0, 0)	0 (0, 0)	0 (0, 0)	0 (0, 0)
Hulun Buir	Inner Mongolia	Northeast	Female	15 y～	0 (0, 0)	0 (0, 0)	0 (0, 0)	0 (0, 0)	0 (0, 0)	0 (0, 0)	0 (0, 0)	0 (0, 0)	0 (0, 0)	0 (0, 0)	0 (0, 0)	0 (0, 0)	0 (0, 0)	0 (0, 0)	0 (0, 0)	0 (0, 0)	0 (0, 0)	0 (0, 0)	0 (0, 0)	0 (0, 0)	0 (0, 0)	0 (0, 0)	0 (0, 0)	0 (0, 0)	0 (0, 0)	0 (0, 0)	0 (0, 0)	0 (0, 0)
Hulun Buir	Inner Mongolia	Northeast	Female	20 y～	0 (0, 0)	0 (0, 0)	0 (0, 0)	0 (0, 0)	0 (0, 0)	0 (0, 0)	0 (0, 0)	0 (0, 0)	0 (0, 0)	0 (0, 0)	0 (0, 0)	0 (0, 0)	0 (0, 0)	0 (0, 0)	0 (0, 0)	0 (0, 0)	0 (0, 0)	0 (0, 0)	0 (0, 0)	0 (0, 0)	0 (0, 0)	0 (0, 0)	0 (0, 0)	0 (0, 0)	0 (0, 0)	0 (0, 0)	0 (0, 0)	0 (0, 0)
Hulun Buir	Inner Mongolia	Northeast	Female	25 y～	0 (0, 0)	0 (0, 0)	0 (0, 0)	0 (0, 0)	0 (0, 0)	0 (0, 0)	0 (0, 0)	0 (0, 0)	0 (0, 0)	0 (0, 0)	0 (0, 0)	0 (0, 0)	0 (0, 0)	0 (0, 0)	0 (0, 0)	0 (0, 0)	0 (0, 0)	0 (0, 0)	0 (0, 0)	0 (0, 0)	0 (0, 0)	0 (0, 0)	0 (0, 0)	0 (0, 0)	0 (0, 0)	0 (0, 0)	0 (0, 0)	0 (0, 0)
Hulun Buir	Inner Mongolia	Northeast	Female	30 y～	0 (0, 0)	0 (0, 0)	0 (0, 0)	0 (0, 0)	0 (0, 0)	0 (0, 0)	0 (0, 0)	0 (0, 0)	0 (0, 0)	0 (0, 0)	0 (0, 0)	0 (0, 0)	0 (0, 0)	0 (0, 0)	0 (0, 0)	0 (0, 0)	0 (0, 0)	0 (0, 0)	0 (0, 0)	0 (0, 0)	0 (0, 0)	0 (0, 0)	0 (0, 0)	0 (0, 0)	0 (0, 0)	0 (0, 0)	0 (0, 0)	0 (0, 1)
Hulun Buir	Inner Mongolia	Northeast	Female	35 y～	0 (0, 0)	0 (0, 0)	0 (0, 0)	1 (1, 1)	0 (0, 0)	0 (0, 0)	0 (0, 0)	0 (0, 0)	0 (0, 0)	0 (0, 0)	0 (0, 0)	0 (0, 0)	0 (0, 0)	0 (0, 0)	0 (0, 0)	0 (0, 0)	0 (0, 0)	0 (0, 0)	0 (0, 0)	0 (0, 0)	0 (0, 0)	0 (0, 0)	0 (0, 0)	0 (0, 0)	0 (0, 0)	1 (1, 1)	0 (0, 0)	1 (1, 1)
Hulun Buir	Inner Mongolia	Northeast	Female	40 y～	0 (0, 0)	1 (1, 1)	0 (0, 0)	1 (1, 1)	0 (0, 0)	0 (0, 0)	0 (0, 0)	0 (0, 0)	0 (0, 0)	0 (0, 0)	0 (0, 0)	0 (0, 0)	0 (0, 0)	0 (0, 0)	0 (0, 0)	0 (0, 0)	0 (0, 0)	0 (0, 0)	0 (0, 0)	0 (0, 0)	0 (0, 0)	1 (0, 1)	0 (0, 0)	1 (1, 1)	0 (0, 0)	1 (1, 2)	0 (0, 0)	2 (2, 2)
Hulun Buir	Inner Mongolia	Northeast	Female	45 y～	0 (0, 0)	1 (1, 1)	0 (0, 0)	1 (1, 1)	0 (0, 0)	0 (0, 0)	0 (0, 0)	0 (0, 0)	0 (0, 0)	0 (0, 0)	0 (0, 0)	0 (0, 1)	0 (0, 0)	0 (0, 0)	0 (0, 0)	0 (0, 0)	0 (0, 0)	0 (0, 0)	0 (0, 0)	0 (0, 0)	0 (0, 0)	1 (1, 1)	0 (0, 0)	1 (1, 1)	1 (1, 1)	2 (2, 2)	0 (0, 1)	3 (3, 4)
Hulun Buir	Inner Mongolia	Northeast	Female	50 y～	0 (0, 0)	1 (1, 1)	0 (0, 0)	2 (2, 2)	0 (0, 0)	0 (0, 0)	0 (0, 0)	0 (0, 0)	0 (0, 0)	0 (0, 0)	0 (0, 0)	1 (0, 1)	0 (0, 0)	0 (0, 0)	0 (0, 0)	0 (0, 0)	0 (0, 0)	0 (0, 0)	0 (0, 0)	0 (0, 0)	0 (0, 0)	1 (1, 1)	0 (0, 0)	2 (2, 2)	1 (1, 1)	3 (2, 3)	1 (1, 1)	5 (4, 5)
Hulun Buir	Inner Mongolia	Northeast	Female	55 y～	1 (1, 1)	2 (2, 2)	0 (0, 1)	3 (3, 4)	0 (0, 0)	0 (0, 0)	0 (0, 0)	0 (0, 0)	0 (0, 0)	1 (1, 1)	0 (0, 0)	1 (1, 1)	0 (0, 0)	0 (0, 0)	0 (0, 0)	0 (0, 0)	0 (0, 0)	0 (0, 0)	0 (0, 0)	0 (0, 0)	1 (0, 1)	2 (1, 2)	0 (0, 0)	3 (2, 3)	1 (1, 2)	5 (4, 6)	1 (1, 1)	7 (6, 8)
Hulun Buir	Inner Mongolia	Northeast	Female	60 y～	1 (1, 1)	2 (2, 2)	0 (0, 1)	3 (3, 4)	0 (0, 0)	0 (0, 0)	0 (0, 0)	0 (0, 0)	0 (0, 0)	1 (1, 1)	0 (0, 0)	1 (1, 1)	0 (0, 0)	0 (0, 0)	0 (0, 0)	0 (0, 0)	0 (0, 0)	0 (0, 0)	0 (0, 0)	0 (0, 0)	1 (0, 1)	2 (2, 2)	0 (0, 0)	3 (2, 3)	1 (1, 2)	5 (4, 6)	1 (1, 1)	8 (6, 9)
Hulun Buir	Inner Mongolia	Northeast	Female	65 y～	1 (1, 1)	3 (2, 3)	1 (1, 1)	5 (4, 5)	0 (0, 0)	0 (0, 1)	0 (0, 0)	1 (1, 1)	0 (0, 0)	1 (1, 1)	0 (0, 0)	1 (1, 2)	0 (0, 0)	0 (0, 0)	0 (0, 0)	0 (0, 0)	0 (0, 0)	0 (0, 0)	0 (0, 0)	0 (0, 0)	1 (1, 1)	3 (2, 3)	1 (0, 1)	4 (3, 5)	2 (2, 2)	7 (6, 8)	2 (1, 2)	11 (9, 13)
Hulun Buir	Inner Mongolia	Northeast	Female	70 y～	1 (1, 2)	5 (4, 5)	1 (1, 1)	7 (6, 8)	0 (0, 0)	1 (1, 1)	0 (0, 0)	1 (1, 2)	0 (0, 0)	1 (1, 1)	0 (0, 0)	2 (1, 2)	0 (0, 0)	0 (0, 0)	0 (0, 0)	0 (0, 1)	0 (0, 0)	0 (0, 0)	0 (0, 0)	0 (0, 1)	1 (1, 1)	4 (4, 5)	1 (1, 1)	6 (5, 7)	3 (3, 4)	11 (9, 13)	2 (2, 3)	17 (14, 20)
Hulun Buir	Inner Mongolia	Northeast	Female	75 y～	2 (1, 2)	6 (5, 7)	1 (1, 1)	9 (7, 10)	0 (0, 0)	1 (1, 2)	0 (0, 0)	2 (2, 2)	0 (0, 0)	1 (1, 1)	0 (0, 0)	2 (1, 2)	0 (0, 0)	1 (0, 1)	0 (0, 0)	1 (1, 1)	0 (0, 0)	0 (0, 0)	0 (0, 0)	1 (0, 1)	2 (1, 2)	5 (4, 6)	1 (1, 1)	8 (7, 9)	4 (3, 5)	15 (12, 17)	3 (3, 4)	22 (18, 25)
Hulun Buir	Inner Mongolia	Northeast	Female	80 y～	1 (1, 2)	5 (4, 6)	1 (1, 1)	7 (6, 8)	0 (0, 0)	1 (1, 2)	0 (0, 0)	2 (2, 3)	0 (0, 0)	1 (0, 1)	0 (0, 0)	1 (1, 1)	0 (0, 0)	1 (0, 1)	0 (0, 0)	1 (1, 1)	0 (0, 0)	0 (0, 0)	0 (0, 0)	0 (0, 0)	1 (1, 1)	4 (3, 4)	1 (1, 1)	6 (5, 6)	3 (3, 4)	11 (9, 13)	3 (2, 3)	17 (14, 20)
Hulun Buir	Inner Mongolia	Northeast	Female	85 y～	2 (1, 2)	5 (4, 6)	1 (1, 1)	8 (6, 10)	1 (1, 1)	2 (2, 2)	1 (0, 1)	3 (3, 4)	0 (0, 0)	0 (0, 1)	0 (0, 0)	1 (0, 1)	0 (0, 0)	1 (1, 1)	0 (0, 0)	2 (1, 2)	0 (0, 0)	0 (0, 0)	0 (0, 0)	0 (0, 0)	1 (1, 1)	3 (3, 4)	1 (1, 1)	5 (4, 6)	4 (3, 5)	12 (10, 15)	3 (2, 3)	19 (15, 23)
Tongliao	Inner Mongolia	Northeast	Male	0 y～	0 (0, 0)	0 (0, 0)	0 (0, 0)	0 (0, 0)	0 (0, 0)	0 (0, 0)	0 (0, 0)	0 (0, 0)	0 (0, 0)	0 (0, 0)	0 (0, 0)	0 (0, 0)	0 (0, 0)	0 (0, 0)	0 (0, 0)	0 (0, 0)	0 (0, 0)	0 (0, 0)	0 (0, 0)	0 (0, 0)	0 (0, 0)	0 (0, 0)	0 (0, 0)	0 (0, 0)	0 (0, 0)	0 (0, 0)	0 (0, 0)	0 (0, 0)
Tongliao	Inner Mongolia	Northeast	Male	1 y～	0 (0, 0)	0 (0, 0)	0 (0, 0)	0 (0, 0)	0 (0, 0)	0 (0, 0)	0 (0, 0)	0 (0, 0)	0 (0, 0)	0 (0, 0)	0 (0, 0)	0 (0, 0)	0 (0, 0)	0 (0, 0)	0 (0, 0)	0 (0, 0)	0 (0, 0)	0 (0, 0)	0 (0, 0)	0 (0, 0)	0 (0, 0)	0 (0, 0)	0 (0, 0)	0 (0, 0)	0 (0, 0)	0 (0, 0)	0 (0, 0)	0 (0, 0)
Tongliao	Inner Mongolia	Northeast	Male	5 y～	0 (0, 0)	0 (0, 0)	0 (0, 0)	0 (0, 0)	0 (0, 0)	0 (0, 0)	0 (0, 0)	0 (0, 0)	0 (0, 0)	0 (0, 0)	0 (0, 0)	0 (0, 0)	0 (0, 0)	0 (0, 0)	0 (0, 0)	0 (0, 0)	0 (0, 0)	0 (0, 0)	0 (0, 0)	0 (0, 0)	0 (0, 0)	0 (0, 0)	0 (0, 0)	0 (0, 0)	0 (0, 0)	0 (0, 0)	0 (0, 0)	0 (0, 0)
Tongliao	Inner Mongolia	Northeast	Male	10 y～	0 (0, 0)	0 (0, 0)	0 (0, 0)	0 (0, 0)	0 (0, 0)	0 (0, 0)	0 (0, 0)	0 (0, 0)	0 (0, 0)	0 (0, 0)	0 (0, 0)	0 (0, 0)	0 (0, 0)	0 (0, 0)	0 (0, 0)	0 (0, 0)	0 (0, 0)	0 (0, 0)	0 (0, 0)	0 (0, 0)	0 (0, 0)	0 (0, 0)	0 (0, 0)	0 (0, 0)	0 (0, 0)	0 (0, 0)	0 (0, 0)	0 (0, 0)
Tongliao	Inner Mongolia	Northeast	Male	15 y～	0 (0, 0)	0 (0, 0)	0 (0, 0)	0 (0, 1)	0 (0, 0)	0 (0, 0)	0 (0, 0)	0 (0, 0)	0 (0, 0)	0 (0, 0)	0 (0, 0)	0 (0, 0)	0 (0, 0)	0 (0, 0)	0 (0, 0)	0 (0, 0)	0 (0, 0)	0 (0, 0)	0 (0, 0)	0 (0, 0)	0 (0, 0)	0 (0, 0)	0 (0, 0)	0 (0, 0)	0 (0, 0)	0 (0, 0)	0 (0, 0)	1 (1, 1)
Tongliao	Inner Mongolia	Northeast	Male	20 y～	0 (0, 0)	0 (0, 0)	0 (0, 0)	1 (1, 1)	0 (0, 0)	0 (0, 0)	0 (0, 0)	0 (0, 0)	0 (0, 0)	0 (0, 0)	0 (0, 0)	0 (0, 0)	0 (0, 0)	0 (0, 0)	0 (0, 0)	0 (0, 0)	0 (0, 0)	0 (0, 0)	0 (0, 0)	0 (0, 0)	0 (0, 0)	0 (0, 0)	0 (0, 0)	0 (0, 0)	0 (0, 0)	0 (0, 1)	0 (0, 0)	1 (1, 1)
Tongliao	Inner Mongolia	Northeast	Male	25 y～	0 (0, 0)	0 (0, 0)	0 (0, 0)	1 (1, 1)	0 (0, 0)	0 (0, 0)	0 (0, 0)	0 (0, 0)	0 (0, 0)	0 (0, 0)	0 (0, 0)	0 (0, 0)	0 (0, 0)	0 (0, 0)	0 (0, 0)	0 (0, 0)	0 (0, 0)	0 (0, 0)	0 (0, 0)	0 (0, 0)	0 (0, 0)	0 (0, 0)	0 (0, 0)	1 (1, 1)	1 (0, 1)	1 (1, 1)	0 (0, 0)	2 (1, 2)
Tongliao	Inner Mongolia	Northeast	Male	30 y～	1 (1, 1)	1 (1, 1)	1 (1, 1)	3 (2, 3)	0 (0, 0)	0 (0, 0)	0 (0, 0)	0 (0, 0)	0 (0, 0)	0 (0, 0)	0 (0, 0)	0 (0, 0)	0 (0, 0)	0 (0, 0)	0 (0, 0)	0 (0, 0)	0 (0, 0)	0 (0, 0)	0 (0, 0)	0 (0, 0)	1 (0, 1)	1 (1, 1)	0 (0, 0)	2 (1, 2)	2 (1, 2)	2 (2, 2)	1 (1, 1)	5 (4, 5)
Tongliao	Inner Mongolia	Northeast	Male	35 y～	2 (2, 2)	2 (2, 3)	1 (1, 2)	6 (5, 6)	0 (0, 0)	0 (0, 0)	0 (0, 0)	0 (0, 0)	0 (0, 0)	0 (0, 0)	0 (0, 0)	1 (0, 1)	0 (0, 0)	0 (0, 0)	0 (0, 0)	0 (0, 0)	0 (0, 0)	0 (0, 0)	0 (0, 0)	0 (0, 0)	1 (1, 1)	1 (1, 2)	1 (1, 1)	3 (3, 4)	3 (3, 4)	4 (4, 5)	3 (2, 3)	10 (9, 11)
Tongliao	Inner Mongolia	Northeast	Male	40 y～	4 (3, 4)	5 (4, 5)	3 (2, 3)	11 (10, 12)	0 (0, 0)	0 (0, 0)	0 (0, 0)	0 (0, 0)	0 (0, 0)	0 (0, 0)	0 (0, 0)	1 (1, 1)	0 (0, 0)	0 (0, 0)	0 (0, 0)	0 (0, 1)	0 (0, 0)	0 (0, 0)	0 (0, 0)	0 (0, 0)	2 (2, 3)	3 (3, 3)	2 (2, 2)	7 (6, 8)	7 (6, 8)	8 (7, 9)	5 (4, 6)	20 (17, 23)
Tongliao	Inner Mongolia	Northeast	Male	45 y～	5 (4, 5)	5 (5, 6)	4 (3, 4)	14 (12, 16)	0 (0, 0)	0 (0, 0)	0 (0, 0)	0 (0, 1)	1 (0, 1)	1 (0, 1)	0 (0, 1)	2 (1, 2)	0 (0, 0)	0 (0, 0)	0 (0, 0)	0 (0, 0)	0 (0, 0)	0 (0, 0)	0 (0, 0)	0 (0, 0)	4 (3, 4)	4 (4, 5)	3 (3, 3)	11 (9, 12)	10 (8, 11)	11 (9, 12)	8 (6, 8)	28 (24, 31)
Tongliao	Inner Mongolia	Northeast	Male	50 y～	6 (5, 6)	6 (5, 7)	4 (4, 5)	16 (14, 18)	0 (0, 0)	0 (0, 0)	0 (0, 0)	1 (1, 1)	1 (1, 2)	1 (1, 1)	1 (1, 1)	3 (2, 4)	0 (0, 0)	0 (0, 0)	0 (0, 0)	1 (0, 1)	0 (0, 0)	0 (0, 0)	0 (0, 0)	0 (0, 0)	4 (4, 5)	5 (4, 6)	4 (3, 4)	13 (11, 15)	12 (10, 13)	13 (11, 15)	9 (8, 10)	34 (29, 38)
Tongliao	Inner Mongolia	Northeast	Male	55 y～	9 (8, 10)	10 (8, 11)	7 (6, 8)	26 (22, 29)	1 (1, 1)	1 (1, 1)	1 (0, 1)	2 (2, 2)	3 (2, 3)	3 (2, 3)	2 (1, 2)	7 (6, 9)	0 (0, 0)	0 (0, 0)	0 (0, 0)	1 (1, 1)	0 (0, 0)	0 (0, 0)	0 (0, 0)	1 (1, 1)	7 (6, 8)	8 (7, 9)	6 (5, 7)	21 (18, 24)	21 (17, 23)	22 (19, 25)	16 (13, 18)	58 (49, 66)
Tongliao	Inner Mongolia	Northeast	Male	60 y～	7 (6, 7)	8 (6, 9)	5 (4, 5)	19 (16, 21)	1 (1, 1)	1 (1, 1)	1 (1, 1)	3 (2, 3)	3 (2, 4)	3 (2, 3)	2 (1, 2)	8 (6, 10)	0 (0, 0)	0 (0, 0)	0 (0, 0)	1 (1, 1)	0 (0, 0)	0 (0, 0)	0 (0, 0)	1 (1, 1)	6 (5, 7)	7 (6, 8)	5 (4, 5)	18 (16, 21)	18 (15, 20)	20 (16, 22)	13 (11, 15)	50 (42, 57)
Tongliao	Inner Mongolia	Northeast	Male	65 y～	7 (6, 7)	8 (7, 9)	5 (4, 6)	19 (16, 22)	2 (1, 2)	2 (1, 2)	1 (1, 1)	4 (4, 5)	3 (3, 4)	3 (2, 4)	2 (2, 3)	9 (7, 11)	1 (0, 1)	0 (0, 1)	0 (0, 0)	1 (1, 2)	0 (0, 0)	0 (0, 0)	0 (0, 0)	1 (1, 1)	7 (6, 8)	8 (7, 9)	5 (4, 6)	20 (17, 23)	19 (16, 22)	21 (18, 24)	14 (12, 16)	54 (45, 63)
Tongliao	Inner Mongolia	Northeast	Male	70 y～	9 (7, 10)	10 (8, 12)	7 (5, 8)	26 (21, 29)	4 (3, 4)	3 (3, 4)	2 (2, 3)	9 (8, 10)	4 (3, 5)	4 (3, 5)	3 (2, 3)	11 (8, 13)	1 (1, 1)	1 (1, 1)	1 (0, 1)	2 (2, 3)	0 (0, 1)	0 (0, 0)	0 (0, 0)	1 (1, 1)	10 (8, 11)	11 (10, 13)	7 (6, 8)	28 (24, 32)	27 (23, 32)	30 (25, 35)	20 (16, 23)	77 (63, 89)
Tongliao	Inner Mongolia	Northeast	Male	75 y～	9 (8, 11)	11 (9, 13)	7 (6, 8)	28 (22, 32)	5 (4, 6)	5 (4, 5)	3 (3, 4)	13 (11, 15)	4 (3, 5)	3 (3, 4)	2 (2, 3)	10 (7, 12)	1 (1, 2)	1 (1, 1)	1 (1, 1)	3 (2, 4)	1 (0, 1)	0 (0, 1)	0 (0, 0)	1 (1, 2)	10 (9, 11)	12 (10, 13)	8 (6, 8)	29 (25, 33)	30 (25, 35)	33 (27, 38)	21 (18, 25)	84 (69, 97)
Tongliao	Inner Mongolia	Northeast	Male	80 y～	7 (6, 8)	9 (7, 10)	5 (4, 6)	21 (17, 24)	4 (4, 5)	5 (4, 6)	3 (2, 3)	12 (10, 14)	2 (1, 2)	2 (2, 3)	1 (1, 2)	5 (4, 6)	1 (1, 2)	1 (1, 2)	1 (1, 1)	4 (3, 4)	0 (0, 0)	0 (0, 0)	0 (0, 0)	1 (1, 1)	7 (6, 8)	8 (7, 9)	5 (4, 5)	20 (17, 22)	21 (17, 24)	26 (21, 30)	15 (13, 18)	62 (51, 72)
Tongliao	Inner Mongolia	Northeast	Male	85 y～	6 (5, 7)	8 (6, 9)	5 (4, 5)	19 (15, 22)	4 (4, 5)	5 (4, 6)	3 (3, 4)	12 (11, 14)	1 (1, 1)	1 (1, 2)	1 (1, 1)	3 (2, 4)	2 (1, 2)	2 (2, 3)	1 (1, 2)	6 (4, 7)	0 (0, 0)	0 (0, 0)	0 (0, 0)	1 (1, 1)	5 (4, 5)	6 (5, 6)	3 (3, 4)	14 (11, 15)	19 (15, 22)	22 (18, 26)	13 (11, 16)	54 (44, 63)
Tongliao	Inner Mongolia	Northeast	Female	0 y～	0 (0, 0)	0 (0, 0)	0 (0, 0)	0 (0, 0)	0 (0, 0)	0 (0, 0)	0 (0, 0)	0 (0, 0)	0 (0, 0)	0 (0, 0)	0 (0, 0)	0 (0, 0)	0 (0, 0)	0 (0, 0)	0 (0, 0)	0 (0, 0)	0 (0, 0)	0 (0, 0)	0 (0, 0)	0 (0, 0)	0 (0, 0)	0 (0, 0)	0 (0, 0)	0 (0, 0)	0 (0, 0)	0 (0, 0)	0 (0, 0)	0 (0, 0)
Tongliao	Inner Mongolia	Northeast	Female	1 y～	0 (0, 0)	0 (0, 0)	0 (0, 0)	0 (0, 0)	0 (0, 0)	0 (0, 0)	0 (0, 0)	0 (0, 0)	0 (0, 0)	0 (0, 0)	0 (0, 0)	0 (0, 0)	0 (0, 0)	0 (0, 0)	0 (0, 0)	0 (0, 0)	0 (0, 0)	0 (0, 0)	0 (0, 0)	0 (0, 0)	0 (0, 0)	0 (0, 0)	0 (0, 0)	0 (0, 0)	0 (0, 0)	0 (0, 0)	0 (0, 0)	0 (0, 0)
Tongliao	Inner Mongolia	Northeast	Female	5 y～	0 (0, 0)	0 (0, 0)	0 (0, 0)	0 (0, 0)	0 (0, 0)	0 (0, 0)	0 (0, 0)	0 (0, 0)	0 (0, 0)	0 (0, 0)	0 (0, 0)	0 (0, 0)	0 (0, 0)	0 (0, 0)	0 (0, 0)	0 (0, 0)	0 (0, 0)	0 (0, 0)	0 (0, 0)	0 (0, 0)	0 (0, 0)	0 (0, 0)	0 (0, 0)	0 (0, 0)	0 (0, 0)	0 (0, 0)	0 (0, 0)	0 (0, 0)
Tongliao	Inner Mongolia	Northeast	Female	10 y～	0 (0, 0)	0 (0, 0)	0 (0, 0)	0 (0, 0)	0 (0, 0)	0 (0, 0)	0 (0, 0)	0 (0, 0)	0 (0, 0)	0 (0, 0)	0 (0, 0)	0 (0, 0)	0 (0, 0)	0 (0, 0)	0 (0, 0)	0 (0, 0)	0 (0, 0)	0 (0, 0)	0 (0, 0)	0 (0, 0)	0 (0, 0)	0 (0, 0)	0 (0, 0)	0 (0, 0)	0 (0, 0)	0 (0, 0)	0 (0, 0)	0 (0, 0)
Tongliao	Inner Mongolia	Northeast	Female	15 y～	0 (0, 0)	0 (0, 0)	0 (0, 0)	0 (0, 0)	0 (0, 0)	0 (0, 0)	0 (0, 0)	0 (0, 0)	0 (0, 0)	0 (0, 0)	0 (0, 0)	0 (0, 0)	0 (0, 0)	0 (0, 0)	0 (0, 0)	0 (0, 0)	0 (0, 0)	0 (0, 0)	0 (0, 0)	0 (0, 0)	0 (0, 0)	0 (0, 0)	0 (0, 0)	0 (0, 0)	0 (0, 0)	0 (0, 0)	0 (0, 0)	0 (0, 0)
Tongliao	Inner Mongolia	Northeast	Female	20 y～	0 (0, 0)	0 (0, 0)	0 (0, 0)	0 (0, 0)	0 (0, 0)	0 (0, 0)	0 (0, 0)	0 (0, 0)	0 (0, 0)	0 (0, 0)	0 (0, 0)	0 (0, 0)	0 (0, 0)	0 (0, 0)	0 (0, 0)	0 (0, 0)	0 (0, 0)	0 (0, 0)	0 (0, 0)	0 (0, 0)	0 (0, 0)	0 (0, 0)	0 (0, 0)	0 (0, 0)	0 (0, 0)	0 (0, 0)	0 (0, 0)	0 (0, 0)
Tongliao	Inner Mongolia	Northeast	Female	25 y～	0 (0, 0)	0 (0, 0)	0 (0, 0)	0 (0, 0)	0 (0, 0)	0 (0, 0)	0 (0, 0)	0 (0, 0)	0 (0, 0)	0 (0, 0)	0 (0, 0)	0 (0, 0)	0 (0, 0)	0 (0, 0)	0 (0, 0)	0 (0, 0)	0 (0, 0)	0 (0, 0)	0 (0, 0)	0 (0, 0)	0 (0, 0)	0 (0, 0)	0 (0, 0)	0 (0, 0)	0 (0, 0)	0 (0, 0)	0 (0, 0)	1 (1, 1)
Tongliao	Inner Mongolia	Northeast	Female	30 y～	0 (0, 0)	0 (0, 0)	0 (0, 0)	0 (0, 1)	0 (0, 0)	0 (0, 0)	0 (0, 0)	0 (0, 0)	0 (0, 0)	0 (0, 0)	0 (0, 0)	0 (0, 0)	0 (0, 0)	0 (0, 0)	0 (0, 0)	0 (0, 0)	0 (0, 0)	0 (0, 0)	0 (0, 0)	0 (0, 0)	0 (0, 0)	0 (0, 0)	0 (0, 0)	1 (1, 1)	0 (0, 0)	1 (1, 1)	0 (0, 0)	1 (1, 1)
Tongliao	Inner Mongolia	Northeast	Female	35 y～	0 (0, 0)	1 (1, 1)	0 (0, 0)	1 (1, 2)	0 (0, 0)	0 (0, 0)	0 (0, 0)	0 (0, 0)	0 (0, 0)	0 (0, 0)	0 (0, 0)	0 (0, 0)	0 (0, 0)	0 (0, 0)	0 (0, 0)	0 (0, 0)	0 (0, 0)	0 (0, 0)	0 (0, 0)	0 (0, 0)	0 (0, 0)	0 (0, 0)	0 (0, 0)	1 (1, 1)	1 (1, 1)	1 (1, 2)	0 (0, 0)	3 (2, 3)
Tongliao	Inner Mongolia	Northeast	Female	40 y～	1 (1, 1)	1 (1, 1)	0 (0, 0)	2 (2, 3)	0 (0, 0)	0 (0, 0)	0 (0, 0)	0 (0, 0)	0 (0, 0)	0 (0, 0)	0 (0, 0)	0 (0, 1)	0 (0, 0)	0 (0, 0)	0 (0, 0)	0 (0, 0)	0 (0, 0)	0 (0, 0)	0 (0, 0)	0 (0, 0)	1 (1, 1)	1 (1, 1)	0 (0, 0)	2 (2, 2)	1 (1, 2)	3 (2, 3)	1 (1, 1)	5 (4, 5)
Tongliao	Inner Mongolia	Northeast	Female	45 y～	1 (1, 1)	2 (1, 2)	1 (0, 1)	3 (3, 4)	0 (0, 0)	0 (0, 0)	0 (0, 0)	0 (0, 0)	0 (0, 0)	1 (0, 1)	0 (0, 0)	1 (1, 1)	0 (0, 0)	0 (0, 0)	0 (0, 0)	0 (0, 0)	0 (0, 0)	0 (0, 0)	0 (0, 0)	0 (0, 0)	1 (1, 1)	2 (1, 2)	0 (0, 1)	3 (3, 3)	2 (2, 3)	4 (4, 5)	1 (1, 1)	8 (7, 9)
Tongliao	Inner Mongolia	Northeast	Female	50 y～	1 (1, 2)	2 (2, 3)	1 (1, 1)	5 (4, 5)	0 (0, 0)	0 (0, 0)	0 (0, 0)	0 (0, 0)	0 (0, 0)	1 (1, 1)	0 (0, 0)	1 (1, 2)	0 (0, 0)	0 (0, 0)	0 (0, 0)	0 (0, 0)	0 (0, 0)	0 (0, 0)	0 (0, 0)	0 (0, 0)	1 (1, 2)	2 (2, 3)	1 (1, 1)	4 (4, 5)	3 (3, 4)	6 (5, 7)	2 (1, 2)	11 (9, 12)
Tongliao	Inner Mongolia	Northeast	Female	55 y～	2 (2, 3)	4 (4, 5)	1 (1, 1)	8 (7, 9)	0 (0, 0)	0 (0, 0)	0 (0, 0)	1 (1, 1)	1 (0, 1)	2 (1, 2)	0 (0, 0)	3 (2, 3)	0 (0, 0)	0 (0, 0)	0 (0, 0)	0 (0, 1)	0 (0, 0)	0 (0, 0)	0 (0, 0)	0 (0, 0)	2 (2, 2)	3 (3, 4)	1 (1, 1)	6 (5, 7)	5 (4, 6)	10 (8, 11)	3 (2, 3)	18 (15, 20)
Tongliao	Inner Mongolia	Northeast	Female	60 y～	2 (2, 3)	4 (3, 5)	1 (1, 1)	8 (6, 9)	0 (0, 0)	1 (0, 1)	0 (0, 0)	1 (1, 1)	1 (0, 1)	1 (1, 2)	0 (0, 0)	2 (2, 3)	0 (0, 0)	0 (0, 0)	0 (0, 0)	0 (0, 0)	0 (0, 0)	0 (0, 0)	0 (0, 0)	0 (0, 1)	2 (2, 2)	4 (3, 4)	1 (1, 1)	7 (6, 8)	6 (5, 6)	10 (8, 12)	3 (3, 3)	19 (16, 21)
Tongliao	Inner Mongolia	Northeast	Female	65 y～	3 (3, 4)	6 (5, 7)	2 (2, 2)	11 (9, 12)	0 (0, 0)	1 (1, 1)	0 (0, 0)	2 (1, 2)	1 (1, 1)	2 (1, 2)	0 (0, 1)	3 (2, 4)	0 (0, 0)	0 (0, 1)	0 (0, 0)	1 (1, 1)	0 (0, 0)	0 (0, 0)	0 (0, 0)	1 (1, 1)	3 (3, 3)	5 (4, 6)	2 (1, 2)	10 (8, 11)	8 (7, 9)	15 (12, 17)	4 (4, 5)	27 (23, 31)
Tongliao	Inner Mongolia	Northeast	Female	70 y～	5 (4, 6)	9 (7, 10)	3 (2, 3)	17 (14, 20)	1 (1, 1)	2 (2, 2)	1 (0, 1)	3 (3, 4)	1 (1, 1)	2 (2, 3)	1 (0, 1)	4 (3, 5)	0 (0, 0)	1 (1, 1)	0 (0, 0)	1 (1, 1)	0 (0, 0)	1 (1, 1)	0 (0, 0)	1 (1, 1)	5 (4, 5)	8 (7, 9)	3 (2, 3)	16 (13, 17)	12 (10, 14)	23 (19, 26)	7 (6, 8)	42 (35, 48)
Tongliao	Inner Mongolia	Northeast	Female	75 y～	7 (5, 8)	11 (9, 13)	4 (3, 4)	22 (18, 25)	1 (1, 2)	3 (3, 3)	1 (1, 1)	5 (4, 6)	1 (1, 1)	2 (2, 3)	1 (0, 1)	4 (3, 5)	1 (0, 1)	1 (1, 1)	0 (0, 0)	2 (2, 2)	0 (0, 0)	1 (1, 1)	0 (0, 0)	1 (1, 2)	6 (5, 7)	10 (9, 12)	3 (3, 4)	20 (17, 22)	16 (13, 18)	29 (24, 34)	9 (7, 10)	54 (44, 62)
Tongliao	Inner Mongolia	Northeast	Female	80 y～	6 (4, 6)	10 (8, 11)	3 (2, 3)	18 (15, 21)	2 (1, 2)	3 (2, 3)	1 (1, 1)	5 (4, 6)	1 (1, 1)	1 (1, 2)	0 (0, 1)	2 (2, 3)	1 (0, 1)	1 (1, 1)	0 (0, 0)	2 (2, 3)	0 (0, 0)	0 (0, 1)	0 (0, 0)	1 (1, 1)	4 (4, 5)	8 (7, 9)	2 (2, 3)	14 (12, 16)	13 (11, 15)	23 (19, 27)	7 (6, 8)	43 (35, 51)
Tongliao	Inner Mongolia	Northeast	Female	85 y～	6 (5, 7)	11 (9, 13)	3 (3, 4)	21 (17, 24)	2 (2, 3)	4 (4, 5)	1 (1, 2)	8 (7, 9)	0 (0, 1)	1 (1, 1)	0 (0, 0)	2 (1, 2)	1 (1, 2)	2 (2, 3)	1 (1, 1)	4 (3, 5)	0 (0, 0)	0 (0, 0)	0 (0, 0)	1 (1, 1)	4 (3, 4)	7 (6, 8)	2 (2, 2)	13 (11, 15)	15 (12, 17)	26 (21, 30)	8 (6, 9)	48 (39, 56)
Wuhai	Inner Mongolia	Northeast	Male	0 y～	0 (0, 0)	0 (0, 0)	0 (0, 0)	0 (0, 0)	0 (0, 0)	0 (0, 0)	0 (0, 0)	0 (0, 0)	0 (0, 0)	0 (0, 0)	0 (0, 0)	0 (0, 0)	0 (0, 0)	0 (0, 0)	0 (0, 0)	0 (0, 0)	0 (0, 0)	0 (0, 0)	0 (0, 0)	0 (0, 0)	0 (0, 0)	0 (0, 0)	0 (0, 0)	0 (0, 0)	0 (0, 0)	0 (0, 0)	0 (0, 0)	0 (0, 0)
Wuhai	Inner Mongolia	Northeast	Male	1 y～	0 (0, 0)	0 (0, 0)	0 (0, 0)	0 (0, 0)	0 (0, 0)	0 (0, 0)	0 (0, 0)	0 (0, 0)	0 (0, 0)	0 (0, 0)	0 (0, 0)	0 (0, 0)	0 (0, 0)	0 (0, 0)	0 (0, 0)	0 (0, 0)	0 (0, 0)	0 (0, 0)	0 (0, 0)	0 (0, 0)	0 (0, 0)	0 (0, 0)	0 (0, 0)	0 (0, 0)	0 (0, 0)	0 (0, 0)	0 (0, 0)	0 (0, 0)
Wuhai	Inner Mongolia	Northeast	Male	5 y～	0 (0, 0)	0 (0, 0)	0 (0, 0)	0 (0, 0)	0 (0, 0)	0 (0, 0)	0 (0, 0)	0 (0, 0)	0 (0, 0)	0 (0, 0)	0 (0, 0)	0 (0, 0)	0 (0, 0)	0 (0, 0)	0 (0, 0)	0 (0, 0)	0 (0, 0)	0 (0, 0)	0 (0, 0)	0 (0, 0)	0 (0, 0)	0 (0, 0)	0 (0, 0)	0 (0, 0)	0 (0, 0)	0 (0, 0)	0 (0, 0)	0 (0, 0)
Wuhai	Inner Mongolia	Northeast	Male	10 y～	0 (0, 0)	0 (0, 0)	0 (0, 0)	0 (0, 0)	0 (0, 0)	0 (0, 0)	0 (0, 0)	0 (0, 0)	0 (0, 0)	0 (0, 0)	0 (0, 0)	0 (0, 0)	0 (0, 0)	0 (0, 0)	0 (0, 0)	0 (0, 0)	0 (0, 0)	0 (0, 0)	0 (0, 0)	0 (0, 0)	0 (0, 0)	0 (0, 0)	0 (0, 0)	0 (0, 0)	0 (0, 0)	0 (0, 0)	0 (0, 0)	0 (0, 0)
Wuhai	Inner Mongolia	Northeast	Male	15 y～	0 (0, 0)	0 (0, 0)	0 (0, 0)	0 (0, 0)	0 (0, 0)	0 (0, 0)	0 (0, 0)	0 (0, 0)	0 (0, 0)	0 (0, 0)	0 (0, 0)	0 (0, 0)	0 (0, 0)	0 (0, 0)	0 (0, 0)	0 (0, 0)	0 (0, 0)	0 (0, 0)	0 (0, 0)	0 (0, 0)	0 (0, 0)	0 (0, 0)	0 (0, 0)	0 (0, 0)	0 (0, 0)	0 (0, 0)	0 (0, 0)	0 (0, 0)
Wuhai	Inner Mongolia	Northeast	Male	20 y～	0 (0, 0)	0 (0, 0)	0 (0, 0)	0 (0, 0)	0 (0, 0)	0 (0, 0)	0 (0, 0)	0 (0, 0)	0 (0, 0)	0 (0, 0)	0 (0, 0)	0 (0, 0)	0 (0, 0)	0 (0, 0)	0 (0, 0)	0 (0, 0)	0 (0, 0)	0 (0, 0)	0 (0, 0)	0 (0, 0)	0 (0, 0)	0 (0, 0)	0 (0, 0)	0 (0, 0)	0 (0, 0)	0 (0, 0)	0 (0, 0)	1 (1, 1)
Wuhai	Inner Mongolia	Northeast	Male	25 y～	0 (0, 0)	0 (0, 0)	0 (0, 0)	0 (0, 0)	0 (0, 0)	0 (0, 0)	0 (0, 0)	0 (0, 0)	0 (0, 0)	0 (0, 0)	0 (0, 0)	0 (0, 0)	0 (0, 0)	0 (0, 0)	0 (0, 0)	0 (0, 0)	0 (0, 0)	0 (0, 0)	0 (0, 0)	0 (0, 0)	0 (0, 0)	0 (0, 0)	0 (0, 0)	0 (0, 0)	0 (0, 0)	0 (0, 0)	0 (0, 0)	1 (1, 1)
Wuhai	Inner Mongolia	Northeast	Male	30 y～	0 (0, 1)	1 (1, 1)	0 (0, 0)	1 (1, 2)	0 (0, 0)	0 (0, 0)	0 (0, 0)	0 (0, 0)	0 (0, 0)	0 (0, 0)	0 (0, 0)	0 (0, 0)	0 (0, 0)	0 (0, 0)	0 (0, 0)	0 (0, 0)	0 (0, 0)	0 (0, 0)	0 (0, 0)	0 (0, 0)	0 (0, 0)	0 (0, 0)	0 (0, 0)	1 (1, 1)	1 (1, 1)	1 (1, 1)	1 (0, 1)	2 (2, 3)
Wuhai	Inner Mongolia	Northeast	Male	35 y～	1 (1, 1)	1 (1, 2)	1 (1, 1)	3 (3, 3)	0 (0, 0)	0 (0, 0)	0 (0, 0)	0 (0, 0)	0 (0, 0)	0 (0, 0)	0 (0, 0)	0 (0, 0)	0 (0, 0)	0 (0, 0)	0 (0, 0)	0 (0, 0)	0 (0, 0)	0 (0, 0)	0 (0, 0)	0 (0, 0)	1 (1, 1)	1 (1, 1)	0 (0, 0)	2 (2, 2)	2 (1, 2)	2 (2, 3)	1 (1, 1)	5 (4, 6)
Wuhai	Inner Mongolia	Northeast	Male	40 y～	2 (2, 2)	3 (2, 3)	1 (1, 1)	6 (5, 6)	0 (0, 0)	0 (0, 0)	0 (0, 0)	0 (0, 0)	0 (0, 0)	0 (0, 0)	0 (0, 0)	0 (0, 1)	0 (0, 0)	0 (0, 0)	0 (0, 0)	0 (0, 0)	0 (0, 0)	0 (0, 0)	0 (0, 0)	0 (0, 0)	1 (1, 1)	2 (1, 2)	1 (1, 1)	4 (3, 4)	3 (3, 4)	5 (4, 5)	2 (2, 2)	10 (9, 12)
Wuhai	Inner Mongolia	Northeast	Male	45 y～	2 (2, 3)	3 (3, 3)	2 (1, 2)	7 (6, 8)	0 (0, 0)	0 (0, 0)	0 (0, 0)	0 (0, 0)	0 (0, 0)	0 (0, 0)	0 (0, 0)	1 (1, 1)	0 (0, 0)	0 (0, 0)	0 (0, 0)	0 (0, 0)	0 (0, 0)	0 (0, 0)	0 (0, 0)	0 (0, 0)	2 (2, 2)	2 (2, 3)	1 (1, 1)	6 (5, 6)	5 (4, 6)	6 (5, 7)	3 (3, 4)	14 (12, 16)
Wuhai	Inner Mongolia	Northeast	Male	50 y～	3 (2, 3)	4 (3, 4)	2 (2, 2)	8 (7, 9)	0 (0, 0)	0 (0, 0)	0 (0, 0)	0 (0, 0)	1 (0, 1)	1 (0, 1)	0 (0, 1)	2 (1, 2)	0 (0, 0)	0 (0, 0)	0 (0, 0)	0 (0, 0)	0 (0, 0)	0 (0, 0)	0 (0, 0)	0 (0, 0)	2 (2, 3)	3 (2, 3)	2 (1, 2)	7 (6, 7)	6 (5, 7)	7 (6, 8)	4 (4, 5)	17 (15, 20)
Wuhai	Inner Mongolia	Northeast	Male	55 y～	5 (4, 5)	6 (5, 6)	3 (3, 4)	13 (11, 15)	0 (0, 0)	0 (0, 0)	0 (0, 0)	1 (1, 1)	1 (1, 2)	1 (1, 2)	1 (1, 1)	4 (3, 5)	0 (0, 0)	0 (0, 0)	0 (0, 0)	0 (0, 1)	0 (0, 0)	0 (0, 0)	0 (0, 0)	0 (0, 1)	4 (3, 4)	5 (4, 5)	3 (2, 3)	11 (9, 12)	10 (9, 12)	12 (10, 14)	7 (6, 8)	30 (25, 34)
Wuhai	Inner Mongolia	Northeast	Male	60 y～	3 (3, 4)	4 (4, 5)	2 (2, 2)	10 (8, 11)	1 (0, 1)	1 (0, 1)	0 (0, 0)	1 (1, 2)	2 (1, 2)	2 (1, 2)	1 (1, 1)	4 (3, 5)	0 (0, 0)	0 (0, 0)	0 (0, 0)	0 (0, 1)	0 (0, 0)	0 (0, 0)	0 (0, 0)	0 (0, 0)	3 (3, 4)	4 (4, 5)	2 (2, 2)	9 (8, 11)	9 (7, 10)	11 (9, 13)	6 (5, 7)	26 (21, 29)
Wuhai	Inner Mongolia	Northeast	Male	65 y～	3 (3, 4)	4 (4, 5)	2 (2, 2)	10 (8, 11)	1 (1, 1)	1 (1, 1)	0 (0, 1)	2 (2, 2)	2 (1, 2)	2 (1, 2)	1 (1, 1)	4 (3, 5)	0 (0, 0)	0 (0, 0)	0 (0, 0)	1 (1, 1)	0 (0, 0)	0 (0, 0)	0 (0, 0)	0 (0, 0)	3 (3, 4)	4 (4, 5)	2 (2, 3)	10 (9, 12)	10 (8, 11)	12 (10, 14)	6 (5, 7)	28 (23, 32)
Wuhai	Inner Mongolia	Northeast	Male	70 y～	4 (4, 5)	6 (5, 7)	3 (2, 3)	13 (11, 15)	2 (1, 2)	2 (1, 2)	1 (1, 1)	5 (4, 5)	2 (2, 3)	2 (2, 3)	1 (1, 2)	6 (4, 7)	0 (0, 1)	0 (0, 1)	0 (0, 0)	1 (1, 1)	0 (0, 0)	0 (0, 0)	0 (0, 0)	1 (1, 1)	5 (4, 5)	6 (5, 7)	3 (3, 4)	14 (12, 16)	14 (11, 16)	17 (14, 19)	9 (7, 10)	39 (32, 46)
Wuhai	Inner Mongolia	Northeast	Male	75 y～	5 (4, 5)	6 (5, 7)	3 (3, 4)	14 (11, 16)	3 (2, 3)	3 (2, 3)	1 (1, 2)	6 (5, 8)	2 (1, 2)	2 (1, 2)	1 (1, 1)	5 (4, 6)	1 (0, 1)	1 (0, 1)	0 (0, 0)	2 (1, 2)	0 (0, 0)	0 (0, 0)	0 (0, 0)	1 (1, 1)	5 (4, 6)	7 (6, 7)	3 (3, 4)	15 (13, 17)	15 (12, 17)	18 (15, 21)	10 (8, 11)	43 (35, 50)
Wuhai	Inner Mongolia	Northeast	Male	80 y～	3 (3, 4)	5 (4, 6)	2 (2, 3)	10 (8, 12)	2 (2, 2)	3 (2, 3)	1 (1, 2)	6 (5, 7)	1 (1, 1)	1 (1, 1)	1 (0, 1)	3 (2, 3)	1 (0, 1)	1 (1, 1)	0 (0, 0)	2 (1, 2)	0 (0, 0)	0 (0, 0)	0 (0, 0)	0 (0, 1)	3 (3, 4)	5 (4, 5)	2 (2, 2)	10 (9, 11)	11 (9, 12)	14 (12, 16)	7 (6, 8)	31 (26, 37)
Wuhai	Inner Mongolia	Northeast	Male	85 y～	3 (3, 4)	4 (4, 5)	2 (2, 2)	10 (8, 11)	2 (2, 2)	3 (2, 3)	1 (1, 2)	6 (5, 7)	1 (0, 1)	1 (1, 1)	0 (0, 0)	2 (1, 2)	1 (1, 1)	1 (1, 2)	1 (0, 1)	3 (2, 4)	0 (0, 0)	0 (0, 0)	0 (0, 0)	0 (0, 0)	2 (2, 3)	3 (3, 4)	1 (1, 2)	7 (6, 8)	9 (8, 11)	12 (10, 15)	6 (5, 7)	28 (22, 32)
Wuhai	Inner Mongolia	Northeast	Female	0 y～	0 (0, 0)	0 (0, 0)	0 (0, 0)	0 (0, 0)	0 (0, 0)	0 (0, 0)	0 (0, 0)	0 (0, 0)	0 (0, 0)	0 (0, 0)	0 (0, 0)	0 (0, 0)	0 (0, 0)	0 (0, 0)	0 (0, 0)	0 (0, 0)	0 (0, 0)	0 (0, 0)	0 (0, 0)	0 (0, 0)	0 (0, 0)	0 (0, 0)	0 (0, 0)	0 (0, 0)	0 (0, 0)	0 (0, 0)	0 (0, 0)	0 (0, 0)
Wuhai	Inner Mongolia	Northeast	Female	1 y～	0 (0, 0)	0 (0, 0)	0 (0, 0)	0 (0, 0)	0 (0, 0)	0 (0, 0)	0 (0, 0)	0 (0, 0)	0 (0, 0)	0 (0, 0)	0 (0, 0)	0 (0, 0)	0 (0, 0)	0 (0, 0)	0 (0, 0)	0 (0, 0)	0 (0, 0)	0 (0, 0)	0 (0, 0)	0 (0, 0)	0 (0, 0)	0 (0, 0)	0 (0, 0)	0 (0, 0)	0 (0, 0)	0 (0, 0)	0 (0, 0)	0 (0, 0)
Wuhai	Inner Mongolia	Northeast	Female	5 y～	0 (0, 0)	0 (0, 0)	0 (0, 0)	0 (0, 0)	0 (0, 0)	0 (0, 0)	0 (0, 0)	0 (0, 0)	0 (0, 0)	0 (0, 0)	0 (0, 0)	0 (0, 0)	0 (0, 0)	0 (0, 0)	0 (0, 0)	0 (0, 0)	0 (0, 0)	0 (0, 0)	0 (0, 0)	0 (0, 0)	0 (0, 0)	0 (0, 0)	0 (0, 0)	0 (0, 0)	0 (0, 0)	0 (0, 0)	0 (0, 0)	0 (0, 0)
Wuhai	Inner Mongolia	Northeast	Female	10 y～	0 (0, 0)	0 (0, 0)	0 (0, 0)	0 (0, 0)	0 (0, 0)	0 (0, 0)	0 (0, 0)	0 (0, 0)	0 (0, 0)	0 (0, 0)	0 (0, 0)	0 (0, 0)	0 (0, 0)	0 (0, 0)	0 (0, 0)	0 (0, 0)	0 (0, 0)	0 (0, 0)	0 (0, 0)	0 (0, 0)	0 (0, 0)	0 (0, 0)	0 (0, 0)	0 (0, 0)	0 (0, 0)	0 (0, 0)	0 (0, 0)	0 (0, 0)
Wuhai	Inner Mongolia	Northeast	Female	15 y～	0 (0, 0)	0 (0, 0)	0 (0, 0)	0 (0, 0)	0 (0, 0)	0 (0, 0)	0 (0, 0)	0 (0, 0)	0 (0, 0)	0 (0, 0)	0 (0, 0)	0 (0, 0)	0 (0, 0)	0 (0, 0)	0 (0, 0)	0 (0, 0)	0 (0, 0)	0 (0, 0)	0 (0, 0)	0 (0, 0)	0 (0, 0)	0 (0, 0)	0 (0, 0)	0 (0, 0)	0 (0, 0)	0 (0, 0)	0 (0, 0)	0 (0, 0)
Wuhai	Inner Mongolia	Northeast	Female	20 y～	0 (0, 0)	0 (0, 0)	0 (0, 0)	0 (0, 0)	0 (0, 0)	0 (0, 0)	0 (0, 0)	0 (0, 0)	0 (0, 0)	0 (0, 0)	0 (0, 0)	0 (0, 0)	0 (0, 0)	0 (0, 0)	0 (0, 0)	0 (0, 0)	0 (0, 0)	0 (0, 0)	0 (0, 0)	0 (0, 0)	0 (0, 0)	0 (0, 0)	0 (0, 0)	0 (0, 0)	0 (0, 0)	0 (0, 0)	0 (0, 0)	0 (0, 0)
Wuhai	Inner Mongolia	Northeast	Female	25 y～	0 (0, 0)	0 (0, 0)	0 (0, 0)	0 (0, 0)	0 (0, 0)	0 (0, 0)	0 (0, 0)	0 (0, 0)	0 (0, 0)	0 (0, 0)	0 (0, 0)	0 (0, 0)	0 (0, 0)	0 (0, 0)	0 (0, 0)	0 (0, 0)	0 (0, 0)	0 (0, 0)	0 (0, 0)	0 (0, 0)	0 (0, 0)	0 (0, 0)	0 (0, 0)	0 (0, 0)	0 (0, 0)	0 (0, 0)	0 (0, 0)	0 (0, 0)
Wuhai	Inner Mongolia	Northeast	Female	30 y～	0 (0, 0)	0 (0, 0)	0 (0, 0)	0 (0, 0)	0 (0, 0)	0 (0, 0)	0 (0, 0)	0 (0, 0)	0 (0, 0)	0 (0, 0)	0 (0, 0)	0 (0, 0)	0 (0, 0)	0 (0, 0)	0 (0, 0)	0 (0, 0)	0 (0, 0)	0 (0, 0)	0 (0, 0)	0 (0, 0)	0 (0, 0)	0 (0, 0)	0 (0, 0)	0 (0, 0)	0 (0, 0)	0 (0, 0)	0 (0, 0)	1 (1, 1)
Wuhai	Inner Mongolia	Northeast	Female	35 y～	0 (0, 0)	0 (0, 0)	0 (0, 0)	1 (1, 1)	0 (0, 0)	0 (0, 0)	0 (0, 0)	0 (0, 0)	0 (0, 0)	0 (0, 0)	0 (0, 0)	0 (0, 0)	0 (0, 0)	0 (0, 0)	0 (0, 0)	0 (0, 0)	0 (0, 0)	0 (0, 0)	0 (0, 0)	0 (0, 0)	0 (0, 0)	0 (0, 0)	0 (0, 0)	0 (0, 0)	0 (0, 0)	1 (1, 1)	0 (0, 0)	1 (1, 1)
Wuhai	Inner Mongolia	Northeast	Female	40 y～	0 (0, 0)	1 (1, 1)	0 (0, 0)	1 (1, 1)	0 (0, 0)	0 (0, 0)	0 (0, 0)	0 (0, 0)	0 (0, 0)	0 (0, 0)	0 (0, 0)	0 (0, 0)	0 (0, 0)	0 (0, 0)	0 (0, 0)	0 (0, 0)	0 (0, 0)	0 (0, 0)	0 (0, 0)	0 (0, 0)	0 (0, 0)	1 (0, 1)	0 (0, 0)	1 (1, 1)	1 (1, 1)	1 (1, 2)	0 (0, 0)	2 (2, 3)
Wuhai	Inner Mongolia	Northeast	Female	45 y～	0 (0, 1)	1 (1, 1)	0 (0, 0)	2 (1, 2)	0 (0, 0)	0 (0, 0)	0 (0, 0)	0 (0, 0)	0 (0, 0)	0 (0, 0)	0 (0, 0)	1 (0, 1)	0 (0, 0)	0 (0, 0)	0 (0, 0)	0 (0, 0)	0 (0, 0)	0 (0, 0)	0 (0, 0)	0 (0, 0)	0 (0, 1)	1 (1, 1)	0 (0, 0)	2 (1, 2)	1 (1, 1)	2 (2, 3)	1 (0, 1)	4 (3, 5)
Wuhai	Inner Mongolia	Northeast	Female	50 y～	1 (1, 1)	1 (1, 1)	0 (0, 0)	2 (2, 3)	0 (0, 0)	0 (0, 0)	0 (0, 0)	0 (0, 0)	0 (0, 0)	0 (0, 1)	0 (0, 0)	1 (1, 1)	0 (0, 0)	0 (0, 0)	0 (0, 0)	0 (0, 0)	0 (0, 0)	0 (0, 0)	0 (0, 0)	0 (0, 0)	1 (1, 1)	1 (1, 1)	0 (0, 0)	2 (2, 3)	2 (1, 2)	3 (3, 4)	1 (1, 1)	6 (5, 6)
Wuhai	Inner Mongolia	Northeast	Female	55 y～	1 (1, 1)	2 (2, 2)	1 (0, 1)	4 (3, 4)	0 (0, 0)	0 (0, 0)	0 (0, 0)	0 (0, 0)	0 (0, 0)	1 (1, 1)	0 (0, 0)	1 (1, 2)	0 (0, 0)	0 (0, 0)	0 (0, 0)	0 (0, 0)	0 (0, 0)	0 (0, 0)	0 (0, 0)	0 (0, 0)	1 (1, 1)	2 (2, 2)	0 (0, 0)	3 (3, 4)	3 (2, 3)	5 (4, 6)	1 (1, 1)	9 (8, 10)
Wuhai	Inner Mongolia	Northeast	Female	60 y～	1 (1, 1)	2 (2, 2)	1 (0, 1)	4 (3, 4)	0 (0, 0)	0 (0, 0)	0 (0, 0)	0 (0, 1)	0 (0, 0)	1 (1, 1)	0 (0, 0)	1 (1, 2)	0 (0, 0)	0 (0, 0)	0 (0, 0)	0 (0, 0)	0 (0, 0)	0 (0, 0)	0 (0, 0)	0 (0, 0)	1 (1, 1)	2 (2, 2)	0 (0, 1)	4 (3, 4)	3 (2, 3)	5 (5, 6)	1 (1, 2)	10 (8, 11)
Wuhai	Inner Mongolia	Northeast	Female	65 y～	2 (1, 2)	3 (3, 4)	1 (1, 1)	6 (5, 6)	0 (0, 0)	1 (0, 1)	0 (0, 0)	1 (1, 1)	0 (0, 1)	1 (1, 1)	0 (0, 0)	2 (1, 2)	0 (0, 0)	0 (0, 0)	0 (0, 0)	0 (0, 0)	0 (0, 0)	0 (0, 0)	0 (0, 0)	0 (0, 0)	2 (1, 2)	3 (2, 3)	1 (1, 1)	5 (4, 6)	4 (3, 5)	8 (7, 9)	2 (2, 2)	14 (12, 16)
Wuhai	Inner Mongolia	Northeast	Female	70 y～	3 (2, 3)	5 (4, 6)	1 (1, 1)	9 (7, 10)	0 (0, 0)	1 (1, 1)	0 (0, 0)	2 (1, 2)	1 (0, 1)	1 (1, 1)	0 (0, 0)	2 (1, 2)	0 (0, 0)	0 (0, 0)	0 (0, 0)	1 (0, 1)	0 (0, 0)	0 (0, 0)	0 (0, 0)	1 (0, 1)	2 (2, 3)	4 (4, 5)	1 (1, 1)	8 (7, 9)	6 (5, 7)	12 (10, 14)	3 (2, 3)	21 (18, 25)
Wuhai	Inner Mongolia	Northeast	Female	75 y～	3 (3, 4)	6 (5, 7)	2 (1, 2)	11 (9, 13)	1 (1, 1)	2 (1, 2)	0 (0, 0)	3 (2, 3)	1 (0, 1)	1 (1, 2)	0 (0, 0)	2 (2, 3)	0 (0, 0)	1 (0, 1)	0 (0, 0)	1 (1, 1)	0 (0, 0)	0 (0, 1)	0 (0, 0)	1 (1, 1)	3 (3, 3)	6 (5, 6)	1 (1, 2)	10 (9, 11)	8 (7, 9)	16 (13, 18)	4 (3, 4)	27 (23, 32)
Wuhai	Inner Mongolia	Northeast	Female	80 y～	3 (2, 3)	5 (4, 6)	1 (1, 1)	9 (7, 11)	1 (1, 1)	1 (1, 2)	0 (0, 1)	3 (2, 3)	0 (0, 0)	1 (1, 1)	0 (0, 0)	1 (1, 2)	0 (0, 0)	1 (0, 1)	0 (0, 0)	1 (1, 1)	0 (0, 0)	0 (0, 0)	0 (0, 0)	0 (0, 1)	2 (2, 2)	4 (3, 5)	1 (1, 1)	7 (6, 8)	7 (5, 8)	12 (10, 14)	3 (3, 4)	22 (18, 26)
Wuhai	Inner Mongolia	Northeast	Female	85 y～	3 (3, 4)	6 (5, 7)	1 (1, 2)	11 (8, 12)	1 (1, 1)	2 (2, 3)	1 (1, 1)	4 (3, 5)	0 (0, 0)	0 (0, 1)	0 (0, 0)	1 (1, 1)	1 (0, 1)	1 (1, 1)	0 (0, 0)	2 (2, 3)	0 (0, 0)	0 (0, 0)	0 (0, 0)	0 (0, 0)	2 (2, 2)	4 (3, 4)	1 (1, 1)	7 (6, 8)	7 (6, 9)	14 (11, 16)	3 (3, 4)	25 (20, 29)
Ulanqab	Inner Mongolia	Northeast	Male	0 y～	0 (0, 0)	0 (0, 0)	0 (0, 0)	0 (0, 0)	0 (0, 0)	0 (0, 0)	0 (0, 0)	0 (0, 0)	0 (0, 0)	0 (0, 0)	0 (0, 0)	0 (0, 0)	0 (0, 0)	0 (0, 0)	0 (0, 0)	0 (0, 0)	0 (0, 0)	0 (0, 0)	0 (0, 0)	0 (0, 0)	0 (0, 0)	0 (0, 0)	0 (0, 0)	0 (0, 0)	0 (0, 0)	0 (0, 0)	0 (0, 0)	0 (0, 0)
Ulanqab	Inner Mongolia	Northeast	Male	1 y～	0 (0, 0)	0 (0, 0)	0 (0, 0)	0 (0, 0)	0 (0, 0)	0 (0, 0)	0 (0, 0)	0 (0, 0)	0 (0, 0)	0 (0, 0)	0 (0, 0)	0 (0, 0)	0 (0, 0)	0 (0, 0)	0 (0, 0)	0 (0, 0)	0 (0, 0)	0 (0, 0)	0 (0, 0)	0 (0, 0)	0 (0, 0)	0 (0, 0)	0 (0, 0)	0 (0, 0)	0 (0, 0)	0 (0, 0)	0 (0, 0)	0 (0, 0)
Ulanqab	Inner Mongolia	Northeast	Male	5 y～	0 (0, 0)	0 (0, 0)	0 (0, 0)	0 (0, 0)	0 (0, 0)	0 (0, 0)	0 (0, 0)	0 (0, 0)	0 (0, 0)	0 (0, 0)	0 (0, 0)	0 (0, 0)	0 (0, 0)	0 (0, 0)	0 (0, 0)	0 (0, 0)	0 (0, 0)	0 (0, 0)	0 (0, 0)	0 (0, 0)	0 (0, 0)	0 (0, 0)	0 (0, 0)	0 (0, 0)	0 (0, 0)	0 (0, 0)	0 (0, 0)	0 (0, 0)
Ulanqab	Inner Mongolia	Northeast	Male	10 y～	0 (0, 0)	0 (0, 0)	0 (0, 0)	0 (0, 0)	0 (0, 0)	0 (0, 0)	0 (0, 0)	0 (0, 0)	0 (0, 0)	0 (0, 0)	0 (0, 0)	0 (0, 0)	0 (0, 0)	0 (0, 0)	0 (0, 0)	0 (0, 0)	0 (0, 0)	0 (0, 0)	0 (0, 0)	0 (0, 0)	0 (0, 0)	0 (0, 0)	0 (0, 0)	0 (0, 0)	0 (0, 0)	0 (0, 0)	0 (0, 0)	0 (0, 0)
Ulanqab	Inner Mongolia	Northeast	Male	15 y～	0 (0, 0)	0 (0, 0)	0 (0, 0)	0 (0, 0)	0 (0, 0)	0 (0, 0)	0 (0, 0)	0 (0, 0)	0 (0, 0)	0 (0, 0)	0 (0, 0)	0 (0, 0)	0 (0, 0)	0 (0, 0)	0 (0, 0)	0 (0, 0)	0 (0, 0)	0 (0, 0)	0 (0, 0)	0 (0, 0)	0 (0, 0)	0 (0, 0)	0 (0, 0)	0 (0, 0)	0 (0, 0)	0 (0, 0)	0 (0, 0)	0 (0, 0)
Ulanqab	Inner Mongolia	Northeast	Male	20 y～	0 (0, 0)	0 (0, 0)	0 (0, 0)	0 (0, 0)	0 (0, 0)	0 (0, 0)	0 (0, 0)	0 (0, 0)	0 (0, 0)	0 (0, 0)	0 (0, 0)	0 (0, 0)	0 (0, 0)	0 (0, 0)	0 (0, 0)	0 (0, 0)	0 (0, 0)	0 (0, 0)	0 (0, 0)	0 (0, 0)	0 (0, 0)	0 (0, 0)	0 (0, 0)	0 (0, 0)	0 (0, 0)	0 (0, 0)	0 (0, 0)	0 (0, 0)
Ulanqab	Inner Mongolia	Northeast	Male	25 y～	0 (0, 0)	0 (0, 0)	0 (0, 0)	0 (0, 0)	0 (0, 0)	0 (0, 0)	0 (0, 0)	0 (0, 0)	0 (0, 0)	0 (0, 0)	0 (0, 0)	0 (0, 0)	0 (0, 0)	0 (0, 0)	0 (0, 0)	0 (0, 0)	0 (0, 0)	0 (0, 0)	0 (0, 0)	0 (0, 0)	0 (0, 0)	0 (0, 0)	0 (0, 0)	0 (0, 0)	0 (0, 0)	0 (0, 0)	0 (0, 0)	1 (0, 1)
Ulanqab	Inner Mongolia	Northeast	Male	30 y～	0 (0, 0)	1 (0, 1)	0 (0, 0)	1 (1, 1)	0 (0, 0)	0 (0, 0)	0 (0, 0)	0 (0, 0)	0 (0, 0)	0 (0, 0)	0 (0, 0)	0 (0, 0)	0 (0, 0)	0 (0, 0)	0 (0, 0)	0 (0, 0)	0 (0, 0)	0 (0, 0)	0 (0, 0)	0 (0, 0)	0 (0, 0)	0 (0, 0)	0 (0, 0)	1 (0, 1)	0 (0, 0)	1 (1, 1)	0 (0, 0)	2 (1, 2)
Ulanqab	Inner Mongolia	Northeast	Male	35 y～	1 (0, 1)	1 (1, 1)	0 (0, 1)	2 (2, 2)	0 (0, 0)	0 (0, 0)	0 (0, 0)	0 (0, 0)	0 (0, 0)	0 (0, 0)	0 (0, 0)	0 (0, 0)	0 (0, 0)	0 (0, 0)	0 (0, 0)	0 (0, 0)	0 (0, 0)	0 (0, 0)	0 (0, 0)	0 (0, 0)	0 (0, 0)	1 (1, 1)	0 (0, 0)	1 (1, 1)	1 (1, 1)	2 (2, 2)	1 (1, 1)	4 (3, 4)
Ulanqab	Inner Mongolia	Northeast	Male	40 y～	1 (1, 1)	2 (2, 2)	1 (1, 1)	4 (3, 5)	0 (0, 0)	0 (0, 0)	0 (0, 0)	0 (0, 0)	0 (0, 0)	0 (0, 0)	0 (0, 0)	0 (0, 0)	0 (0, 0)	0 (0, 0)	0 (0, 0)	0 (0, 0)	0 (0, 0)	0 (0, 0)	0 (0, 0)	0 (0, 0)	1 (1, 1)	1 (1, 2)	1 (1, 1)	3 (2, 3)	2 (2, 2)	4 (3, 4)	2 (1, 2)	7 (6, 8)
Ulanqab	Inner Mongolia	Northeast	Male	45 y～	1 (1, 2)	2 (2, 3)	1 (1, 1)	5 (4, 6)	0 (0, 0)	0 (0, 0)	0 (0, 0)	0 (0, 0)	0 (0, 0)	0 (0, 0)	0 (0, 0)	1 (0, 1)	0 (0, 0)	0 (0, 0)	0 (0, 0)	0 (0, 0)	0 (0, 0)	0 (0, 0)	0 (0, 0)	0 (0, 0)	1 (1, 1)	2 (2, 2)	1 (1, 1)	4 (3, 4)	3 (2, 3)	5 (4, 5)	3 (2, 3)	10 (9, 11)
Ulanqab	Inner Mongolia	Northeast	Male	50 y～	2 (1, 2)	3 (2, 3)	2 (1, 2)	6 (5, 7)	0 (0, 0)	0 (0, 0)	0 (0, 0)	0 (0, 0)	0 (0, 0)	1 (0, 1)	0 (0, 0)	1 (1, 1)	0 (0, 0)	0 (0, 0)	0 (0, 0)	0 (0, 0)	0 (0, 0)	0 (0, 0)	0 (0, 0)	0 (0, 0)	1 (1, 1)	2 (2, 3)	1 (1, 1)	5 (4, 5)	3 (3, 4)	6 (5, 7)	3 (3, 4)	12 (10, 14)
Ulanqab	Inner Mongolia	Northeast	Male	55 y～	2 (2, 3)	4 (4, 5)	2 (2, 3)	9 (8, 11)	0 (0, 0)	0 (0, 0)	0 (0, 0)	1 (1, 1)	1 (1, 1)	1 (1, 1)	1 (1, 1)	3 (2, 3)	0 (0, 0)	0 (0, 0)	0 (0, 0)	0 (0, 0)	0 (0, 0)	0 (0, 0)	0 (0, 0)	0 (0, 0)	2 (2, 2)	4 (3, 4)	2 (2, 2)	8 (7, 9)	6 (5, 7)	10 (8, 11)	5 (5, 6)	21 (18, 24)
Ulanqab	Inner Mongolia	Northeast	Male	60 y～	2 (1, 2)	3 (3, 4)	2 (1, 2)	7 (6, 8)	0 (0, 0)	0 (0, 1)	0 (0, 0)	1 (1, 1)	1 (1, 1)	1 (1, 1)	1 (1, 1)	3 (2, 3)	0 (0, 0)	0 (0, 0)	0 (0, 0)	0 (0, 0)	0 (0, 0)	0 (0, 0)	0 (0, 0)	0 (0, 0)	2 (1, 2)	3 (3, 4)	2 (1, 2)	7 (6, 7)	5 (4, 6)	9 (7, 10)	4 (4, 5)	18 (15, 21)
Ulanqab	Inner Mongolia	Northeast	Male	65 y～	2 (1, 2)	3 (3, 4)	2 (1, 2)	7 (6, 8)	0 (0, 1)	1 (1, 1)	0 (0, 0)	2 (1, 2)	1 (1, 1)	1 (1, 2)	1 (1, 1)	3 (2, 4)	0 (0, 0)	0 (0, 0)	0 (0, 0)	0 (0, 1)	0 (0, 0)	0 (0, 0)	0 (0, 0)	0 (0, 0)	2 (2, 2)	4 (3, 4)	2 (1, 2)	7 (6, 8)	5 (4, 6)	9 (8, 11)	5 (4, 6)	19 (16, 23)
Ulanqab	Inner Mongolia	Northeast	Male	70 y～	2 (2, 3)	5 (4, 5)	2 (2, 3)	9 (7, 11)	1 (1, 1)	1 (1, 2)	1 (1, 1)	3 (3, 4)	1 (1, 1)	2 (1, 2)	1 (1, 1)	4 (3, 5)	0 (0, 0)	0 (0, 0)	0 (0, 0)	1 (1, 1)	0 (0, 0)	0 (0, 0)	0 (0, 0)	0 (0, 1)	3 (2, 3)	5 (4, 6)	2 (2, 3)	10 (9, 11)	8 (6, 9)	13 (11, 15)	7 (6, 8)	27 (22, 32)
Ulanqab	Inner Mongolia	Northeast	Male	75 y～	3 (2, 3)	5 (4, 6)	2 (2, 3)	10 (8, 11)	1 (1, 2)	2 (2, 2)	1 (1, 1)	5 (4, 5)	1 (1, 1)	1 (1, 2)	1 (1, 1)	3 (3, 4)	0 (0, 0)	0 (0, 1)	0 (0, 0)	1 (1, 1)	0 (0, 0)	0 (0, 0)	0 (0, 0)	0 (0, 1)	3 (2, 3)	5 (4, 6)	3 (2, 3)	10 (9, 12)	8 (7, 10)	14 (12, 16)	8 (6, 9)	30 (24, 35)
Ulanqab	Inner Mongolia	Northeast	Male	80 y～	2 (2, 2)	4 (3, 4)	2 (1, 2)	7 (6, 9)	1 (1, 1)	2 (2, 2)	1 (1, 1)	4 (4, 5)	1 (0, 1)	1 (1, 1)	0 (0, 1)	2 (1, 2)	0 (0, 0)	1 (0, 1)	0 (0, 0)	1 (1, 2)	0 (0, 0)	0 (0, 0)	0 (0, 0)	0 (0, 0)	2 (2, 2)	4 (3, 4)	2 (1, 2)	7 (6, 8)	6 (5, 7)	11 (9, 13)	5 (4, 6)	22 (18, 26)
Ulanqab	Inner Mongolia	Northeast	Male	85 y～	2 (1, 2)	3 (3, 4)	2 (1, 2)	7 (5, 8)	1 (1, 1)	2 (2, 2)	1 (1, 1)	5 (4, 5)	0 (0, 0)	1 (0, 1)	0 (0, 0)	1 (1, 1)	1 (0, 1)	1 (1, 1)	1 (0, 1)	2 (2, 3)	0 (0, 0)	0 (0, 0)	0 (0, 0)	0 (0, 0)	1 (1, 1)	2 (2, 3)	1 (1, 1)	5 (4, 6)	5 (4, 6)	10 (8, 11)	5 (4, 6)	20 (16, 23)
Ulanqab	Inner Mongolia	Northeast	Female	0 y～	0 (0, 0)	0 (0, 0)	0 (0, 0)	0 (0, 0)	0 (0, 0)	0 (0, 0)	0 (0, 0)	0 (0, 0)	0 (0, 0)	0 (0, 0)	0 (0, 0)	0 (0, 0)	0 (0, 0)	0 (0, 0)	0 (0, 0)	0 (0, 0)	0 (0, 0)	0 (0, 0)	0 (0, 0)	0 (0, 0)	0 (0, 0)	0 (0, 0)	0 (0, 0)	0 (0, 0)	0 (0, 0)	0 (0, 0)	0 (0, 0)	0 (0, 0)
Ulanqab	Inner Mongolia	Northeast	Female	1 y～	0 (0, 0)	0 (0, 0)	0 (0, 0)	0 (0, 0)	0 (0, 0)	0 (0, 0)	0 (0, 0)	0 (0, 0)	0 (0, 0)	0 (0, 0)	0 (0, 0)	0 (0, 0)	0 (0, 0)	0 (0, 0)	0 (0, 0)	0 (0, 0)	0 (0, 0)	0 (0, 0)	0 (0, 0)	0 (0, 0)	0 (0, 0)	0 (0, 0)	0 (0, 0)	0 (0, 0)	0 (0, 0)	0 (0, 0)	0 (0, 0)	0 (0, 0)
Ulanqab	Inner Mongolia	Northeast	Female	5 y～	0 (0, 0)	0 (0, 0)	0 (0, 0)	0 (0, 0)	0 (0, 0)	0 (0, 0)	0 (0, 0)	0 (0, 0)	0 (0, 0)	0 (0, 0)	0 (0, 0)	0 (0, 0)	0 (0, 0)	0 (0, 0)	0 (0, 0)	0 (0, 0)	0 (0, 0)	0 (0, 0)	0 (0, 0)	0 (0, 0)	0 (0, 0)	0 (0, 0)	0 (0, 0)	0 (0, 0)	0 (0, 0)	0 (0, 0)	0 (0, 0)	0 (0, 0)
Ulanqab	Inner Mongolia	Northeast	Female	10 y～	0 (0, 0)	0 (0, 0)	0 (0, 0)	0 (0, 0)	0 (0, 0)	0 (0, 0)	0 (0, 0)	0 (0, 0)	0 (0, 0)	0 (0, 0)	0 (0, 0)	0 (0, 0)	0 (0, 0)	0 (0, 0)	0 (0, 0)	0 (0, 0)	0 (0, 0)	0 (0, 0)	0 (0, 0)	0 (0, 0)	0 (0, 0)	0 (0, 0)	0 (0, 0)	0 (0, 0)	0 (0, 0)	0 (0, 0)	0 (0, 0)	0 (0, 0)
Ulanqab	Inner Mongolia	Northeast	Female	15 y～	0 (0, 0)	0 (0, 0)	0 (0, 0)	0 (0, 0)	0 (0, 0)	0 (0, 0)	0 (0, 0)	0 (0, 0)	0 (0, 0)	0 (0, 0)	0 (0, 0)	0 (0, 0)	0 (0, 0)	0 (0, 0)	0 (0, 0)	0 (0, 0)	0 (0, 0)	0 (0, 0)	0 (0, 0)	0 (0, 0)	0 (0, 0)	0 (0, 0)	0 (0, 0)	0 (0, 0)	0 (0, 0)	0 (0, 0)	0 (0, 0)	0 (0, 0)
Ulanqab	Inner Mongolia	Northeast	Female	20 y～	0 (0, 0)	0 (0, 0)	0 (0, 0)	0 (0, 0)	0 (0, 0)	0 (0, 0)	0 (0, 0)	0 (0, 0)	0 (0, 0)	0 (0, 0)	0 (0, 0)	0 (0, 0)	0 (0, 0)	0 (0, 0)	0 (0, 0)	0 (0, 0)	0 (0, 0)	0 (0, 0)	0 (0, 0)	0 (0, 0)	0 (0, 0)	0 (0, 0)	0 (0, 0)	0 (0, 0)	0 (0, 0)	0 (0, 0)	0 (0, 0)	0 (0, 0)
Ulanqab	Inner Mongolia	Northeast	Female	25 y～	0 (0, 0)	0 (0, 0)	0 (0, 0)	0 (0, 0)	0 (0, 0)	0 (0, 0)	0 (0, 0)	0 (0, 0)	0 (0, 0)	0 (0, 0)	0 (0, 0)	0 (0, 0)	0 (0, 0)	0 (0, 0)	0 (0, 0)	0 (0, 0)	0 (0, 0)	0 (0, 0)	0 (0, 0)	0 (0, 0)	0 (0, 0)	0 (0, 0)	0 (0, 0)	0 (0, 0)	0 (0, 0)	0 (0, 0)	0 (0, 0)	0 (0, 0)
Ulanqab	Inner Mongolia	Northeast	Female	30 y～	0 (0, 0)	0 (0, 0)	0 (0, 0)	0 (0, 0)	0 (0, 0)	0 (0, 0)	0 (0, 0)	0 (0, 0)	0 (0, 0)	0 (0, 0)	0 (0, 0)	0 (0, 0)	0 (0, 0)	0 (0, 0)	0 (0, 0)	0 (0, 0)	0 (0, 0)	0 (0, 0)	0 (0, 0)	0 (0, 0)	0 (0, 0)	0 (0, 0)	0 (0, 0)	0 (0, 0)	0 (0, 0)	0 (0, 0)	0 (0, 0)	0 (0, 0)
Ulanqab	Inner Mongolia	Northeast	Female	35 y～	0 (0, 0)	0 (0, 0)	0 (0, 0)	1 (0, 1)	0 (0, 0)	0 (0, 0)	0 (0, 0)	0 (0, 0)	0 (0, 0)	0 (0, 0)	0 (0, 0)	0 (0, 0)	0 (0, 0)	0 (0, 0)	0 (0, 0)	0 (0, 0)	0 (0, 0)	0 (0, 0)	0 (0, 0)	0 (0, 0)	0 (0, 0)	0 (0, 0)	0 (0, 0)	0 (0, 0)	0 (0, 0)	1 (0, 1)	0 (0, 0)	1 (1, 1)
Ulanqab	Inner Mongolia	Northeast	Female	40 y～	0 (0, 0)	1 (0, 1)	0 (0, 0)	1 (1, 1)	0 (0, 0)	0 (0, 0)	0 (0, 0)	0 (0, 0)	0 (0, 0)	0 (0, 0)	0 (0, 0)	0 (0, 0)	0 (0, 0)	0 (0, 0)	0 (0, 0)	0 (0, 0)	0 (0, 0)	0 (0, 0)	0 (0, 0)	0 (0, 0)	0 (0, 0)	0 (0, 0)	0 (0, 0)	1 (1, 1)	0 (0, 0)	1 (1, 1)	0 (0, 0)	2 (1, 2)
Ulanqab	Inner Mongolia	Northeast	Female	45 y～	0 (0, 0)	1 (1, 1)	0 (0, 0)	1 (1, 1)	0 (0, 0)	0 (0, 0)	0 (0, 0)	0 (0, 0)	0 (0, 0)	0 (0, 0)	0 (0, 0)	0 (0, 0)	0 (0, 0)	0 (0, 0)	0 (0, 0)	0 (0, 0)	0 (0, 0)	0 (0, 0)	0 (0, 0)	0 (0, 0)	0 (0, 0)	1 (1, 1)	0 (0, 0)	1 (1, 1)	1 (1, 1)	2 (2, 2)	0 (0, 0)	3 (2, 3)
Ulanqab	Inner Mongolia	Northeast	Female	50 y～	0 (0, 0)	1 (1, 1)	0 (0, 0)	2 (1, 2)	0 (0, 0)	0 (0, 0)	0 (0, 0)	0 (0, 0)	0 (0, 0)	0 (0, 0)	0 (0, 0)	1 (0, 1)	0 (0, 0)	0 (0, 0)	0 (0, 0)	0 (0, 0)	0 (0, 0)	0 (0, 0)	0 (0, 0)	0 (0, 0)	0 (0, 0)	1 (1, 1)	0 (0, 0)	2 (1, 2)	1 (1, 1)	3 (2, 3)	1 (0, 1)	4 (3, 5)
Ulanqab	Inner Mongolia	Northeast	Female	55 y～	1 (1, 1)	2 (1, 2)	0 (0, 0)	3 (2, 3)	0 (0, 0)	0 (0, 0)	0 (0, 0)	0 (0, 0)	0 (0, 0)	1 (0, 1)	0 (0, 0)	1 (1, 1)	0 (0, 0)	0 (0, 0)	0 (0, 0)	0 (0, 0)	0 (0, 0)	0 (0, 0)	0 (0, 0)	0 (0, 0)	1 (0, 1)	1 (1, 2)	0 (0, 0)	2 (2, 3)	1 (1, 2)	4 (3, 5)	1 (1, 1)	7 (5, 7)
Ulanqab	Inner Mongolia	Northeast	Female	60 y～	1 (1, 1)	2 (1, 2)	0 (0, 0)	3 (2, 3)	0 (0, 0)	0 (0, 0)	0 (0, 0)	0 (0, 0)	0 (0, 0)	1 (0, 1)	0 (0, 0)	1 (1, 1)	0 (0, 0)	0 (0, 0)	0 (0, 0)	0 (0, 0)	0 (0, 0)	0 (0, 0)	0 (0, 0)	0 (0, 0)	1 (1, 1)	2 (1, 2)	0 (0, 0)	3 (2, 3)	2 (1, 2)	4 (4, 5)	1 (1, 1)	7 (6, 8)
Ulanqab	Inner Mongolia	Northeast	Female	65 y～	1 (1, 1)	2 (2, 3)	1 (1, 1)	4 (3, 5)	0 (0, 0)	0 (0, 0)	0 (0, 0)	1 (1, 1)	0 (0, 0)	1 (1, 1)	0 (0, 0)	1 (1, 1)	0 (0, 0)	0 (0, 0)	0 (0, 0)	0 (0, 0)	0 (0, 0)	0 (0, 0)	0 (0, 0)	0 (0, 0)	1 (1, 1)	2 (2, 2)	1 (0, 1)	4 (3, 4)	2 (2, 3)	6 (5, 7)	1 (1, 2)	10 (8, 11)
Ulanqab	Inner Mongolia	Northeast	Female	70 y～	2 (1, 2)	4 (3, 5)	1 (1, 1)	6 (5, 7)	0 (0, 0)	1 (1, 1)	0 (0, 0)	1 (1, 1)	0 (0, 0)	1 (1, 1)	0 (0, 0)	1 (1, 2)	0 (0, 0)	0 (0, 0)	0 (0, 0)	0 (0, 1)	0 (0, 0)	0 (0, 0)	0 (0, 0)	0 (0, 0)	1 (1, 2)	3 (3, 4)	1 (1, 1)	6 (5, 6)	4 (3, 4)	10 (8, 11)	2 (2, 3)	15 (13, 18)
Ulanqab	Inner Mongolia	Northeast	Female	75 y～	2 (2, 2)	5 (4, 6)	1 (1, 1)	8 (6, 9)	0 (0, 0)	1 (1, 1)	0 (0, 0)	2 (2, 2)	0 (0, 0)	1 (1, 1)	0 (0, 0)	1 (1, 2)	0 (0, 0)	0 (0, 1)	0 (0, 0)	1 (1, 1)	0 (0, 0)	0 (0, 0)	0 (0, 0)	1 (0, 1)	2 (1, 2)	4 (4, 5)	1 (1, 1)	7 (6, 8)	4 (4, 5)	12 (10, 14)	3 (2, 3)	20 (16, 23)
Ulanqab	Inner Mongolia	Northeast	Female	80 y～	2 (1, 2)	4 (3, 5)	1 (1, 1)	6 (5, 8)	0 (0, 1)	1 (1, 1)	0 (0, 0)	2 (2, 2)	0 (0, 0)	1 (0, 1)	0 (0, 0)	1 (1, 1)	0 (0, 0)	0 (0, 1)	0 (0, 0)	1 (1, 1)	0 (0, 0)	0 (0, 0)	0 (0, 0)	0 (0, 0)	1 (1, 1)	3 (3, 4)	1 (1, 1)	5 (4, 6)	4 (3, 4)	9 (8, 11)	2 (2, 3)	15 (12, 18)
Ulanqab	Inner Mongolia	Northeast	Female	85 y～	2 (1, 2)	5 (4, 5)	1 (1, 1)	7 (6, 9)	1 (1, 1)	2 (1, 2)	0 (0, 1)	3 (2, 3)	0 (0, 0)	0 (0, 0)	0 (0, 0)	1 (0, 1)	0 (0, 0)	1 (1, 1)	0 (0, 0)	1 (1, 2)	0 (0, 0)	0 (0, 0)	0 (0, 0)	0 (0, 0)	1 (1, 1)	3 (2, 3)	1 (1, 1)	5 (4, 5)	4 (3, 5)	10 (8, 12)	3 (2, 3)	17 (14, 20)
Xilingol League	Inner Mongolia	Northeast	Male	0 y～	0 (0, 0)	0 (0, 0)	0 (0, 0)	0 (0, 0)	0 (0, 0)	0 (0, 0)	0 (0, 0)	0 (0, 0)	0 (0, 0)	0 (0, 0)	0 (0, 0)	0 (0, 0)	0 (0, 0)	0 (0, 0)	0 (0, 0)	0 (0, 0)	0 (0, 0)	0 (0, 0)	0 (0, 0)	0 (0, 0)	0 (0, 0)	0 (0, 0)	0 (0, 0)	0 (0, 0)	0 (0, 0)	0 (0, 0)	0 (0, 0)	0 (0, 0)
Xilingol League	Inner Mongolia	Northeast	Male	1 y～	0 (0, 0)	0 (0, 0)	0 (0, 0)	0 (0, 0)	0 (0, 0)	0 (0, 0)	0 (0, 0)	0 (0, 0)	0 (0, 0)	0 (0, 0)	0 (0, 0)	0 (0, 0)	0 (0, 0)	0 (0, 0)	0 (0, 0)	0 (0, 0)	0 (0, 0)	0 (0, 0)	0 (0, 0)	0 (0, 0)	0 (0, 0)	0 (0, 0)	0 (0, 0)	0 (0, 0)	0 (0, 0)	0 (0, 0)	0 (0, 0)	0 (0, 0)
Xilingol League	Inner Mongolia	Northeast	Male	5 y～	0 (0, 0)	0 (0, 0)	0 (0, 0)	0 (0, 0)	0 (0, 0)	0 (0, 0)	0 (0, 0)	0 (0, 0)	0 (0, 0)	0 (0, 0)	0 (0, 0)	0 (0, 0)	0 (0, 0)	0 (0, 0)	0 (0, 0)	0 (0, 0)	0 (0, 0)	0 (0, 0)	0 (0, 0)	0 (0, 0)	0 (0, 0)	0 (0, 0)	0 (0, 0)	0 (0, 0)	0 (0, 0)	0 (0, 0)	0 (0, 0)	0 (0, 0)
Xilingol League	Inner Mongolia	Northeast	Male	10 y～	0 (0, 0)	0 (0, 0)	0 (0, 0)	0 (0, 0)	0 (0, 0)	0 (0, 0)	0 (0, 0)	0 (0, 0)	0 (0, 0)	0 (0, 0)	0 (0, 0)	0 (0, 0)	0 (0, 0)	0 (0, 0)	0 (0, 0)	0 (0, 0)	0 (0, 0)	0 (0, 0)	0 (0, 0)	0 (0, 0)	0 (0, 0)	0 (0, 0)	0 (0, 0)	0 (0, 0)	0 (0, 0)	0 (0, 0)	0 (0, 0)	0 (0, 0)
Xilingol League	Inner Mongolia	Northeast	Male	15 y～	0 (0, 0)	0 (0, 0)	0 (0, 0)	0 (0, 0)	0 (0, 0)	0 (0, 0)	0 (0, 0)	0 (0, 0)	0 (0, 0)	0 (0, 0)	0 (0, 0)	0 (0, 0)	0 (0, 0)	0 (0, 0)	0 (0, 0)	0 (0, 0)	0 (0, 0)	0 (0, 0)	0 (0, 0)	0 (0, 0)	0 (0, 0)	0 (0, 0)	0 (0, 0)	0 (0, 0)	0 (0, 0)	0 (0, 0)	0 (0, 0)	1 (0, 1)
Xilingol League	Inner Mongolia	Northeast	Male	20 y～	0 (0, 0)	0 (0, 0)	0 (0, 0)	1 (0, 1)	0 (0, 0)	0 (0, 0)	0 (0, 0)	0 (0, 0)	0 (0, 0)	0 (0, 0)	0 (0, 0)	0 (0, 0)	0 (0, 0)	0 (0, 0)	0 (0, 0)	0 (0, 0)	0 (0, 0)	0 (0, 0)	0 (0, 0)	0 (0, 0)	0 (0, 0)	0 (0, 0)	0 (0, 0)	0 (0, 0)	0 (0, 0)	0 (0, 1)	0 (0, 0)	1 (1, 1)
Xilingol League	Inner Mongolia	Northeast	Male	25 y～	0 (0, 0)	0 (0, 0)	0 (0, 0)	1 (1, 1)	0 (0, 0)	0 (0, 0)	0 (0, 0)	0 (0, 0)	0 (0, 0)	0 (0, 0)	0 (0, 0)	0 (0, 0)	0 (0, 0)	0 (0, 0)	0 (0, 0)	0 (0, 0)	0 (0, 0)	0 (0, 0)	0 (0, 0)	0 (0, 0)	0 (0, 0)	0 (0, 0)	0 (0, 0)	0 (0, 0)	0 (0, 0)	1 (1, 1)	0 (0, 0)	1 (1, 1)
Xilingol League	Inner Mongolia	Northeast	Male	30 y～	0 (0, 0)	1 (1, 1)	1 (0, 1)	2 (2, 2)	0 (0, 0)	0 (0, 0)	0 (0, 0)	0 (0, 0)	0 (0, 0)	0 (0, 0)	0 (0, 0)	0 (0, 0)	0 (0, 0)	0 (0, 0)	0 (0, 0)	0 (0, 0)	0 (0, 0)	0 (0, 0)	0 (0, 0)	0 (0, 0)	0 (0, 0)	1 (1, 1)	0 (0, 0)	1 (1, 1)	0 (0, 1)	2 (2, 2)	1 (1, 1)	3 (3, 4)
Xilingol League	Inner Mongolia	Northeast	Male	35 y～	1 (0, 1)	2 (2, 3)	1 (1, 1)	4 (4, 5)	0 (0, 0)	0 (0, 0)	0 (0, 0)	0 (0, 0)	0 (0, 0)	0 (0, 0)	0 (0, 0)	0 (0, 0)	0 (0, 0)	0 (0, 0)	0 (0, 0)	0 (0, 0)	0 (0, 0)	0 (0, 0)	0 (0, 0)	0 (0, 0)	0 (0, 0)	1 (1, 2)	1 (1, 1)	3 (2, 3)	1 (1, 1)	4 (4, 5)	2 (2, 2)	7 (6, 8)
Xilingol League	Inner Mongolia	Northeast	Male	40 y～	1 (1, 1)	5 (4, 5)	2 (2, 3)	8 (7, 9)	0 (0, 0)	0 (0, 0)	0 (0, 0)	0 (0, 0)	0 (0, 0)	0 (0, 0)	0 (0, 0)	1 (0, 1)	0 (0, 0)	0 (0, 0)	0 (0, 0)	0 (0, 0)	0 (0, 0)	0 (0, 0)	0 (0, 0)	0 (0, 0)	1 (1, 1)	3 (3, 4)	1 (1, 2)	5 (5, 6)	2 (2, 2)	9 (7, 10)	4 (3, 5)	15 (12, 17)
Xilingol League	Inner Mongolia	Northeast	Male	45 y～	2 (1, 2)	6 (5, 6)	3 (3, 4)	10 (9, 12)	0 (0, 0)	0 (0, 0)	0 (0, 0)	0 (0, 0)	0 (0, 0)	1 (0, 1)	0 (0, 0)	1 (1, 2)	0 (0, 0)	0 (0, 0)	0 (0, 0)	0 (0, 0)	0 (0, 0)	0 (0, 0)	0 (0, 0)	0 (0, 0)	1 (1, 1)	4 (4, 5)	2 (2, 3)	8 (7, 9)	3 (3, 3)	11 (9, 13)	6 (5, 7)	21 (17, 23)
Xilingol League	Inner Mongolia	Northeast	Male	50 y～	2 (1, 2)	7 (5, 7)	4 (3, 4)	12 (10, 13)	0 (0, 0)	0 (0, 0)	0 (0, 0)	1 (0, 1)	0 (0, 0)	1 (1, 2)	1 (1, 1)	2 (2, 3)	0 (0, 0)	0 (0, 0)	0 (0, 0)	0 (0, 0)	0 (0, 0)	0 (0, 0)	0 (0, 0)	0 (0, 0)	1 (1, 2)	5 (4, 6)	3 (2, 3)	10 (8, 11)	4 (3, 4)	14 (11, 16)	8 (6, 9)	25 (21, 29)
Xilingol League	Inner Mongolia	Northeast	Male	55 y～	3 (2, 3)	11 (9, 12)	6 (5, 6)	19 (16, 22)	0 (0, 0)	1 (1, 1)	0 (0, 1)	2 (1, 2)	1 (1, 1)	3 (2, 4)	2 (1, 2)	5 (4, 7)	0 (0, 0)	0 (0, 0)	0 (0, 0)	1 (0, 1)	0 (0, 0)	0 (0, 0)	0 (0, 0)	1 (1, 1)	2 (2, 3)	9 (7, 10)	5 (4, 5)	16 (13, 18)	6 (5, 7)	23 (19, 27)	13 (11, 15)	43 (35, 49)
Xilingol League	Inner Mongolia	Northeast	Male	60 y～	2 (2, 2)	8 (6, 9)	4 (3, 4)	14 (11, 16)	0 (0, 0)	1 (1, 1)	1 (0, 1)	2 (2, 2)	1 (1, 1)	3 (2, 4)	2 (1, 2)	6 (4, 7)	0 (0, 0)	0 (0, 0)	0 (0, 0)	1 (0, 1)	0 (0, 0)	0 (0, 0)	0 (0, 0)	1 (0, 1)	2 (2, 2)	7 (6, 9)	4 (3, 4)	13 (11, 15)	5 (4, 6)	20 (16, 23)	10 (8, 12)	36 (29, 41)
Xilingol League	Inner Mongolia	Northeast	Male	65 y～	2 (2, 2)	8 (6, 9)	4 (3, 4)	14 (11, 16)	1 (0, 1)	2 (1, 2)	1 (1, 1)	3 (2, 4)	1 (1, 1)	3 (2, 4)	2 (1, 2)	6 (5, 8)	0 (0, 0)	1 (0, 1)	0 (0, 0)	1 (1, 1)	0 (0, 0)	0 (0, 0)	0 (0, 0)	1 (0, 1)	2 (2, 2)	8 (7, 9)	4 (3, 5)	14 (12, 16)	6 (5, 7)	22 (18, 25)	11 (9, 13)	39 (31, 45)
Xilingol League	Inner Mongolia	Northeast	Male	70 y～	3 (2, 3)	10 (8, 12)	5 (4, 6)	18 (14, 21)	1 (1, 1)	3 (3, 4)	2 (2, 2)	6 (5, 7)	1 (1, 2)	4 (3, 5)	2 (2, 3)	8 (6, 9)	0 (0, 0)	1 (1, 1)	0 (0, 1)	2 (1, 2)	0 (0, 0)	0 (0, 1)	0 (0, 0)	1 (1, 1)	3 (2, 3)	11 (10, 13)	6 (5, 6)	20 (17, 23)	8 (7, 10)	30 (25, 36)	16 (13, 18)	54 (44, 64)
Xilingol League	Inner Mongolia	Northeast	Male	75 y～	3 (2, 3)	11 (9, 13)	6 (4, 7)	19 (15, 23)	2 (1, 2)	5 (4, 6)	3 (2, 3)	9 (8, 11)	1 (1, 1)	4 (3, 5)	2 (1, 2)	7 (5, 8)	0 (0, 0)	1 (1, 2)	1 (0, 1)	2 (2, 3)	0 (0, 0)	1 (0, 1)	0 (0, 0)	1 (1, 1)	3 (2, 3)	12 (10, 13)	6 (5, 7)	20 (17, 23)	9 (7, 11)	33 (27, 39)	17 (14, 20)	59 (48, 69)
Xilingol League	Inner Mongolia	Northeast	Male	80 y～	2 (2, 2)	9 (7, 10)	4 (3, 5)	15 (12, 17)	1 (1, 1)	5 (4, 6)	2 (2, 3)	9 (7, 10)	1 (0, 1)	2 (2, 3)	1 (1, 1)	4 (3, 5)	0 (0, 0)	1 (1, 2)	1 (1, 1)	3 (2, 3)	0 (0, 0)	0 (0, 0)	0 (0, 0)	1 (1, 1)	2 (2, 2)	8 (7, 9)	4 (3, 4)	14 (12, 16)	6 (5, 8)	26 (21, 30)	13 (10, 15)	45 (36, 53)
Xilingol League	Inner Mongolia	Northeast	Male	85 y～	2 (2, 2)	8 (6, 9)	4 (3, 4)	14 (11, 16)	1 (1, 2)	5 (4, 6)	3 (2, 3)	9 (8, 11)	0 (0, 0)	1 (1, 2)	1 (0, 1)	2 (2, 3)	1 (0, 1)	2 (2, 3)	1 (1, 1)	4 (3, 5)	0 (0, 0)	0 (0, 0)	0 (0, 0)	1 (0, 1)	1 (1, 2)	6 (5, 6)	3 (2, 3)	10 (8, 11)	6 (5, 7)	23 (18, 27)	11 (9, 13)	39 (32, 46)
Xilingol League	Inner Mongolia	Northeast	Female	0 y～	0 (0, 0)	0 (0, 0)	0 (0, 0)	0 (0, 0)	0 (0, 0)	0 (0, 0)	0 (0, 0)	0 (0, 0)	0 (0, 0)	0 (0, 0)	0 (0, 0)	0 (0, 0)	0 (0, 0)	0 (0, 0)	0 (0, 0)	0 (0, 0)	0 (0, 0)	0 (0, 0)	0 (0, 0)	0 (0, 0)	0 (0, 0)	0 (0, 0)	0 (0, 0)	0 (0, 0)	0 (0, 0)	0 (0, 0)	0 (0, 0)	0 (0, 0)
Xilingol League	Inner Mongolia	Northeast	Female	1 y～	0 (0, 0)	0 (0, 0)	0 (0, 0)	0 (0, 0)	0 (0, 0)	0 (0, 0)	0 (0, 0)	0 (0, 0)	0 (0, 0)	0 (0, 0)	0 (0, 0)	0 (0, 0)	0 (0, 0)	0 (0, 0)	0 (0, 0)	0 (0, 0)	0 (0, 0)	0 (0, 0)	0 (0, 0)	0 (0, 0)	0 (0, 0)	0 (0, 0)	0 (0, 0)	0 (0, 0)	0 (0, 0)	0 (0, 0)	0 (0, 0)	0 (0, 0)
Xilingol League	Inner Mongolia	Northeast	Female	5 y～	0 (0, 0)	0 (0, 0)	0 (0, 0)	0 (0, 0)	0 (0, 0)	0 (0, 0)	0 (0, 0)	0 (0, 0)	0 (0, 0)	0 (0, 0)	0 (0, 0)	0 (0, 0)	0 (0, 0)	0 (0, 0)	0 (0, 0)	0 (0, 0)	0 (0, 0)	0 (0, 0)	0 (0, 0)	0 (0, 0)	0 (0, 0)	0 (0, 0)	0 (0, 0)	0 (0, 0)	0 (0, 0)	0 (0, 0)	0 (0, 0)	0 (0, 0)
Xilingol League	Inner Mongolia	Northeast	Female	10 y～	0 (0, 0)	0 (0, 0)	0 (0, 0)	0 (0, 0)	0 (0, 0)	0 (0, 0)	0 (0, 0)	0 (0, 0)	0 (0, 0)	0 (0, 0)	0 (0, 0)	0 (0, 0)	0 (0, 0)	0 (0, 0)	0 (0, 0)	0 (0, 0)	0 (0, 0)	0 (0, 0)	0 (0, 0)	0 (0, 0)	0 (0, 0)	0 (0, 0)	0 (0, 0)	0 (0, 0)	0 (0, 0)	0 (0, 0)	0 (0, 0)	0 (0, 0)
Xilingol League	Inner Mongolia	Northeast	Female	15 y～	0 (0, 0)	0 (0, 0)	0 (0, 0)	0 (0, 0)	0 (0, 0)	0 (0, 0)	0 (0, 0)	0 (0, 0)	0 (0, 0)	0 (0, 0)	0 (0, 0)	0 (0, 0)	0 (0, 0)	0 (0, 0)	0 (0, 0)	0 (0, 0)	0 (0, 0)	0 (0, 0)	0 (0, 0)	0 (0, 0)	0 (0, 0)	0 (0, 0)	0 (0, 0)	0 (0, 0)	0 (0, 0)	0 (0, 0)	0 (0, 0)	0 (0, 0)
Xilingol League	Inner Mongolia	Northeast	Female	20 y～	0 (0, 0)	0 (0, 0)	0 (0, 0)	0 (0, 0)	0 (0, 0)	0 (0, 0)	0 (0, 0)	0 (0, 0)	0 (0, 0)	0 (0, 0)	0 (0, 0)	0 (0, 0)	0 (0, 0)	0 (0, 0)	0 (0, 0)	0 (0, 0)	0 (0, 0)	0 (0, 0)	0 (0, 0)	0 (0, 0)	0 (0, 0)	0 (0, 0)	0 (0, 0)	0 (0, 0)	0 (0, 0)	0 (0, 0)	0 (0, 0)	0 (0, 0)
Xilingol League	Inner Mongolia	Northeast	Female	25 y～	0 (0, 0)	0 (0, 0)	0 (0, 0)	0 (0, 0)	0 (0, 0)	0 (0, 0)	0 (0, 0)	0 (0, 0)	0 (0, 0)	0 (0, 0)	0 (0, 0)	0 (0, 0)	0 (0, 0)	0 (0, 0)	0 (0, 0)	0 (0, 0)	0 (0, 0)	0 (0, 0)	0 (0, 0)	0 (0, 0)	0 (0, 0)	0 (0, 0)	0 (0, 0)	0 (0, 0)	0 (0, 0)	0 (0, 0)	0 (0, 0)	1 (1, 1)
Xilingol League	Inner Mongolia	Northeast	Female	30 y～	0 (0, 0)	0 (0, 0)	0 (0, 0)	0 (0, 0)	0 (0, 0)	0 (0, 0)	0 (0, 0)	0 (0, 0)	0 (0, 0)	0 (0, 0)	0 (0, 0)	0 (0, 0)	0 (0, 0)	0 (0, 0)	0 (0, 0)	0 (0, 0)	0 (0, 0)	0 (0, 0)	0 (0, 0)	0 (0, 0)	0 (0, 0)	0 (0, 0)	0 (0, 0)	1 (1, 1)	0 (0, 0)	1 (1, 1)	0 (0, 0)	1 (1, 1)
Xilingol League	Inner Mongolia	Northeast	Female	35 y～	0 (0, 0)	1 (1, 1)	0 (0, 0)	1 (1, 1)	0 (0, 0)	0 (0, 0)	0 (0, 0)	0 (0, 0)	0 (0, 0)	0 (0, 0)	0 (0, 0)	0 (0, 0)	0 (0, 0)	0 (0, 0)	0 (0, 0)	0 (0, 0)	0 (0, 0)	0 (0, 0)	0 (0, 0)	0 (0, 0)	0 (0, 0)	0 (0, 0)	0 (0, 0)	0 (0, 1)	0 (0, 0)	1 (1, 2)	0 (0, 0)	2 (2, 2)
Xilingol League	Inner Mongolia	Northeast	Female	40 y～	0 (0, 0)	1 (1, 1)	0 (0, 0)	2 (1, 2)	0 (0, 0)	0 (0, 0)	0 (0, 0)	0 (0, 0)	0 (0, 0)	0 (0, 0)	0 (0, 0)	0 (0, 0)	0 (0, 0)	0 (0, 0)	0 (0, 0)	0 (0, 0)	0 (0, 0)	0 (0, 0)	0 (0, 0)	0 (0, 0)	0 (0, 0)	1 (1, 1)	0 (0, 0)	1 (1, 2)	0 (0, 1)	3 (2, 3)	1 (1, 1)	4 (3, 4)
Xilingol League	Inner Mongolia	Northeast	Female	45 y～	0 (0, 0)	2 (1, 2)	0 (0, 0)	2 (2, 3)	0 (0, 0)	0 (0, 0)	0 (0, 0)	0 (0, 0)	0 (0, 0)	1 (0, 1)	0 (0, 0)	1 (1, 1)	0 (0, 0)	0 (0, 0)	0 (0, 0)	0 (0, 0)	0 (0, 0)	0 (0, 0)	0 (0, 0)	0 (0, 0)	0 (0, 0)	2 (1, 2)	0 (0, 0)	2 (2, 3)	1 (1, 1)	4 (3, 5)	1 (1, 1)	6 (5, 7)
Xilingol League	Inner Mongolia	Northeast	Female	50 y～	0 (0, 0)	2 (2, 3)	1 (1, 1)	3 (3, 4)	0 (0, 0)	0 (0, 0)	0 (0, 0)	0 (0, 0)	0 (0, 0)	1 (1, 1)	0 (0, 0)	1 (1, 1)	0 (0, 0)	0 (0, 0)	0 (0, 0)	0 (0, 0)	0 (0, 0)	0 (0, 0)	0 (0, 0)	0 (0, 0)	0 (0, 0)	2 (2, 3)	1 (0, 1)	3 (3, 4)	1 (1, 1)	6 (5, 7)	1 (1, 2)	8 (7, 9)
[truncated: 11,331 more rows]
