# Supplementary material for: Indoor PM2.5 Mortality in China when Outdoor Air Meets 2021 WHO AQG
Source: Research Square preprint supplement (doi:10.21203/rs.3.rs-1137306/v1), 2021-12-09
Supplement: Supplementary file 2 [file 6b71c03aa477e019d4f902c6.xlsx]

## Sheet: Fig1b
Situation	Number of cases	Source of PM2.5	The attributable deaths of PM2.5 in Chinese urban (thousands)
			Mean	P2.5	P97.5	Controbution
2019	1000	Ambient	201.551	36.5071	32.056	0.44
2019	1000	Cooking	192.832	35.1537	30.994	0.43
2019	1000	Smoking	60.3002	10.9891	9.72232	0.13262
2019	1000	Total	454.683	82.65	72.7723
Ambient air meet WHO AQG 2021	1000	Ambient	30.9902	6.47839	6.1012	0.0945155
Ambient air meet WHO AQG 2021	1000	Cooking	229.405	47.4979	44.4748	0.69965
Ambient air meet WHO AQG 2021	1000	Smoking	67.4899	13.9908	13.1343	0.205834
Ambient air meet WHO AQG 2021	1000	Total	327.885	67.9672	63.7103

## Sheet: Fig1a
Situation	Number of cases	Disease	The attributable deaths of PM2.5 in Chinese urban (thousands)
			Mean	P2.5	P97.5	Controbution
2019	1000	IHD	142.155	25.5469	18.7754	0.312647
2019	1000	COPD	73.6154	12.4415	12.4402	0.161905
2019	1000	LC	62.2559	15.3961	13.8056	0.136922
2019	1000	LRI	30.6233	7.41502	8.38332	0.0673508
2019	1000	DM2	9.74677	1.92385	1.43731	0.0214364
2019	1000	Stroke	136.287	19.8655	17.379	0.29974
2019	1000	Total	454.683	82.65	72.7723
Ambient air meet WHO AQG 2021	1000	IHD	103.397	21.3897	17.8231	0.315346
Ambient air meet WHO AQG 2021	1000	COPD	52.2634	10.3267	10.4415	0.159396
Ambient air meet WHO AQG 2021	1000	LC	44.958	11.5895	11.3309	0.137115
Ambient air meet WHO AQG 2021	1000	LRI	21.3504	6.20977	7.18138	0.0651156
Ambient air meet WHO AQG 2021	1000	DM2	7.66061	1.75354	1.35238	0.0233637
Ambient air meet WHO AQG 2021	1000	Stroke	98.2553	16.4262	15.5901	0.299664
Ambient air meet WHO AQG 2021	1000	Total	327.885	67.9672	63.7103	1
